# Supplementary material for: Analysis of long and short enhancers in melanoma cell states
Source: eLife. 2021 Dec 7;10:e71735. doi: 10.7554/eLife.71735 (PMC8691835; doi:10.7554/eLife.71735)
Supplement: Supplementary file 1. — For the ATAC-seq-based library, modifications to the original sequence to allow DNA synthesis are indicated in the ‘Modification’ column. For the SOX-MITF combinations library, a table indicating the arrangement of the binding sites is provided. [file elife-71735-supp1.xlsx]

## Sheet: H3K27Ac library
Sequence	Location	Length (bp)	Phenotype reletionship
FOSL2_1	chr2:28497319-28500170	2852	Invasive
SERPINE1_1	chr7:100659924-100661401	1478	Invasive
SERPINE1_2	chr7:100741959-100743770	1812	Invasive
SERPINE1_6	chr7:100764536-100766346	1811	Invasive
FGF2_1	chr4:123684497-123687064	2568	Invasive
FGF2_2	chr4:123703105-123705658	2554	Invasive
FLNC_1	chr7:128466910-128468970	2061	Invasive
FLNC_3	chr7:128470187-128472454	2268	Invasive
HEG1_1	chr3:124703722-124705870	2149	Invasive
MAP3K14_1	chr17:43395856-43397426	1571	Invasive
BLK_1	chr8:11331324-11333226	1903	Invasive
BLK_3	chr8:11337718-11339530	1813	Invasive
BLK_5	chr8:11371497-11373562	2066	Invasive
BLK_6	chr8:11373637-11376002	2366	Invasive
COL1A2_1	chr7:93930341-93931627	1287	Invasive
COL5A1_1	chr9:137394161-137395586	1426	Invasive
COL5A1_2	chr9:137443032-137445005	1974	Invasive
COL5A1_3	chr9:137482939-137485083	2145	Invasive
COL5A1_4	chr9:137494547-137495765	1219	Invasive
COL5A1_5	chr9:137516301-137518747	2447	Invasive
COL5A1_6	chr9:137528077-137530270	2194	Invasive
COL5A1_8	chr9:137553107-137555386	2280	Invasive
SMURF2_1	chr17:62674380-62677279	2900	Invasive
SMURF2_2	chr17:62678115-62679923	1809	Invasive
SMURF2_3	chr17:62705221-62706439	1219	Invasive
ALPK2_1	chr18:56245604-56247508	1905	Invasive
ALPK2_2	chr18:56250818-56252384	1567	Invasive
AXL_2	chr19:41729006-41730486	1481	Invasive
ABCC3_1	chr17:48738539-48740224	1686	Invasive
BDNF_1	chr11:27720567-27723399	2833	Invasive
GPR39_1	chr2:133173225-133175628	2404	Invasive
GPR39_2	chr2:133195728-133198189	2462	Invasive
GPR39_3	chr2:133380117-133382213	2097	Invasive
EDN1_1	chr6:12289604-12291297	1694	Invasive
EDN1_3	chr6:12572995-12574200	1206	Invasive
CDH1_1	chr16:68794141-68796310	2170	Proliferative
CDH1_2	chr16:68819958-68821608	1651	Proliferative
SOX10_1	chr22:38363380-38365939	2560	Proliferative
SOX10_2	chr22:38380751-38383135	2385	Proliferative
SOX10_3	chr22:38411758-38414483	2726	Proliferative
SOX10_4	chr22:38414482-38415978	1413	Proliferative
SOX10_5	chr22:38433432-38435696	2265	Proliferative
IRF4_1	chr6:395245-397208	1964	Proliferative
GPM6B_2	chrX:13955341-13957452	2112	Proliferative
KIT_1	chr4:55708266-55710027	1762	Proliferative
MLANA_1	chr9:5895240-5897136	1897	Proliferative
SGCD_2	chr5:155902513-155904733	2221	Proliferative
SGCD_3	chr5:156015784-156018194	2411	Proliferative
MITF_1	chr3:69985219-69987802	2584	Proliferative
TYR_1	chr11:88900840-88902556	1717	Proliferative
TYR_2	chr11:88908483-88909755	1273	Proliferative
TYR_3	chr11:88910642-88912180	1539	Proliferative
RRAGD_1	chr6:90121320-90123322	2003	Proliferative

## Sheet: ATAC-seq library
Sequence name	Chromosome	Start	End	Sequence	Internal primer (spacer)	Ennhancer BC	Generation	Modification	Final sequence
FOSL2_1A	chr2	28497703	28498204	cccattttgcaaatgagaaaagagaaacttaggagaggttatgtaacATCAACTTTGTGGGCTGAGGCTGAGTGAAGACCTCGCAGAAGAGACCAGACCCAGCATGCTCCAGTAGCTCCACTGCAGGGGGTGGCTGCTTACGAGGACAGAGAGCAGAATTCAGACGACTCCAGCTGACCTACTTGGTGCAAGTCAAGTGAATACTAGTCGGGAGGGATTAGATGACTCAGCCTCTGCCTTCGTTGGAGTCAGGAAGTAGGCTTTGCAGTCCATTTCCTGGGGAATTTTCAGATGGACCAGTGATTTCATTTTCCTCTTCTAAAGCACCCCCATGCACAGGGAAAGGTTGTTCACGTGGCCATTTGGATGAAGCCAACGGATCTGATGTCTTAAAGGAGA…	CGCACTGGTCACGGAG	CCAACAAT	TWIST synthesis	-	>FOSL2_1A cccattttgcaaatgagaaaagagaaacttaggagaggttatgtaacATCAACTTTGTGGGCTGAGGCTGAGTGAAGACCTCGCAGAAGAGACCAGACCCAGCATGCTCCAGTAGCTCCACTGCAGGGGGTGGCTGCTTACGAGGACAGAGAGCAGAATTCAGACGACTCCAGCTGACCTACTTGGTGCAAGTCAAGTGAATACTAGTCGGGAGGGATTAGATGACTCAGCCTCTGCCTTCGTTGGAGTCAGGAAGTAGGCTTTGCAGTCCATTTCCTGGGGAATTTTCAGATGGACCAGTGATTTCATTTTCCTCTTCTAAAGCACCCCCATGCACAGGGAAAGGTTGTTCACGTGGCCATTTGGATGAAGCCAACGGATCTGATGTC…
FOSL2_1B	chr2	28498890	28499391	aagaaagaaaaaaaTGGGACTAATATGACAACAAGATTTTTACCTTCACAGTAAATAGTACAATTTAGCTGAGTAACTTGTGGAAGCTTGTTAGGTTGAAGTGACTCACTTGCGTAGATGAAGTTATTTTTAGAGATGTAATTTGTACTGTTTAGAAAAGAATAAAGAGATGGTAAAAGGCTAGATCGCTCATTATAGTTTACAGAGCTCATGAACCCAGCATCCATGCAAAAGATGACTAAGCAAGGGGTCGGTTGGTACTTTCTCTCAGAATTTTACAGATGTGAGTCATCCACTTTAGTCTGCAGACACAGCACCGAGATACCTGTGACTCAGCTCTCATTTAGAAAAAGCCCTAGAATTCAATTCTGATACACTTTTATAGTTAAGTAGTGAGGA…	CGCACTGGTCACGGAG	ACGTATGG	TWIST synthesis	-	>FOSL2_1B aagaaagaaaaaaaTGGGACTAATATGACAACAAGATTTTTACCTTCACAGTAAATAGTACAATTTAGCTGAGTAACTTGTGGAAGCTTGTTAGGTTGAAGTGACTCACTTGCGTAGATGAAGTTATTTTTAGAGATGTAATTTGTACTGTTTAGAAAAGAATAAAGAGATGGTAAAAGGCTAGATCGCTCATTATAGTTTACAGAGCTCATGAACCCAGCATCCATGCAAAAGATGACTAAGCAAGGGGTCGGTTGGTACTTTCTCTCAGAATTTTACAGATGTGAGTCATCCACTTTAGTCTGCAGACACAGCACCGAGATACCTGTGACTCAGCTCTCATTTAGAAAAAGCCCTAGAATTCAATTCTGATACACTTTTATAGTTAA…
SERPINE1_1A	chr7	100660281	100660782	AACCCCCCCCCAGGAGCCCCCGTAGAAGGACAGGTAGGGCATGAGGACCCCGATCTAGGAGGACGCAGGAAAAGAGGGGTCAGAGGTGCAGGGAGAGCCCCGGAGTCCAGAGAGTGAGTGGTTCTGCGGGACCAGGAAGTAAGTGATCGCTGTGCTCCGGGAGGATGCTGGAAGAAGATTCCAGACGCAGCTTTTTTGCCTGCTATGGTTACCGTTGCTATGAAGGAGGGCGGCCCTGCTGACCCAGAGCCAGCCCTGTCTCCCGCTCCACTCTGACCTCACCCCTGAGTCCAGGGCTGAACGCACGCTCCTCCGTGGCCCCCGCTTCCACCCCGTGCATGTGGGGGGCTTCTGCTCCGCTCCCTCCTGTTCCGGGGTCCAGCGGGCGGCTCCCCAGGC…	CGCACTGGTCACGGAG	GAGGACAA	TWIST synthesis	-	>SERPINE1_1A AACCCCCCCCCAGGAGCCCCCGTAGAAGGACAGGTAGGGCATGAGGACCCCGATCTAGGAGGACGCAGGAAAAGAGGGGTCAGAGGTGCAGGGAGAGCCCCGGAGTCCAGAGAGTGAGTGGTTCTGCGGGACCAGGAAGTAAGTGATCGCTGTGCTCCGGGAGGATGCTGGAAGAAGATTCCAGACGCAGCTTTTTTGCCTGCTATGGTTACCGTTGCTATGAAGGAGGGCGGCCCTGCTGACCCAGAGCCAGCCCTGTCTCCCGCTCCACTCTGACCTCACCCCTGAGTCCAGGGCTGAACGCACGCTCCTCCGTGGCCCCCGCTTCCACCCCGTGCATGTGGGGGGCTTCTGCTCCGCTCCCTCCTGTTCCGGGGTCCAGCGGG…
SERPINE1_1B	chr7	100660646	100661147	CCTGTTCCGGGGTCCAGCGGGCGGCTCCCCAGGCAGGCTCTGCACTTACCCGCAGCCCAGTGATGCAGGGTCGGAGGGGTGGTCGGCAGTGGGAAAGGGCGTAGGGCAGATGCCGGGCTGACTCTTCCTTTTGCCAGAGGAAATCCCCTCTGCCCCCTAGTCCTCCCCCTACCAAGGCTCCCATCACTCATCACGGCCTCTCCCTACAGACCAGAATCTGAGGGAGAGCAGATTCGGCCTTGAGAACGCCTACAACAACTTCCGGCCCACCCTGGAGACTGTTGACTCTGGCACAGAGGTGACTCAGCTGCGAGCTGCCCCCACCCCCTGAGGCTGCTCCACTTCCTCTGGGGTTCCCTCTTCCCCCGGGACTCCCTTCTCCCCCTGGGACTCCCTTCT…	CGCACTGGTCACGGAG	AAGAATCG	PCR amplification	-	>SERPINE1_1B CCTGTTCCGGGGTCCAGCGGGCGGCTCCCCAGGCAGGCTCTGCACTTACCCGCAGCCCAGTGATGCAGGGTCGGAGGGGTGGTCGGCAGTGGGAAAGGGCGTAGGGCAGATGCCGGGCTGACTCTTCCTTTTGCCAGAGGAAATCCCCTCTGCCCCCTAGTCCTCCCCCTACCAAGGCTCCCATCACTCATCACGGCCTCTCCCTACAGACCAGAATCTGAGGGAGAGCAGATTCGGCCTTGAGAACGCCTACAACAACTTCCGGCCCACCCTGGAGACTGTTGACTCTGGCACAGAGGTGACTCAGCTGCGAGCTGCCCCCACCCCCTGAGGCTGCTCCACTTCCTCTGGGGTTCCCTCTTCCCCCGGGACTCCCTTCTCCCCCT…
SERPINE1_2	chr7	100743371	100743872	GGAATTTTGACCTAAGGGGGGTGCTCAGAGACACACCATGCACCCTGCTGGCATCCTGTTCAAGGCCCCCAAGACGGAGATGGAGAGACACAATGACAAGCGGGGAGGGAATGCTTTGAATGGCTTGGCGGGGGAGAGGGCCCTCGGCTGCCGGTGACAGCCTGAATAAGAATTCTGCAATTCATCCTCTGATGACTCAGCTAGTTGGACCGGCGCCTCTGCCAACCCTGGGGAGCATGAGTCAGCAGCTGAGGGGGCCGATGGCAGGAGAGATCGCTGTGGTCCATGTGAGCAGTGACTGTAGGGAGAACGGCCTGTTCCCAGCTCCTAACCCCAAGGCGGAGCATCTGCCTCTGCGGTCGGACACACACGGGCCTCAGGTTCTTAGCCATGTGGCCA…	CGCACTGGTCACGGAG	ACGAGTCC	PCR failled	-	>SERPINE1_2 GGAATTTTGACCTAAGGGGGGTGCTCAGAGACACACCATGCACCCTGCTGGCATCCTGTTCAAGGCCCCCAAGACGGAGATGGAGAGACACAATGACAAGCGGGGAGGGAATGCTTTGAATGGCTTGGCGGGGGAGAGGGCCCTCGGCTGCCGGTGACAGCCTGAATAAGAATTCTGCAATTCATCCTCTGATGACTCAGCTAGTTGGACCGGCGCCTCTGCCAACCCTGGGGAGCATGAGTCAGCAGCTGAGGGGGCCGATGGCAGGAGAGATCGCTGTGGTCCATGTGAGCAGTGACTGTAGGGAGAACGGCCTGTTCCCAGCTCCTAACCCCAAGGCGGAGCATCTGCCTCTGCGGTCGGACACACACGGGCCTCAGGTTCTTA…
SERPINE1_6	chr7	100765159	100765660	aaaaaataaaaaaaGGCGGTGGAGACACCCAGCACTGGTTCCCTCCTAGAGAAGGGGAGAGAGCCGAGCCCAAACACAGGCTATTTTTGGAGTTGTGTTGTTTGGAGAGCAACCAAGCCAGAAATAGTGCTGTTAGCAAGACCCTGCCTTCTCCAACCCCCGGCTCTCCCAGTGAAATCACCAGGAATCAGGGAGGCTGGGCCCCACATTCCAGGGAGCCTGTGTAACAGGCAGTGCTCTCTTCCCCACCGGAAGGGCTTGGGAGCTGAGCATTTGACTGTAAAAGGGATTCTGGGATTCCAGAGGGACAGAGGGACTGAGTCagagagagagagagagagagagTGGAAATGGGGGGCAACCTCCTGCAGCGGAggagaggggacaggagggaaggct…	CGCACTGGTCACGGAG	CATACTGT	TWIST synthesis	A replaced by T to break polyA in position 7	>SERPINE1_6 aaaaaataaaaaaaGGCGGTGGAGACACCCAGCACTGGTTCCCTCCTAGAGAAGGGGAGAGAGCCGAGCCCAAACACAGGCTATTTTTGGAGTTGTGTTGTTTGGAGAGCAACCAAGCCAGAAATAGTGCTGTTAGCAAGACCCTGCCTTCTCCAACCCCCGGCTCTCCCAGTGAAATCACCAGGAATCAGGGAGGCTGGGCCCCACATTCCAGGGAGCCTGTGTAACAGGCAGTGCTCTCTTCCCCACCGGAAGGGCTTGGGAGCTGAGCATTTGACTGTAAAAGGGATTCTGGGATTCCAGAGGGACAGAGGGACTGAGTCagagagagagagagagagagagTGGAAATGGGGGGCAACCTCCTGCAGCGGAggagaggggaca…
FGF2_1A	chr4	123685966	123686467	AGGCTCTATGAATTTAGTTCTTTCTCACTTTCTTTATATGCTCTGGGGTTTTATCACTTCATTGCCTCTTTTAATATTTCTCTAGTTTCACTCATATGTCTAAGACTTTTCATTTCCAGAAATGACTACGATATTGTGAGGCTCTAGAAAATGTCCACTTCATTTGCAATATGTTTGTAAGCTAAGACAGTATGGTTCAACATTGTTCAACATTGACTCCTCTGGTTCCAGGATTACCTCTTTAGAATTGAGTCATTTAGCATTGCCACTGATTTCATAATCTCTCTTTTTGCATGCAATCCATTTCCTTTGAAATCTTTTTGTGAATTTCCAGAGCCCCTTCTTATTCCATTACTTATCCCATTCCAAGACTATGCCTTTGTATTCTTACATCTAAGG…	CGCACTGGTCACGGAG	CCACGACT	TWIST synthesis	-	>FGF2_1A AGGCTCTATGAATTTAGTTCTTTCTCACTTTCTTTATATGCTCTGGGGTTTTATCACTTCATTGCCTCTTTTAATATTTCTCTAGTTTCACTCATATGTCTAAGACTTTTCATTTCCAGAAATGACTACGATATTGTGAGGCTCTAGAAAATGTCCACTTCATTTGCAATATGTTTGTAAGCTAAGACAGTATGGTTCAACATTGTTCAACATTGACTCCTCTGGTTCCAGGATTACCTCTTTAGAATTGAGTCATTTAGCATTGCCACTGATTTCATAATCTCTCTTTTTGCATGCAATCCATTTCCTTTGAAATCTTTTTGTGAATTTCCAGAGCCCCTTCTTATTCCATTACTTATCCCATTCCAAGACTATGCCTTTGTATTCTTA…
FGF2_1B	chr4	123686797	123687298	TGATTTTTATTTCACAATTCTTTGTCACTTTATCGTGCTTAACTTACATCTTTTTTTCTGAGATAtgtgtgtgtatgtatatatctgtgtgtgtatgtgtatatgtgtgtgtgCATATATATAAACATATATATACtttttttttcttttttgaaaagacaagctctttcttgctctgtcacccaggctggagtgcagtggcgtgatctctgctcactgcaacctctgcctcctcagttcaagccagttttgtgactcagcctctgtctggagtagttgagattataagtgtgcctcaccatgactacgcctggctaatttttgtatttttagcagagatggggtttgacccatgttggtcaggccagtctcgaactcctggcctcaagtgatccaccc…	CGCACTGGTCACGGAG	TCGTCGGT	TWIST synthesis	-	>FGF2_1B TGATTTTTATTTCACAATTCTTTGTCACTTTATCGTGCTTAACTTACATCTTTTTTTCTGAGATAtgtgtgtgtatgtatatatctgtgtgtgtatgtgtatatgtgtgtgtgCATATATATAAACATATATATACtttttttttcttttttgaaaagacaagctctttcttgctctgtcacccaggctggagtgcagtggcgtgatctctgctcactgcaacctctgcctcctcagttcaagccagttttgtgactcagcctctgtctggagtagttgagattataagtgtgcctcaccatgactacgcctggctaatttttgtatttttagcagagatggggtttgacccatgttggtcaggccagtctcgaactcctggcctcaagt…
FGF2_2	chr4	123704400	123704901	gggaaaggaaaggagaaaagaaaAGGGCAGAAAATATGTAACACACCTTAGAAAAATTTGTAACTCAAAGGACTAAAATGTTTATCAAAGCACTGTGCTAGAGCTTGCTGGCCAGTTTACACTCTGTATTGGTCAGTTCTTCTGTATAGAGGTTTCATAAAAAGTCAAATGCGCATTCCTCACTGTTGCCATTGCCAAAATTCCTAAAATTCCTGTCCACACTAATAGGAGCTATTGTCATCCTAATGACTCTAGCTCCACCAGGGATCCAGAGCCAAGGATGCCAAACTAGTGACACAGAGGCAGCTAGTGCTGCCCGTGCTTTCCCCTCAGTACCCAGGGCCCTCGCCTTGCTGTGTGCCTGCCAGGTCTTGCTGCTATCATCTCCTTTTCACCCCA…	CGCACTGGTCACGGAG	TTACGTCC	TWIST synthesis	-	>FGF2_2 gggaaaggaaaggagaaaagaaaAGGGCAGAAAATATGTAACACACCTTAGAAAAATTTGTAACTCAAAGGACTAAAATGTTTATCAAAGCACTGTGCTAGAGCTTGCTGGCCAGTTTACACTCTGTATTGGTCAGTTCTTCTGTATAGAGGTTTCATAAAAAGTCAAATGCGCATTCCTCACTGTTGCCATTGCCAAAATTCCTAAAATTCCTGTCCACACTAATAGGAGCTATTGTCATCCTAATGACTCTAGCTCCACCAGGGATCCAGAGCCAAGGATGCCAAACTAGTGACACAGAGGCAGCTAGTGCTGCCCGTGCTTTCCCCTCAGTACCCAGGGCCCTCGCCTTGCTGTGTGCCTGCCAGGTCTTGCTGCTATCATCTCCTTT…
FLNC_1A	chr7	128467475	128467976	CCAGCCAGCACTGCCCAGATACTCAGCTGATGAAACCCCTTGTAACCCCCTGTGTGCCCCTGCCTGGCTTGGGGAGGAGCATGTCAGCGCTCCTCGGGGAGGGGGCCCTACTTGGCAGGCCGGGCCCAGCATTGTGCACGGTCTGTTCCAGCCTGGCTGGCCAGGCCCAGGGCCTGGGCTCATGGGCTATATTGAGGGCTGAGTCACCAGCCCGCGCCTGGGTCAGGCTGAGTGTCACTGGCTGCTGGGGCCTGAGTCAGGCCCCGATTTATCCTGGAGAGCAACAGGCTCAGGTTTCTGAGGACGGTTGCGGGGGGTGACGGGAATCATCCTTTGGCACTCTGTACCCTCCTCTCCTCTGCCAACCATTCACTTGATCCCCTGGGACCCGCACACTGA…	CGCACTGGTCACGGAG	AGGTGTCT	TWIST synthesis	-	>FLNC_1A CCAGCCAGCACTGCCCAGATACTCAGCTGATGAAACCCCTTGTAACCCCCTGTGTGCCCCTGCCTGGCTTGGGGAGGAGCATGTCAGCGCTCCTCGGGGAGGGGGCCCTACTTGGCAGGCCGGGCCCAGCATTGTGCACGGTCTGTTCCAGCCTGGCTGGCCAGGCCCAGGGCCTGGGCTCATGGGCTATATTGAGGGCTGAGTCACCAGCCCGCGCCTGGGTCAGGCTGAGTGTCACTGGCTGCTGGGGCCTGAGTCAGGCCCCGATTTATCCTGGAGAGCAACAGGCTCAGGTTTCTGAGGACGGTTGCGGGGGGTGACGGGAATCATCCTTTGGCACTCTGTACCCTCCTCTCCTCTGCCAACCATTCACTTGATCCCCTGGGACCC…
FLNC_1B	chr7	128468145	128468646	CTCACCAGGGATTCAGAGGCAGCACTGCTGAACCCTGAGCCCTTGGCACATCAGGTTGGCTGTCAGAAGTCGGCCTTTGTACATACACAGTTCCCTTGTGAGGCCCAGCTGCGTGTCCTAGGAGCGGGGCCTCTCTCCACAGCAGAGCTCAGCCTCTCAAGTGTATGGACAGCACGGGTGCCTGATGGGTGGATTTAGCCATGAGTTGAAGGTGGCTTGGGGAGAATGAGAGTTCTAGAGATAGGGAGAAGGGGTTGCCAATAGGAGAGTGGAATTCCTGAGCACCTCGTCACAGGCAGCCGACAGAACATGAGCCGCAGGGCCCAGGCTATTTATACCTCGCCTGTCACTATCAGGGTCCCCACAGCTCCCCCCACCTCCAGCCACACACAGCAGGTC…	CGCACTGGTCACGGAG	GTTAGCCA	TWIST synthesis	-	>FLNC_1B CTCACCAGGGATTCAGAGGCAGCACTGCTGAACCCTGAGCCCTTGGCACATCAGGTTGGCTGTCAGAAGTCGGCCTTTGTACATACACAGTTCCCTTGTGAGGCCCAGCTGCGTGTCCTAGGAGCGGGGCCTCTCTCCACAGCAGAGCTCAGCCTCTCAAGTGTATGGACAGCACGGGTGCCTGATGGGTGGATTTAGCCATGAGTTGAAGGTGGCTTGGGGAGAATGAGAGTTCTAGAGATAGGGAGAAGGGGTTGCCAATAGGAGAGTGGAATTCCTGAGCACCTCGTCACAGGCAGCCGACAGAACATGAGCCGCAGGGCCCAGGCTATTTATACCTCGCCTGTCACTATCAGGGTCCCCACAGCTCCCCCCACCTCCAGCCACACA…
HEG1_1	chr3	124704966	124705467	AGTAGAAAGTGCACAGAAACTTTTGAGGGGTGGGACATAGGTTATGCCTAATGCCAAAATCTACTGGAGTTGGATGATGTGTGCTTGGCTGGAAAAAGCCAGCCTCCCCAGCCTCATTGGGCTTGGGTAGAGCATGTGCCCTAAAAAGCCTGCATAGAGAAGAAGCATTTCTTGCCTACGAAAAATCCAGCCTGAGTCACAGCCCCAGGAAGGCCCCTGCTGTCTTGGGTGGCAATAATGGGAGTAATAGCGGTGGGCAGTCAGAGCCCTGCTATTTGGCACAAAACGTTGAGTGATGAGTCACAGACTCCCAATATGCTATCACCATAGAGAGGGATGAATTCCCAACTCCTTAACCAACACCCAGGTCTTGGCCCAGACCTCAGAGAAAGAGGCAGG…	CGCACTGGTCACGGAG	AGACGCTT	TWIST synthesis	-	>HEG1_1 AGTAGAAAGTGCACAGAAACTTTTGAGGGGTGGGACATAGGTTATGCCTAATGCCAAAATCTACTGGAGTTGGATGATGTGTGCTTGGCTGGAAAAAGCCAGCCTCCCCAGCCTCATTGGGCTTGGGTAGAGCATGTGCCCTAAAAAGCCTGCATAGAGAAGAAGCATTTCTTGCCTACGAAAAATCCAGCCTGAGTCACAGCCCCAGGAAGGCCCCTGCTGTCTTGGGTGGCAATAATGGGAGTAATAGCGGTGGGCAGTCAGAGCCCTGCTATTTGGCACAAAACGTTGAGTGATGAGTCACAGACTCCCAATATGCTATCACCATAGAGAGGGATGAATTCCCAACTCCTTAACCAACACCCAGGTCTTGGCCCAGACCTCAGAGAAA…
BLK_3	chr8	11338358	11338859	CCCAGTGAGTTAGGAGATTCCAAGATCTTCTGGGGGCCTCCAGGCTTCCCTGTCCCATCCAGAACCTCTCTCACCTCCCCAGAGAGAACCCCCCCCACCCATGCCAACGTCCGCAGCCACCACACCTCCCCAGCCCACCCCAGCTCCAGCCACACCCTCCTGCTCCTGGAGTTTGGTTTGTGTCCATCGAGTGATGCTGGCTCAGTCTCGGCTTCTGGTGCTGCCCTGGGCGAGGCCAGGACTCTCCTAGGCATTCAGGCCTGAAAGAGCTTCCCTTGACTCAGCCATGACTCACCAGGGGTGGGCCCTACCAGGGCGGGGTGGCCCCCTGAGGGGTCTTGGGATGGCCTGGAGTTTCTGAGCTATAAACATTGCCATTTAAATTATTGAAATTACTGA…	CGCACTGGTCACGGAG	CGTGCCAA	PCR amplification	-	>BLK_3 CCCAGTGAGTTAGGAGATTCCAAGATCTTCTGGGGGCCTCCAGGCTTCCCTGTCCCATCCAGAACCTCTCTCACCTCCCCAGAGAGAACCCCCCCCACCCATGCCAACGTCCGCAGCCACCACACCTCCCCAGCCCACCCCAGCTCCAGCCACACCCTCCTGCTCCTGGAGTTTGGTTTGTGTCCATCGAGTGATGCTGGCTCAGTCTCGGCTTCTGGTGCTGCCCTGGGCGAGGCCAGGACTCTCCTAGGCATTCAGGCCTGAAAGAGCTTCCCTTGACTCAGCCATGACTCACCAGGGGTGGGCCCTACCAGGGCGGGGTGGCCCCCTGAGGGGTCTTGGGATGGCCTGGAGTTTCTGAGCTATAAACATTGCCATTTAAATTATTGAAA…
BLK_5	chr8	11373352	11373853	ttcatgaaatcaagtgggctcctgctggcattttaaaaacaaaatcatatagaatagagaatacccaggggcattgcctgtaggaaaggctttgggaggcttttgtatcCTGGTGTGGGGATGGGTGTGCACTCGCGTGCCTGGGATGTCAGGCACTGTagatggaacaaaagttcatgcccagatgaactgataagcagatcgtggcctgtacattccatggaataccactcagcctttgaaaggaaggaaattccttcacatactgctacatggatgaaccacgaagacatgacgctaagaggagagagtcagacacaaaggagaaacactgcaattccatttaaatgagtccctggagtagtcccattcagagaacagaaagtagaacgggggtgc…	CGCACTGGTCACGGAG	GACACCTA	TWIST synthesis	-	>BLK_5 ttcatgaaatcaagtgggctcctgctggcattttaaaaacaaaatcatatagaatagagaatacccaggggcattgcctgtaggaaaggctttgggaggcttttgtatcCTGGTGTGGGGATGGGTGTGCACTCGCGTGCCTGGGATGTCAGGCACTGTagatggaacaaaagttcatgcccagatgaactgataagcagatcgtggcctgtacattccatggaataccactcagcctttgaaaggaaggaaattccttcacatactgctacatggatgaaccacgaagacatgacgctaagaggagagagtcagacacaaaggagaaacactgcaattccatttaaatgagtccctggagtagtcccattcagagaacagaaagtagaacg…
COL1A2_1	chr7	93930265	93930766	GTGTTTCTCTGTTCTGTACAGGGAAATTTGAGTAAACGATTGACTTTTCACTGAAATTTAGGTTTCCTAATGACCCCCACATAAATAATGCAGCTAGAAATTACTGAGGACTAGCCCAGTCGCTTGGTGGCTAGCACTTTCCCCTCCCTTCAGCGGTATCCCTGCATTGTGCCTTTAAGGCAGCAGGGGCTCACTAGCTCCTCGGGCTGAACTCTGCCCTCCCTGGGCAGTGACTCACACTCTGCAGGCTCAGACAAATGGAATCTCCCCCTGTGAGAGCCCTGCAGCCTTCCACTGTGAAAAGTCATCACAGGGCCTGAAGGGAATATTTCCCCCACTTCCAACCTCCAAGCTCTGAGGCCACAAGTGTTTTTCACTGAGAGGGCCAGAATGTTCTAA…	CGCACTGGTCACGGAG	GCAGTGTG	TWIST synthesis	-	>COL1A2_1 GTGTTTCTCTGTTCTGTACAGGGAAATTTGAGTAAACGATTGACTTTTCACTGAAATTTAGGTTTCCTAATGACCCCCACATAAATAATGCAGCTAGAAATTACTGAGGACTAGCCCAGTCGCTTGGTGGCTAGCACTTTCCCCTCCCTTCAGCGGTATCCCTGCATTGTGCCTTTAAGGCAGCAGGGGCTCACTAGCTCCTCGGGCTGAACTCTGCCCTCCCTGGGCAGTGACTCACACTCTGCAGGCTCAGACAAATGGAATCTCCCCCTGTGAGAGCCCTGCAGCCTTCCACTGTGAAAAGTCATCACAGGGCCTGAAGGGAATATTTCCCCCACTTCCAACCTCCAAGCTCTGAGGCCACAAGTGTTTTTCACTGAGAGGGCCAG…
COL5A1_1	chr9	137394577	137395078	CGTGTCCTCGCCCTCCTGCCCTCTGCCTTCGTTCTCTGTCTCATGTGGGGGTGTCCATGGACGAGCCCCCTTCCAGGACGGGCCAGGAGGACCGTGAGCAGCGGGGCCACGTGGCTGGGGAGCAGGCTTGGTGCCTCTCTGTCGCTCAGGCCAGGAGCTCTCCCTGGATCCTGCTGCTGTTGCCTGCAGCTGGGCCTGAGCCAGGGAGGCCATCCTGGGGCCCAGGGGCAGGCTTGAGGTGGGGACGTGGCATCCGCAGCCCTGGCTGGCCTTGTCTGTGGGAGGCCTAGCCAGGGCTGAGTCATCAGGAGCTGGGAGCTGAGCAGACCAGGCCCAGCTGTCTGGAGAGTCTGGGCTTATCCCTGCGTTGTGACGAAATCACGGCGCAGAAGCCCGGGA…	CGCACTGGTCACGGAG	CAGAGGTT	PCR amplification	-	>COL5A1_1 CGTGTCCTCGCCCTCCTGCCCTCTGCCTTCGTTCTCTGTCTCATGTGGGGGTGTCCATGGACGAGCCCCCTTCCAGGACGGGCCAGGAGGACCGTGAGCAGCGGGGCCACGTGGCTGGGGAGCAGGCTTGGTGCCTCTCTGTCGCTCAGGCCAGGAGCTCTCCCTGGATCCTGCTGCTGTTGCCTGCAGCTGGGCCTGAGCCAGGGAGGCCATCCTGGGGCCCAGGGGCAGGCTTGAGGTGGGGACGTGGCATCCGCAGCCCTGGCTGGCCTTGTCTGTGGGAGGCCTAGCCAGGGCTGAGTCATCAGGAGCTGGGAGCTGAGCAGACCAGGCCCAGCTGTCTGGAGAGTCTGGGCTTATCCCTGCGTTGTGACGAAATCACGGCGCAG…
COL5A1_2	chr9	137443783	137444284	AGCCTTCTCTGCCTTGTTTCACGCCGGCCAGTGGCTGGTCTAGGAGGGATCCTTCCCCCACCCCCCACCCCAAGTCTATTTCAGACCCACCTCCTGCTGACTCTGCTCCATCGAGAAGAGCTATAAATCAGCCTTCCTTCTGGGGTGATTATAAAAATCACTCTATTAGCAGTTGACTCACAGTCTAAAAATGTGCTCATGGCATAGTTGTGGCCACTGAGCCTGGTTCGGTGGGACAGGCCCCAAGCCCCAGCCCGCGCCTTTCTGCAGGAGGACTTCCCTTTCCAAGCACGCGCGCTGCCGCCAGAGCCTTCCGGCCGACCCGCCGCGGTGCCCTTCCTAGCGACGGCCTGTGATGTTCCTTAGCCACGGGGCTTGGCCCAGACCCGCTAGAGGGGG…	CGCACTGGTCACGGAG	TTCAGTGG	TWIST synthesis	-	>COL5A1_2 AGCCTTCTCTGCCTTGTTTCACGCCGGCCAGTGGCTGGTCTAGGAGGGATCCTTCCCCCACCCCCCACCCCAAGTCTATTTCAGACCCACCTCCTGCTGACTCTGCTCCATCGAGAAGAGCTATAAATCAGCCTTCCTTCTGGGGTGATTATAAAAATCACTCTATTAGCAGTTGACTCACAGTCTAAAAATGTGCTCATGGCATAGTTGTGGCCACTGAGCCTGGTTCGGTGGGACAGGCCCCAAGCCCCAGCCCGCGCCTTTCTGCAGGAGGACTTCCCTTTCCAAGCACGCGCGCTGCCGCCAGAGCCTTCCGGCCGACCCGCCGCGGTGCCCTTCCTAGCGACGGCCTGTGATGTTCCTTAGCCACGGGGCTTGGCCCAGACCCG…
COL5A1_3	chr9	137484141	137484642	GCCAGCCTCGGCCTCTCTCTGCGGCTGGCGGTTTGAGCAGAGTTGGGTTTTGAGAACAAAACAAAAGTTTCTTCATTTCAGATGTTCACTAATTCAAACTGGCCCTGGGCCCATGGGTGGTGCATTTCTGAGGACTTTGTCTGCGACCGGGCTCCCTGCCCCCTCCCAGGGCCTCCCCTTTCATGCGTTGTGGGGTTTGGGGAGCAGCGGCCTTCTCCTGCCTCCGTGGACAAGCGTGTAATGACAGAGCCACATCTGTGCTGACTCACTGTGCAAACATCTTCCACTGGCCTCACTGCCCCTCCCGGCCTGGCCTCCAGGCCCCCCTGGGGTTCCTAGACTCAGGCCACGCTTGTGCATCACTAGGCCCGGGACTCAGCGTTCTTAGACGGGGGTCCC…	CGCACTGGTCACGGAG	GCTAAGAC	TWIST synthesis	-	>COL5A1_3 GCCAGCCTCGGCCTCTCTCTGCGGCTGGCGGTTTGAGCAGAGTTGGGTTTTGAGAACAAAACAAAAGTTTCTTCATTTCAGATGTTCACTAATTCAAACTGGCCCTGGGCCCATGGGTGGTGCATTTCTGAGGACTTTGTCTGCGACCGGGCTCCCTGCCCCCTCCCAGGGCCTCCCCTTTCATGCGTTGTGGGGTTTGGGGAGCAGCGGCCTTCTCCTGCCTCCGTGGACAAGCGTGTAATGACAGAGCCACATCTGTGCTGACTCACTGTGCAAACATCTTCCACTGGCCTCACTGCCCCTCCCGGCCTGGCCTCCAGGCCCCCCTGGGGTTCCTAGACTCAGGCCACGCTTGTGCATCACTAGGCCCGGGACTCAGCGTTCTTAGA…
COL5A1_4	chr9	137494362	137494863	AAGTCCCATCCTTAGCTTGATGGCCCCCACCCCCACCCTGTCCCCAGATAGTGCCTATGGGGAAGCCTCGGGAAGGAACACTGCCCTTCCCCCTGCCCCGACACCACATCTGGGATGAGCCCCAAACCTCAGTTGGCTTTGATGCTGCAACTTTTTCCAAACCCTGAGCATGATTCACAGCCCAGACCGGCAGTGGAATTTCTGCAAACAGAGCCGGGGGCTCCGTCTGCGCTCTTGAGAGGTCCGCAGCTCCCACCTTCGGAATGGCCCGAGAAAGAGACTGGGAACGCGCGAGCCACATTCTTCCTGGATGAAACACTGGCCTTATCAGGAGGAAGTAATGACAAATGGCCTGAGCAGCTCCCAGCCAGGGGGCTGGCTCTTCTTAAATTTGCTTAG…	CGCACTGGTCACGGAG	TGGTTATC	TWIST synthesis	-	>COL5A1_4 AAGTCCCATCCTTAGCTTGATGGCCCCCACCCCCACCCTGTCCCCAGATAGTGCCTATGGGGAAGCCTCGGGAAGGAACACTGCCCTTCCCCCTGCCCCGACACCACATCTGGGATGAGCCCCAAACCTCAGTTGGCTTTGATGCTGCAACTTTTTCCAAACCCTGAGCATGATTCACAGCCCAGACCGGCAGTGGAATTTCTGCAAACAGAGCCGGGGGCTCCGTCTGCGCTCTTGAGAGGTCCGCAGCTCCCACCTTCGGAATGGCCCGAGAAAGAGACTGGGAACGCGCGAGCCACATTCTTCCTGGATGAAACACTGGCCTTATCAGGAGGAAGTAATGACAAATGGCCTGAGCAGCTCCCAGCCAGGGGGCTGGCTCTTCTTAA…
COL5A1_5	chr9	137516629	137517130	ACTGCCCGACTGGGTGCCTCTTCCTGGGTCCTGCTCTCGCTTGCCCCAGCCTCTGCAGCTCAGGGCCCACCATCTACCTGAAGTTCTGCACGCCAGCATGCCCCTGAGTCACCAGCTGGCCCTGCCAGTGGGGCTAGGGTGTGAGGCATGTCTGTTGACCTCCCCACACTCTGGTCATTGAAAACAGTCTCTCTGCAGAGGAGGGGAGCTGTCTCAGTCCCTCCAGACACCCACCCGCCAGCACCATTGCTCATCACTGGGAGGGACTGAGTTTCCTGCAATTGAGTCATGCAGCCTGGAGGGTACAGTGGACGGGGCACAGCCTTTCTGGAGAGTAAGTCTCATTCCAAAGAGGAGGAGGGAAAGTAGGTCAGTCATTTGGATTTGGCAATGAATGGA…	CGCACTGGTCACGGAG	TGGTGTGG	TWIST synthesis	-	>COL5A1_5 ACTGCCCGACTGGGTGCCTCTTCCTGGGTCCTGCTCTCGCTTGCCCCAGCCTCTGCAGCTCAGGGCCCACCATCTACCTGAAGTTCTGCACGCCAGCATGCCCCTGAGTCACCAGCTGGCCCTGCCAGTGGGGCTAGGGTGTGAGGCATGTCTGTTGACCTCCCCACACTCTGGTCATTGAAAACAGTCTCTCTGCAGAGGAGGGGAGCTGTCTCAGTCCCTCCAGACACCCACCCGCCAGCACCATTGCTCATCACTGGGAGGGACTGAGTTTCCTGCAATTGAGTCATGCAGCCTGGAGGGTACAGTGGACGGGGCACAGCCTTTCTGGAGAGTAAGTCTCATTCCAAAGAGGAGGAGGGAAAGTAGGTCAGTCATTTGGATTTGGC…
COL5A1_8	chr9	137553926	137554427	TTACTGGGCTCTAAGTATGTGCCTTTCTCCATAAAATGTGATGCCTGGTCAATATCTTGGCCaaaaataaaaaaaataaaaaaTTCCTCTGAAGGAGGGTAGTCTGGTCTCTTTCTAGTCACTTGTGAAAATATTTCCTGATCTGATCTCTGCAGTCGTGTACGCGGCCAGCACATAACTGCCCCCAGGCAGGGCCCTGACTTCCAGGCCGCTCAGGGCAGCTACCCTCCCTGGGATATGTCAAGCTGAGGGCTTCGCACATTCTTCTCTGACAACTCAGCTGGTTTCCAGCCCAGTCCGGCTGCCTCCTTCTTTTCCACTTTGACTTTCCTAACAGCCTGGGAAGCTCTGAAGCCTGTGTTTTCAGGCCTGCCGGTGCCAGTGGAGCTGGCCTAGGCC…	CGCACTGGTCACGGAG	GCGACCAT	TWIST synthesis	A replaced by T to break polyA in position 68 and 77	>COL5A1_8 TTACTGGGCTCTAAGTATGTGCCTTTCTCCATAAAATGTGATGCCTGGTCAATATCTTGGCCaaaaataaaaaaaataaaaaaTTCCTCTGAAGGAGGGTAGTCTGGTCTCTTTCTAGTCACTTGTGAAAATATTTCCTGATCTGATCTCTGCAGTCGTGTACGCGGCCAGCACATAACTGCCCCCAGGCAGGGCCCTGACTTCCAGGCCGCTCAGGGCAGCTACCCTCCCTGGGATATGTCAAGCTGAGGGCTTCGCACATTCTTCTCTGACAACTCAGCTGGTTTCCAGCCCAGTCCGGCTGCCTCCTTCTTTTCCACTTTGACTTTCCTAACAGCCTGGGAAGCTCTGAAGCCTGTGTTTTCAGGCCTGCCGGTGCCAGTGGAGCT…
ALPK_2	chr18	56251412	56251913	TACAGTCAATGAAGAGAAAAGGGAACTGGATTAAGTATAATTAACTTCTCACTGGCTAATGAGTGCCTTTGAAAGAGTTATGATTTGTGGCTGACACGTCTTTGCTAATTATCTCGAAGCATCCTAAAGAAGAGGGGAAGAAAATCGGGCAAGGAAGCCAGCATCTGCTGGGTGACTCCTACATTAAACAATGTCTGCCTCCTCCCTGTGGGCAaaactgaggttgaaaggagttatttccccaaagtgacaaagctggaaagccatagagccgggatAAGAAAGAGCCTTCTGCCCTGGCTGCCTGGCTCTGTGGTTGCTGTTAGAAAACTAACATTACCAGAAAGGAAACGACACAGTGTAGAGATCATTCTGCAAATAAAGTGTTTCTGTCCTAAG…	CGCACTGGTCACGGAG	CTTCGCTC	TWIST synthesis	-	>ALPK_2 TACAGTCAATGAAGAGAAAAGGGAACTGGATTAAGTATAATTAACTTCTCACTGGCTAATGAGTGCCTTTGAAAGAGTTATGATTTGTGGCTGACACGTCTTTGCTAATTATCTCGAAGCATCCTAAAGAAGAGGGGAAGAAAATCGGGCAAGGAAGCCAGCATCTGCTGGGTGACTCCTACATTAAACAATGTCTGCCTCCTCCCTGTGGGCAaaactgaggttgaaaggagttatttccccaaagtgacaaagctggaaagccatagagccgggatAAGAAAGAGCCTTCTGCCCTGGCTGCCTGGCTCTGTGGTTGCTGTTAGAAAACTAACATTACCAGAAAGGAAACGACACAGTGTAGAGATCATTCTGCAAATAAAGTGTTTCT…
AXL_2	chr19	41729368	41729869	CTCCCTACTGAAGGAGGAAAGACAGAGGAGCAGATGGCAGAGGCTCTGTAAAGGAAGGAGGCTGCAGCCTGGAGGGCATCAGCTTCCCGCACTCCCAACCTGCTGCCTCTCTCTGCTGGAATGAGGAGGGGCCTTCTGACTGGGGGTCTCCAGGGTGGAGGGAGGAGCTCACATTCTCAGCATTCCTGGGACCCTGAGTTGCAAGGAAGACCTGGTGAGCATGCTGACCCCAGAGGAGTGACTCAGGCCCATGGCTCGAGTGGCTGAGTAGGGACCAGGGTTGGGGATCGGGCATGAGTCAGCCTGGCAGGTCCCATGAGAAGGGGAGGGGAGGGAGAGAAATGGGGGCTGCACAGGTGTGAGGATCTGTGCATGTCTGTGTGGTGGTGGTGGGGTGTC…	CGCACTGGTCACGGAG	CGCGGAAT	TWIST synthesis	-	>AXL_2 CTCCCTACTGAAGGAGGAAAGACAGAGGAGCAGATGGCAGAGGCTCTGTAAAGGAAGGAGGCTGCAGCCTGGAGGGCATCAGCTTCCCGCACTCCCAACCTGCTGCCTCTCTCTGCTGGAATGAGGAGGGGCCTTCTGACTGGGGGTCTCCAGGGTGGAGGGAGGAGCTCACATTCTCAGCATTCCTGGGACCCTGAGTTGCAAGGAAGACCTGGTGAGCATGCTGACCCCAGAGGAGTGACTCAGGCCCATGGCTCGAGTGGCTGAGTAGGGACCAGGGTTGGGGATCGGGCATGAGTCAGCCTGGCAGGTCCCATGAGAAGGGGAGGGGAGGGAGAGAAATGGGGGCTGCACAGGTGTGAGGATCTGTGCATGTCTGTGTGGTGGTGGTG…
ABCC3_1	chr17	48739114	48739615	agaaaccagcgtgtaaatcaattagaattcagtgggggcagaagtgttctcgggtgtctggaaaaccccgggaggggcaaagaagccagcctgggatgcagcaggaagcacccactggcttgggaggtcaacgaatttggagagacAAGTAGGTGAAGAAACAGGGGAAAGTTCAGCCTCAGCTTAGTCACAAAGCCCTGAAACAGCATGACTCAGGTGTTTCTGAGTGGCAGAGGAAATGGCAACGAGAGGGAGGGGCAGGAAAACAGAGAGAGGGAGAGCTAAGGATATCCTTGAAAGATCTGAGCCAGGGAGGGGCATCTGGCTTCAAGGATCTCCTGCCAGGAGTGTGGGGGATGTAGGGCAGGGTGGCTGGATGGAAGTGGGCCAACCCGGTCA…	CGCACTGGTCACGGAG	AATGCCTT	TWIST synthesis	-	>ABCC3_1 agaaaccagcgtgtaaatcaattagaattcagtgggggcagaagtgttctcgggtgtctggaaaaccccgggaggggcaaagaagccagcctgggatgcagcaggaagcacccactggcttgggaggtcaacgaatttggagagacAAGTAGGTGAAGAAACAGGGGAAAGTTCAGCCTCAGCTTAGTCACAAAGCCCTGAAACAGCATGACTCAGGTGTTTCTGAGTGGCAGAGGAAATGGCAACGAGAGGGAGGGGCAGGAAAACAGAGAGAGGGAGAGCTAAGGATATCCTTGAAAGATCTGAGCCAGGGAGGGGCATCTGGCTTCAAGGATCTCCTGCCAGGAGTGTGGGGGATGTAGGGCAGGGTGGCTGGATGGAAGTGGGCCA…
GPR39_1	chr2	133173861	133174362	CGGTGGACGTGGGGGCAGTGCGGGCGAGAGGAAGTTTGTCTTTCTCCCAGCTCGGGAGGGTCGCCAGCTTCCCCGGGGCTGCACCTCCTTGGGACGCTTGTCGGGTTGGAGCGCCGCAGCTGCCTCTGCGGCTGCCGCCTGGGTGACGGAGGGTGGGGCGGGGGTGGGTCGCTCGTAGCTCGAGAGCCACGATCTGATTTCAGGGACCGTGCCTATGTGCTGAGTCAAACCCCGCCGCTGGGCTGGGTCTGCAGCCGGGCCGCTGAGCACAATCCGCTGTGGTTAATGATTAATCGCTGACCACCCCGCCTCCCGCAGCTCGGGAGAGGGTGCTCTGGGAATGTGGACCGGGGCTCTCAAGTGCCGGCAGCTGGAAAGGAAGAGGAGTGCTGCGAGGCG…	CGCACTGGTCACGGAG	GGAACTGG	PCR amplification	-	>GPR39_1 CGGTGGACGTGGGGGCAGTGCGGGCGAGAGGAAGTTTGTCTTTCTCCCAGCTCGGGAGGGTCGCCAGCTTCCCCGGGGCTGCACCTCCTTGGGACGCTTGTCGGGTTGGAGCGCCGCAGCTGCCTCTGCGGCTGCCGCCTGGGTGACGGAGGGTGGGGCGGGGGTGGGTCGCTCGTAGCTCGAGAGCCACGATCTGATTTCAGGGACCGTGCCTATGTGCTGAGTCAAACCCCGCCGCTGGGCTGGGTCTGCAGCCGGGCCGCTGAGCACAATCCGCTGTGGTTAATGATTAATCGCTGACCACCCCGCCTCCCGCAGCTCGGGAGAGGGTGCTCTGGGAATGTGGACCGGGGCTCTCAAGTGCCGGCAGCTGGAAAGGAAGAGGAGTGC…
GPR39_2	chr2	133196141	133196642	CAAGCtttttttatttttttttatttttttacatttttttgagtgttgtagaaaaaaaaatatgcgacagtactatgtggtcccataaaacctaaaatatttactatctggccctttaaagaaaaaaatttaccaacTGATGCCTTAAGTCTCAAAGTATACAATCCTTGTTTCAAGTTGAAGGTCTTCCTTAGTTCTGCATCATCCTTTAGTCATTCTCCAGGCCCTTCTGTCATACCCTGAGGGTACACAGGGCCCAAGCCCTGGAGAGAAGGGGAAAGTAGGCCTCCATTAGTCATTTCCTGGCTTCCATGGCTGTCGGAATTCCCCTGCTCTGCCATGGCAGCATATTAATATGTCGCAGCGAGCATGTGTATGTTTAATTCTGATGACATGTGG…	CGCACTGGTCACGGAG	AACAACAC	TWIST synthesis	T replaced by A to break polyT in position 13 and 23	>GPR39_2 CAAGCtttttttatttttttttatttttttacatttttttgagtgttgtagaaaaaaaaatatgcgacagtactatgtggtcccataaaacctaaaatatttactatctggccctttaaagaaaaaaatttaccaacTGATGCCTTAAGTCTCAAAGTATACAATCCTTGTTTCAAGTTGAAGGTCTTCCTTAGTTCTGCATCATCCTTTAGTCATTCTCCAGGCCCTTCTGTCATACCCTGAGGGTACACAGGGCCCAAGCCCTGGAGAGAAGGGGAAAGTAGGCCTCCATTAGTCATTTCCTGGCTTCCATGGCTGTCGGAATTCCCCTGCTCTGCCATGGCAGCATATTAATATGTCGCAGCGAGCATGTGTATGTTTAATTCTGAT…
EDN1_1	chr6	12290387	12290888	CTGCCCCCGAATTGTCAGACGGCGGGCGTCTGCCTCTGAAGTTAGCAGTGATTTCCTTTCGGGCCTGGCCTTATCTCCGGCTGCACGTTGCCTGTTGGTGACTAATAACACAATAACATTGTCTGGGGCTGGAATAAAGTCGGAGCTGTTTACCCCCACTCTAATAGGGGTTCAATATAAAAAGCCGGCAGAGAGCTGTCCAAGTCAGACGCGCCTCTGCATCTGCGCCAGGCGAACGGGTCCTGCGCCTCCTGCAGTCCCAGCTCTCCACCGCCGCGTGCGCCTGCAGACGCTCCGCTCGCTGCCTTCTCTCCTGGCAGGCGCTGCCTTTTCTCCCCGTTAAAAGGGCACTTGGGCTGAAGGATCGCTTTGAGATCTGAGGAACCCGCAGCGCTTTGA…	CGCACTGGTCACGGAG	AACAAGGT	TWIST synthesis	-	>EDN1_1 CTGCCCCCGAATTGTCAGACGGCGGGCGTCTGCCTCTGAAGTTAGCAGTGATTTCCTTTCGGGCCTGGCCTTATCTCCGGCTGCACGTTGCCTGTTGGTGACTAATAACACAATAACATTGTCTGGGGCTGGAATAAAGTCGGAGCTGTTTACCCCCACTCTAATAGGGGTTCAATATAAAAAGCCGGCAGAGAGCTGTCCAAGTCAGACGCGCCTCTGCATCTGCGCCAGGCGAACGGGTCCTGCGCCTCCTGCAGTCCCAGCTCTCCACCGCCGCGTGCGCCTGCAGACGCTCCGCTCGCTGCCTTCTCTCCTGGCAGGCGCTGCCTTTTCTCCCCGTTAAAAGGGCACTTGGGCTGAAGGATCGCTTTGAGATCTGAGGAACCCGCAG…
EDN1_3	chr6	12573377	12573878	AGACATTAAATGGCTTTCTTTCCTTGAGTTCTTAGCTGGAGACAGAACAAAGCAACCTGTTCACTGCCCTCTACAGAAATTTGAATCTAATCAAGGGCTAAAAATTAATCATGTTTTTACAGGAAGAACGACATCAGGAAGCTTTTCTAGCTGGGGGGAAAAATGAGGATGGAAATAAAGCAATGCACTTCACAAATTTGAGAGTTCTGAAAATGACTCATCAAGCAATCATGTCAGGAATGCCTGGCTGTTAGCAGATGGCTGGTTGGGGTGTCAGACCAGCTTCTTGAGATCCAGGTTGAGGGATAGTGTCTCTCCTTCAGAACAGACCTTGGTGTAAACTTGCTGGGATCCACTCCAATCTAGGGATGGAGACTGTGGTCTTCTAAGGGGAGTTGG…	CGCACTGGTCACGGAG	TGCCTATA	TWIST synthesis	-	>EDN1_3 AGACATTAAATGGCTTTCTTTCCTTGAGTTCTTAGCTGGAGACAGAACAAAGCAACCTGTTCACTGCCCTCTACAGAAATTTGAATCTAATCAAGGGCTAAAAATTAATCATGTTTTTACAGGAAGAACGACATCAGGAAGCTTTTCTAGCTGGGGGGAAAAATGAGGATGGAAATAAAGCAATGCACTTCACAAATTTGAGAGTTCTGAAAATGACTCATCAAGCAATCATGTCAGGAATGCCTGGCTGTTAGCAGATGGCTGGTTGGGGTGTCAGACCAGCTTCTTGAGATCCAGGTTGAGGGATAGTGTCTCTCCTTCAGAACAGACCTTGGTGTAAACTTGCTGGGATCCACTCCAATCTAGGGATGGAGACTGTGGTCTTCTAAGG…
CDH1_1	chr16	68794682	68795183	GGTGGGGTGGGACTGTGTGGGCTGGGTCAGCTGGTGGAGCTTCCCCAGAGTGGGGAGGCCAGGGGGAGTCTGGGATGTGGGGTGGTATGTGAACAGGAATACGGGGAGACTCTCAGCCTCTGTTGTTGGCTGAGAGGGGGATGCCCCAAGCCTAGAGAGGTGGGGGCGGGACCTCCTGTGCAGAGACTGGGAGACAGGAATATGACAGATGGTATATTTGGATGGTGACTCAGATAGGTCAAGTGAAACTGAACTTCCGGTCCTCGAGTCACACAGGAGGGTAGGGGCTGTGAGAAAACTCCCTCGTTGGTTCTTCCTACAGGGCCTTTGAGGCAGACAGGGCTCAACAGAGCCTGGCAGGACTGCAGAAGGACAATAGTGTGGCTGGTTGGGTGAGGC…	CGCACTGGTCACGGAG	CGTAGCTT	TWIST synthesis	-	>CDH1_1 GGTGGGGTGGGACTGTGTGGGCTGGGTCAGCTGGTGGAGCTTCCCCAGAGTGGGGAGGCCAGGGGGAGTCTGGGATGTGGGGTGGTATGTGAACAGGAATACGGGGAGACTCTCAGCCTCTGTTGTTGGCTGAGAGGGGGATGCCCCAAGCCTAGAGAGGTGGGGGCGGGACCTCCTGTGCAGAGACTGGGAGACAGGAATATGACAGATGGTATATTTGGATGGTGACTCAGATAGGTCAAGTGAAACTGAACTTCCGGTCCTCGAGTCACACAGGAGGGTAGGGGCTGTGAGAAAACTCCCTCGTTGGTTCTTCCTACAGGGCCTTTGAGGCAGACAGGGCTCAACAGAGCCTGGCAGGACTGCAGAAGGACAATAGTGTGGCTGGTTG…
CDH1_2	chr16	68820444	68820945	ttttttttttttGGTATTCAGGAGGATGCAGCATGGGTTGTAGGCTTCATTTCTCAGGAGCCTGAGCCAAGGCACACATATAGTCTGAGCAGTTACCTTTCCAGGCAGCCAGAGTAGATTCAGCAAATGCTCTTGGAAGCAGCTGCCTTTCCCATCAATGCTTATTTGTTCTTGATAATGAAAAATGATGCTAGCATCCATTAAAAGAGAAAAGGCATCCTCTTGTGAGCTCTATTGGACAAGTGAGCACTTGTTGTACAGTCATCTGCAAGCACATGTGACCTGGAGACTGTGGGAAATGCCTCACTTCGCAGTGTTGGCTCCCAGCTGTTCTCTTGGGCTGTTTGAGTTTTGTTCCAAAGGTCAGAGGCAGAGGGTCCGAGCCTTTCCAGCACAGCC…	CGCACTGGTCACGGAG	GCATTCAT	PCR amplification	-	>CDH1_2 ttttttttttttGGTATTCAGGAGGATGCAGCATGGGTTGTAGGCTTCATTTCTCAGGAGCCTGAGCCAAGGCACACATATAGTCTGAGCAGTTACCTTTCCAGGCAGCCAGAGTAGATTCAGCAAATGCTCTTGGAAGCAGCTGCCTTTCCCATCAATGCTTATTTGTTCTTGATAATGAAAAATGATGCTAGCATCCATTAAAAGAGAAAAGGCATCCTCTTGTGAGCTCTATTGGACAAGTGAGCACTTGTTGTACAGTCATCTGCAAGCACATGTGACCTGGAGACTGTGGGAAATGCCTCACTTCGCAGTGTTGGCTCCCAGCTGTTCTCTTGGGCTGTTTGAGTTTTGTTCCAAAGGTCAGAGGCAGAGGGTCCGAGCCTTTCCA…
SOX10_1A	chr22	38363886	38364387	TATTCCAGTGGCCCTGTGACTGTCAGCTCCTTAAGAAGCACCAGGGGCCCTTAGCCCCTTTGGATCCCCCACATCCTTCCCTCCATCTCCCTGTTCCCCAGAGCAAAGGCTGCTGCAGGGGAGACACCTCAGCTGCCTTCCAAGCAGACAGACAAGTCTTTGTGCCCAGGGAGCTGGTTGCCACGGAAACCCCCAATTTCCTTTCCAGTGGGGACTGGCTGCAGGGGCTTCTCCCTTCTCAGGAGTATCACAGAGCAGGTCTCATCAAGCCACCCATTGTTTCCTAAGGACCTGCTTCGAGCCTCTTATCGTGGGCTCGGATCCCCTTTCAGGAGCAGTGCCCCAGCAGGAAGCGTGGGGGTGTGCTGATCTCCCACCCTCCCCAGGCAGAGCCCTGCT…	CGCACTGGTCACGGAG	ACAACTTC	TWIST synthesis	-	>SOX10_1A TATTCCAGTGGCCCTGTGACTGTCAGCTCCTTAAGAAGCACCAGGGGCCCTTAGCCCCTTTGGATCCCCCACATCCTTCCCTCCATCTCCCTGTTCCCCAGAGCAAAGGCTGCTGCAGGGGAGACACCTCAGCTGCCTTCCAAGCAGACAGACAAGTCTTTGTGCCCAGGGAGCTGGTTGCCACGGAAACCCCCAATTTCCTTTCCAGTGGGGACTGGCTGCAGGGGCTTCTCCCTTCTCAGGAGTATCACAGAGCAGGTCTCATCAAGCCACCCATTGTTTCCTAAGGACCTGCTTCGAGCCTCTTATCGTGGGCTCGGATCCCCTTTCAGGAGCAGTGCCCCAGCAGGAAGCGTGGGGGTGTGCTGATCTCCCACCCTCCCCAGGCA…
SOX10_1B	chr22	38364715	38365216	AATATGCCAGCCTTAACCTCCATTCCACTGCCAGCTCCCCTTCAAAGAGGAGGAGCTGGGCTTCCCTAACCTCTGCAGGAGGCAGGGCCTCCAGGCCTAGGTGCAGCCTGGCCCTGGGATGGGATGTGGGGAGTGAATGGTGAGGATCTGCATTGGTGGGAGGGGTGTCCGCTGCCCTGGAGAAGGGTTAATTCAGGGAGCAGTGGACTTCACACTCCCATCCACCCTCCTCCAAGCCTGTGGAATCCTTTAATCAAGTTGGGTGCTGAAATTTCAGCTCTGAAATGCCGCCTTTGTGCTGGCATCCAGGCAGCCGCCCCAGAGTGCGGGGGTCACTTTCTCGGCCCCATTTCTCTAAATGGTCTCTTTGTTCCCTGCTGGGCTGCTCAGTATCAGATG…	CGCACTGGTCACGGAG	ACCACAGT	TWIST synthesis	-	>SOX10_1B AATATGCCAGCCTTAACCTCCATTCCACTGCCAGCTCCCCTTCAAAGAGGAGGAGCTGGGCTTCCCTAACCTCTGCAGGAGGCAGGGCCTCCAGGCCTAGGTGCAGCCTGGCCCTGGGATGGGATGTGGGGAGTGAATGGTGAGGATCTGCATTGGTGGGAGGGGTGTCCGCTGCCCTGGAGAAGGGTTAATTCAGGGAGCAGTGGACTTCACACTCCCATCCACCCTCCTCCAAGCCTGTGGAATCCTTTAATCAAGTTGGGTGCTGAAATTTCAGCTCTGAAATGCCGCCTTTGTGCTGGCATCCAGGCAGCCGCCCCAGAGTGCGGGGGTCACTTTCTCGGCCCCATTTCTCTAAATGGTCTCTTTGTTCCCTGCTGGGCTGCTCA…
SOX10_3A	chr22	38412486	38412987	CTTTAGCCATGATGCCCTCTGACCTTTCATAAATCAGAGGGGCTTAGGGGCGAGGGGGCTGCTTGGCAGGACTTGGTGGGGTGGGGGCTTAGAAGCAGCTGCGCGCGACGTTGACATTGTTCCCACCATTCTAAGTGCAACAAATCCCTCTATTGTGTTCCTGGTTTATCTGGTTCCTCTTGTTTATGAGCAGGGCTCCTTTGGCAGCGGTTCCAGCCCTGGGCGGGTGGAAAGAGTGCTGGCACGCACCGCGGGGGGAGGGGGCGGGAGGGGGCCGCCGTCAATGCCCGCATTGTCCCCGCGCTTTTTGTTTCTACTGTAATGACATGTTGGAATAGagagagagagagaaggaaaaaaaaaaagatacaagctggggagggaagaggagggcagaaa…	CGCACTGGTCACGGAG	TTGTTCAC	PCR amplification	-	>SOX10_3A CTTTAGCCATGATGCCCTCTGACCTTTCATAAATCAGAGGGGCTTAGGGGCGAGGGGGCTGCTTGGCAGGACTTGGTGGGGTGGGGGCTTAGAAGCAGCTGCGCGCGACGTTGACATTGTTCCCACCATTCTAAGTGCAACAAATCCCTCTATTGTGTTCCTGGTTTATCTGGTTCCTCTTGTTTATGAGCAGGGCTCCTTTGGCAGCGGTTCCAGCCCTGGGCGGGTGGAAAGAGTGCTGGCACGCACCGCGGGGGGAGGGGGCGGGAGGGGGCCGCCGTCAATGCCCGCATTGTCCCCGCGCTTTTTGTTTCTACTGTAATGACATGTTGGAATAGagagagagagagaaggaaaaaaaaaaagatacaagctggggagggaagagg…
SOX10_3B	chr22	38413468	38413969	TGCCAAGGGCTCCCAAGTTGTTCGCCATCTCTGGGCCTGTGGGTGTCTCCCTCTTCAGGTAATGGGCTGTAGGGTCCTTCCAGATCTGGCAGTCTGGGCTGTATCTAGGGCTATGTCCAGGTTGTAGGGAAGAGCTCAGAGCACCTGAATGGGTCATGCAGTCCCGTcagcatctcagggctggaggggccctctgaggctgtggcctctccctgcaacttcctgtaggtctctctgtagcaccagccaagaagtcacccgcccccgctggcacagctccagtgacatggagctcactcctcacatggcttgctctgtccttgcccagcccaggcgtttgggaagttctttctgaactctgtctccctgcagcttctaccctttggttccagttctact…	CGCACTGGTCACGGAG	CCAAGCGT	TWIST synthesis	-	>SOX10_3B TGCCAAGGGCTCCCAAGTTGTTCGCCATCTCTGGGCCTGTGGGTGTCTCCCTCTTCAGGTAATGGGCTGTAGGGTCCTTCCAGATCTGGCAGTCTGGGCTGTATCTAGGGCTATGTCCAGGTTGTAGGGAAGAGCTCAGAGCACCTGAATGGGTCATGCAGTCCCGTcagcatctcagggctggaggggccctctgaggctgtggcctctccctgcaacttcctgtaggtctctctgtagcaccagccaagaagtcacccgcccccgctggcacagctccagtgacatggagctcactcctcacatggcttgctctgtccttgcccagcccaggcgtttgggaagttctttctgaactctgtctccctgcagcttctaccctttggttc…
SOX10_5A	chr22	38433627	38434128	ctccctctgttgcccaggctggagtgcagtggcaccatctcagctcactgcaacctccacctcccgggttcacgcgattctccagcctcagcctcctgagtagctgggactacaggcacgtgccaccattcctggctaatttttgtatttttagtagagatgaggtttcaccacgttggccaggatagtcttgatctcctgacctcgtgatccacccacctcggcctcccaaCTCTTCCTATCCTTTGTTCATGGAGTGCCTCCTATGTGTGGCCCTGTGTGAGGTGCTTTTTGAATAAGTAGCCTCAGCAGAGAGACAGCAGCTCACTTCATGCAGGTTGGCCGGAGGTAGCAAGGGTCATCAAGTCAGCGTGTGGGAAGTACCCTAAGCACAGTAGG…	CGCACTGGTCACGGAG	CAGAACCT	TWIST synthesis	-	>SOX10_5A ctccctctgttgcccaggctggagtgcagtggcaccatctcagctcactgcaacctccacctcccgggttcacgcgattctccagcctcagcctcctgagtagctgggactacaggcacgtgccaccattcctggctaatttttgtatttttagtagagatgaggtttcaccacgttggccaggatagtcttgatctcctgacctcgtgatccacccacctcggcctcccaaCTCTTCCTATCCTTTGTTCATGGAGTGCCTCCTATGTGTGGCCCTGTGTGAGGTGCTTTTTGAATAAGTAGCCTCAGCAGAGAGACAGCAGCTCACTTCATGCAGGTTGGCCGGAGGTAGCAAGGGTCATCAAGTCAGCGTGTGGGAAGTACCCTAA…
SOX10_5B	chr22	38434348	38434849	GAGCTTGGAGCAAGCAGCTTGGGGGAAAGGACCAGGCCGGGCCCAGGCAGGTGGAAGCCATGGCTCTGGCCGGGTCACAGGGCGGCTGGGGTTTGACCTGGCGGCCATGATGGGCTCTGGACCCAGGAGCCACCCGGGCACAGGATGGGACGGGTTGAGAGATTGGTCGTCCAGGCGTTGAGTGTGCCCTCGCTCCTCCCCACCTTCCGCCGTGGCCTTGAGCCCCTTGCGCCCGCGCCCATGGGGTTAAATCTCTCCCTGTCTCTCTCTGCTCCAAGTTGTTTTCCAAGTGAGGCAGAGAATGGTTCTCTTGTTACCAACATGGCTTCTGGGCATTGGGTAATGCGCTCCCTCTTCTCCCGCAGCGCCACAAAGGGACCTTTTGTTCCCCTCCCTGCC…	CGCACTGGTCACGGAG	GGTAGTAT	PCR amplification	-	>SOX10_5B GAGCTTGGAGCAAGCAGCTTGGGGGAAAGGACCAGGCCGGGCCCAGGCAGGTGGAAGCCATGGCTCTGGCCGGGTCACAGGGCGGCTGGGGTTTGACCTGGCGGCCATGATGGGCTCTGGACCCAGGAGCCACCCGGGCACAGGATGGGACGGGTTGAGAGATTGGTCGTCCAGGCGTTGAGTGTGCCCTCGCTCCTCCCCACCTTCCGCCGTGGCCTTGAGCCCCTTGCGCCCGCGCCCATGGGGTTAAATCTCTCCCTGTCTCTCTCTGCTCCAAGTTGTTTTCCAAGTGAGGCAGAGAATGGTTCTCTTGTTACCAACATGGCTTCTGGGCATTGGGTAATGCGCTCCCTCTTCTCCCGCAGCGCCACAAAGGGACCTTTTGTTCC…
IRF4_1	chr6	396104	396605	TGCTGCCATTGGTGTGGATTTTAAGTTGGGGAGGGTCGGGCGTGTCCGCCTGTTGGAATATGCTTCTCAGGTCTTCTGGGAAACAGATGTTTTGTGGAAGTGGAAGATTTTGGAAGTAGTGCCTTATCATGTGAAACCACAGGGCAGCTGATCTCTTCAGGCTTTCTTGATGTGAATGACAGCTTTGTTTCATCCACTTTGGTGGGTAAAAGAAGGCAAATTCCCCTGTGGTACTTTTGGTGCCAGGTTTAGCCATATGACGAAGCTTTACATAAAACAGTACAAGTATCTCCATTGTCCTTTATGATCCTCCATGAGTGTTTTCACTTAGTCTGATGAAGGGTTCACTCCAGTCTTTTCGGATGATAAAATGCTTCGGCTGTCAGTCTAATAAGGGAT…	CGCACTGGTCACGGAG	ATCCATGA	TWIST synthesis	-	>IRF4_1 TGCTGCCATTGGTGTGGATTTTAAGTTGGGGAGGGTCGGGCGTGTCCGCCTGTTGGAATATGCTTCTCAGGTCTTCTGGGAAACAGATGTTTTGTGGAAGTGGAAGATTTTGGAAGTAGTGCCTTATCATGTGAAACCACAGGGCAGCTGATCTCTTCAGGCTTTCTTGATGTGAATGACAGCTTTGTTTCATCCACTTTGGTGGGTAAAAGAAGGCAAATTCCCCTGTGGTACTTTTGGTGCCAGGTTTAGCCATATGACGAAGCTTTACATAAAACAGTACAAGTATCTCCATTGTCCTTTATGATCCTCCATGAGTGTTTTCACTTAGTCTGATGAAGGGTTCACTCCAGTCTTTTCGGATGATAAAATGCTTCGGCTGTCAGTCTAA…
KIT_1A	chr4	55708751	55709252	GCCCCAGGAGAGGGTGTCAGGTTGAATCCGTGGATTCAGATACCGAGTCTGCTGAAGTCAGATTGTCTGACTACAATCCACCTGGCATCCATCAAAGACAAATAAACAAGTTGTGCTTATCACTGAGTTGCCTGGTGTAGCGAAACTATAAATTAGAAATATAACGGCCTCCTCCACAGTGTCACGTGGCTCAGGCAAGGCCCTGGTAGTCCTTGCTCTTAACTGCGTATATGTGTCTTTGAACGTCATCCATCATGGGATTAGCTTGGGTGCAAACTTTGTTTAATTTTGTCCTTTTACATTTAGAATATATGCATTGTTTATATTTGGCCTGAAAGCAAACAGGCCAAAAGATAAACAAGGGTTGCCTTTGTCTGGTAACTCTAGGCACTTTTTTTC…	CGCACTGGTCACGGAG	ATATCACG	TWIST synthesis	-	>KIT_1A GCCCCAGGAGAGGGTGTCAGGTTGAATCCGTGGATTCAGATACCGAGTCTGCTGAAGTCAGATTGTCTGACTACAATCCACCTGGCATCCATCAAAGACAAATAAACAAGTTGTGCTTATCACTGAGTTGCCTGGTGTAGCGAAACTATAAATTAGAAATATAACGGCCTCCTCCACAGTGTCACGTGGCTCAGGCAAGGCCCTGGTAGTCCTTGCTCTTAACTGCGTATATGTGTCTTTGAACGTCATCCATCATGGGATTAGCTTGGGTGCAAACTTTGTTTAATTTTGTCCTTTTACATTTAGAATATATGCATTGTTTATATTTGGCCTGAAAGCAAACAGGCCAAAAGATAAACAAGGGTTGCCTTTGTCTGGTAACTCTAGGCAC…
KIT_1B	chr4	55709231	55709732	tttatttttaaaattttgaaaataaaaaatCCTAACTTAGGTGTACATGAGGGGAGCTGGAAGACAAGGGGAACTTAGTTGAAGGAGTAGGCAAATTCTGACTGTCAGATCGGAGCACCCCTGGGAGAAAGTCAGAGCCAAGTTGCCACTCCAGCAAACTGCCATCAGCCGTCTTTGCACCTCAGCTCTGTGTCCTGTCGGAGGCCTGCCTATTGCAGCTGCCAGGCTCAGCCTTCCTGCTGCGACAGTGCTGATCTTCTTGCAGGATTTCAAACCAAGGAGTGATGTTAGTGAAGTGCTTTCTCCCGCCTGCCCCCACCACACCCGTGCCAACTTTGCCTAAGGGAATCACAATCACAGGACTTCTAGAATGAAGGCTGTGGGGCTTGTCAGTTATTT…	CGCACTGGTCACGGAG	GGATTGCT	TWIST synthesis	-	>KIT_1B tttatttttaaaattttgaaaataaaaaatCCTAACTTAGGTGTACATGAGGGGAGCTGGAAGACAAGGGGAACTTAGTTGAAGGAGTAGGCAAATTCTGACTGTCAGATCGGAGCACCCCTGGGAGAAAGTCAGAGCCAAGTTGCCACTCCAGCAAACTGCCATCAGCCGTCTTTGCACCTCAGCTCTGTGTCCTGTCGGAGGCCTGCCTATTGCAGCTGCCAGGCTCAGCCTTCCTGCTGCGACAGTGCTGATCTTCTTGCAGGATTTCAAACCAAGGAGTGATGTTAGTGAAGTGCTTTCTCCCGCCTGCCCCCACCACACCCGTGCCAACTTTGCCTAAGGGAATCACAATCACAGGACTTCTAGAATGAAGGCTGTGGGGCTTGTC…
MLANA_1	chr9	5895681	5896182	aagaggctgattgggtaggccaggggtggagtcctatgatctgcaccttaacgtgcatctcaggtgattctgctgcaggtggtatttggaagacactctgagGCGCCCTGCCAAGCTGGGCAGTGGGTTCTTCCAATGTGTCAGGCATACCCTGGTGCTTTTCGCTCTCAGTTACTTGGGCATGTTGTGAGTACCACGTGACCATGCATAAAGTGCTGTAACAGAGCTCTGACTGTGTCAAGATATTCAAGTGGACGCCACAGGGTAAAATGAGAGCACAGGCATGTTGGGAGTTGAATCAGCTGCCTTCAGTCACGAGAACACACTGAACACTCCTTGTGACAGCTTCAGTTCAGGAAagagtgactctgcaggaaaagcactggcctgggagacctg…	CGCACTGGTCACGGAG	TGAGTCTT	TWIST synthesis	-	>MLANA_1 aagaggctgattgggtaggccaggggtggagtcctatgatctgcaccttaacgtgcatctcaggtgattctgctgcaggtggtatttggaagacactctgagGCGCCCTGCCAAGCTGGGCAGTGGGTTCTTCCAATGTGTCAGGCATACCCTGGTGCTTTTCGCTCTCAGTTACTTGGGCATGTTGTGAGTACCACGTGACCATGCATAAAGTGCTGTAACAGAGCTCTGACTGTGTCAAGATATTCAAGTGGACGCCACAGGGTAAAATGAGAGCACAGGCATGTTGGGAGTTGAATCAGCTGCCTTCAGTCACGAGAACACACTGAACACTCCTTGTGACAGCTTCAGTTCAGGAAagagtgactctgcaggaaaagcactggcctg…
SGCD_2A	chr5	155902790	155903291	TTCTATTAGAATACTAGAGGATCAGGACAGGGTCCCAAAAGAGGAGCTATGAAGCACTTGGAGGGGAAGGAGACCAAACCTAGGGAAGGCAGAAAGAAAAGGAGAAAAATAAAGATGTGGAGGACAGGCAGCACATTCCTTGCAGCAGGGTGCATTGGAGCTTGAAGGTTAAGCTTCCCAGGGCTGCAGAGTGAGAAATCAGGGAGGGAGGCAATTGTCTGCTTTGTTTTGACTTGCCGTGGCTGAGGGTAACAGTCAGCTGTGACCTCTTCCTCATGACTAATGCTGAGCAGGCTTGGCTAGCCTAGGTTCCCATGTAACTTATCATTAAGCCAAGCCAAGAACTGGACAACATCTAAGTAGTCCCCTACATGGCTGTTTCTGGGGGTATAGGAGAAT…	CGCACTGGTCACGGAG	GAGCTATT	TWIST synthesis	-	>SGCD_2A TTCTATTAGAATACTAGAGGATCAGGACAGGGTCCCAAAAGAGGAGCTATGAAGCACTTGGAGGGGAAGGAGACCAAACCTAGGGAAGGCAGAAAGAAAAGGAGAAAAATAAAGATGTGGAGGACAGGCAGCACATTCCTTGCAGCAGGGTGCATTGGAGCTTGAAGGTTAAGCTTCCCAGGGCTGCAGAGTGAGAAATCAGGGAGGGAGGCAATTGTCTGCTTTGTTTTGACTTGCCGTGGCTGAGGGTAACAGTCAGCTGTGACCTCTTCCTCATGACTAATGCTGAGCAGGCTTGGCTAGCCTAGGTTCCCATGTAACTTATCATTAAGCCAAGCCAAGAACTGGACAACATCTAAGTAGTCCCCTACATGGCTGTTTCTGGGGGTA…
SGCD_2B	chr5	155904130	155904631	TTTCAGAGTCAGTGCTTTCTATGTTCTGTTGTTATGTTTAAGGAATCCTTTAGTATTGTCGAGCCCCATTGAGTAGAATGGTACCAACAAAATATGGTATTTGTTTAGATATGTATGTTTTTATATAATACTTTGGGAGATccggtacattgagcaagtgagactcacaagatgcaaccagacagtgaggttattcttccaagtacaatataacccatagaacccactccttatactcagcatttttctcatctttggataaacataggacaggccccatgacttttctggccactcttagataatgaggagtcatctgaccaatttgagtcacaaacaatctcatttcaattattCTAGACAGAAGATATAAAAGGAAAGGGAAGTATTCCTTGGCTA…	CGCACTGGTCACGGAG	AACACTGA	TWIST synthesis	-	>SGCD_2B TTTCAGAGTCAGTGCTTTCTATGTTCTGTTGTTATGTTTAAGGAATCCTTTAGTATTGTCGAGCCCCATTGAGTAGAATGGTACCAACAAAATATGGTATTTGTTTAGATATGTATGTTTTTATATAATACTTTGGGAGATccggtacattgagcaagtgagactcacaagatgcaaccagacagtgaggttattcttccaagtacaatataacccatagaacccactccttatactcagcatttttctcatctttggataaacataggacaggccccatgacttttctggccactcttagataatgaggagtcatctgaccaatttgagtcacaaacaatctcatttcaattattCTAGACAGAAGATATAAAAGGAAAGGGAAGTATT…
SGCD_3	chr5	156016773	156017274	atttgctgtacgtgctgactttgaacctaactcaattgcaggatgtgGATGTATCTTTACTGAATATGTTTGTGTGTAATTTCTTTTAATACAGCAGATCTGTGCCTAACGGCTGTGGAAAGCACCCACTGTGTTTTAAACTACAAATTCCTGAAATCTAAACAAGGACTGGTTATTCACAATAATGATTATAATGATAAACATGGACCTCGTGATTTGGTAACGTGTTGAGCAGCACAATCAATGCCCACTCTGTAAGCAGTGAACAGGGAGGCATTATGCACCCCCACAGTGGAAGGGAAAAGGAATGTATGTATGAATGGCATTGTTATACTTACAGACAGAAAATGCCATTTGTTTGGCTTCAGGGCTAAAAGTAAAGTATACGGATGGACATTT…	CGCACTGGTCACGGAG	TTCTATCC	TWIST synthesis	-	>SGCD_3 atttgctgtacgtgctgactttgaacctaactcaattgcaggatgtgGATGTATCTTTACTGAATATGTTTGTGTGTAATTTCTTTTAATACAGCAGATCTGTGCCTAACGGCTGTGGAAAGCACCCACTGTGTTTTAAACTACAAATTCCTGAAATCTAAACAAGGACTGGTTATTCACAATAATGATTATAATGATAAACATGGACCTCGTGATTTGGTAACGTGTTGAGCAGCACAATCAATGCCCACTCTGTAAGCAGTGAACAGGGAGGCATTATGCACCCCCACAGTGGAAGGGAAAAGGAATGTATGTATGAATGGCATTGTTATACTTACAGACAGAAAATGCCATTTGTTTGGCTTCAGGGCTAAAAGTAAAGTATACGGAT…
MITF_1	chr3	69985179	69985680	ATGTTCTATTTAGGATAGTGCCCGGTCTTCCTGATGTGAGGTCAATAGGCAGGTTACACATCTATGTAGCTAAGAATAAGGTGCATATTAAGACCAGGATGCAAGAAGAGGCTGTTGAACTTGAACATTCAGCACAGAGTCTCTTCTCTTCTATACTAAAAGATAGTCATCCTGCAGTCGGAAGTGGCAGTTATTCGGCCATTGGAAAAGTCTCATGTAATAGTAGCTTTTAGATGATGTCTCCTCCAAAGGGGCATTCTGCTATTAACCTATTGCTGAAAGAGAAATACCATTGTCTATTAATACTACTGGAACTAAAGATGAATAGTGAATTGGCCTTGATCTGACAGTGAGTTTGACTTTGATAGCTCGTCACTTAAAAAGGTTCTTTTATATTTA…	CGCACTGGTCACGGAG	CCTACTCC	TWIST synthesis	-	>MITF_1 ATGTTCTATTTAGGATAGTGCCCGGTCTTCCTGATGTGAGGTCAATAGGCAGGTTACACATCTATGTAGCTAAGAATAAGGTGCATATTAAGACCAGGATGCAAGAAGAGGCTGTTGAACTTGAACATTCAGCACAGAGTCTCTTCTCTTCTATACTAAAAGATAGTCATCCTGCAGTCGGAAGTGGCAGTTATTCGGCCATTGGAAAAGTCTCATGTAATAGTAGCTTTTAGATGATGTCTCCTCCAAAGGGGCATTCTGCTATTAACCTATTGCTGAAAGAGAAATACCATTGTCTATTAATACTACTGGAACTAAAGATGAATAGTGAATTGGCCTTGATCTGACAGTGAGTTTGACTTTGATAGCTCGTCACTTAAAAAGGTTCTTT…
TYR_1	chr11	88901449	88901950	cttctccaccttgttctgggccccatgaggctgacttgtaagaattgcatcagtaggcttcttgctcctctggcttgagcttggcttcatccccagaggtgcatgactagaagatcagagggcagaagaaagtgacttctgtggtcaggatatttagttctcaaatctctctttgccatgtagacagtggttgcctgcatccttctgtaaggccacagatcctgccagcaggctcagtcgatacagtgatcttctctgtgttccagttcaattgttcattgcccttgcccttcattcccagtgtactgcgtgattacttgtttgattccttaaaccctactcccaaaattgtaaatagtctctttgttaagcccttctcaaaaaaacagcttcagtgcg…	CGCACTGGTCACGGAG	TCAACAGG	TWIST synthesis	-	>TYR_1 cttctccaccttgttctgggccccatgaggctgacttgtaagaattgcatcagtaggcttcttgctcctctggcttgagcttggcttcatccccagaggtgcatgactagaagatcagagggcagaagaaagtgacttctgtggtcaggatatttagttctcaaatctctctttgccatgtagacagtggttgcctgcatccttctgtaaggccacagatcctgccagcaggctcagtcgatacagtgatcttctctgtgttccagttcaattgttcattgcccttgcccttcattcccagtgtactgcgtgattacttgtttgattccttaaaccctactcccaaaattgtaaatagtctctttgttaagcccttctcaaaaaaacagctt…
TYR_2	chr11	88908910	88909411	AGCAGACACAAAAGCCCTTAAAGAGCATGATGAAGACTTTCTAAGTTATTTCACTGGAAGCCTGATAGTGGGGCAAGTGTAAGGCAAAATTCTTAATTAAATTGAACATGATAAGTTGAATTCTGTCTTCGAGAACATAGAAAAGAATTATGAAATGCCACATGTGGTTACAAGTAATGCAGACCCAAGGCTCCCCAGGGACAAGAAGTCTTGTGTTAATCTCTTTGTGGCTCTGAAAGAAAGAGAGAGAGAAAAGATTAAGCCTCCTTGTGGAGATCATGTGATGACTTCCTGATTCCAGCCAGAGGCAGCATTTCCATGGAAACTTCTCTTCCTCTTCACCCACACACTGCTCCATGTACCTGCAAAGCCTGTTCTGTCTCAAAAAAGTTGTTTGGA…	CGCACTGGTCACGGAG	CAAGAAGA	TWIST synthesis	T replaced by A to break polyT in position 416	>TYR_2 AGCAGACACAAAAGCCCTTAAAGAGCATGATGAAGACTTTCTAAGTTATTTCACTGGAAGCCTGATAGTGGGGCAAGTGTAAGGCAAAATTCTTAATTAAATTGAACATGATAAGTTGAATTCTGTCTTCGAGAACATAGAAAAGAATTATGAAATGCCACATGTGGTTACAAGTAATGCAGACCCAAGGCTCCCCAGGGACAAGAAGTCTTGTGTTAATCTCTTTGTGGCTCTGAAAGAAAGAGAGAGAGAAAAGATTAAGCCTCCTTGTGGAGATCATGTGATGACTTCCTGATTCCAGCCAGAGGCAGCATTTCCATGGAAACTTCTCTTCCTCTTCACCCACACACTGCTCCATGTACCTGCAAAGCCTGTTCTGTCTCAAAAAAGTT…

## Sheet: Enhancer tiling A library
Chromosome	Start	End	Name
chr2	28497319	28497509	chr2:28497319-28497509@@FOSL2_1==wt
chr2	28497339	28497529	chr2:28497339-28497529@@FOSL2_1==wt
chr2	28497359	28497549	chr2:28497359-28497549@@FOSL2_1==wt
chr2	28497379	28497569	chr2:28497379-28497569@@FOSL2_1==wt
chr2	28497399	28497589	chr2:28497399-28497589@@FOSL2_1==wt
chr2	28497419	28497609	chr2:28497419-28497609@@FOSL2_1==wt
chr2	28497439	28497629	chr2:28497439-28497629@@FOSL2_1==wt
chr2	28497459	28497649	chr2:28497459-28497649@@FOSL2_1==wt
chr2	28497479	28497669	chr2:28497479-28497669@@FOSL2_1==wt
chr2	28497499	28497689	chr2:28497499-28497689@@FOSL2_1==wt
chr2	28497519	28497709	chr2:28497519-28497709@@FOSL2_1==wt
chr2	28497539	28497729	chr2:28497539-28497729@@FOSL2_1==wt
chr2	28497559	28497749	chr2:28497559-28497749@@FOSL2_1==wt
chr2	28497579	28497769	chr2:28497579-28497769@@FOSL2_1==wt
chr2	28497599	28497789	chr2:28497599-28497789@@FOSL2_1==wt
chr2	28497619	28497809	chr2:28497619-28497809@@FOSL2_1==wt
chr2	28497639	28497829	chr2:28497639-28497829@@FOSL2_1==wt
chr2	28497659	28497849	chr2:28497659-28497849@@FOSL2_1==wt
chr2	28497679	28497869	chr2:28497679-28497869@@FOSL2_1==wt
chr2	28497699	28497889	chr2:28497699-28497889@@FOSL2_1==wt
chr2	28497719	28497909	chr2:28497719-28497909@@FOSL2_1==wt
chr2	28497739	28497929	chr2:28497739-28497929@@FOSL2_1==wt
chr2	28497759	28497949	chr2:28497759-28497949@@FOSL2_1==wt
chr2	28497779	28497969	chr2:28497779-28497969@@FOSL2_1==wt
chr2	28497799	28497989	chr2:28497799-28497989@@FOSL2_1==wt
chr2	28497819	28498009	chr2:28497819-28498009@@FOSL2_1==wt
chr2	28497839	28498029	chr2:28497839-28498029@@FOSL2_1==wt
chr2	28497859	28498049	chr2:28497859-28498049@@FOSL2_1==wt
chr2	28497879	28498069	chr2:28497879-28498069@@FOSL2_1==wt
chr2	28497899	28498089	chr2:28497899-28498089@@FOSL2_1==wt
chr2	28497919	28498109	chr2:28497919-28498109@@FOSL2_1==wt
chr2	28497939	28498129	chr2:28497939-28498129@@FOSL2_1==wt
chr2	28497959	28498149	chr2:28497959-28498149@@FOSL2_1==wt
chr2	28497979	28498169	chr2:28497979-28498169@@FOSL2_1==wt
chr2	28497999	28498189	chr2:28497999-28498189@@FOSL2_1==wt
chr2	28498019	28498209	chr2:28498019-28498209@@FOSL2_1==wt
chr2	28498039	28498229	chr2:28498039-28498229@@FOSL2_1==wt
chr2	28498059	28498249	chr2:28498059-28498249@@FOSL2_1==wt
chr2	28498079	28498269	chr2:28498079-28498269@@FOSL2_1==wt
chr2	28498099	28498289	chr2:28498099-28498289@@FOSL2_1==wt
chr2	28498119	28498309	chr2:28498119-28498309@@FOSL2_1==wt
chr2	28498139	28498329	chr2:28498139-28498329@@FOSL2_1==wt
chr2	28498159	28498349	chr2:28498159-28498349@@FOSL2_1==wt
chr2	28498179	28498369	chr2:28498179-28498369@@FOSL2_1==wt
chr2	28498199	28498389	chr2:28498199-28498389@@FOSL2_1==wt
chr2	28498219	28498409	chr2:28498219-28498409@@FOSL2_1==wt
chr2	28498239	28498429	chr2:28498239-28498429@@FOSL2_1==wt
chr2	28498259	28498449	chr2:28498259-28498449@@FOSL2_1==wt
chr2	28498279	28498469	chr2:28498279-28498469@@FOSL2_1==wt
chr2	28498299	28498489	chr2:28498299-28498489@@FOSL2_1==wt
chr2	28498319	28498509	chr2:28498319-28498509@@FOSL2_1==wt
chr2	28498339	28498529	chr2:28498339-28498529@@FOSL2_1==wt
chr2	28498359	28498549	chr2:28498359-28498549@@FOSL2_1==wt
chr2	28498379	28498569	chr2:28498379-28498569@@FOSL2_1==wt
chr2	28498399	28498589	chr2:28498399-28498589@@FOSL2_1==wt
chr2	28498419	28498609	chr2:28498419-28498609@@FOSL2_1==wt
chr2	28498439	28498629	chr2:28498439-28498629@@FOSL2_1==wt
chr2	28498459	28498649	chr2:28498459-28498649@@FOSL2_1==wt
chr2	28498479	28498669	chr2:28498479-28498669@@FOSL2_1==wt
chr2	28498499	28498689	chr2:28498499-28498689@@FOSL2_1==wt
chr2	28498519	28498709	chr2:28498519-28498709@@FOSL2_1==wt
chr2	28498539	28498729	chr2:28498539-28498729@@FOSL2_1==wt
chr2	28498559	28498749	chr2:28498559-28498749@@FOSL2_1==wt
chr2	28498579	28498769	chr2:28498579-28498769@@FOSL2_1==wt
chr2	28498599	28498789	chr2:28498599-28498789@@FOSL2_1==wt
chr2	28498619	28498809	chr2:28498619-28498809@@FOSL2_1==wt
chr2	28498639	28498829	chr2:28498639-28498829@@FOSL2_1==wt
chr2	28498659	28498849	chr2:28498659-28498849@@FOSL2_1==wt
chr2	28498679	28498869	chr2:28498679-28498869@@FOSL2_1==wt
chr2	28498699	28498889	chr2:28498699-28498889@@FOSL2_1==wt
chr2	28498719	28498909	chr2:28498719-28498909@@FOSL2_1==wt
chr2	28498739	28498929	chr2:28498739-28498929@@FOSL2_1==wt
chr2	28498759	28498949	chr2:28498759-28498949@@FOSL2_1==wt
chr2	28498779	28498969	chr2:28498779-28498969@@FOSL2_1==wt
chr2	28498799	28498989	chr2:28498799-28498989@@FOSL2_1==wt
chr2	28498819	28499009	chr2:28498819-28499009@@FOSL2_1==wt
chr2	28498839	28499029	chr2:28498839-28499029@@FOSL2_1==wt
chr2	28498859	28499049	chr2:28498859-28499049@@FOSL2_1==wt
chr2	28498879	28499069	chr2:28498879-28499069@@FOSL2_1==wt
chr2	28498899	28499089	chr2:28498899-28499089@@FOSL2_1==wt
chr2	28498919	28499109	chr2:28498919-28499109@@FOSL2_1==wt
chr2	28498939	28499129	chr2:28498939-28499129@@FOSL2_1==wt
chr2	28498959	28499149	chr2:28498959-28499149@@FOSL2_1==wt
chr2	28498979	28499169	chr2:28498979-28499169@@FOSL2_1==wt
chr2	28498999	28499189	chr2:28498999-28499189@@FOSL2_1==wt
chr2	28499019	28499209	chr2:28499019-28499209@@FOSL2_1==wt
chr2	28499039	28499229	chr2:28499039-28499229@@FOSL2_1==wt
chr2	28499059	28499249	chr2:28499059-28499249@@FOSL2_1==wt
chr2	28499079	28499269	chr2:28499079-28499269@@FOSL2_1==wt
chr2	28499099	28499289	chr2:28499099-28499289@@FOSL2_1==wt
chr2	28499119	28499309	chr2:28499119-28499309@@FOSL2_1==wt
chr2	28499139	28499329	chr2:28499139-28499329@@FOSL2_1==wt
chr2	28499159	28499349	chr2:28499159-28499349@@FOSL2_1==wt
chr2	28499179	28499369	chr2:28499179-28499369@@FOSL2_1==wt
chr2	28499199	28499389	chr2:28499199-28499389@@FOSL2_1==wt
chr2	28499219	28499409	chr2:28499219-28499409@@FOSL2_1==wt
chr2	28499239	28499429	chr2:28499239-28499429@@FOSL2_1==wt
chr2	28499259	28499449	chr2:28499259-28499449@@FOSL2_1==wt
chr2	28499279	28499469	chr2:28499279-28499469@@FOSL2_1==wt
chr2	28499299	28499489	chr2:28499299-28499489@@FOSL2_1==wt
chr2	28499319	28499509	chr2:28499319-28499509@@FOSL2_1==wt
chr2	28499339	28499529	chr2:28499339-28499529@@FOSL2_1==wt
chr2	28499359	28499549	chr2:28499359-28499549@@FOSL2_1==wt
chr2	28499379	28499569	chr2:28499379-28499569@@FOSL2_1==wt
chr2	28499399	28499589	chr2:28499399-28499589@@FOSL2_1==wt
chr2	28499419	28499609	chr2:28499419-28499609@@FOSL2_1==wt
chr2	28499439	28499629	chr2:28499439-28499629@@FOSL2_1==wt
chr2	28499459	28499649	chr2:28499459-28499649@@FOSL2_1==wt
chr2	28499479	28499669	chr2:28499479-28499669@@FOSL2_1==wt
chr2	28499499	28499689	chr2:28499499-28499689@@FOSL2_1==wt
chr2	28499519	28499709	chr2:28499519-28499709@@FOSL2_1==wt
chr2	28499539	28499729	chr2:28499539-28499729@@FOSL2_1==wt
chr2	28499559	28499749	chr2:28499559-28499749@@FOSL2_1==wt
chr2	28499579	28499769	chr2:28499579-28499769@@FOSL2_1==wt
chr2	28499599	28499789	chr2:28499599-28499789@@FOSL2_1==wt
chr2	28499619	28499809	chr2:28499619-28499809@@FOSL2_1==wt
chr2	28499639	28499829	chr2:28499639-28499829@@FOSL2_1==wt
chr2	28499659	28499849	chr2:28499659-28499849@@FOSL2_1==wt
chr2	28499679	28499869	chr2:28499679-28499869@@FOSL2_1==wt
chr2	28499699	28499889	chr2:28499699-28499889@@FOSL2_1==wt
chr2	28499719	28499909	chr2:28499719-28499909@@FOSL2_1==wt
chr2	28499739	28499929	chr2:28499739-28499929@@FOSL2_1==wt
chr2	28499759	28499949	chr2:28499759-28499949@@FOSL2_1==wt
chr2	28499779	28499969	chr2:28499779-28499969@@FOSL2_1==wt
chr2	28499799	28499989	chr2:28499799-28499989@@FOSL2_1==wt
chr2	28499819	28500009	chr2:28499819-28500009@@FOSL2_1==wt
chr2	28499839	28500029	chr2:28499839-28500029@@FOSL2_1==wt
chr2	28499859	28500049	chr2:28499859-28500049@@FOSL2_1==wt
chr2	28499879	28500069	chr2:28499879-28500069@@FOSL2_1==wt
chr2	28499899	28500089	chr2:28499899-28500089@@FOSL2_1==wt
chr2	28499919	28500109	chr2:28499919-28500109@@FOSL2_1==wt
chr2	28499939	28500129	chr2:28499939-28500129@@FOSL2_1==wt
chr2	28499959	28500149	chr2:28499959-28500149@@FOSL2_1==wt
chr2	28499979	28500169	chr2:28499979-28500169@@FOSL2_1==wt
chr2	133173225	133173415	chr2:133173225-133173415@@GPR39_1==wt
chr2	133173245	133173435	chr2:133173245-133173435@@GPR39_1==wt
chr2	133173265	133173455	chr2:133173265-133173455@@GPR39_1==wt
chr2	133173285	133173475	chr2:133173285-133173475@@GPR39_1==wt
chr2	133173305	133173495	chr2:133173305-133173495@@GPR39_1==wt
chr2	133173325	133173515	chr2:133173325-133173515@@GPR39_1==wt
chr2	133173345	133173535	chr2:133173345-133173535@@GPR39_1==wt
chr2	133173365	133173555	chr2:133173365-133173555@@GPR39_1==wt
chr2	133173385	133173575	chr2:133173385-133173575@@GPR39_1==wt
chr2	133173405	133173595	chr2:133173405-133173595@@GPR39_1==wt
chr2	133173425	133173615	chr2:133173425-133173615@@GPR39_1==wt
chr2	133173445	133173635	chr2:133173445-133173635@@GPR39_1==wt
chr2	133173465	133173655	chr2:133173465-133173655@@GPR39_1==wt
chr2	133173485	133173675	chr2:133173485-133173675@@GPR39_1==wt
chr2	133173505	133173695	chr2:133173505-133173695@@GPR39_1==wt
chr2	133173525	133173715	chr2:133173525-133173715@@GPR39_1==wt
chr2	133173545	133173735	chr2:133173545-133173735@@GPR39_1==wt
chr2	133173565	133173755	chr2:133173565-133173755@@GPR39_1==wt
chr2	133173585	133173775	chr2:133173585-133173775@@GPR39_1==wt
chr2	133173605	133173795	chr2:133173605-133173795@@GPR39_1==wt
chr2	133173625	133173815	chr2:133173625-133173815@@GPR39_1==wt
chr2	133173645	133173835	chr2:133173645-133173835@@GPR39_1==wt
chr2	133173665	133173855	chr2:133173665-133173855@@GPR39_1==wt
chr2	133173685	133173875	chr2:133173685-133173875@@GPR39_1==wt
chr2	133173705	133173895	chr2:133173705-133173895@@GPR39_1==wt
chr2	133173725	133173915	chr2:133173725-133173915@@GPR39_1==wt
chr2	133173745	133173935	chr2:133173745-133173935@@GPR39_1==wt
chr2	133173765	133173955	chr2:133173765-133173955@@GPR39_1==wt
chr2	133173785	133173975	chr2:133173785-133173975@@GPR39_1==wt
chr2	133173805	133173995	chr2:133173805-133173995@@GPR39_1==wt
chr2	133173825	133174015	chr2:133173825-133174015@@GPR39_1==wt
chr2	133173845	133174035	chr2:133173845-133174035@@GPR39_1==wt
chr2	133173865	133174055	chr2:133173865-133174055@@GPR39_1==wt
chr2	133173885	133174075	chr2:133173885-133174075@@GPR39_1==wt
chr2	133173905	133174095	chr2:133173905-133174095@@GPR39_1==wt
chr2	133173925	133174115	chr2:133173925-133174115@@GPR39_1==wt
chr2	133173945	133174135	chr2:133173945-133174135@@GPR39_1==wt
chr2	133173965	133174155	chr2:133173965-133174155@@GPR39_1==wt
chr2	133173985	133174175	chr2:133173985-133174175@@GPR39_1==wt
chr2	133174005	133174195	chr2:133174005-133174195@@GPR39_1==wt
chr2	133174025	133174215	chr2:133174025-133174215@@GPR39_1==wt
chr2	133174045	133174235	chr2:133174045-133174235@@GPR39_1==wt
chr2	133174065	133174255	chr2:133174065-133174255@@GPR39_1==wt
chr2	133174085	133174275	chr2:133174085-133174275@@GPR39_1==wt
chr2	133174105	133174295	chr2:133174105-133174295@@GPR39_1==wt
chr2	133174125	133174315	chr2:133174125-133174315@@GPR39_1==wt
chr2	133174145	133174335	chr2:133174145-133174335@@GPR39_1==wt
chr2	133174165	133174355	chr2:133174165-133174355@@GPR39_1==wt
chr2	133174185	133174375	chr2:133174185-133174375@@GPR39_1==wt
chr2	133174205	133174395	chr2:133174205-133174395@@GPR39_1==wt
chr2	133174225	133174415	chr2:133174225-133174415@@GPR39_1==wt
chr2	133174245	133174435	chr2:133174245-133174435@@GPR39_1==wt
chr2	133174265	133174455	chr2:133174265-133174455@@GPR39_1==wt
chr2	133174285	133174475	chr2:133174285-133174475@@GPR39_1==wt
chr2	133174305	133174495	chr2:133174305-133174495@@GPR39_1==wt
chr2	133174325	133174515	chr2:133174325-133174515@@GPR39_1==wt
chr2	133174345	133174535	chr2:133174345-133174535@@GPR39_1==wt
chr2	133174365	133174555	chr2:133174365-133174555@@GPR39_1==wt
chr2	133174385	133174575	chr2:133174385-133174575@@GPR39_1==wt
chr2	133174405	133174595	chr2:133174405-133174595@@GPR39_1==wt
chr2	133174425	133174615	chr2:133174425-133174615@@GPR39_1==wt
chr2	133174445	133174635	chr2:133174445-133174635@@GPR39_1==wt
chr2	133174465	133174655	chr2:133174465-133174655@@GPR39_1==wt
chr2	133174485	133174675	chr2:133174485-133174675@@GPR39_1==wt
chr2	133174505	133174695	chr2:133174505-133174695@@GPR39_1==wt
chr2	133174525	133174715	chr2:133174525-133174715@@GPR39_1==wt
chr2	133174545	133174735	chr2:133174545-133174735@@GPR39_1==wt
chr2	133174565	133174755	chr2:133174565-133174755@@GPR39_1==wt
chr2	133174585	133174775	chr2:133174585-133174775@@GPR39_1==wt
chr2	133174605	133174795	chr2:133174605-133174795@@GPR39_1==wt
chr2	133174625	133174815	chr2:133174625-133174815@@GPR39_1==wt
chr2	133174645	133174835	chr2:133174645-133174835@@GPR39_1==wt
chr2	133174665	133174855	chr2:133174665-133174855@@GPR39_1==wt
chr2	133174685	133174875	chr2:133174685-133174875@@GPR39_1==wt
chr2	133174705	133174895	chr2:133174705-133174895@@GPR39_1==wt
chr2	133174725	133174915	chr2:133174725-133174915@@GPR39_1==wt
chr2	133174745	133174935	chr2:133174745-133174935@@GPR39_1==wt
chr2	133174765	133174955	chr2:133174765-133174955@@GPR39_1==wt
chr2	133174785	133174975	chr2:133174785-133174975@@GPR39_1==wt
chr2	133174805	133174995	chr2:133174805-133174995@@GPR39_1==wt
chr2	133174825	133175015	chr2:133174825-133175015@@GPR39_1==wt
chr2	133174845	133175035	chr2:133174845-133175035@@GPR39_1==wt
chr2	133174865	133175055	chr2:133174865-133175055@@GPR39_1==wt
chr2	133174885	133175075	chr2:133174885-133175075@@GPR39_1==wt
chr2	133174905	133175095	chr2:133174905-133175095@@GPR39_1==wt
chr2	133174925	133175115	chr2:133174925-133175115@@GPR39_1==wt
chr2	133174945	133175135	chr2:133174945-133175135@@GPR39_1==wt
chr2	133174965	133175155	chr2:133174965-133175155@@GPR39_1==wt
chr2	133174985	133175175	chr2:133174985-133175175@@GPR39_1==wt
chr2	133175005	133175195	chr2:133175005-133175195@@GPR39_1==wt
chr2	133175025	133175215	chr2:133175025-133175215@@GPR39_1==wt
chr2	133175045	133175235	chr2:133175045-133175235@@GPR39_1==wt
chr2	133175065	133175255	chr2:133175065-133175255@@GPR39_1==wt
chr2	133175085	133175275	chr2:133175085-133175275@@GPR39_1==wt
chr2	133175105	133175295	chr2:133175105-133175295@@GPR39_1==wt
chr2	133175125	133175315	chr2:133175125-133175315@@GPR39_1==wt
chr2	133175145	133175335	chr2:133175145-133175335@@GPR39_1==wt
chr2	133175165	133175355	chr2:133175165-133175355@@GPR39_1==wt
chr2	133175185	133175375	chr2:133175185-133175375@@GPR39_1==wt
chr2	133175205	133175395	chr2:133175205-133175395@@GPR39_1==wt
chr2	133175225	133175415	chr2:133175225-133175415@@GPR39_1==wt
chr2	133175245	133175435	chr2:133175245-133175435@@GPR39_1==wt
chr2	133175265	133175455	chr2:133175265-133175455@@GPR39_1==wt
chr2	133175285	133175475	chr2:133175285-133175475@@GPR39_1==wt
chr2	133175305	133175495	chr2:133175305-133175495@@GPR39_1==wt
chr2	133175325	133175515	chr2:133175325-133175515@@GPR39_1==wt
chr2	133175345	133175535	chr2:133175345-133175535@@GPR39_1==wt
chr2	133175365	133175555	chr2:133175365-133175555@@GPR39_1==wt
chr2	133175385	133175575	chr2:133175385-133175575@@GPR39_1==wt
chr2	133175405	133175595	chr2:133175405-133175595@@GPR39_1==wt
chr2	133175425	133175615	chr2:133175425-133175615@@GPR39_1==wt
chr2	133195728	133195918	chr2:133195728-133195918@@GPR39_2==wt
chr2	133195748	133195938	chr2:133195748-133195938@@GPR39_2==wt
chr2	133195768	133195958	chr2:133195768-133195958@@GPR39_2==wt
chr2	133195788	133195978	chr2:133195788-133195978@@GPR39_2==wt
chr2	133195808	133195998	chr2:133195808-133195998@@GPR39_2==wt
chr2	133195828	133196018	chr2:133195828-133196018@@GPR39_2==wt
chr2	133195848	133196038	chr2:133195848-133196038@@GPR39_2==wt
chr2	133195868	133196058	chr2:133195868-133196058@@GPR39_2==wt
chr2	133195888	133196078	chr2:133195888-133196078@@GPR39_2==wt
chr2	133195908	133196098	chr2:133195908-133196098@@GPR39_2==wt
chr2	133195928	133196118	chr2:133195928-133196118@@GPR39_2==wt
chr2	133195948	133196138	chr2:133195948-133196138@@GPR39_2==wt
chr2	133195968	133196158	chr2:133195968-133196158@@GPR39_2==wt
chr2	133195988	133196178	chr2:133195988-133196178@@GPR39_2==wt
chr2	133196008	133196198	chr2:133196008-133196198@@GPR39_2==wt
chr2	133196028	133196218	chr2:133196028-133196218@@GPR39_2==wt
chr2	133196048	133196238	chr2:133196048-133196238@@GPR39_2==wt
chr2	133196068	133196258	chr2:133196068-133196258@@GPR39_2==wt
chr2	133196088	133196278	chr2:133196088-133196278@@GPR39_2==wt
chr2	133196108	133196298	chr2:133196108-133196298@@GPR39_2==wt
chr2	133196128	133196318	chr2:133196128-133196318@@GPR39_2==wt
chr2	133196148	133196338	chr2:133196148-133196338@@GPR39_2==wt
chr2	133196168	133196358	chr2:133196168-133196358@@GPR39_2==wt
chr2	133196188	133196378	chr2:133196188-133196378@@GPR39_2==wt
chr2	133196208	133196398	chr2:133196208-133196398@@GPR39_2==wt
chr2	133196228	133196418	chr2:133196228-133196418@@GPR39_2==wt
chr2	133196248	133196438	chr2:133196248-133196438@@GPR39_2==wt
chr2	133196268	133196458	chr2:133196268-133196458@@GPR39_2==wt
chr2	133196288	133196478	chr2:133196288-133196478@@GPR39_2==wt
chr2	133196308	133196498	chr2:133196308-133196498@@GPR39_2==wt
chr2	133196328	133196518	chr2:133196328-133196518@@GPR39_2==wt
chr2	133196348	133196538	chr2:133196348-133196538@@GPR39_2==wt
chr2	133196368	133196558	chr2:133196368-133196558@@GPR39_2==wt
chr2	133196388	133196578	chr2:133196388-133196578@@GPR39_2==wt
chr2	133196408	133196598	chr2:133196408-133196598@@GPR39_2==wt
chr2	133196428	133196618	chr2:133196428-133196618@@GPR39_2==wt
chr2	133196448	133196638	chr2:133196448-133196638@@GPR39_2==wt
chr2	133196468	133196658	chr2:133196468-133196658@@GPR39_2==wt
chr2	133196488	133196678	chr2:133196488-133196678@@GPR39_2==wt
chr2	133196508	133196698	chr2:133196508-133196698@@GPR39_2==wt
chr2	133196528	133196718	chr2:133196528-133196718@@GPR39_2==wt
chr2	133196548	133196738	chr2:133196548-133196738@@GPR39_2==wt
chr2	133196568	133196758	chr2:133196568-133196758@@GPR39_2==wt
chr2	133196588	133196778	chr2:133196588-133196778@@GPR39_2==wt
chr2	133196608	133196798	chr2:133196608-133196798@@GPR39_2==wt
chr2	133196628	133196818	chr2:133196628-133196818@@GPR39_2==wt
chr2	133196648	133196838	chr2:133196648-133196838@@GPR39_2==wt
chr2	133196668	133196858	chr2:133196668-133196858@@GPR39_2==wt
chr2	133196688	133196878	chr2:133196688-133196878@@GPR39_2==wt
chr2	133196708	133196898	chr2:133196708-133196898@@GPR39_2==wt
chr2	133196728	133196918	chr2:133196728-133196918@@GPR39_2==wt
chr2	133196748	133196938	chr2:133196748-133196938@@GPR39_2==wt
chr2	133196768	133196958	chr2:133196768-133196958@@GPR39_2==wt
chr2	133196788	133196978	chr2:133196788-133196978@@GPR39_2==wt
chr2	133196808	133196998	chr2:133196808-133196998@@GPR39_2==wt
chr2	133196828	133197018	chr2:133196828-133197018@@GPR39_2==wt
chr2	133196848	133197038	chr2:133196848-133197038@@GPR39_2==wt
chr2	133196868	133197058	chr2:133196868-133197058@@GPR39_2==wt
chr2	133196888	133197078	chr2:133196888-133197078@@GPR39_2==wt
chr2	133196908	133197098	chr2:133196908-133197098@@GPR39_2==wt
chr2	133196928	133197118	chr2:133196928-133197118@@GPR39_2==wt
chr2	133196948	133197138	chr2:133196948-133197138@@GPR39_2==wt
chr2	133196968	133197158	chr2:133196968-133197158@@GPR39_2==wt
chr2	133196988	133197178	chr2:133196988-133197178@@GPR39_2==wt
chr2	133197008	133197198	chr2:133197008-133197198@@GPR39_2==wt
chr2	133197028	133197218	chr2:133197028-133197218@@GPR39_2==wt
chr2	133197048	133197238	chr2:133197048-133197238@@GPR39_2==wt
chr2	133197068	133197258	chr2:133197068-133197258@@GPR39_2==wt
chr2	133197088	133197278	chr2:133197088-133197278@@GPR39_2==wt
chr2	133197108	133197298	chr2:133197108-133197298@@GPR39_2==wt
chr2	133197128	133197318	chr2:133197128-133197318@@GPR39_2==wt
chr2	133197148	133197338	chr2:133197148-133197338@@GPR39_2==wt
chr2	133197168	133197358	chr2:133197168-133197358@@GPR39_2==wt
chr2	133197188	133197378	chr2:133197188-133197378@@GPR39_2==wt
chr2	133197208	133197398	chr2:133197208-133197398@@GPR39_2==wt
chr2	133197228	133197418	chr2:133197228-133197418@@GPR39_2==wt
chr2	133197248	133197438	chr2:133197248-133197438@@GPR39_2==wt
chr2	133197268	133197458	chr2:133197268-133197458@@GPR39_2==wt
chr2	133197288	133197478	chr2:133197288-133197478@@GPR39_2==wt
chr2	133197308	133197498	chr2:133197308-133197498@@GPR39_2==wt
chr2	133197328	133197518	chr2:133197328-133197518@@GPR39_2==wt
chr2	133197348	133197538	chr2:133197348-133197538@@GPR39_2==wt
chr2	133197368	133197558	chr2:133197368-133197558@@GPR39_2==wt
chr2	133197388	133197578	chr2:133197388-133197578@@GPR39_2==wt
chr2	133197408	133197598	chr2:133197408-133197598@@GPR39_2==wt
chr2	133197428	133197618	chr2:133197428-133197618@@GPR39_2==wt
chr2	133197448	133197638	chr2:133197448-133197638@@GPR39_2==wt
chr2	133197468	133197658	chr2:133197468-133197658@@GPR39_2==wt
chr2	133197488	133197678	chr2:133197488-133197678@@GPR39_2==wt
chr2	133197508	133197698	chr2:133197508-133197698@@GPR39_2==wt
chr2	133197528	133197718	chr2:133197528-133197718@@GPR39_2==wt
chr2	133197548	133197738	chr2:133197548-133197738@@GPR39_2==wt
chr2	133197568	133197758	chr2:133197568-133197758@@GPR39_2==wt
chr2	133197588	133197778	chr2:133197588-133197778@@GPR39_2==wt
chr2	133197608	133197798	chr2:133197608-133197798@@GPR39_2==wt
chr2	133197628	133197818	chr2:133197628-133197818@@GPR39_2==wt
chr2	133197648	133197838	chr2:133197648-133197838@@GPR39_2==wt
chr2	133197668	133197858	chr2:133197668-133197858@@GPR39_2==wt
chr2	133197688	133197878	chr2:133197688-133197878@@GPR39_2==wt
chr2	133197708	133197898	chr2:133197708-133197898@@GPR39_2==wt
chr2	133197728	133197918	chr2:133197728-133197918@@GPR39_2==wt
chr2	133197748	133197938	chr2:133197748-133197938@@GPR39_2==wt
chr2	133197768	133197958	chr2:133197768-133197958@@GPR39_2==wt
chr2	133197788	133197978	chr2:133197788-133197978@@GPR39_2==wt
chr2	133197808	133197998	chr2:133197808-133197998@@GPR39_2==wt
chr2	133197828	133198018	chr2:133197828-133198018@@GPR39_2==wt
chr2	133197848	133198038	chr2:133197848-133198038@@GPR39_2==wt
chr2	133197868	133198058	chr2:133197868-133198058@@GPR39_2==wt
chr2	133197888	133198078	chr2:133197888-133198078@@GPR39_2==wt
chr2	133197908	133198098	chr2:133197908-133198098@@GPR39_2==wt
chr2	133197928	133198118	chr2:133197928-133198118@@GPR39_2==wt
chr2	133197948	133198138	chr2:133197948-133198138@@GPR39_2==wt
chr2	133197968	133198158	chr2:133197968-133198158@@GPR39_2==wt
chr2	133197988	133198178	chr2:133197988-133198178@@GPR39_2==wt
chr2	133380117	133380307	chr2:133380117-133380307@@GPR39_3==wt
chr2	133380137	133380327	chr2:133380137-133380327@@GPR39_3==wt
chr2	133380157	133380347	chr2:133380157-133380347@@GPR39_3==wt
chr2	133380177	133380367	chr2:133380177-133380367@@GPR39_3==wt
chr2	133380197	133380387	chr2:133380197-133380387@@GPR39_3==wt
chr2	133380217	133380407	chr2:133380217-133380407@@GPR39_3==wt
chr2	133380237	133380427	chr2:133380237-133380427@@GPR39_3==wt
chr2	133380257	133380447	chr2:133380257-133380447@@GPR39_3==wt
chr2	133380277	133380467	chr2:133380277-133380467@@GPR39_3==wt
chr2	133380297	133380487	chr2:133380297-133380487@@GPR39_3==wt
chr2	133380317	133380507	chr2:133380317-133380507@@GPR39_3==wt
chr2	133380337	133380527	chr2:133380337-133380527@@GPR39_3==wt
chr2	133380357	133380547	chr2:133380357-133380547@@GPR39_3==wt
chr2	133380377	133380567	chr2:133380377-133380567@@GPR39_3==wt
chr2	133380397	133380587	chr2:133380397-133380587@@GPR39_3==wt
chr2	133380417	133380607	chr2:133380417-133380607@@GPR39_3==wt
chr2	133380437	133380627	chr2:133380437-133380627@@GPR39_3==wt
chr2	133380457	133380647	chr2:133380457-133380647@@GPR39_3==wt
chr2	133380477	133380667	chr2:133380477-133380667@@GPR39_3==wt
chr2	133380497	133380687	chr2:133380497-133380687@@GPR39_3==wt
chr2	133380517	133380707	chr2:133380517-133380707@@GPR39_3==wt
chr2	133380537	133380727	chr2:133380537-133380727@@GPR39_3==wt
chr2	133380557	133380747	chr2:133380557-133380747@@GPR39_3==wt
chr2	133380577	133380767	chr2:133380577-133380767@@GPR39_3==wt
chr2	133380597	133380787	chr2:133380597-133380787@@GPR39_3==wt
chr2	133380617	133380807	chr2:133380617-133380807@@GPR39_3==wt
chr2	133380637	133380827	chr2:133380637-133380827@@GPR39_3==wt
chr2	133380657	133380847	chr2:133380657-133380847@@GPR39_3==wt
chr2	133380677	133380867	chr2:133380677-133380867@@GPR39_3==wt
chr2	133380697	133380887	chr2:133380697-133380887@@GPR39_3==wt
chr2	133380717	133380907	chr2:133380717-133380907@@GPR39_3==wt
chr2	133380737	133380927	chr2:133380737-133380927@@GPR39_3==wt
chr2	133380757	133380947	chr2:133380757-133380947@@GPR39_3==wt
chr2	133380777	133380967	chr2:133380777-133380967@@GPR39_3==wt
chr2	133380797	133380987	chr2:133380797-133380987@@GPR39_3==wt
chr2	133380817	133381007	chr2:133380817-133381007@@GPR39_3==wt
chr2	133380837	133381027	chr2:133380837-133381027@@GPR39_3==wt
chr2	133380857	133381047	chr2:133380857-133381047@@GPR39_3==wt
chr2	133380877	133381067	chr2:133380877-133381067@@GPR39_3==wt
chr2	133380897	133381087	chr2:133380897-133381087@@GPR39_3==wt
chr2	133380917	133381107	chr2:133380917-133381107@@GPR39_3==wt
chr2	133380937	133381127	chr2:133380937-133381127@@GPR39_3==wt
chr2	133380957	133381147	chr2:133380957-133381147@@GPR39_3==wt
chr2	133380977	133381167	chr2:133380977-133381167@@GPR39_3==wt
chr2	133380997	133381187	chr2:133380997-133381187@@GPR39_3==wt
chr2	133381017	133381207	chr2:133381017-133381207@@GPR39_3==wt
chr2	133381037	133381227	chr2:133381037-133381227@@GPR39_3==wt
chr2	133381057	133381247	chr2:133381057-133381247@@GPR39_3==wt
chr2	133381077	133381267	chr2:133381077-133381267@@GPR39_3==wt
chr2	133381097	133381287	chr2:133381097-133381287@@GPR39_3==wt
chr2	133381117	133381307	chr2:133381117-133381307@@GPR39_3==wt
chr2	133381137	133381327	chr2:133381137-133381327@@GPR39_3==wt
chr2	133381157	133381347	chr2:133381157-133381347@@GPR39_3==wt
chr2	133381177	133381367	chr2:133381177-133381367@@GPR39_3==wt
chr2	133381197	133381387	chr2:133381197-133381387@@GPR39_3==wt
chr2	133381217	133381407	chr2:133381217-133381407@@GPR39_3==wt
chr2	133381237	133381427	chr2:133381237-133381427@@GPR39_3==wt
chr2	133381257	133381447	chr2:133381257-133381447@@GPR39_3==wt
chr2	133381277	133381467	chr2:133381277-133381467@@GPR39_3==wt
chr2	133381297	133381487	chr2:133381297-133381487@@GPR39_3==wt
chr2	133381317	133381507	chr2:133381317-133381507@@GPR39_3==wt
chr2	133381337	133381527	chr2:133381337-133381527@@GPR39_3==wt
chr2	133381357	133381547	chr2:133381357-133381547@@GPR39_3==wt
chr2	133381377	133381567	chr2:133381377-133381567@@GPR39_3==wt
chr2	133381397	133381587	chr2:133381397-133381587@@GPR39_3==wt
chr2	133381417	133381607	chr2:133381417-133381607@@GPR39_3==wt
chr2	133381437	133381627	chr2:133381437-133381627@@GPR39_3==wt
chr2	133381457	133381647	chr2:133381457-133381647@@GPR39_3==wt
chr2	133381477	133381667	chr2:133381477-133381667@@GPR39_3==wt
chr2	133381497	133381687	chr2:133381497-133381687@@GPR39_3==wt
chr2	133381517	133381707	chr2:133381517-133381707@@GPR39_3==wt
chr2	133381537	133381727	chr2:133381537-133381727@@GPR39_3==wt
chr2	133381557	133381747	chr2:133381557-133381747@@GPR39_3==wt
chr2	133381577	133381767	chr2:133381577-133381767@@GPR39_3==wt
chr2	133381597	133381787	chr2:133381597-133381787@@GPR39_3==wt
chr2	133381617	133381807	chr2:133381617-133381807@@GPR39_3==wt
chr2	133381637	133381827	chr2:133381637-133381827@@GPR39_3==wt
chr2	133381657	133381847	chr2:133381657-133381847@@GPR39_3==wt
chr2	133381677	133381867	chr2:133381677-133381867@@GPR39_3==wt
chr2	133381697	133381887	chr2:133381697-133381887@@GPR39_3==wt
chr2	133381717	133381907	chr2:133381717-133381907@@GPR39_3==wt
chr2	133381737	133381927	chr2:133381737-133381927@@GPR39_3==wt
chr2	133381757	133381947	chr2:133381757-133381947@@GPR39_3==wt
chr2	133381777	133381967	chr2:133381777-133381967@@GPR39_3==wt
chr2	133381797	133381987	chr2:133381797-133381987@@GPR39_3==wt
chr2	133381817	133382007	chr2:133381817-133382007@@GPR39_3==wt
chr2	133381837	133382027	chr2:133381837-133382027@@GPR39_3==wt
chr2	133381857	133382047	chr2:133381857-133382047@@GPR39_3==wt
chr2	133381877	133382067	chr2:133381877-133382067@@GPR39_3==wt
chr2	133381897	133382087	chr2:133381897-133382087@@GPR39_3==wt
chr2	133381917	133382107	chr2:133381917-133382107@@GPR39_3==wt
chr2	133381937	133382127	chr2:133381937-133382127@@GPR39_3==wt
chr2	133381957	133382147	chr2:133381957-133382147@@GPR39_3==wt
chr2	133381977	133382167	chr2:133381977-133382167@@GPR39_3==wt
chr2	133381997	133382187	chr2:133381997-133382187@@GPR39_3==wt
chr2	133382017	133382207	chr2:133382017-133382207@@GPR39_3==wt
chr3	69985219	69985409	chr3:69985219-69985409@@MITF_1==wt
chr3	69985239	69985429	chr3:69985239-69985429@@MITF_1==wt
chr3	69985259	69985449	chr3:69985259-69985449@@MITF_1==wt
chr3	69985279	69985469	chr3:69985279-69985469@@MITF_1==wt
chr3	69985299	69985489	chr3:69985299-69985489@@MITF_1==wt
chr3	69985319	69985509	chr3:69985319-69985509@@MITF_1==wt
chr3	69985339	69985529	chr3:69985339-69985529@@MITF_1==wt
chr3	69985359	69985549	chr3:69985359-69985549@@MITF_1==wt
chr3	69985379	69985569	chr3:69985379-69985569@@MITF_1==wt
chr3	69985399	69985589	chr3:69985399-69985589@@MITF_1==wt
chr3	69985419	69985609	chr3:69985419-69985609@@MITF_1==wt
chr3	69985439	69985629	chr3:69985439-69985629@@MITF_1==wt
chr3	69985459	69985649	chr3:69985459-69985649@@MITF_1==wt
chr3	69985479	69985669	chr3:69985479-69985669@@MITF_1==wt
chr3	69985499	69985689	chr3:69985499-69985689@@MITF_1==wt
chr3	69985519	69985709	chr3:69985519-69985709@@MITF_1==wt
chr3	69985539	69985729	chr3:69985539-69985729@@MITF_1==wt
chr3	69985559	69985749	chr3:69985559-69985749@@MITF_1==wt
chr3	69985579	69985769	chr3:69985579-69985769@@MITF_1==wt
chr3	69985599	69985789	chr3:69985599-69985789@@MITF_1==wt
chr3	69985619	69985809	chr3:69985619-69985809@@MITF_1==wt
chr3	69985639	69985829	chr3:69985639-69985829@@MITF_1==wt
chr3	69985659	69985849	chr3:69985659-69985849@@MITF_1==wt
chr3	69985679	69985869	chr3:69985679-69985869@@MITF_1==wt
chr3	69985699	69985889	chr3:69985699-69985889@@MITF_1==wt
chr3	69985719	69985909	chr3:69985719-69985909@@MITF_1==wt
chr3	69985739	69985929	chr3:69985739-69985929@@MITF_1==wt
chr3	69985759	69985949	chr3:69985759-69985949@@MITF_1==wt
chr3	69985779	69985969	chr3:69985779-69985969@@MITF_1==wt
chr3	69985799	69985989	chr3:69985799-69985989@@MITF_1==wt
chr3	69985819	69986009	chr3:69985819-69986009@@MITF_1==wt
chr3	69985839	69986029	chr3:69985839-69986029@@MITF_1==wt
chr3	69985859	69986049	chr3:69985859-69986049@@MITF_1==wt
chr3	69985879	69986069	chr3:69985879-69986069@@MITF_1==wt
chr3	69985899	69986089	chr3:69985899-69986089@@MITF_1==wt
chr3	69985919	69986109	chr3:69985919-69986109@@MITF_1==wt
chr3	69985939	69986129	chr3:69985939-69986129@@MITF_1==wt
chr3	69985959	69986149	chr3:69985959-69986149@@MITF_1==wt
chr3	69985979	69986169	chr3:69985979-69986169@@MITF_1==wt
chr3	69985999	69986189	chr3:69985999-69986189@@MITF_1==wt
chr3	69986019	69986209	chr3:69986019-69986209@@MITF_1==wt
chr3	69986039	69986229	chr3:69986039-69986229@@MITF_1==wt
chr3	69986059	69986249	chr3:69986059-69986249@@MITF_1==wt
chr3	69986079	69986269	chr3:69986079-69986269@@MITF_1==wt
chr3	69986099	69986289	chr3:69986099-69986289@@MITF_1==wt
chr3	69986119	69986309	chr3:69986119-69986309@@MITF_1==wt
chr3	69986139	69986329	chr3:69986139-69986329@@MITF_1==wt
chr3	69986159	69986349	chr3:69986159-69986349@@MITF_1==wt
chr3	69986179	69986369	chr3:69986179-69986369@@MITF_1==wt
chr3	69986199	69986389	chr3:69986199-69986389@@MITF_1==wt
chr3	69986219	69986409	chr3:69986219-69986409@@MITF_1==wt
chr3	69986239	69986429	chr3:69986239-69986429@@MITF_1==wt
chr3	69986259	69986449	chr3:69986259-69986449@@MITF_1==wt
chr3	69986279	69986469	chr3:69986279-69986469@@MITF_1==wt
chr3	69986299	69986489	chr3:69986299-69986489@@MITF_1==wt
chr3	69986319	69986509	chr3:69986319-69986509@@MITF_1==wt
chr3	69986339	69986529	chr3:69986339-69986529@@MITF_1==wt
chr3	69986359	69986549	chr3:69986359-69986549@@MITF_1==wt
chr3	69986379	69986569	chr3:69986379-69986569@@MITF_1==wt
chr3	69986399	69986589	chr3:69986399-69986589@@MITF_1==wt
chr3	69986419	69986609	chr3:69986419-69986609@@MITF_1==wt
chr3	69986439	69986629	chr3:69986439-69986629@@MITF_1==wt
chr3	69986459	69986649	chr3:69986459-69986649@@MITF_1==wt
chr3	69986479	69986669	chr3:69986479-69986669@@MITF_1==wt
chr3	69986499	69986689	chr3:69986499-69986689@@MITF_1==wt
chr3	69986519	69986709	chr3:69986519-69986709@@MITF_1==wt
chr3	69986539	69986729	chr3:69986539-69986729@@MITF_1==wt
chr3	69986559	69986749	chr3:69986559-69986749@@MITF_1==wt
chr3	69986579	69986769	chr3:69986579-69986769@@MITF_1==wt
chr3	69986599	69986789	chr3:69986599-69986789@@MITF_1==wt
chr3	69986619	69986809	chr3:69986619-69986809@@MITF_1==wt
chr3	69986639	69986829	chr3:69986639-69986829@@MITF_1==wt
chr3	69986659	69986849	chr3:69986659-69986849@@MITF_1==wt
chr3	69986679	69986869	chr3:69986679-69986869@@MITF_1==wt
chr3	69986699	69986889	chr3:69986699-69986889@@MITF_1==wt
chr3	69986719	69986909	chr3:69986719-69986909@@MITF_1==wt
chr3	69986739	69986929	chr3:69986739-69986929@@MITF_1==wt
chr3	69986759	69986949	chr3:69986759-69986949@@MITF_1==wt
chr3	69986779	69986969	chr3:69986779-69986969@@MITF_1==wt
chr3	69986799	69986989	chr3:69986799-69986989@@MITF_1==wt
chr3	69986819	69987009	chr3:69986819-69987009@@MITF_1==wt
chr3	69986839	69987029	chr3:69986839-69987029@@MITF_1==wt
chr3	69986859	69987049	chr3:69986859-69987049@@MITF_1==wt
chr3	69986879	69987069	chr3:69986879-69987069@@MITF_1==wt
chr3	69986899	69987089	chr3:69986899-69987089@@MITF_1==wt
chr3	69986919	69987109	chr3:69986919-69987109@@MITF_1==wt
chr3	69986939	69987129	chr3:69986939-69987129@@MITF_1==wt
chr3	69986959	69987149	chr3:69986959-69987149@@MITF_1==wt
chr3	69986979	69987169	chr3:69986979-69987169@@MITF_1==wt
chr3	69986999	69987189	chr3:69986999-69987189@@MITF_1==wt
chr3	69987019	69987209	chr3:69987019-69987209@@MITF_1==wt
chr3	69987039	69987229	chr3:69987039-69987229@@MITF_1==wt
chr3	69987059	69987249	chr3:69987059-69987249@@MITF_1==wt
chr3	69987079	69987269	chr3:69987079-69987269@@MITF_1==wt
chr3	69987099	69987289	chr3:69987099-69987289@@MITF_1==wt
chr3	69987119	69987309	chr3:69987119-69987309@@MITF_1==wt
chr3	69987139	69987329	chr3:69987139-69987329@@MITF_1==wt
chr3	69987159	69987349	chr3:69987159-69987349@@MITF_1==wt
chr3	69987179	69987369	chr3:69987179-69987369@@MITF_1==mut_cisbp_M5907_chr3
chr3	69987199	69987389	chr3:69987199-69987389@@MITF_1==mut_cisbp_M5907_chr3
chr3	69987219	69987409	chr3:69987219-69987409@@MITF_1==mut_cisbp_M5907_chr3
chr3	69987239	69987429	chr3:69987239-69987429@@MITF_1==mut_cisbp_M5907_chr3
chr3	69987259	69987449	chr3:69987259-69987449@@MITF_1==mut_cisbp_M5907_chr3
chr3	69987279	69987469	chr3:69987279-69987469@@MITF_1==mut_cisbp_M5907_chr3
chr3	69987299	69987489	chr3:69987299-69987489@@MITF_1==mut_cisbp_M5907_chr3
chr3	69987319	69987509	chr3:69987319-69987509@@MITF_1==mut_cisbp_M5907_chr3
chr3	69987339	69987529	chr3:69987339-69987529@@MITF_1==mut_cisbp_M5907_chr3
chr3	69987359	69987549	chr3:69987359-69987549@@MITF_1==wt
chr3	69987379	69987569	chr3:69987379-69987569@@MITF_1==wt
chr3	69987399	69987589	chr3:69987399-69987589@@MITF_1==wt
chr3	69987419	69987609	chr3:69987419-69987609@@MITF_1==wt
chr3	69987439	69987629	chr3:69987439-69987629@@MITF_1==wt
chr3	69987459	69987649	chr3:69987459-69987649@@MITF_1==wt
chr3	69987479	69987669	chr3:69987479-69987669@@MITF_1==wt
chr3	69987499	69987689	chr3:69987499-69987689@@MITF_1==wt
chr3	69987519	69987709	chr3:69987519-69987709@@MITF_1==wt
chr3	69987539	69987729	chr3:69987539-69987729@@MITF_1==wt
chr3	69987559	69987749	chr3:69987559-69987749@@MITF_1==wt
chr3	69987579	69987769	chr3:69987579-69987769@@MITF_1==wt
chr3	69987599	69987789	chr3:69987599-69987789@@MITF_1==wt
chr3	124703722	124703912	chr3:124703722-124703912@@HEG1_1==mut_cisbp_M5907_chr3
chr3	124703742	124703932	chr3:124703742-124703932@@HEG1_1==mut_cisbp_M5907_chr3
chr3	124703762	124703952	chr3:124703762-124703952@@HEG1_1==mut_cisbp_M5907_chr3
chr3	124703782	124703972	chr3:124703782-124703972@@HEG1_1==mut_cisbp_M5907_chr3
chr3	124703802	124703992	chr3:124703802-124703992@@HEG1_1==mut_cisbp_M5907_chr3
chr3	124703822	124704012	chr3:124703822-124704012@@HEG1_1==wt
chr3	124703842	124704032	chr3:124703842-124704032@@HEG1_1==wt
chr3	124703862	124704052	chr3:124703862-124704052@@HEG1_1==wt
chr3	124703882	124704072	chr3:124703882-124704072@@HEG1_1==wt
chr3	124703902	124704092	chr3:124703902-124704092@@HEG1_1==wt
chr3	124703922	124704112	chr3:124703922-124704112@@HEG1_1==wt
chr3	124703942	124704132	chr3:124703942-124704132@@HEG1_1==wt
chr3	124703962	124704152	chr3:124703962-124704152@@HEG1_1==wt
chr3	124703982	124704172	chr3:124703982-124704172@@HEG1_1==wt
chr3	124704002	124704192	chr3:124704002-124704192@@HEG1_1==wt
chr3	124704022	124704212	chr3:124704022-124704212@@HEG1_1==wt
chr3	124704042	124704232	chr3:124704042-124704232@@HEG1_1==wt
chr3	124704062	124704252	chr3:124704062-124704252@@HEG1_1==wt
chr3	124704082	124704272	chr3:124704082-124704272@@HEG1_1==wt
chr3	124704102	124704292	chr3:124704102-124704292@@HEG1_1==wt
chr3	124704122	124704312	chr3:124704122-124704312@@HEG1_1==wt
chr3	124704142	124704332	chr3:124704142-124704332@@HEG1_1==wt
chr3	124704162	124704352	chr3:124704162-124704352@@HEG1_1==wt
chr3	124704182	124704372	chr3:124704182-124704372@@HEG1_1==wt
chr3	124704202	124704392	chr3:124704202-124704392@@HEG1_1==wt
chr3	124704222	124704412	chr3:124704222-124704412@@HEG1_1==mut_cisbp_M5907_chr3
chr3	124704242	124704432	chr3:124704242-124704432@@HEG1_1==mut_cisbp_M5907_chr3
chr3	124704262	124704452	chr3:124704262-124704452@@HEG1_1==mut_cisbp_M5907_chr3
chr3	124704282	124704472	chr3:124704282-124704472@@HEG1_1==mut_cisbp_M5907_chr3
chr3	124704302	124704492	chr3:124704302-124704492@@HEG1_1==mut_cisbp_M5907_chr3
chr3	124704322	124704512	chr3:124704322-124704512@@HEG1_1==mut_cisbp_M5907_chr3
chr3	124704342	124704532	chr3:124704342-124704532@@HEG1_1==mut_cisbp_M5907_chr3
chr3	124704362	124704552	chr3:124704362-124704552@@HEG1_1==mut_cisbp_M5907_chr3
chr3	124704382	124704572	chr3:124704382-124704572@@HEG1_1==mut_cisbp_M5907_chr3
chr3	124704402	124704592	chr3:124704402-124704592@@HEG1_1==mut_cisbp_M5907_chr3
chr3	124704422	124704612	chr3:124704422-124704612@@HEG1_1==wt
chr3	124704442	124704632	chr3:124704442-124704632@@HEG1_1==wt
chr3	124704462	124704652	chr3:124704462-124704652@@HEG1_1==wt
chr3	124704482	124704672	chr3:124704482-124704672@@HEG1_1==wt
chr3	124704502	124704692	chr3:124704502-124704692@@HEG1_1==wt
chr3	124704522	124704712	chr3:124704522-124704712@@HEG1_1==wt
chr3	124704542	124704732	chr3:124704542-124704732@@HEG1_1==wt
chr3	124704562	124704752	chr3:124704562-124704752@@HEG1_1==wt
chr3	124704582	124704772	chr3:124704582-124704772@@HEG1_1==wt
chr3	124704602	124704792	chr3:124704602-124704792@@HEG1_1==wt
chr3	124704622	124704812	chr3:124704622-124704812@@HEG1_1==wt
chr3	124704642	124704832	chr3:124704642-124704832@@HEG1_1==wt
chr3	124704662	124704852	chr3:124704662-124704852@@HEG1_1==wt
chr3	124704682	124704872	chr3:124704682-124704872@@HEG1_1==wt
chr3	124704702	124704892	chr3:124704702-124704892@@HEG1_1==wt
chr3	124704722	124704912	chr3:124704722-124704912@@HEG1_1==wt
chr3	124704742	124704932	chr3:124704742-124704932@@HEG1_1==wt
chr3	124704762	124704952	chr3:124704762-124704952@@HEG1_1==wt
chr3	124704782	124704972	chr3:124704782-124704972@@HEG1_1==wt
chr3	124704802	124704992	chr3:124704802-124704992@@HEG1_1==wt
chr3	124704822	124705012	chr3:124704822-124705012@@HEG1_1==wt
chr3	124704842	124705032	chr3:124704842-124705032@@HEG1_1==wt
chr3	124704862	124705052	chr3:124704862-124705052@@HEG1_1==wt
chr3	124704882	124705072	chr3:124704882-124705072@@HEG1_1==wt
chr3	124704902	124705092	chr3:124704902-124705092@@HEG1_1==wt
chr3	124704922	124705112	chr3:124704922-124705112@@HEG1_1==wt
chr3	124704942	124705132	chr3:124704942-124705132@@HEG1_1==wt
chr3	124704962	124705152	chr3:124704962-124705152@@HEG1_1==wt
chr3	124704982	124705172	chr3:124704982-124705172@@HEG1_1==wt
chr3	124705002	124705192	chr3:124705002-124705192@@HEG1_1==wt
chr3	124705022	124705212	chr3:124705022-124705212@@HEG1_1==wt
chr3	124705042	124705232	chr3:124705042-124705232@@HEG1_1==wt
chr3	124705062	124705252	chr3:124705062-124705252@@HEG1_1==wt
chr3	124705082	124705272	chr3:124705082-124705272@@HEG1_1==wt
chr3	124705102	124705292	chr3:124705102-124705292@@HEG1_1==wt
chr3	124705122	124705312	chr3:124705122-124705312@@HEG1_1==wt
chr3	124705142	124705332	chr3:124705142-124705332@@HEG1_1==wt
chr3	124705162	124705352	chr3:124705162-124705352@@HEG1_1==wt
chr3	124705182	124705372	chr3:124705182-124705372@@HEG1_1==wt
chr3	124705202	124705392	chr3:124705202-124705392@@HEG1_1==wt
chr3	124705222	124705412	chr3:124705222-124705412@@HEG1_1==wt
chr3	124705242	124705432	chr3:124705242-124705432@@HEG1_1==wt
chr3	124705262	124705452	chr3:124705262-124705452@@HEG1_1==wt
chr3	124705282	124705472	chr3:124705282-124705472@@HEG1_1==wt
chr3	124705302	124705492	chr3:124705302-124705492@@HEG1_1==wt
chr3	124705322	124705512	chr3:124705322-124705512@@HEG1_1==wt
chr3	124705342	124705532	chr3:124705342-124705532@@HEG1_1==wt
chr3	124705362	124705552	chr3:124705362-124705552@@HEG1_1==wt
chr3	124705382	124705572	chr3:124705382-124705572@@HEG1_1==wt
chr3	124705402	124705592	chr3:124705402-124705592@@HEG1_1==wt
chr3	124705422	124705612	chr3:124705422-124705612@@HEG1_1==wt
chr3	124705442	124705632	chr3:124705442-124705632@@HEG1_1==wt
chr3	124705462	124705652	chr3:124705462-124705652@@HEG1_1==wt
chr3	124705482	124705672	chr3:124705482-124705672@@HEG1_1==wt
chr3	124705502	124705692	chr3:124705502-124705692@@HEG1_1==wt
chr3	124705522	124705712	chr3:124705522-124705712@@HEG1_1==wt
chr3	124705542	124705732	chr3:124705542-124705732@@HEG1_1==wt
chr3	124705562	124705752	chr3:124705562-124705752@@HEG1_1==wt
chr3	124705582	124705772	chr3:124705582-124705772@@HEG1_1==wt
chr3	124705602	124705792	chr3:124705602-124705792@@HEG1_1==wt
chr3	124705622	124705812	chr3:124705622-124705812@@HEG1_1==wt
chr3	124705642	124705832	chr3:124705642-124705832@@HEG1_1==wt
chr3	124705662	124705852	chr3:124705662-124705852@@HEG1_1==wt
chr4	55708266	55708456	chr4:55708266-55708456@@KIT_1==wt
chr4	55708286	55708476	chr4:55708286-55708476@@KIT_1==wt
chr4	55708306	55708496	chr4:55708306-55708496@@KIT_1==wt
chr4	55708326	55708516	chr4:55708326-55708516@@KIT_1==wt
chr4	55708346	55708536	chr4:55708346-55708536@@KIT_1==wt
chr4	55708366	55708556	chr4:55708366-55708556@@KIT_1==wt
chr4	55708386	55708576	chr4:55708386-55708576@@KIT_1==wt
chr4	55708406	55708596	chr4:55708406-55708596@@KIT_1==wt
chr4	55708426	55708616	chr4:55708426-55708616@@KIT_1==wt
chr4	55708446	55708636	chr4:55708446-55708636@@KIT_1==wt
chr4	55708466	55708656	chr4:55708466-55708656@@KIT_1==wt
chr4	55708486	55708676	chr4:55708486-55708676@@KIT_1==wt
chr4	55708506	55708696	chr4:55708506-55708696@@KIT_1==wt
chr4	55708526	55708716	chr4:55708526-55708716@@KIT_1==wt
chr4	55708546	55708736	chr4:55708546-55708736@@KIT_1==wt
chr4	55708566	55708756	chr4:55708566-55708756@@KIT_1==wt
chr4	55708586	55708776	chr4:55708586-55708776@@KIT_1==wt
chr4	55708606	55708796	chr4:55708606-55708796@@KIT_1==wt
chr4	55708626	55708816	chr4:55708626-55708816@@KIT_1==wt
chr4	55708646	55708836	chr4:55708646-55708836@@KIT_1==wt
chr4	55708666	55708856	chr4:55708666-55708856@@KIT_1==wt
chr4	55708686	55708876	chr4:55708686-55708876@@KIT_1==wt
chr4	55708706	55708896	chr4:55708706-55708896@@KIT_1==wt
chr4	55708726	55708916	chr4:55708726-55708916@@KIT_1==wt
chr4	55708746	55708936	chr4:55708746-55708936@@KIT_1==wt
chr4	55708766	55708956	chr4:55708766-55708956@@KIT_1==wt
chr4	55708786	55708976	chr4:55708786-55708976@@KIT_1==wt
chr4	55708806	55708996	chr4:55708806-55708996@@KIT_1==wt
chr4	55708826	55709016	chr4:55708826-55709016@@KIT_1==wt
chr4	55708846	55709036	chr4:55708846-55709036@@KIT_1==wt
chr4	55708866	55709056	chr4:55708866-55709056@@KIT_1==wt
chr4	55708886	55709076	chr4:55708886-55709076@@KIT_1==wt
chr4	55708906	55709096	chr4:55708906-55709096@@KIT_1==wt
chr4	55708926	55709116	chr4:55708926-55709116@@KIT_1==wt
chr4	55708946	55709136	chr4:55708946-55709136@@KIT_1==wt
chr4	55708966	55709156	chr4:55708966-55709156@@KIT_1==wt
chr4	55708986	55709176	chr4:55708986-55709176@@KIT_1==wt
chr4	55709006	55709196	chr4:55709006-55709196@@KIT_1==wt
chr4	55709026	55709216	chr4:55709026-55709216@@KIT_1==wt
chr4	55709046	55709236	chr4:55709046-55709236@@KIT_1==wt
chr4	55709066	55709256	chr4:55709066-55709256@@KIT_1==wt
chr4	55709086	55709276	chr4:55709086-55709276@@KIT_1==wt
chr4	55709106	55709296	chr4:55709106-55709296@@KIT_1==wt
chr4	55709126	55709316	chr4:55709126-55709316@@KIT_1==wt
chr4	55709146	55709336	chr4:55709146-55709336@@KIT_1==wt
chr4	55709166	55709356	chr4:55709166-55709356@@KIT_1==wt
chr4	55709186	55709376	chr4:55709186-55709376@@KIT_1==wt
chr4	55709206	55709396	chr4:55709206-55709396@@KIT_1==wt
chr4	55709226	55709416	chr4:55709226-55709416@@KIT_1==wt
chr4	55709246	55709436	chr4:55709246-55709436@@KIT_1==wt
chr4	55709266	55709456	chr4:55709266-55709456@@KIT_1==wt
chr4	55709286	55709476	chr4:55709286-55709476@@KIT_1==wt
chr4	55709306	55709496	chr4:55709306-55709496@@KIT_1==wt
chr4	55709326	55709516	chr4:55709326-55709516@@KIT_1==wt
chr4	55709346	55709536	chr4:55709346-55709536@@KIT_1==wt
chr4	55709366	55709556	chr4:55709366-55709556@@KIT_1==wt
chr4	55709386	55709576	chr4:55709386-55709576@@KIT_1==wt
chr4	55709406	55709596	chr4:55709406-55709596@@KIT_1==wt
chr4	55709426	55709616	chr4:55709426-55709616@@KIT_1==wt
chr4	55709446	55709636	chr4:55709446-55709636@@KIT_1==wt
chr4	55709466	55709656	chr4:55709466-55709656@@KIT_1==wt
chr4	55709486	55709676	chr4:55709486-55709676@@KIT_1==wt
chr4	55709506	55709696	chr4:55709506-55709696@@KIT_1==wt
chr4	55709526	55709716	chr4:55709526-55709716@@KIT_1==wt
chr4	55709546	55709736	chr4:55709546-55709736@@KIT_1==wt
chr4	55709566	55709756	chr4:55709566-55709756@@KIT_1==wt
chr4	55709586	55709776	chr4:55709586-55709776@@KIT_1==wt
chr4	55709606	55709796	chr4:55709606-55709796@@KIT_1==wt
chr4	55709626	55709816	chr4:55709626-55709816@@KIT_1==wt
chr4	55709646	55709836	chr4:55709646-55709836@@KIT_1==wt
chr4	55709666	55709856	chr4:55709666-55709856@@KIT_1==wt
chr4	55709686	55709876	chr4:55709686-55709876@@KIT_1==wt
chr4	55709706	55709896	chr4:55709706-55709896@@KIT_1==wt
chr4	55709726	55709916	chr4:55709726-55709916@@KIT_1==wt
chr4	55709746	55709936	chr4:55709746-55709936@@KIT_1==wt
chr4	55709766	55709956	chr4:55709766-55709956@@KIT_1==wt
chr4	55709786	55709976	chr4:55709786-55709976@@KIT_1==wt
chr4	55709806	55709996	chr4:55709806-55709996@@KIT_1==wt
chr4	55709826	55710016	chr4:55709826-55710016@@KIT_1==wt
chr4	123684497	123684687	chr4:123684497-123684687@@FGF2_1==wt
chr4	123684517	123684707	chr4:123684517-123684707@@FGF2_1==wt
chr4	123684537	123684727	chr4:123684537-123684727@@FGF2_1==wt
chr4	123684557	123684747	chr4:123684557-123684747@@FGF2_1==wt
chr4	123684577	123684767	chr4:123684577-123684767@@FGF2_1==wt
chr4	123684597	123684787	chr4:123684597-123684787@@FGF2_1==wt
chr4	123684617	123684807	chr4:123684617-123684807@@FGF2_1==wt
chr4	123684637	123684827	chr4:123684637-123684827@@FGF2_1==wt
chr4	123684657	123684847	chr4:123684657-123684847@@FGF2_1==wt
chr4	123684677	123684867	chr4:123684677-123684867@@FGF2_1==wt
chr4	123684697	123684887	chr4:123684697-123684887@@FGF2_1==wt
chr4	123684717	123684907	chr4:123684717-123684907@@FGF2_1==wt
chr4	123684737	123684927	chr4:123684737-123684927@@FGF2_1==wt
chr4	123684757	123684947	chr4:123684757-123684947@@FGF2_1==wt
chr4	123684777	123684967	chr4:123684777-123684967@@FGF2_1==wt
chr4	123684797	123684987	chr4:123684797-123684987@@FGF2_1==wt
chr4	123684817	123685007	chr4:123684817-123685007@@FGF2_1==wt
chr4	123684837	123685027	chr4:123684837-123685027@@FGF2_1==wt
chr4	123684857	123685047	chr4:123684857-123685047@@FGF2_1==wt
chr4	123684877	123685067	chr4:123684877-123685067@@FGF2_1==wt
chr4	123684897	123685087	chr4:123684897-123685087@@FGF2_1==wt
chr4	123684917	123685107	chr4:123684917-123685107@@FGF2_1==wt
chr4	123684937	123685127	chr4:123684937-123685127@@FGF2_1==wt
chr4	123684957	123685147	chr4:123684957-123685147@@FGF2_1==wt
chr4	123684977	123685167	chr4:123684977-123685167@@FGF2_1==wt
chr4	123684997	123685187	chr4:123684997-123685187@@FGF2_1==wt
chr4	123685017	123685207	chr4:123685017-123685207@@FGF2_1==wt
chr4	123685037	123685227	chr4:123685037-123685227@@FGF2_1==wt
chr4	123685057	123685247	chr4:123685057-123685247@@FGF2_1==wt
chr4	123685077	123685267	chr4:123685077-123685267@@FGF2_1==wt
chr4	123685097	123685287	chr4:123685097-123685287@@FGF2_1==wt
chr4	123685117	123685307	chr4:123685117-123685307@@FGF2_1==wt
chr4	123685137	123685327	chr4:123685137-123685327@@FGF2_1==wt
chr4	123685157	123685347	chr4:123685157-123685347@@FGF2_1==wt
chr4	123685177	123685367	chr4:123685177-123685367@@FGF2_1==wt
chr4	123685197	123685387	chr4:123685197-123685387@@FGF2_1==wt
chr4	123685217	123685407	chr4:123685217-123685407@@FGF2_1==wt
chr4	123685237	123685427	chr4:123685237-123685427@@FGF2_1==wt
chr4	123685257	123685447	chr4:123685257-123685447@@FGF2_1==wt
chr4	123685277	123685467	chr4:123685277-123685467@@FGF2_1==wt
chr4	123685297	123685487	chr4:123685297-123685487@@FGF2_1==wt
chr4	123685317	123685507	chr4:123685317-123685507@@FGF2_1==wt
chr4	123685337	123685527	chr4:123685337-123685527@@FGF2_1==wt
chr4	123685357	123685547	chr4:123685357-123685547@@FGF2_1==wt
chr4	123685377	123685567	chr4:123685377-123685567@@FGF2_1==wt
chr4	123685397	123685587	chr4:123685397-123685587@@FGF2_1==wt
chr4	123685417	123685607	chr4:123685417-123685607@@FGF2_1==wt
chr4	123685437	123685627	chr4:123685437-123685627@@FGF2_1==wt
chr4	123685457	123685647	chr4:123685457-123685647@@FGF2_1==wt
chr4	123685477	123685667	chr4:123685477-123685667@@FGF2_1==wt
chr4	123685497	123685687	chr4:123685497-123685687@@FGF2_1==wt
chr4	123685517	123685707	chr4:123685517-123685707@@FGF2_1==wt
chr4	123685537	123685727	chr4:123685537-123685727@@FGF2_1==wt
chr4	123685557	123685747	chr4:123685557-123685747@@FGF2_1==wt
chr4	123685577	123685767	chr4:123685577-123685767@@FGF2_1==wt
chr4	123685597	123685787	chr4:123685597-123685787@@FGF2_1==wt
chr4	123685617	123685807	chr4:123685617-123685807@@FGF2_1==wt
chr4	123685637	123685827	chr4:123685637-123685827@@FGF2_1==wt
chr4	123685657	123685847	chr4:123685657-123685847@@FGF2_1==wt
chr4	123685677	123685867	chr4:123685677-123685867@@FGF2_1==wt
chr4	123685697	123685887	chr4:123685697-123685887@@FGF2_1==wt
chr4	123685717	123685907	chr4:123685717-123685907@@FGF2_1==wt
chr4	123685737	123685927	chr4:123685737-123685927@@FGF2_1==wt
chr4	123685757	123685947	chr4:123685757-123685947@@FGF2_1==wt
chr4	123685777	123685967	chr4:123685777-123685967@@FGF2_1==wt
chr4	123685797	123685987	chr4:123685797-123685987@@FGF2_1==wt
chr4	123685817	123686007	chr4:123685817-123686007@@FGF2_1==wt
chr4	123685837	123686027	chr4:123685837-123686027@@FGF2_1==wt
chr4	123685857	123686047	chr4:123685857-123686047@@FGF2_1==wt
chr4	123685877	123686067	chr4:123685877-123686067@@FGF2_1==wt
chr4	123685897	123686087	chr4:123685897-123686087@@FGF2_1==wt
chr4	123685917	123686107	chr4:123685917-123686107@@FGF2_1==wt
chr4	123685937	123686127	chr4:123685937-123686127@@FGF2_1==wt
chr4	123685957	123686147	chr4:123685957-123686147@@FGF2_1==wt
chr4	123685977	123686167	chr4:123685977-123686167@@FGF2_1==wt
chr4	123685997	123686187	chr4:123685997-123686187@@FGF2_1==wt
chr4	123686017	123686207	chr4:123686017-123686207@@FGF2_1==wt
chr4	123686037	123686227	chr4:123686037-123686227@@FGF2_1==wt
chr4	123686057	123686247	chr4:123686057-123686247@@FGF2_1==wt
chr4	123686077	123686267	chr4:123686077-123686267@@FGF2_1==wt
chr4	123686097	123686287	chr4:123686097-123686287@@FGF2_1==wt
chr4	123686117	123686307	chr4:123686117-123686307@@FGF2_1==wt
chr4	123686137	123686327	chr4:123686137-123686327@@FGF2_1==wt
chr4	123686157	123686347	chr4:123686157-123686347@@FGF2_1==wt
chr4	123686177	123686367	chr4:123686177-123686367@@FGF2_1==wt
chr4	123686197	123686387	chr4:123686197-123686387@@FGF2_1==wt
chr4	123686217	123686407	chr4:123686217-123686407@@FGF2_1==wt
chr4	123686237	123686427	chr4:123686237-123686427@@FGF2_1==wt
chr4	123686257	123686447	chr4:123686257-123686447@@FGF2_1==wt
chr4	123686277	123686467	chr4:123686277-123686467@@FGF2_1==wt
chr4	123686297	123686487	chr4:123686297-123686487@@FGF2_1==wt
chr4	123686317	123686507	chr4:123686317-123686507@@FGF2_1==wt
chr4	123686337	123686527	chr4:123686337-123686527@@FGF2_1==wt
chr4	123686357	123686547	chr4:123686357-123686547@@FGF2_1==wt
chr4	123686377	123686567	chr4:123686377-123686567@@FGF2_1==wt
chr4	123686397	123686587	chr4:123686397-123686587@@FGF2_1==wt
chr4	123686417	123686607	chr4:123686417-123686607@@FGF2_1==wt
chr4	123686437	123686627	chr4:123686437-123686627@@FGF2_1==wt
chr4	123686457	123686647	chr4:123686457-123686647@@FGF2_1==wt
chr4	123686477	123686667	chr4:123686477-123686667@@FGF2_1==wt
chr4	123686497	123686687	chr4:123686497-123686687@@FGF2_1==wt
chr4	123686517	123686707	chr4:123686517-123686707@@FGF2_1==wt
chr4	123686537	123686727	chr4:123686537-123686727@@FGF2_1==wt
chr4	123686557	123686747	chr4:123686557-123686747@@FGF2_1==wt
chr4	123686577	123686767	chr4:123686577-123686767@@FGF2_1==wt
chr4	123686597	123686787	chr4:123686597-123686787@@FGF2_1==wt
chr4	123686617	123686807	chr4:123686617-123686807@@FGF2_1==wt
chr4	123686637	123686827	chr4:123686637-123686827@@FGF2_1==wt
chr4	123686657	123686847	chr4:123686657-123686847@@FGF2_1==wt
chr4	123686677	123686867	chr4:123686677-123686867@@FGF2_1==wt
chr4	123686697	123686887	chr4:123686697-123686887@@FGF2_1==wt
chr4	123686717	123686907	chr4:123686717-123686907@@FGF2_1==wt
chr4	123686737	123686927	chr4:123686737-123686927@@FGF2_1==wt
chr4	123686757	123686947	chr4:123686757-123686947@@FGF2_1==wt
chr4	123686777	123686967	chr4:123686777-123686967@@FGF2_1==wt
chr4	123686797	123686987	chr4:123686797-123686987@@FGF2_1==wt
chr4	123686817	123687007	chr4:123686817-123687007@@FGF2_1==wt
chr4	123686837	123687027	chr4:123686837-123687027@@FGF2_1==wt
chr4	123686857	123687047	chr4:123686857-123687047@@FGF2_1==wt
chr4	123703105	123703295	chr4:123703105-123703295@@FGF2_2==wt
chr4	123703125	123703315	chr4:123703125-123703315@@FGF2_2==wt
chr4	123703145	123703335	chr4:123703145-123703335@@FGF2_2==wt
chr4	123703165	123703355	chr4:123703165-123703355@@FGF2_2==wt
chr4	123703185	123703375	chr4:123703185-123703375@@FGF2_2==wt
chr4	123703205	123703395	chr4:123703205-123703395@@FGF2_2==wt
chr4	123703225	123703415	chr4:123703225-123703415@@FGF2_2==wt
chr4	123703245	123703435	chr4:123703245-123703435@@FGF2_2==wt
chr4	123703265	123703455	chr4:123703265-123703455@@FGF2_2==wt
chr4	123703285	123703475	chr4:123703285-123703475@@FGF2_2==wt
chr4	123703305	123703495	chr4:123703305-123703495@@FGF2_2==wt
chr4	123703325	123703515	chr4:123703325-123703515@@FGF2_2==wt
chr4	123703345	123703535	chr4:123703345-123703535@@FGF2_2==wt
chr4	123703365	123703555	chr4:123703365-123703555@@FGF2_2==wt
chr4	123703385	123703575	chr4:123703385-123703575@@FGF2_2==wt
chr4	123703405	123703595	chr4:123703405-123703595@@FGF2_2==mut_cisbp_M5907_chr4
chr4	123703425	123703615	chr4:123703425-123703615@@FGF2_2==mut_cisbp_M5907_chr4
chr4	123703445	123703635	chr4:123703445-123703635@@FGF2_2==mut_cisbp_M5907_chr4
chr4	123703465	123703655	chr4:123703465-123703655@@FGF2_2==mut_cisbp_M5907_chr4
chr4	123703485	123703675	chr4:123703485-123703675@@FGF2_2==mut_cisbp_M5907_chr4
chr4	123703505	123703695	chr4:123703505-123703695@@FGF2_2==mut_cisbp_M5907_chr4
chr4	123703525	123703715	chr4:123703525-123703715@@FGF2_2==mut_cisbp_M5907_chr4
chr4	123703545	123703735	chr4:123703545-123703735@@FGF2_2==mut_cisbp_M5907_chr4
chr4	123703565	123703755	chr4:123703565-123703755@@FGF2_2==mut_cisbp_M5907_chr4
chr4	123703585	123703775	chr4:123703585-123703775@@FGF2_2==wt
chr4	123703605	123703795	chr4:123703605-123703795@@FGF2_2==wt
chr4	123703625	123703815	chr4:123703625-123703815@@FGF2_2==wt
chr4	123703645	123703835	chr4:123703645-123703835@@FGF2_2==wt
chr4	123703665	123703855	chr4:123703665-123703855@@FGF2_2==wt
chr4	123703685	123703875	chr4:123703685-123703875@@FGF2_2==wt
chr4	123703705	123703895	chr4:123703705-123703895@@FGF2_2==wt
chr4	123703725	123703915	chr4:123703725-123703915@@FGF2_2==wt
chr4	123703745	123703935	chr4:123703745-123703935@@FGF2_2==wt
chr4	123703765	123703955	chr4:123703765-123703955@@FGF2_2==wt
chr4	123703785	123703975	chr4:123703785-123703975@@FGF2_2==wt
chr4	123703805	123703995	chr4:123703805-123703995@@FGF2_2==wt
chr4	123703825	123704015	chr4:123703825-123704015@@FGF2_2==wt
chr4	123703845	123704035	chr4:123703845-123704035@@FGF2_2==wt
chr4	123703865	123704055	chr4:123703865-123704055@@FGF2_2==wt
chr4	123703885	123704075	chr4:123703885-123704075@@FGF2_2==wt
chr4	123703905	123704095	chr4:123703905-123704095@@FGF2_2==wt
chr4	123703925	123704115	chr4:123703925-123704115@@FGF2_2==wt
chr4	123703945	123704135	chr4:123703945-123704135@@FGF2_2==wt
chr4	123703965	123704155	chr4:123703965-123704155@@FGF2_2==wt
chr4	123703985	123704175	chr4:123703985-123704175@@FGF2_2==wt
chr4	123704005	123704195	chr4:123704005-123704195@@FGF2_2==wt
chr4	123704025	123704215	chr4:123704025-123704215@@FGF2_2==wt
chr4	123704045	123704235	chr4:123704045-123704235@@FGF2_2==wt
chr4	123704065	123704255	chr4:123704065-123704255@@FGF2_2==wt
chr4	123704085	123704275	chr4:123704085-123704275@@FGF2_2==wt
chr4	123704105	123704295	chr4:123704105-123704295@@FGF2_2==wt
chr4	123704125	123704315	chr4:123704125-123704315@@FGF2_2==wt
chr4	123704145	123704335	chr4:123704145-123704335@@FGF2_2==wt
chr4	123704165	123704355	chr4:123704165-123704355@@FGF2_2==wt
chr4	123704185	123704375	chr4:123704185-123704375@@FGF2_2==wt
chr4	123704205	123704395	chr4:123704205-123704395@@FGF2_2==wt
chr4	123704225	123704415	chr4:123704225-123704415@@FGF2_2==wt
chr4	123704245	123704435	chr4:123704245-123704435@@FGF2_2==wt
chr4	123704265	123704455	chr4:123704265-123704455@@FGF2_2==wt
chr4	123704285	123704475	chr4:123704285-123704475@@FGF2_2==wt
chr4	123704305	123704495	chr4:123704305-123704495@@FGF2_2==wt
chr4	123704325	123704515	chr4:123704325-123704515@@FGF2_2==wt
chr4	123704345	123704535	chr4:123704345-123704535@@FGF2_2==wt
chr4	123704365	123704555	chr4:123704365-123704555@@FGF2_2==wt
chr4	123704385	123704575	chr4:123704385-123704575@@FGF2_2==wt
chr4	123704405	123704595	chr4:123704405-123704595@@FGF2_2==mut_cisbp_M5907_chr4
chr4	123704425	123704615	chr4:123704425-123704615@@FGF2_2==mut_cisbp_M5907_chr4
chr4	123704445	123704635	chr4:123704445-123704635@@FGF2_2==mut_cisbp_M5907_chr4
chr4	123704465	123704655	chr4:123704465-123704655@@FGF2_2==mut_cisbp_M5907_chr4
chr4	123704485	123704675	chr4:123704485-123704675@@FGF2_2==mut_cisbp_M5907_chr4
chr4	123704505	123704695	chr4:123704505-123704695@@FGF2_2==mut_cisbp_M5907_chr4
chr4	123704525	123704715	chr4:123704525-123704715@@FGF2_2==mut_cisbp_M5907_chr4
chr4	123704545	123704735	chr4:123704545-123704735@@FGF2_2==mut_cisbp_M5907_chr4
chr4	123704565	123704755	chr4:123704565-123704755@@FGF2_2==mut_cisbp_M5907_chr4
chr4	123704585	123704775	chr4:123704585-123704775@@FGF2_2==wt
chr4	123704605	123704795	chr4:123704605-123704795@@FGF2_2==wt
chr4	123704625	123704815	chr4:123704625-123704815@@FGF2_2==wt
chr4	123704645	123704835	chr4:123704645-123704835@@FGF2_2==wt
chr4	123704665	123704855	chr4:123704665-123704855@@FGF2_2==wt
chr4	123704685	123704875	chr4:123704685-123704875@@FGF2_2==wt
chr4	123704705	123704895	chr4:123704705-123704895@@FGF2_2==wt
chr4	123704725	123704915	chr4:123704725-123704915@@FGF2_2==wt
chr4	123704745	123704935	chr4:123704745-123704935@@FGF2_2==wt
chr4	123704765	123704955	chr4:123704765-123704955@@FGF2_2==wt
chr4	123704785	123704975	chr4:123704785-123704975@@FGF2_2==wt
chr4	123704805	123704995	chr4:123704805-123704995@@FGF2_2==wt
chr4	123704825	123705015	chr4:123704825-123705015@@FGF2_2==wt
chr4	123704845	123705035	chr4:123704845-123705035@@FGF2_2==wt
chr4	123704865	123705055	chr4:123704865-123705055@@FGF2_2==wt
chr4	123704885	123705075	chr4:123704885-123705075@@FGF2_2==wt
chr4	123704905	123705095	chr4:123704905-123705095@@FGF2_2==wt
chr4	123704925	123705115	chr4:123704925-123705115@@FGF2_2==wt
chr4	123704945	123705135	chr4:123704945-123705135@@FGF2_2==wt
chr4	123704965	123705155	chr4:123704965-123705155@@FGF2_2==wt
chr4	123704985	123705175	chr4:123704985-123705175@@FGF2_2==wt
chr4	123705005	123705195	chr4:123705005-123705195@@FGF2_2==wt
chr4	123705025	123705215	chr4:123705025-123705215@@FGF2_2==wt
chr4	123705045	123705235	chr4:123705045-123705235@@FGF2_2==wt
chr4	123705065	123705255	chr4:123705065-123705255@@FGF2_2==wt
chr4	123705085	123705275	chr4:123705085-123705275@@FGF2_2==wt
chr4	123705105	123705295	chr4:123705105-123705295@@FGF2_2==wt
chr4	123705125	123705315	chr4:123705125-123705315@@FGF2_2==wt
chr4	123705145	123705335	chr4:123705145-123705335@@FGF2_2==wt
chr4	123705165	123705355	chr4:123705165-123705355@@FGF2_2==wt
chr4	123705185	123705375	chr4:123705185-123705375@@FGF2_2==wt
chr4	123705205	123705395	chr4:123705205-123705395@@FGF2_2==wt
chr4	123705225	123705415	chr4:123705225-123705415@@FGF2_2==wt
chr4	123705245	123705435	chr4:123705245-123705435@@FGF2_2==wt
chr4	123705265	123705455	chr4:123705265-123705455@@FGF2_2==wt
chr4	123705285	123705475	chr4:123705285-123705475@@FGF2_2==wt
chr4	123705305	123705495	chr4:123705305-123705495@@FGF2_2==wt
chr4	123705325	123705515	chr4:123705325-123705515@@FGF2_2==wt
chr4	123705345	123705535	chr4:123705345-123705535@@FGF2_2==wt
chr4	123705365	123705555	chr4:123705365-123705555@@FGF2_2==wt
chr4	123705385	123705575	chr4:123705385-123705575@@FGF2_2==wt
chr4	123705405	123705595	chr4:123705405-123705595@@FGF2_2==wt
chr4	123705425	123705615	chr4:123705425-123705615@@FGF2_2==wt
chr4	123705445	123705635	chr4:123705445-123705635@@FGF2_2==wt
chr4	123705465	123705655	chr4:123705465-123705655@@FGF2_2==wt
chr5	155902513	155902703	chr5:155902513-155902703@@SGCD_2==wt
chr5	155902533	155902723	chr5:155902533-155902723@@SGCD_2==wt
chr5	155902553	155902743	chr5:155902553-155902743@@SGCD_2==wt
chr5	155902573	155902763	chr5:155902573-155902763@@SGCD_2==wt
chr5	155902593	155902783	chr5:155902593-155902783@@SGCD_2==wt
chr5	155902613	155902803	chr5:155902613-155902803@@SGCD_2==wt
chr5	155902633	155902823	chr5:155902633-155902823@@SGCD_2==wt
chr5	155902653	155902843	chr5:155902653-155902843@@SGCD_2==wt
chr5	155902673	155902863	chr5:155902673-155902863@@SGCD_2==wt
chr5	155902693	155902883	chr5:155902693-155902883@@SGCD_2==wt
chr5	155902713	155902903	chr5:155902713-155902903@@SGCD_2==wt
chr5	155902733	155902923	chr5:155902733-155902923@@SGCD_2==wt
chr5	155902753	155902943	chr5:155902753-155902943@@SGCD_2==mut_cisbp_M5907_chr5
chr5	155902773	155902963	chr5:155902773-155902963@@SGCD_2==mut_cisbp_M5907_chr5
chr5	155902793	155902983	chr5:155902793-155902983@@SGCD_2==mut_cisbp_M5907_chr5
chr5	155902813	155903003	chr5:155902813-155903003@@SGCD_2==mut_cisbp_M5907_chr5
chr5	155902833	155903023	chr5:155902833-155903023@@SGCD_2==mut_cisbp_M5907_chr5
chr5	155902853	155903043	chr5:155902853-155903043@@SGCD_2==mut_cisbp_M5907_chr5
chr5	155902873	155903063	chr5:155902873-155903063@@SGCD_2==mut_cisbp_M5907_chr5
chr5	155902893	155903083	chr5:155902893-155903083@@SGCD_2==mut_cisbp_M5907_chr5
chr5	155902913	155903103	chr5:155902913-155903103@@SGCD_2==mut_cisbp_M5907_chr5
chr5	155902933	155903123	chr5:155902933-155903123@@SGCD_2==wt
chr5	155902953	155903143	chr5:155902953-155903143@@SGCD_2==wt
chr5	155902973	155903163	chr5:155902973-155903163@@SGCD_2==wt
chr5	155902993	155903183	chr5:155902993-155903183@@SGCD_2==wt
chr5	155903013	155903203	chr5:155903013-155903203@@SGCD_2==wt
chr5	155903033	155903223	chr5:155903033-155903223@@SGCD_2==wt
chr5	155903053	155903243	chr5:155903053-155903243@@SGCD_2==wt
chr5	155903073	155903263	chr5:155903073-155903263@@SGCD_2==wt
chr5	155903093	155903283	chr5:155903093-155903283@@SGCD_2==wt
chr5	155903113	155903303	chr5:155903113-155903303@@SGCD_2==wt
chr5	155903133	155903323	chr5:155903133-155903323@@SGCD_2==wt
chr5	155903153	155903343	chr5:155903153-155903343@@SGCD_2==mut_cisbp_M5907_chr5
chr5	155903173	155903363	chr5:155903173-155903363@@SGCD_2==mut_cisbp_M5907_chr5
chr5	155903193	155903383	chr5:155903193-155903383@@SGCD_2==mut_cisbp_M5907_chr5
chr5	155903213	155903403	chr5:155903213-155903403@@SGCD_2==mut_cisbp_M5907_chr5
chr5	155903233	155903423	chr5:155903233-155903423@@SGCD_2==mut_cisbp_M5907_chr5
chr5	155903253	155903443	chr5:155903253-155903443@@SGCD_2==mut_cisbp_M5907_chr5
chr5	155903273	155903463	chr5:155903273-155903463@@SGCD_2==mut_cisbp_M5907_chr5
chr5	155903293	155903483	chr5:155903293-155903483@@SGCD_2==mut_cisbp_M5907_chr5
chr5	155903313	155903503	chr5:155903313-155903503@@SGCD_2==mut_cisbp_M5907_chr5
chr5	155903333	155903523	chr5:155903333-155903523@@SGCD_2==mut_cisbp_M5907_chr5
chr5	155903353	155903543	chr5:155903353-155903543@@SGCD_2==wt
chr5	155903373	155903563	chr5:155903373-155903563@@SGCD_2==wt
chr5	155903393	155903583	chr5:155903393-155903583@@SGCD_2==wt
chr5	155903413	155903603	chr5:155903413-155903603@@SGCD_2==wt
chr5	155903433	155903623	chr5:155903433-155903623@@SGCD_2==wt
chr5	155903453	155903643	chr5:155903453-155903643@@SGCD_2==wt
chr5	155903473	155903663	chr5:155903473-155903663@@SGCD_2==wt
chr5	155903493	155903683	chr5:155903493-155903683@@SGCD_2==wt
chr5	155903513	155903703	chr5:155903513-155903703@@SGCD_2==wt
chr5	155903533	155903723	chr5:155903533-155903723@@SGCD_2==wt
chr5	155903553	155903743	chr5:155903553-155903743@@SGCD_2==wt
chr5	155903573	155903763	chr5:155903573-155903763@@SGCD_2==wt
chr5	155903593	155903783	chr5:155903593-155903783@@SGCD_2==wt
chr5	155903613	155903803	chr5:155903613-155903803@@SGCD_2==wt
chr5	155903633	155903823	chr5:155903633-155903823@@SGCD_2==wt
chr5	155903653	155903843	chr5:155903653-155903843@@SGCD_2==wt
chr5	155903673	155903863	chr5:155903673-155903863@@SGCD_2==wt
chr5	155903693	155903883	chr5:155903693-155903883@@SGCD_2==wt
chr5	155903713	155903903	chr5:155903713-155903903@@SGCD_2==wt
chr5	155903733	155903923	chr5:155903733-155903923@@SGCD_2==wt
chr5	155903753	155903943	chr5:155903753-155903943@@SGCD_2==wt
chr5	155903773	155903963	chr5:155903773-155903963@@SGCD_2==wt
chr5	155903793	155903983	chr5:155903793-155903983@@SGCD_2==wt
chr5	155903813	155904003	chr5:155903813-155904003@@SGCD_2==wt
chr5	155903833	155904023	chr5:155903833-155904023@@SGCD_2==wt
chr5	155903853	155904043	chr5:155903853-155904043@@SGCD_2==wt
chr5	155903873	155904063	chr5:155903873-155904063@@SGCD_2==wt
chr5	155903893	155904083	chr5:155903893-155904083@@SGCD_2==wt
chr5	155903913	155904103	chr5:155903913-155904103@@SGCD_2==wt
chr5	155903933	155904123	chr5:155903933-155904123@@SGCD_2==wt
chr5	155903953	155904143	chr5:155903953-155904143@@SGCD_2==wt
chr5	155903973	155904163	chr5:155903973-155904163@@SGCD_2==wt
chr5	155903993	155904183	chr5:155903993-155904183@@SGCD_2==wt
chr5	155904013	155904203	chr5:155904013-155904203@@SGCD_2==wt
chr5	155904033	155904223	chr5:155904033-155904223@@SGCD_2==wt
chr5	155904053	155904243	chr5:155904053-155904243@@SGCD_2==wt
chr5	155904073	155904263	chr5:155904073-155904263@@SGCD_2==wt
chr5	155904093	155904283	chr5:155904093-155904283@@SGCD_2==wt
chr5	155904113	155904303	chr5:155904113-155904303@@SGCD_2==wt
chr5	155904133	155904323	chr5:155904133-155904323@@SGCD_2==wt
chr5	155904153	155904343	chr5:155904153-155904343@@SGCD_2==wt
chr5	155904173	155904363	chr5:155904173-155904363@@SGCD_2==wt
chr5	155904193	155904383	chr5:155904193-155904383@@SGCD_2==wt
chr5	155904213	155904403	chr5:155904213-155904403@@SGCD_2==wt
chr5	155904233	155904423	chr5:155904233-155904423@@SGCD_2==wt
chr5	155904253	155904443	chr5:155904253-155904443@@SGCD_2==wt
chr5	155904273	155904463	chr5:155904273-155904463@@SGCD_2==wt
chr5	155904293	155904483	chr5:155904293-155904483@@SGCD_2==wt
chr5	155904313	155904503	chr5:155904313-155904503@@SGCD_2==wt
chr5	155904333	155904523	chr5:155904333-155904523@@SGCD_2==wt
chr5	155904353	155904543	chr5:155904353-155904543@@SGCD_2==wt
chr5	155904373	155904563	chr5:155904373-155904563@@SGCD_2==wt
chr5	155904393	155904583	chr5:155904393-155904583@@SGCD_2==wt
chr5	155904413	155904603	chr5:155904413-155904603@@SGCD_2==wt
chr5	155904433	155904623	chr5:155904433-155904623@@SGCD_2==wt
chr5	155904453	155904643	chr5:155904453-155904643@@SGCD_2==wt
chr5	155904473	155904663	chr5:155904473-155904663@@SGCD_2==wt
chr5	155904493	155904683	chr5:155904493-155904683@@SGCD_2==wt
chr5	155904513	155904703	chr5:155904513-155904703@@SGCD_2==wt
chr5	155904533	155904723	chr5:155904533-155904723@@SGCD_2==wt
chr5	156015784	156015974	chr5:156015784-156015974@@SGCD_3==wt
chr5	156015804	156015994	chr5:156015804-156015994@@SGCD_3==wt
chr5	156015824	156016014	chr5:156015824-156016014@@SGCD_3==wt
chr5	156015844	156016034	chr5:156015844-156016034@@SGCD_3==wt
chr5	156015864	156016054	chr5:156015864-156016054@@SGCD_3==wt
chr5	156015884	156016074	chr5:156015884-156016074@@SGCD_3==wt
chr5	156015904	156016094	chr5:156015904-156016094@@SGCD_3==wt
chr5	156015924	156016114	chr5:156015924-156016114@@SGCD_3==wt
chr5	156015944	156016134	chr5:156015944-156016134@@SGCD_3==wt
chr5	156015964	156016154	chr5:156015964-156016154@@SGCD_3==wt
chr5	156015984	156016174	chr5:156015984-156016174@@SGCD_3==wt
chr5	156016004	156016194	chr5:156016004-156016194@@SGCD_3==wt
chr5	156016024	156016214	chr5:156016024-156016214@@SGCD_3==wt
chr5	156016044	156016234	chr5:156016044-156016234@@SGCD_3==wt
chr5	156016064	156016254	chr5:156016064-156016254@@SGCD_3==wt
chr5	156016084	156016274	chr5:156016084-156016274@@SGCD_3==wt
chr5	156016104	156016294	chr5:156016104-156016294@@SGCD_3==wt
chr5	156016124	156016314	chr5:156016124-156016314@@SGCD_3==wt
chr5	156016144	156016334	chr5:156016144-156016334@@SGCD_3==wt
chr5	156016164	156016354	chr5:156016164-156016354@@SGCD_3==wt
chr5	156016184	156016374	chr5:156016184-156016374@@SGCD_3==wt
chr5	156016204	156016394	chr5:156016204-156016394@@SGCD_3==wt
chr5	156016224	156016414	chr5:156016224-156016414@@SGCD_3==wt
chr5	156016244	156016434	chr5:156016244-156016434@@SGCD_3==wt
chr5	156016264	156016454	chr5:156016264-156016454@@SGCD_3==wt
chr5	156016284	156016474	chr5:156016284-156016474@@SGCD_3==wt
chr5	156016304	156016494	chr5:156016304-156016494@@SGCD_3==wt
chr5	156016324	156016514	chr5:156016324-156016514@@SGCD_3==wt
chr5	156016344	156016534	chr5:156016344-156016534@@SGCD_3==wt
chr5	156016364	156016554	chr5:156016364-156016554@@SGCD_3==wt
chr5	156016384	156016574	chr5:156016384-156016574@@SGCD_3==wt
chr5	156016404	156016594	chr5:156016404-156016594@@SGCD_3==wt
chr5	156016424	156016614	chr5:156016424-156016614@@SGCD_3==wt
chr5	156016444	156016634	chr5:156016444-156016634@@SGCD_3==wt
chr5	156016464	156016654	chr5:156016464-156016654@@SGCD_3==wt
chr5	156016484	156016674	chr5:156016484-156016674@@SGCD_3==wt
chr5	156016504	156016694	chr5:156016504-156016694@@SGCD_3==wt
chr5	156016524	156016714	chr5:156016524-156016714@@SGCD_3==wt
chr5	156016544	156016734	chr5:156016544-156016734@@SGCD_3==wt
chr5	156016564	156016754	chr5:156016564-156016754@@SGCD_3==wt
chr5	156016584	156016774	chr5:156016584-156016774@@SGCD_3==wt
chr5	156016604	156016794	chr5:156016604-156016794@@SGCD_3==wt
chr5	156016624	156016814	chr5:156016624-156016814@@SGCD_3==wt
chr5	156016644	156016834	chr5:156016644-156016834@@SGCD_3==wt
chr5	156016664	156016854	chr5:156016664-156016854@@SGCD_3==wt
chr5	156016684	156016874	chr5:156016684-156016874@@SGCD_3==wt
chr5	156016704	156016894	chr5:156016704-156016894@@SGCD_3==wt
chr5	156016724	156016914	chr5:156016724-156016914@@SGCD_3==wt
chr5	156016744	156016934	chr5:156016744-156016934@@SGCD_3==wt
chr5	156016764	156016954	chr5:156016764-156016954@@SGCD_3==wt
chr5	156016784	156016974	chr5:156016784-156016974@@SGCD_3==wt
chr5	156016804	156016994	chr5:156016804-156016994@@SGCD_3==wt
chr5	156016824	156017014	chr5:156016824-156017014@@SGCD_3==wt
chr5	156016844	156017034	chr5:156016844-156017034@@SGCD_3==wt
chr5	156016864	156017054	chr5:156016864-156017054@@SGCD_3==wt
chr5	156016884	156017074	chr5:156016884-156017074@@SGCD_3==wt
chr5	156016904	156017094	chr5:156016904-156017094@@SGCD_3==mut_cisbp_M5907_chr5
chr5	156016924	156017114	chr5:156016924-156017114@@SGCD_3==mut_cisbp_M5907_chr5
chr5	156016944	156017134	chr5:156016944-156017134@@SGCD_3==mut_cisbp_M5907_chr5
chr5	156016964	156017154	chr5:156016964-156017154@@SGCD_3==mut_cisbp_M5907_chr5
chr5	156016984	156017174	chr5:156016984-156017174@@SGCD_3==mut_cisbp_M5907_chr5
chr5	156017004	156017194	chr5:156017004-156017194@@SGCD_3==mut_cisbp_M5907_chr5
chr5	156017024	156017214	chr5:156017024-156017214@@SGCD_3==mut_cisbp_M5907_chr5
chr5	156017044	156017234	chr5:156017044-156017234@@SGCD_3==mut_cisbp_M5907_chr5
chr5	156017064	156017254	chr5:156017064-156017254@@SGCD_3==mut_cisbp_M5907_chr5
chr5	156017084	156017274	chr5:156017084-156017274@@SGCD_3==wt
chr5	156017104	156017294	chr5:156017104-156017294@@SGCD_3==wt
chr5	156017124	156017314	chr5:156017124-156017314@@SGCD_3==wt
chr5	156017144	156017334	chr5:156017144-156017334@@SGCD_3==wt
chr5	156017164	156017354	chr5:156017164-156017354@@SGCD_3==wt
chr5	156017184	156017374	chr5:156017184-156017374@@SGCD_3==wt
chr5	156017204	156017394	chr5:156017204-156017394@@SGCD_3==wt
chr5	156017224	156017414	chr5:156017224-156017414@@SGCD_3==wt
chr5	156017244	156017434	chr5:156017244-156017434@@SGCD_3==wt
chr5	156017264	156017454	chr5:156017264-156017454@@SGCD_3==wt
chr5	156017284	156017474	chr5:156017284-156017474@@SGCD_3==wt
chr5	156017304	156017494	chr5:156017304-156017494@@SGCD_3==wt
chr5	156017324	156017514	chr5:156017324-156017514@@SGCD_3==wt
chr5	156017344	156017534	chr5:156017344-156017534@@SGCD_3==wt
chr5	156017364	156017554	chr5:156017364-156017554@@SGCD_3==wt
chr5	156017384	156017574	chr5:156017384-156017574@@SGCD_3==wt
chr5	156017404	156017594	chr5:156017404-156017594@@SGCD_3==wt
chr5	156017424	156017614	chr5:156017424-156017614@@SGCD_3==wt
chr5	156017444	156017634	chr5:156017444-156017634@@SGCD_3==wt
chr5	156017464	156017654	chr5:156017464-156017654@@SGCD_3==wt
chr5	156017484	156017674	chr5:156017484-156017674@@SGCD_3==wt
chr5	156017504	156017694	chr5:156017504-156017694@@SGCD_3==wt
chr5	156017524	156017714	chr5:156017524-156017714@@SGCD_3==wt
chr5	156017544	156017734	chr5:156017544-156017734@@SGCD_3==wt
chr5	156017564	156017754	chr5:156017564-156017754@@SGCD_3==wt
chr5	156017584	156017774	chr5:156017584-156017774@@SGCD_3==wt
chr5	156017604	156017794	chr5:156017604-156017794@@SGCD_3==wt
chr5	156017624	156017814	chr5:156017624-156017814@@SGCD_3==wt
chr5	156017644	156017834	chr5:156017644-156017834@@SGCD_3==wt
chr5	156017664	156017854	chr5:156017664-156017854@@SGCD_3==wt
chr5	156017684	156017874	chr5:156017684-156017874@@SGCD_3==wt
chr5	156017704	156017894	chr5:156017704-156017894@@SGCD_3==wt
chr5	156017724	156017914	chr5:156017724-156017914@@SGCD_3==wt
chr5	156017744	156017934	chr5:156017744-156017934@@SGCD_3==wt
chr5	156017764	156017954	chr5:156017764-156017954@@SGCD_3==wt
chr5	156017784	156017974	chr5:156017784-156017974@@SGCD_3==wt
chr5	156017804	156017994	chr5:156017804-156017994@@SGCD_3==wt
chr5	156017824	156018014	chr5:156017824-156018014@@SGCD_3==wt
chr5	156017844	156018034	chr5:156017844-156018034@@SGCD_3==wt
chr5	156017864	156018054	chr5:156017864-156018054@@SGCD_3==wt
chr5	156017884	156018074	chr5:156017884-156018074@@SGCD_3==wt
chr5	156017904	156018094	chr5:156017904-156018094@@SGCD_3==wt
chr5	156017924	156018114	chr5:156017924-156018114@@SGCD_3==wt
chr5	156017944	156018134	chr5:156017944-156018134@@SGCD_3==wt
chr5	156017964	156018154	chr5:156017964-156018154@@SGCD_3==wt
chr5	156017984	156018174	chr5:156017984-156018174@@SGCD_3==wt
chr5	156018004	156018194	chr5:156018004-156018194@@SGCD_3==wt
chr6	395245	395435	chr6:395245-395435@@IRF4_1==wt
chr6	395265	395455	chr6:395265-395455@@IRF4_1==wt
chr6	395285	395475	chr6:395285-395475@@IRF4_1==wt
chr6	395305	395495	chr6:395305-395495@@IRF4_1==wt
chr6	395325	395515	chr6:395325-395515@@IRF4_1==wt
chr6	395345	395535	chr6:395345-395535@@IRF4_1==wt
chr6	395365	395555	chr6:395365-395555@@IRF4_1==wt
chr6	395385	395575	chr6:395385-395575@@IRF4_1==wt
chr6	395405	395595	chr6:395405-395595@@IRF4_1==wt
chr6	395425	395615	chr6:395425-395615@@IRF4_1==wt
chr6	395445	395635	chr6:395445-395635@@IRF4_1==wt
chr6	395465	395655	chr6:395465-395655@@IRF4_1==wt
chr6	395485	395675	chr6:395485-395675@@IRF4_1==wt
chr6	395505	395695	chr6:395505-395695@@IRF4_1==wt
chr6	395525	395715	chr6:395525-395715@@IRF4_1==wt
chr6	395545	395735	chr6:395545-395735@@IRF4_1==wt
chr6	395565	395755	chr6:395565-395755@@IRF4_1==wt
chr6	395585	395775	chr6:395585-395775@@IRF4_1==wt
chr6	395605	395795	chr6:395605-395795@@IRF4_1==wt
chr6	395625	395815	chr6:395625-395815@@IRF4_1==wt
chr6	395645	395835	chr6:395645-395835@@IRF4_1==wt
chr6	395665	395855	chr6:395665-395855@@IRF4_1==wt
chr6	395685	395875	chr6:395685-395875@@IRF4_1==wt
chr6	395705	395895	chr6:395705-395895@@IRF4_1==wt
chr6	395725	395915	chr6:395725-395915@@IRF4_1==wt
chr6	395745	395935	chr6:395745-395935@@IRF4_1==wt
chr6	395765	395955	chr6:395765-395955@@IRF4_1==wt
chr6	395785	395975	chr6:395785-395975@@IRF4_1==wt
chr6	395805	395995	chr6:395805-395995@@IRF4_1==wt
chr6	395825	396015	chr6:395825-396015@@IRF4_1==wt
chr6	395845	396035	chr6:395845-396035@@IRF4_1==wt
chr6	395865	396055	chr6:395865-396055@@IRF4_1==wt
chr6	395885	396075	chr6:395885-396075@@IRF4_1==wt
chr6	395905	396095	chr6:395905-396095@@IRF4_1==wt
chr6	395925	396115	chr6:395925-396115@@IRF4_1==wt
chr6	395945	396135	chr6:395945-396135@@IRF4_1==wt
chr6	395965	396155	chr6:395965-396155@@IRF4_1==wt
chr6	395985	396175	chr6:395985-396175@@IRF4_1==wt
chr6	396005	396195	chr6:396005-396195@@IRF4_1==wt
chr6	396025	396215	chr6:396025-396215@@IRF4_1==wt
chr6	396045	396235	chr6:396045-396235@@IRF4_1==wt
chr6	396065	396255	chr6:396065-396255@@IRF4_1==wt
chr6	396085	396275	chr6:396085-396275@@IRF4_1==wt
chr6	396105	396295	chr6:396105-396295@@IRF4_1==wt
chr6	396125	396315	chr6:396125-396315@@IRF4_1==wt
chr6	396145	396335	chr6:396145-396335@@IRF4_1==wt
chr6	396165	396355	chr6:396165-396355@@IRF4_1==wt
chr6	396185	396375	chr6:396185-396375@@IRF4_1==wt
chr6	396205	396395	chr6:396205-396395@@IRF4_1==wt
chr6	396225	396415	chr6:396225-396415@@IRF4_1==wt
chr6	396245	396435	chr6:396245-396435@@IRF4_1==wt
chr6	396265	396455	chr6:396265-396455@@IRF4_1==wt
chr6	396285	396475	chr6:396285-396475@@IRF4_1==wt
chr6	396305	396495	chr6:396305-396495@@IRF4_1==wt
chr6	396325	396515	chr6:396325-396515@@IRF4_1==wt
chr6	396345	396535	chr6:396345-396535@@IRF4_1==wt
chr6	396365	396555	chr6:396365-396555@@IRF4_1==wt
chr6	396385	396575	chr6:396385-396575@@IRF4_1==wt
chr6	396405	396595	chr6:396405-396595@@IRF4_1==wt
chr6	396425	396615	chr6:396425-396615@@IRF4_1==wt
chr6	396445	396635	chr6:396445-396635@@IRF4_1==wt
chr6	396465	396655	chr6:396465-396655@@IRF4_1==wt
chr6	396485	396675	chr6:396485-396675@@IRF4_1==wt
chr6	396505	396695	chr6:396505-396695@@IRF4_1==wt
chr6	396525	396715	chr6:396525-396715@@IRF4_1==wt
chr6	396545	396735	chr6:396545-396735@@IRF4_1==wt
chr6	396565	396755	chr6:396565-396755@@IRF4_1==wt
chr6	396585	396775	chr6:396585-396775@@IRF4_1==wt
chr6	396605	396795	chr6:396605-396795@@IRF4_1==wt
chr6	396625	396815	chr6:396625-396815@@IRF4_1==wt
chr6	396645	396835	chr6:396645-396835@@IRF4_1==wt
chr6	396665	396855	chr6:396665-396855@@IRF4_1==wt
chr6	396685	396875	chr6:396685-396875@@IRF4_1==wt
chr6	396705	396895	chr6:396705-396895@@IRF4_1==wt
chr6	396725	396915	chr6:396725-396915@@IRF4_1==wt
chr6	396745	396935	chr6:396745-396935@@IRF4_1==wt
chr6	396765	396955	chr6:396765-396955@@IRF4_1==wt
chr6	396785	396975	chr6:396785-396975@@IRF4_1==wt
chr6	396805	396995	chr6:396805-396995@@IRF4_1==wt
chr6	396825	397015	chr6:396825-397015@@IRF4_1==wt
chr6	396845	397035	chr6:396845-397035@@IRF4_1==wt
chr6	396865	397055	chr6:396865-397055@@IRF4_1==wt
chr6	396885	397075	chr6:396885-397075@@IRF4_1==wt
chr6	396905	397095	chr6:396905-397095@@IRF4_1==wt
chr6	396925	397115	chr6:396925-397115@@IRF4_1==wt
chr6	396945	397135	chr6:396945-397135@@IRF4_1==wt
chr6	396965	397155	chr6:396965-397155@@IRF4_1==wt
chr6	396985	397175	chr6:396985-397175@@IRF4_1==wt
chr6	397005	397195	chr6:397005-397195@@IRF4_1==wt
chr6	12289604	12289794	chr6:12289604-12289794@@EDN1_1==mut_cisbp_M5907_chr6
chr6	12289624	12289814	chr6:12289624-12289814@@EDN1_1==mut_cisbp_M5907_chr6
chr6	12289644	12289834	chr6:12289644-12289834@@EDN1_1==mut_cisbp_M5907_chr6
chr6	12289664	12289854	chr6:12289664-12289854@@EDN1_1==wt
chr6	12289684	12289874	chr6:12289684-12289874@@EDN1_1==wt
chr6	12289704	12289894	chr6:12289704-12289894@@EDN1_1==wt
chr6	12289724	12289914	chr6:12289724-12289914@@EDN1_1==wt
chr6	12289744	12289934	chr6:12289744-12289934@@EDN1_1==wt
chr6	12289764	12289954	chr6:12289764-12289954@@EDN1_1==wt
chr6	12289784	12289974	chr6:12289784-12289974@@EDN1_1==wt
chr6	12289804	12289994	chr6:12289804-12289994@@EDN1_1==wt
chr6	12289824	12290014	chr6:12289824-12290014@@EDN1_1==wt
chr6	12289844	12290034	chr6:12289844-12290034@@EDN1_1==wt
chr6	12289864	12290054	chr6:12289864-12290054@@EDN1_1==wt
chr6	12289884	12290074	chr6:12289884-12290074@@EDN1_1==wt
chr6	12289904	12290094	chr6:12289904-12290094@@EDN1_1==wt
chr6	12289924	12290114	chr6:12289924-12290114@@EDN1_1==wt
chr6	12289944	12290134	chr6:12289944-12290134@@EDN1_1==wt
chr6	12289964	12290154	chr6:12289964-12290154@@EDN1_1==wt
chr6	12289984	12290174	chr6:12289984-12290174@@EDN1_1==wt
chr6	12290004	12290194	chr6:12290004-12290194@@EDN1_1==wt
chr6	12290024	12290214	chr6:12290024-12290214@@EDN1_1==wt
chr6	12290044	12290234	chr6:12290044-12290234@@EDN1_1==wt
chr6	12290064	12290254	chr6:12290064-12290254@@EDN1_1==wt
chr6	12290084	12290274	chr6:12290084-12290274@@EDN1_1==wt
chr6	12290104	12290294	chr6:12290104-12290294@@EDN1_1==wt
chr6	12290124	12290314	chr6:12290124-12290314@@EDN1_1==wt
chr6	12290144	12290334	chr6:12290144-12290334@@EDN1_1==wt
chr6	12290164	12290354	chr6:12290164-12290354@@EDN1_1==wt
chr6	12290184	12290374	chr6:12290184-12290374@@EDN1_1==wt
chr6	12290204	12290394	chr6:12290204-12290394@@EDN1_1==wt
chr6	12290224	12290414	chr6:12290224-12290414@@EDN1_1==wt
chr6	12290244	12290434	chr6:12290244-12290434@@EDN1_1==wt
chr6	12290264	12290454	chr6:12290264-12290454@@EDN1_1==wt
chr6	12290284	12290474	chr6:12290284-12290474@@EDN1_1==wt
chr6	12290304	12290494	chr6:12290304-12290494@@EDN1_1==wt
chr6	12290324	12290514	chr6:12290324-12290514@@EDN1_1==wt
chr6	12290344	12290534	chr6:12290344-12290534@@EDN1_1==wt
chr6	12290364	12290554	chr6:12290364-12290554@@EDN1_1==wt
chr6	12290384	12290574	chr6:12290384-12290574@@EDN1_1==wt
chr6	12290404	12290594	chr6:12290404-12290594@@EDN1_1==wt
chr6	12290424	12290614	chr6:12290424-12290614@@EDN1_1==wt
chr6	12290444	12290634	chr6:12290444-12290634@@EDN1_1==wt
chr6	12290464	12290654	chr6:12290464-12290654@@EDN1_1==wt
chr6	12290484	12290674	chr6:12290484-12290674@@EDN1_1==wt
chr6	12290504	12290694	chr6:12290504-12290694@@EDN1_1==wt
chr6	12290524	12290714	chr6:12290524-12290714@@EDN1_1==wt
chr6	12290544	12290734	chr6:12290544-12290734@@EDN1_1==wt
chr6	12290564	12290754	chr6:12290564-12290754@@EDN1_1==wt
chr6	12290584	12290774	chr6:12290584-12290774@@EDN1_1==wt
chr6	12290604	12290794	chr6:12290604-12290794@@EDN1_1==wt
chr6	12290624	12290814	chr6:12290624-12290814@@EDN1_1==wt
chr6	12290644	12290834	chr6:12290644-12290834@@EDN1_1==wt
chr6	12290664	12290854	chr6:12290664-12290854@@EDN1_1==wt
chr6	12290684	12290874	chr6:12290684-12290874@@EDN1_1==wt
chr6	12290704	12290894	chr6:12290704-12290894@@EDN1_1==wt
chr6	12290724	12290914	chr6:12290724-12290914@@EDN1_1==wt
chr6	12290744	12290934	chr6:12290744-12290934@@EDN1_1==wt
chr6	12290764	12290954	chr6:12290764-12290954@@EDN1_1==wt
chr6	12290784	12290974	chr6:12290784-12290974@@EDN1_1==wt
chr6	12290804	12290994	chr6:12290804-12290994@@EDN1_1==wt
chr6	12290824	12291014	chr6:12290824-12291014@@EDN1_1==wt
chr6	12290844	12291034	chr6:12290844-12291034@@EDN1_1==wt
chr6	12290864	12291054	chr6:12290864-12291054@@EDN1_1==wt
chr6	12290884	12291074	chr6:12290884-12291074@@EDN1_1==wt
chr6	12290904	12291094	chr6:12290904-12291094@@EDN1_1==wt
chr6	12290924	12291114	chr6:12290924-12291114@@EDN1_1==wt
chr6	12290944	12291134	chr6:12290944-12291134@@EDN1_1==wt
chr6	12290964	12291154	chr6:12290964-12291154@@EDN1_1==wt
chr6	12290984	12291174	chr6:12290984-12291174@@EDN1_1==wt
chr6	12291004	12291194	chr6:12291004-12291194@@EDN1_1==wt
chr6	12291024	12291214	chr6:12291024-12291214@@EDN1_1==wt
chr6	12291044	12291234	chr6:12291044-12291234@@EDN1_1==wt
chr6	12291064	12291254	chr6:12291064-12291254@@EDN1_1==wt
chr6	12291084	12291274	chr6:12291084-12291274@@EDN1_1==wt
chr6	12291104	12291294	chr6:12291104-12291294@@EDN1_1==wt
chr6	12572995	12573185	chr6:12572995-12573185@@EDN1_3==wt
chr6	12573015	12573205	chr6:12573015-12573205@@EDN1_3==wt
chr6	12573035	12573225	chr6:12573035-12573225@@EDN1_3==wt
chr6	12573055	12573245	chr6:12573055-12573245@@EDN1_3==wt
chr6	12573075	12573265	chr6:12573075-12573265@@EDN1_3==wt
chr6	12573095	12573285	chr6:12573095-12573285@@EDN1_3==wt
chr6	12573115	12573305	chr6:12573115-12573305@@EDN1_3==wt
chr6	12573135	12573325	chr6:12573135-12573325@@EDN1_3==wt
chr6	12573155	12573345	chr6:12573155-12573345@@EDN1_3==wt
chr6	12573175	12573365	chr6:12573175-12573365@@EDN1_3==wt
chr6	12573195	12573385	chr6:12573195-12573385@@EDN1_3==wt
chr6	12573215	12573405	chr6:12573215-12573405@@EDN1_3==wt
chr6	12573235	12573425	chr6:12573235-12573425@@EDN1_3==wt
chr6	12573255	12573445	chr6:12573255-12573445@@EDN1_3==wt
chr6	12573275	12573465	chr6:12573275-12573465@@EDN1_3==wt
chr6	12573295	12573485	chr6:12573295-12573485@@EDN1_3==wt
chr6	12573315	12573505	chr6:12573315-12573505@@EDN1_3==wt
chr6	12573335	12573525	chr6:12573335-12573525@@EDN1_3==wt
chr6	12573355	12573545	chr6:12573355-12573545@@EDN1_3==wt
chr6	12573375	12573565	chr6:12573375-12573565@@EDN1_3==wt
chr6	12573395	12573585	chr6:12573395-12573585@@EDN1_3==wt
chr6	12573415	12573605	chr6:12573415-12573605@@EDN1_3==wt
chr6	12573435	12573625	chr6:12573435-12573625@@EDN1_3==wt
chr6	12573455	12573645	chr6:12573455-12573645@@EDN1_3==wt
chr6	12573475	12573665	chr6:12573475-12573665@@EDN1_3==wt
chr6	12573495	12573685	chr6:12573495-12573685@@EDN1_3==wt
chr6	12573515	12573705	chr6:12573515-12573705@@EDN1_3==wt
chr6	12573535	12573725	chr6:12573535-12573725@@EDN1_3==wt
chr6	12573555	12573745	chr6:12573555-12573745@@EDN1_3==wt
chr6	12573575	12573765	chr6:12573575-12573765@@EDN1_3==wt
chr6	12573595	12573785	chr6:12573595-12573785@@EDN1_3==wt
chr6	12573615	12573805	chr6:12573615-12573805@@EDN1_3==wt
chr6	12573635	12573825	chr6:12573635-12573825@@EDN1_3==wt
chr6	12573655	12573845	chr6:12573655-12573845@@EDN1_3==wt
chr6	12573675	12573865	chr6:12573675-12573865@@EDN1_3==wt
chr6	12573695	12573885	chr6:12573695-12573885@@EDN1_3==wt
chr6	12573715	12573905	chr6:12573715-12573905@@EDN1_3==wt
chr6	12573735	12573925	chr6:12573735-12573925@@EDN1_3==wt
chr6	12573755	12573945	chr6:12573755-12573945@@EDN1_3==wt
chr6	12573775	12573965	chr6:12573775-12573965@@EDN1_3==wt
chr6	12573795	12573985	chr6:12573795-12573985@@EDN1_3==wt
chr6	12573815	12574005	chr6:12573815-12574005@@EDN1_3==wt
chr6	12573835	12574025	chr6:12573835-12574025@@EDN1_3==wt
chr6	12573855	12574045	chr6:12573855-12574045@@EDN1_3==wt
chr6	12573875	12574065	chr6:12573875-12574065@@EDN1_3==wt
chr6	12573895	12574085	chr6:12573895-12574085@@EDN1_3==wt
chr6	12573915	12574105	chr6:12573915-12574105@@EDN1_3==wt
chr6	12573935	12574125	chr6:12573935-12574125@@EDN1_3==wt
chr6	12573955	12574145	chr6:12573955-12574145@@EDN1_3==wt
chr6	12573975	12574165	chr6:12573975-12574165@@EDN1_3==wt
chr6	12573995	12574185	chr6:12573995-12574185@@EDN1_3==wt
chr6	90121320	90121510	chr6:90121320-90121510@@RRAGD_1==wt
chr6	90121340	90121530	chr6:90121340-90121530@@RRAGD_1==wt
chr6	90121360	90121550	chr6:90121360-90121550@@RRAGD_1==wt
chr6	90121380	90121570	chr6:90121380-90121570@@RRAGD_1==wt
chr6	90121400	90121590	chr6:90121400-90121590@@RRAGD_1==wt
chr6	90121420	90121610	chr6:90121420-90121610@@RRAGD_1==wt
chr6	90121440	90121630	chr6:90121440-90121630@@RRAGD_1==wt
chr6	90121460	90121650	chr6:90121460-90121650@@RRAGD_1==wt
chr6	90121480	90121670	chr6:90121480-90121670@@RRAGD_1==wt
chr6	90121500	90121690	chr6:90121500-90121690@@RRAGD_1==wt
chr6	90121520	90121710	chr6:90121520-90121710@@RRAGD_1==wt
chr6	90121540	90121730	chr6:90121540-90121730@@RRAGD_1==wt
chr6	90121560	90121750	chr6:90121560-90121750@@RRAGD_1==wt
chr6	90121580	90121770	chr6:90121580-90121770@@RRAGD_1==wt
chr6	90121600	90121790	chr6:90121600-90121790@@RRAGD_1==wt
chr6	90121620	90121810	chr6:90121620-90121810@@RRAGD_1==wt
chr6	90121640	90121830	chr6:90121640-90121830@@RRAGD_1==wt
chr6	90121660	90121850	chr6:90121660-90121850@@RRAGD_1==wt
chr6	90121680	90121870	chr6:90121680-90121870@@RRAGD_1==wt
chr6	90121700	90121890	chr6:90121700-90121890@@RRAGD_1==wt
chr6	90121720	90121910	chr6:90121720-90121910@@RRAGD_1==wt
chr6	90121740	90121930	chr6:90121740-90121930@@RRAGD_1==wt
chr6	90121760	90121950	chr6:90121760-90121950@@RRAGD_1==wt
chr6	90121780	90121970	chr6:90121780-90121970@@RRAGD_1==wt
chr6	90121800	90121990	chr6:90121800-90121990@@RRAGD_1==wt
chr6	90121820	90122010	chr6:90121820-90122010@@RRAGD_1==wt
chr6	90121840	90122030	chr6:90121840-90122030@@RRAGD_1==wt
chr6	90121860	90122050	chr6:90121860-90122050@@RRAGD_1==wt
chr6	90121880	90122070	chr6:90121880-90122070@@RRAGD_1==wt
chr6	90121900	90122090	chr6:90121900-90122090@@RRAGD_1==wt
chr6	90121920	90122110	chr6:90121920-90122110@@RRAGD_1==wt
chr6	90121940	90122130	chr6:90121940-90122130@@RRAGD_1==wt
chr6	90121960	90122150	chr6:90121960-90122150@@RRAGD_1==wt
chr6	90121980	90122170	chr6:90121980-90122170@@RRAGD_1==wt
chr6	90122000	90122190	chr6:90122000-90122190@@RRAGD_1==wt
chr6	90122020	90122210	chr6:90122020-90122210@@RRAGD_1==wt
chr6	90122040	90122230	chr6:90122040-90122230@@RRAGD_1==wt
chr6	90122060	90122250	chr6:90122060-90122250@@RRAGD_1==wt
chr6	90122080	90122270	chr6:90122080-90122270@@RRAGD_1==wt
chr6	90122100	90122290	chr6:90122100-90122290@@RRAGD_1==wt
chr6	90122120	90122310	chr6:90122120-90122310@@RRAGD_1==wt
chr6	90122140	90122330	chr6:90122140-90122330@@RRAGD_1==wt
chr6	90122160	90122350	chr6:90122160-90122350@@RRAGD_1==wt
chr6	90122180	90122370	chr6:90122180-90122370@@RRAGD_1==wt
chr6	90122200	90122390	chr6:90122200-90122390@@RRAGD_1==wt
chr6	90122220	90122410	chr6:90122220-90122410@@RRAGD_1==wt
chr6	90122240	90122430	chr6:90122240-90122430@@RRAGD_1==wt
chr6	90122260	90122450	chr6:90122260-90122450@@RRAGD_1==wt
chr6	90122280	90122470	chr6:90122280-90122470@@RRAGD_1==wt
chr6	90122300	90122490	chr6:90122300-90122490@@RRAGD_1==wt
chr6	90122320	90122510	chr6:90122320-90122510@@RRAGD_1==wt
chr6	90122340	90122530	chr6:90122340-90122530@@RRAGD_1==wt
chr6	90122360	90122550	chr6:90122360-90122550@@RRAGD_1==wt
chr6	90122380	90122570	chr6:90122380-90122570@@RRAGD_1==wt
chr6	90122400	90122590	chr6:90122400-90122590@@RRAGD_1==wt
chr6	90122420	90122610	chr6:90122420-90122610@@RRAGD_1==wt
chr6	90122440	90122630	chr6:90122440-90122630@@RRAGD_1==wt
chr6	90122460	90122650	chr6:90122460-90122650@@RRAGD_1==wt
chr6	90122480	90122670	chr6:90122480-90122670@@RRAGD_1==wt
chr6	90122500	90122690	chr6:90122500-90122690@@RRAGD_1==wt
chr6	90122520	90122710	chr6:90122520-90122710@@RRAGD_1==wt
chr6	90122540	90122730	chr6:90122540-90122730@@RRAGD_1==wt
chr6	90122560	90122750	chr6:90122560-90122750@@RRAGD_1==wt
chr6	90122580	90122770	chr6:90122580-90122770@@RRAGD_1==wt
chr6	90122600	90122790	chr6:90122600-90122790@@RRAGD_1==wt
chr6	90122620	90122810	chr6:90122620-90122810@@RRAGD_1==wt
chr6	90122640	90122830	chr6:90122640-90122830@@RRAGD_1==wt
chr6	90122660	90122850	chr6:90122660-90122850@@RRAGD_1==wt
chr6	90122680	90122870	chr6:90122680-90122870@@RRAGD_1==wt
chr6	90122700	90122890	chr6:90122700-90122890@@RRAGD_1==wt
chr6	90122720	90122910	chr6:90122720-90122910@@RRAGD_1==wt
chr6	90122740	90122930	chr6:90122740-90122930@@RRAGD_1==wt
chr6	90122760	90122950	chr6:90122760-90122950@@RRAGD_1==wt
chr6	90122780	90122970	chr6:90122780-90122970@@RRAGD_1==wt
chr6	90122800	90122990	chr6:90122800-90122990@@RRAGD_1==wt
chr6	90122820	90123010	chr6:90122820-90123010@@RRAGD_1==wt
chr6	90122840	90123030	chr6:90122840-90123030@@RRAGD_1==wt
chr6	90122860	90123050	chr6:90122860-90123050@@RRAGD_1==wt
chr6	90122880	90123070	chr6:90122880-90123070@@RRAGD_1==wt
chr6	90122900	90123090	chr6:90122900-90123090@@RRAGD_1==wt
chr6	90122920	90123110	chr6:90122920-90123110@@RRAGD_1==wt
chr6	90122940	90123130	chr6:90122940-90123130@@RRAGD_1==wt
chr6	90122960	90123150	chr6:90122960-90123150@@RRAGD_1==wt
chr6	90122980	90123170	chr6:90122980-90123170@@RRAGD_1==wt
chr6	90123000	90123190	chr6:90123000-90123190@@RRAGD_1==wt
chr6	90123020	90123210	chr6:90123020-90123210@@RRAGD_1==wt
chr6	90123040	90123230	chr6:90123040-90123230@@RRAGD_1==wt
chr6	90123060	90123250	chr6:90123060-90123250@@RRAGD_1==wt
chr6	90123080	90123270	chr6:90123080-90123270@@RRAGD_1==wt
chr6	90123100	90123290	chr6:90123100-90123290@@RRAGD_1==wt
chr6	90123120	90123310	chr6:90123120-90123310@@RRAGD_1==wt
chr7	93930341	93930531	chr7:93930341-93930531@@COL1A2_1==wt
chr7	93930361	93930551	chr7:93930361-93930551@@COL1A2_1==wt
chr7	93930381	93930571	chr7:93930381-93930571@@COL1A2_1==wt
chr7	93930401	93930591	chr7:93930401-93930591@@COL1A2_1==wt
chr7	93930421	93930611	chr7:93930421-93930611@@COL1A2_1==wt
chr7	93930441	93930631	chr7:93930441-93930631@@COL1A2_1==wt
chr7	93930461	93930651	chr7:93930461-93930651@@COL1A2_1==wt
chr7	93930481	93930671	chr7:93930481-93930671@@COL1A2_1==wt
chr7	93930501	93930691	chr7:93930501-93930691@@COL1A2_1==wt
chr7	93930521	93930711	chr7:93930521-93930711@@COL1A2_1==wt
chr7	93930541	93930731	chr7:93930541-93930731@@COL1A2_1==wt
chr7	93930561	93930751	chr7:93930561-93930751@@COL1A2_1==wt
chr7	93930581	93930771	chr7:93930581-93930771@@COL1A2_1==wt
chr7	93930601	93930791	chr7:93930601-93930791@@COL1A2_1==wt
chr7	93930621	93930811	chr7:93930621-93930811@@COL1A2_1==wt
chr7	93930641	93930831	chr7:93930641-93930831@@COL1A2_1==wt
chr7	93930661	93930851	chr7:93930661-93930851@@COL1A2_1==wt
chr7	93930681	93930871	chr7:93930681-93930871@@COL1A2_1==wt
chr7	93930701	93930891	chr7:93930701-93930891@@COL1A2_1==wt
chr7	93930721	93930911	chr7:93930721-93930911@@COL1A2_1==wt
chr7	93930741	93930931	chr7:93930741-93930931@@COL1A2_1==wt
chr7	93930761	93930951	chr7:93930761-93930951@@COL1A2_1==wt
chr7	93930781	93930971	chr7:93930781-93930971@@COL1A2_1==wt
chr7	93930801	93930991	chr7:93930801-93930991@@COL1A2_1==wt
chr7	93930821	93931011	chr7:93930821-93931011@@COL1A2_1==wt
chr7	93930841	93931031	chr7:93930841-93931031@@COL1A2_1==wt
chr7	93930861	93931051	chr7:93930861-93931051@@COL1A2_1==wt
chr7	93930881	93931071	chr7:93930881-93931071@@COL1A2_1==wt
chr7	93930901	93931091	chr7:93930901-93931091@@COL1A2_1==wt
chr7	93930921	93931111	chr7:93930921-93931111@@COL1A2_1==wt
chr7	93930941	93931131	chr7:93930941-93931131@@COL1A2_1==wt
chr7	93930961	93931151	chr7:93930961-93931151@@COL1A2_1==wt
chr7	93930981	93931171	chr7:93930981-93931171@@COL1A2_1==wt
chr7	93931001	93931191	chr7:93931001-93931191@@COL1A2_1==wt
chr7	93931021	93931211	chr7:93931021-93931211@@COL1A2_1==wt
chr7	93931041	93931231	chr7:93931041-93931231@@COL1A2_1==wt
chr7	93931061	93931251	chr7:93931061-93931251@@COL1A2_1==wt
chr7	93931081	93931271	chr7:93931081-93931271@@COL1A2_1==wt
chr7	93931101	93931291	chr7:93931101-93931291@@COL1A2_1==wt
chr7	93931121	93931311	chr7:93931121-93931311@@COL1A2_1==wt
chr7	93931141	93931331	chr7:93931141-93931331@@COL1A2_1==wt
chr7	93931161	93931351	chr7:93931161-93931351@@COL1A2_1==wt
chr7	93931181	93931371	chr7:93931181-93931371@@COL1A2_1==wt
chr7	93931201	93931391	chr7:93931201-93931391@@COL1A2_1==wt
chr7	93931221	93931411	chr7:93931221-93931411@@COL1A2_1==wt
chr7	93931241	93931431	chr7:93931241-93931431@@COL1A2_1==wt
chr7	93931261	93931451	chr7:93931261-93931451@@COL1A2_1==wt
chr7	93931281	93931471	chr7:93931281-93931471@@COL1A2_1==wt
chr7	93931301	93931491	chr7:93931301-93931491@@COL1A2_1==wt
chr7	93931321	93931511	chr7:93931321-93931511@@COL1A2_1==wt
chr7	93931341	93931531	chr7:93931341-93931531@@COL1A2_1==wt
chr7	93931361	93931551	chr7:93931361-93931551@@COL1A2_1==wt
chr7	93931381	93931571	chr7:93931381-93931571@@COL1A2_1==wt
chr7	93931401	93931591	chr7:93931401-93931591@@COL1A2_1==wt
chr7	93931421	93931611	chr7:93931421-93931611@@COL1A2_1==wt
chr7	100659924	100660114	chr7:100659924-100660114@@SERPINE1_1==wt
chr7	100659944	100660134	chr7:100659944-100660134@@SERPINE1_1==wt
chr7	100659964	100660154	chr7:100659964-100660154@@SERPINE1_1==wt
chr7	100659984	100660174	chr7:100659984-100660174@@SERPINE1_1==wt
chr7	100660004	100660194	chr7:100660004-100660194@@SERPINE1_1==wt
chr7	100660024	100660214	chr7:100660024-100660214@@SERPINE1_1==wt
chr7	100660044	100660234	chr7:100660044-100660234@@SERPINE1_1==wt
chr7	100660064	100660254	chr7:100660064-100660254@@SERPINE1_1==wt
chr7	100660084	100660274	chr7:100660084-100660274@@SERPINE1_1==wt
chr7	100660104	100660294	chr7:100660104-100660294@@SERPINE1_1==wt
chr7	100660124	100660314	chr7:100660124-100660314@@SERPINE1_1==wt
chr7	100660144	100660334	chr7:100660144-100660334@@SERPINE1_1==wt
chr7	100660164	100660354	chr7:100660164-100660354@@SERPINE1_1==wt
chr7	100660184	100660374	chr7:100660184-100660374@@SERPINE1_1==wt
chr7	100660204	100660394	chr7:100660204-100660394@@SERPINE1_1==wt
chr7	100660224	100660414	chr7:100660224-100660414@@SERPINE1_1==wt
chr7	100660244	100660434	chr7:100660244-100660434@@SERPINE1_1==wt
chr7	100660264	100660454	chr7:100660264-100660454@@SERPINE1_1==wt
chr7	100660284	100660474	chr7:100660284-100660474@@SERPINE1_1==wt
chr7	100660304	100660494	chr7:100660304-100660494@@SERPINE1_1==wt
chr7	100660324	100660514	chr7:100660324-100660514@@SERPINE1_1==wt
chr7	100660344	100660534	chr7:100660344-100660534@@SERPINE1_1==wt
chr7	100660364	100660554	chr7:100660364-100660554@@SERPINE1_1==wt
chr7	100660384	100660574	chr7:100660384-100660574@@SERPINE1_1==wt
chr7	100660404	100660594	chr7:100660404-100660594@@SERPINE1_1==wt
chr7	100660424	100660614	chr7:100660424-100660614@@SERPINE1_1==wt
chr7	100660444	100660634	chr7:100660444-100660634@@SERPINE1_1==wt
chr7	100660464	100660654	chr7:100660464-100660654@@SERPINE1_1==wt
chr7	100660484	100660674	chr7:100660484-100660674@@SERPINE1_1==wt
chr7	100660504	100660694	chr7:100660504-100660694@@SERPINE1_1==wt
chr7	100660524	100660714	chr7:100660524-100660714@@SERPINE1_1==wt
chr7	100660544	100660734	chr7:100660544-100660734@@SERPINE1_1==wt
chr7	100660564	100660754	chr7:100660564-100660754@@SERPINE1_1==wt
chr7	100660584	100660774	chr7:100660584-100660774@@SERPINE1_1==wt
chr7	100660604	100660794	chr7:100660604-100660794@@SERPINE1_1==wt
chr7	100660624	100660814	chr7:100660624-100660814@@SERPINE1_1==wt
chr7	100660644	100660834	chr7:100660644-100660834@@SERPINE1_1==wt
chr7	100660664	100660854	chr7:100660664-100660854@@SERPINE1_1==wt
chr7	100660684	100660874	chr7:100660684-100660874@@SERPINE1_1==wt
chr7	100660704	100660894	chr7:100660704-100660894@@SERPINE1_1==wt
chr7	100660724	100660914	chr7:100660724-100660914@@SERPINE1_1==wt
chr7	100660744	100660934	chr7:100660744-100660934@@SERPINE1_1==wt
chr7	100660764	100660954	chr7:100660764-100660954@@SERPINE1_1==wt
chr7	100660784	100660974	chr7:100660784-100660974@@SERPINE1_1==wt
chr7	100660804	100660994	chr7:100660804-100660994@@SERPINE1_1==wt
chr7	100660824	100661014	chr7:100660824-100661014@@SERPINE1_1==wt
chr7	100660844	100661034	chr7:100660844-100661034@@SERPINE1_1==wt
chr7	100660864	100661054	chr7:100660864-100661054@@SERPINE1_1==wt
chr7	100660884	100661074	chr7:100660884-100661074@@SERPINE1_1==wt
chr7	100660904	100661094	chr7:100660904-100661094@@SERPINE1_1==wt
chr7	100660924	100661114	chr7:100660924-100661114@@SERPINE1_1==wt
chr7	100660944	100661134	chr7:100660944-100661134@@SERPINE1_1==wt
chr7	100660964	100661154	chr7:100660964-100661154@@SERPINE1_1==wt
chr7	100660984	100661174	chr7:100660984-100661174@@SERPINE1_1==wt
chr7	100661004	100661194	chr7:100661004-100661194@@SERPINE1_1==wt
chr7	100661024	100661214	chr7:100661024-100661214@@SERPINE1_1==wt
chr7	100661044	100661234	chr7:100661044-100661234@@SERPINE1_1==wt
chr7	100661064	100661254	chr7:100661064-100661254@@SERPINE1_1==wt
chr7	100661084	100661274	chr7:100661084-100661274@@SERPINE1_1==wt
chr7	100661104	100661294	chr7:100661104-100661294@@SERPINE1_1==wt
chr7	100661124	100661314	chr7:100661124-100661314@@SERPINE1_1==wt
chr7	100661144	100661334	chr7:100661144-100661334@@SERPINE1_1==wt
chr7	100661164	100661354	chr7:100661164-100661354@@SERPINE1_1==wt
chr7	100661184	100661374	chr7:100661184-100661374@@SERPINE1_1==wt
chr7	100661204	100661394	chr7:100661204-100661394@@SERPINE1_1==wt
chr7	100741959	100742149	chr7:100741959-100742149@@SERPINE1_2==wt
chr7	100741979	100742169	chr7:100741979-100742169@@SERPINE1_2==wt
chr7	100741999	100742189	chr7:100741999-100742189@@SERPINE1_2==wt
chr7	100742019	100742209	chr7:100742019-100742209@@SERPINE1_2==wt
chr7	100742039	100742229	chr7:100742039-100742229@@SERPINE1_2==wt
chr7	100742059	100742249	chr7:100742059-100742249@@SERPINE1_2==wt
chr7	100742079	100742269	chr7:100742079-100742269@@SERPINE1_2==wt
chr7	100742099	100742289	chr7:100742099-100742289@@SERPINE1_2==wt
chr7	100742119	100742309	chr7:100742119-100742309@@SERPINE1_2==wt
chr7	100742139	100742329	chr7:100742139-100742329@@SERPINE1_2==wt
chr7	100742159	100742349	chr7:100742159-100742349@@SERPINE1_2==wt
chr7	100742179	100742369	chr7:100742179-100742369@@SERPINE1_2==wt
chr7	100742199	100742389	chr7:100742199-100742389@@SERPINE1_2==wt
chr7	100742219	100742409	chr7:100742219-100742409@@SERPINE1_2==wt
chr7	100742239	100742429	chr7:100742239-100742429@@SERPINE1_2==wt
chr7	100742259	100742449	chr7:100742259-100742449@@SERPINE1_2==wt
chr7	100742279	100742469	chr7:100742279-100742469@@SERPINE1_2==wt
chr7	100742299	100742489	chr7:100742299-100742489@@SERPINE1_2==wt
chr7	100742319	100742509	chr7:100742319-100742509@@SERPINE1_2==wt
chr7	100742339	100742529	chr7:100742339-100742529@@SERPINE1_2==wt
chr7	100742359	100742549	chr7:100742359-100742549@@SERPINE1_2==wt
chr7	100742379	100742569	chr7:100742379-100742569@@SERPINE1_2==wt
chr7	100742399	100742589	chr7:100742399-100742589@@SERPINE1_2==wt
chr7	100742419	100742609	chr7:100742419-100742609@@SERPINE1_2==wt
chr7	100742439	100742629	chr7:100742439-100742629@@SERPINE1_2==wt
chr7	100742459	100742649	chr7:100742459-100742649@@SERPINE1_2==wt
chr7	100742479	100742669	chr7:100742479-100742669@@SERPINE1_2==wt
chr7	100742499	100742689	chr7:100742499-100742689@@SERPINE1_2==wt
chr7	100742519	100742709	chr7:100742519-100742709@@SERPINE1_2==wt
chr7	100742539	100742729	chr7:100742539-100742729@@SERPINE1_2==wt
chr7	100742559	100742749	chr7:100742559-100742749@@SERPINE1_2==wt
chr7	100742579	100742769	chr7:100742579-100742769@@SERPINE1_2==wt
chr7	100742599	100742789	chr7:100742599-100742789@@SERPINE1_2==wt
chr7	100742619	100742809	chr7:100742619-100742809@@SERPINE1_2==wt
chr7	100742639	100742829	chr7:100742639-100742829@@SERPINE1_2==wt
chr7	100742659	100742849	chr7:100742659-100742849@@SERPINE1_2==wt
chr7	100742679	100742869	chr7:100742679-100742869@@SERPINE1_2==wt
chr7	100742699	100742889	chr7:100742699-100742889@@SERPINE1_2==wt
chr7	100742719	100742909	chr7:100742719-100742909@@SERPINE1_2==wt
chr7	100742739	100742929	chr7:100742739-100742929@@SERPINE1_2==wt
chr7	100742759	100742949	chr7:100742759-100742949@@SERPINE1_2==wt
chr7	100742779	100742969	chr7:100742779-100742969@@SERPINE1_2==wt
chr7	100742799	100742989	chr7:100742799-100742989@@SERPINE1_2==wt
chr7	100742819	100743009	chr7:100742819-100743009@@SERPINE1_2==wt
chr7	100742839	100743029	chr7:100742839-100743029@@SERPINE1_2==wt
chr7	100742859	100743049	chr7:100742859-100743049@@SERPINE1_2==wt
chr7	100742879	100743069	chr7:100742879-100743069@@SERPINE1_2==wt
chr7	100742899	100743089	chr7:100742899-100743089@@SERPINE1_2==wt
chr7	100742919	100743109	chr7:100742919-100743109@@SERPINE1_2==wt
chr7	100742939	100743129	chr7:100742939-100743129@@SERPINE1_2==wt
chr7	100742959	100743149	chr7:100742959-100743149@@SERPINE1_2==wt
chr7	100742979	100743169	chr7:100742979-100743169@@SERPINE1_2==wt
chr7	100742999	100743189	chr7:100742999-100743189@@SERPINE1_2==wt
chr7	100743019	100743209	chr7:100743019-100743209@@SERPINE1_2==wt
chr7	100743039	100743229	chr7:100743039-100743229@@SERPINE1_2==wt
chr7	100743059	100743249	chr7:100743059-100743249@@SERPINE1_2==wt
chr7	100743079	100743269	chr7:100743079-100743269@@SERPINE1_2==wt
chr7	100743099	100743289	chr7:100743099-100743289@@SERPINE1_2==wt
chr7	100743119	100743309	chr7:100743119-100743309@@SERPINE1_2==wt
chr7	100743139	100743329	chr7:100743139-100743329@@SERPINE1_2==wt
chr7	100743159	100743349	chr7:100743159-100743349@@SERPINE1_2==wt
chr7	100743179	100743369	chr7:100743179-100743369@@SERPINE1_2==wt
chr7	100743199	100743389	chr7:100743199-100743389@@SERPINE1_2==wt
chr7	100743219	100743409	chr7:100743219-100743409@@SERPINE1_2==wt
chr7	100743239	100743429	chr7:100743239-100743429@@SERPINE1_2==wt
chr7	100743259	100743449	chr7:100743259-100743449@@SERPINE1_2==wt
chr7	100743279	100743469	chr7:100743279-100743469@@SERPINE1_2==wt
chr7	100743299	100743489	chr7:100743299-100743489@@SERPINE1_2==wt
chr7	100743319	100743509	chr7:100743319-100743509@@SERPINE1_2==wt
chr7	100743339	100743529	chr7:100743339-100743529@@SERPINE1_2==wt
chr7	100743359	100743549	chr7:100743359-100743549@@SERPINE1_2==wt
chr7	100743379	100743569	chr7:100743379-100743569@@SERPINE1_2==wt
chr7	100743399	100743589	chr7:100743399-100743589@@SERPINE1_2==wt
chr7	100743419	100743609	chr7:100743419-100743609@@SERPINE1_2==wt
chr7	100743439	100743629	chr7:100743439-100743629@@SERPINE1_2==wt
chr7	100743459	100743649	chr7:100743459-100743649@@SERPINE1_2==wt
chr7	100743479	100743669	chr7:100743479-100743669@@SERPINE1_2==wt
chr7	100743499	100743689	chr7:100743499-100743689@@SERPINE1_2==wt
chr7	100743519	100743709	chr7:100743519-100743709@@SERPINE1_2==wt
chr7	100743539	100743729	chr7:100743539-100743729@@SERPINE1_2==wt
chr7	100743559	100743749	chr7:100743559-100743749@@SERPINE1_2==wt
chr7	100743579	100743769	chr7:100743579-100743769@@SERPINE1_2==wt
chr7	100764536	100764726	chr7:100764536-100764726@@SERPINE1_6==wt
chr7	100764556	100764746	chr7:100764556-100764746@@SERPINE1_6==wt
chr7	100764576	100764766	chr7:100764576-100764766@@SERPINE1_6==wt
chr7	100764596	100764786	chr7:100764596-100764786@@SERPINE1_6==wt
chr7	100764616	100764806	chr7:100764616-100764806@@SERPINE1_6==wt
chr7	100764636	100764826	chr7:100764636-100764826@@SERPINE1_6==wt
chr7	100764656	100764846	chr7:100764656-100764846@@SERPINE1_6==wt
chr7	100764676	100764866	chr7:100764676-100764866@@SERPINE1_6==wt
chr7	100764696	100764886	chr7:100764696-100764886@@SERPINE1_6==wt
chr7	100764716	100764906	chr7:100764716-100764906@@SERPINE1_6==wt
chr7	100764736	100764926	chr7:100764736-100764926@@SERPINE1_6==wt
chr7	100764756	100764946	chr7:100764756-100764946@@SERPINE1_6==wt
chr7	100764776	100764966	chr7:100764776-100764966@@SERPINE1_6==wt
chr7	100764796	100764986	chr7:100764796-100764986@@SERPINE1_6==wt
chr7	100764816	100765006	chr7:100764816-100765006@@SERPINE1_6==wt
chr7	100764836	100765026	chr7:100764836-100765026@@SERPINE1_6==wt
chr7	100764856	100765046	chr7:100764856-100765046@@SERPINE1_6==wt
chr7	100764876	100765066	chr7:100764876-100765066@@SERPINE1_6==wt
chr7	100764896	100765086	chr7:100764896-100765086@@SERPINE1_6==wt
chr7	100764916	100765106	chr7:100764916-100765106@@SERPINE1_6==wt
chr7	100764936	100765126	chr7:100764936-100765126@@SERPINE1_6==wt
chr7	100764956	100765146	chr7:100764956-100765146@@SERPINE1_6==wt
chr7	100764976	100765166	chr7:100764976-100765166@@SERPINE1_6==wt
chr7	100764996	100765186	chr7:100764996-100765186@@SERPINE1_6==wt
chr7	100765016	100765206	chr7:100765016-100765206@@SERPINE1_6==wt
chr7	100765036	100765226	chr7:100765036-100765226@@SERPINE1_6==wt
chr7	100765056	100765246	chr7:100765056-100765246@@SERPINE1_6==wt
chr7	100765076	100765266	chr7:100765076-100765266@@SERPINE1_6==wt
chr7	100765096	100765286	chr7:100765096-100765286@@SERPINE1_6==wt
chr7	100765116	100765306	chr7:100765116-100765306@@SERPINE1_6==wt
chr7	100765136	100765326	chr7:100765136-100765326@@SERPINE1_6==wt
chr7	100765156	100765346	chr7:100765156-100765346@@SERPINE1_6==wt
chr7	100765176	100765366	chr7:100765176-100765366@@SERPINE1_6==wt
chr7	100765196	100765386	chr7:100765196-100765386@@SERPINE1_6==mut_cisbp_M5907_chr7
chr7	100765216	100765406	chr7:100765216-100765406@@SERPINE1_6==mut_cisbp_M5907_chr7
chr7	100765236	100765426	chr7:100765236-100765426@@SERPINE1_6==mut_cisbp_M5907_chr7
chr7	100765256	100765446	chr7:100765256-100765446@@SERPINE1_6==mut_cisbp_M5907_chr7
chr7	100765276	100765466	chr7:100765276-100765466@@SERPINE1_6==mut_cisbp_M5907_chr7
chr7	100765296	100765486	chr7:100765296-100765486@@SERPINE1_6==mut_cisbp_M5907_chr7
chr7	100765316	100765506	chr7:100765316-100765506@@SERPINE1_6==mut_cisbp_M5907_chr7
chr7	100765336	100765526	chr7:100765336-100765526@@SERPINE1_6==mut_cisbp_M5907_chr7
chr7	100765356	100765546	chr7:100765356-100765546@@SERPINE1_6==mut_cisbp_M5907_chr7
chr7	100765376	100765566	chr7:100765376-100765566@@SERPINE1_6==wt
chr7	100765396	100765586	chr7:100765396-100765586@@SERPINE1_6==wt
chr7	100765416	100765606	chr7:100765416-100765606@@SERPINE1_6==wt
chr7	100765436	100765626	chr7:100765436-100765626@@SERPINE1_6==wt
chr7	100765456	100765646	chr7:100765456-100765646@@SERPINE1_6==wt
chr7	100765476	100765666	chr7:100765476-100765666@@SERPINE1_6==wt
chr7	100765496	100765686	chr7:100765496-100765686@@SERPINE1_6==wt
chr7	100765516	100765706	chr7:100765516-100765706@@SERPINE1_6==wt
chr7	100765536	100765726	chr7:100765536-100765726@@SERPINE1_6==wt
chr7	100765556	100765746	chr7:100765556-100765746@@SERPINE1_6==wt
chr7	100765576	100765766	chr7:100765576-100765766@@SERPINE1_6==wt
chr7	100765596	100765786	chr7:100765596-100765786@@SERPINE1_6==wt
chr7	100765616	100765806	chr7:100765616-100765806@@SERPINE1_6==wt
chr7	100765636	100765826	chr7:100765636-100765826@@SERPINE1_6==wt
chr7	100765656	100765846	chr7:100765656-100765846@@SERPINE1_6==wt
chr7	100765676	100765866	chr7:100765676-100765866@@SERPINE1_6==wt
chr7	100765696	100765886	chr7:100765696-100765886@@SERPINE1_6==wt
chr7	100765716	100765906	chr7:100765716-100765906@@SERPINE1_6==wt
chr7	100765736	100765926	chr7:100765736-100765926@@SERPINE1_6==wt
chr7	100765756	100765946	chr7:100765756-100765946@@SERPINE1_6==wt
chr7	100765776	100765966	chr7:100765776-100765966@@SERPINE1_6==wt
chr7	100765796	100765986	chr7:100765796-100765986@@SERPINE1_6==wt
chr7	100765816	100766006	chr7:100765816-100766006@@SERPINE1_6==wt
chr7	100765836	100766026	chr7:100765836-100766026@@SERPINE1_6==wt
chr7	100765856	100766046	chr7:100765856-100766046@@SERPINE1_6==wt
chr7	100765876	100766066	chr7:100765876-100766066@@SERPINE1_6==wt
chr7	100765896	100766086	chr7:100765896-100766086@@SERPINE1_6==wt
chr7	100765916	100766106	chr7:100765916-100766106@@SERPINE1_6==wt
chr7	100765936	100766126	chr7:100765936-100766126@@SERPINE1_6==wt
chr7	100765956	100766146	chr7:100765956-100766146@@SERPINE1_6==wt
chr7	100765976	100766166	chr7:100765976-100766166@@SERPINE1_6==wt
chr7	100765996	100766186	chr7:100765996-100766186@@SERPINE1_6==wt
chr7	100766016	100766206	chr7:100766016-100766206@@SERPINE1_6==wt
chr7	100766036	100766226	chr7:100766036-100766226@@SERPINE1_6==wt
chr7	100766056	100766246	chr7:100766056-100766246@@SERPINE1_6==wt
chr7	100766076	100766266	chr7:100766076-100766266@@SERPINE1_6==wt
chr7	100766096	100766286	chr7:100766096-100766286@@SERPINE1_6==wt
chr7	100766116	100766306	chr7:100766116-100766306@@SERPINE1_6==wt
chr7	100766136	100766326	chr7:100766136-100766326@@SERPINE1_6==wt
chr7	100766156	100766346	chr7:100766156-100766346@@SERPINE1_6==wt
chr7	128466910	128467100	chr7:128466910-128467100@@FLNC_1==wt
chr7	128466930	128467120	chr7:128466930-128467120@@FLNC_1==wt
chr7	128466950	128467140	chr7:128466950-128467140@@FLNC_1==mut_cisbp_M5907_chr7
chr7	128466970	128467160	chr7:128466970-128467160@@FLNC_1==mut_cisbp_M5907_chr7
chr7	128466990	128467180	chr7:128466990-128467180@@FLNC_1==mut_cisbp_M5907_chr7
chr7	128467010	128467200	chr7:128467010-128467200@@FLNC_1==mut_cisbp_M5907_chr7
chr7	128467030	128467220	chr7:128467030-128467220@@FLNC_1==mut_cisbp_M5907_chr7
chr7	128467050	128467240	chr7:128467050-128467240@@FLNC_1==mut_cisbp_M5907_chr7
chr7	128467070	128467260	chr7:128467070-128467260@@FLNC_1==mut_cisbp_M5907_chr7
chr7	128467090	128467280	chr7:128467090-128467280@@FLNC_1==mut_cisbp_M5907_chr7
chr7	128467110	128467300	chr7:128467110-128467300@@FLNC_1==mut_cisbp_M5907_chr7
chr7	128467130	128467320	chr7:128467130-128467320@@FLNC_1==mut_cisbp_M5907_chr7
chr7	128467150	128467340	chr7:128467150-128467340@@FLNC_1==wt
chr7	128467170	128467360	chr7:128467170-128467360@@FLNC_1==wt
chr7	128467190	128467380	chr7:128467190-128467380@@FLNC_1==wt
chr7	128467210	128467400	chr7:128467210-128467400@@FLNC_1==wt
chr7	128467230	128467420	chr7:128467230-128467420@@FLNC_1==wt
chr7	128467250	128467440	chr7:128467250-128467440@@FLNC_1==wt
chr7	128467270	128467460	chr7:128467270-128467460@@FLNC_1==wt
chr7	128467290	128467480	chr7:128467290-128467480@@FLNC_1==wt
chr7	128467310	128467500	chr7:128467310-128467500@@FLNC_1==wt
chr7	128467330	128467520	chr7:128467330-128467520@@FLNC_1==wt
chr7	128467350	128467540	chr7:128467350-128467540@@FLNC_1==wt
chr7	128467370	128467560	chr7:128467370-128467560@@FLNC_1==wt
chr7	128467390	128467580	chr7:128467390-128467580@@FLNC_1==wt
chr7	128467410	128467600	chr7:128467410-128467600@@FLNC_1==wt
chr7	128467430	128467620	chr7:128467430-128467620@@FLNC_1==wt
chr7	128467450	128467640	chr7:128467450-128467640@@FLNC_1==wt
chr7	128467470	128467660	chr7:128467470-128467660@@FLNC_1==wt
chr7	128467490	128467680	chr7:128467490-128467680@@FLNC_1==wt
chr7	128467510	128467700	chr7:128467510-128467700@@FLNC_1==wt
chr7	128467530	128467720	chr7:128467530-128467720@@FLNC_1==wt
chr7	128467550	128467740	chr7:128467550-128467740@@FLNC_1==wt
chr7	128467570	128467760	chr7:128467570-128467760@@FLNC_1==wt
chr7	128467590	128467780	chr7:128467590-128467780@@FLNC_1==wt
chr7	128467610	128467800	chr7:128467610-128467800@@FLNC_1==wt
chr7	128467630	128467820	chr7:128467630-128467820@@FLNC_1==wt
chr7	128467650	128467840	chr7:128467650-128467840@@FLNC_1==wt
chr7	128467670	128467860	chr7:128467670-128467860@@FLNC_1==wt
chr7	128467690	128467880	chr7:128467690-128467880@@FLNC_1==wt
chr7	128467710	128467900	chr7:128467710-128467900@@FLNC_1==wt
chr7	128467730	128467920	chr7:128467730-128467920@@FLNC_1==wt
chr7	128467750	128467940	chr7:128467750-128467940@@FLNC_1==wt
chr7	128467770	128467960	chr7:128467770-128467960@@FLNC_1==wt
chr7	128467790	128467980	chr7:128467790-128467980@@FLNC_1==wt
chr7	128467810	128468000	chr7:128467810-128468000@@FLNC_1==wt
chr7	128467830	128468020	chr7:128467830-128468020@@FLNC_1==wt
chr7	128467850	128468040	chr7:128467850-128468040@@FLNC_1==wt
chr7	128467870	128468060	chr7:128467870-128468060@@FLNC_1==wt
chr7	128467890	128468080	chr7:128467890-128468080@@FLNC_1==wt
chr7	128467910	128468100	chr7:128467910-128468100@@FLNC_1==wt
chr7	128467930	128468120	chr7:128467930-128468120@@FLNC_1==wt
chr7	128467950	128468140	chr7:128467950-128468140@@FLNC_1==wt
chr7	128467970	128468160	chr7:128467970-128468160@@FLNC_1==wt
chr7	128467990	128468180	chr7:128467990-128468180@@FLNC_1==wt
chr7	128468010	128468200	chr7:128468010-128468200@@FLNC_1==wt
chr7	128468030	128468220	chr7:128468030-128468220@@FLNC_1==wt
chr7	128468050	128468240	chr7:128468050-128468240@@FLNC_1==wt
chr7	128468070	128468260	chr7:128468070-128468260@@FLNC_1==wt
chr7	128468090	128468280	chr7:128468090-128468280@@FLNC_1==wt
chr7	128468110	128468300	chr7:128468110-128468300@@FLNC_1==wt
chr7	128468130	128468320	chr7:128468130-128468320@@FLNC_1==wt
chr7	128468150	128468340	chr7:128468150-128468340@@FLNC_1==wt
chr7	128468170	128468360	chr7:128468170-128468360@@FLNC_1==wt
chr7	128468190	128468380	chr7:128468190-128468380@@FLNC_1==wt
chr7	128468210	128468400	chr7:128468210-128468400@@FLNC_1==wt
chr7	128468230	128468420	chr7:128468230-128468420@@FLNC_1==wt
chr7	128468250	128468440	chr7:128468250-128468440@@FLNC_1==wt
chr7	128468270	128468460	chr7:128468270-128468460@@FLNC_1==wt
chr7	128468290	128468480	chr7:128468290-128468480@@FLNC_1==wt
chr7	128468310	128468500	chr7:128468310-128468500@@FLNC_1==wt
chr7	128468330	128468520	chr7:128468330-128468520@@FLNC_1==wt
chr7	128468350	128468540	chr7:128468350-128468540@@FLNC_1==wt
chr7	128468370	128468560	chr7:128468370-128468560@@FLNC_1==wt
chr7	128468390	128468580	chr7:128468390-128468580@@FLNC_1==wt
chr7	128468410	128468600	chr7:128468410-128468600@@FLNC_1==wt
chr7	128468430	128468620	chr7:128468430-128468620@@FLNC_1==wt
chr7	128468450	128468640	chr7:128468450-128468640@@FLNC_1==wt
chr7	128468470	128468660	chr7:128468470-128468660@@FLNC_1==wt
chr7	128468490	128468680	chr7:128468490-128468680@@FLNC_1==wt
chr7	128468510	128468700	chr7:128468510-128468700@@FLNC_1==wt
chr7	128468530	128468720	chr7:128468530-128468720@@FLNC_1==wt
chr7	128468550	128468740	chr7:128468550-128468740@@FLNC_1==wt
chr7	128468570	128468760	chr7:128468570-128468760@@FLNC_1==wt
chr7	128468590	128468780	chr7:128468590-128468780@@FLNC_1==wt
chr7	128468610	128468800	chr7:128468610-128468800@@FLNC_1==wt
chr7	128468630	128468820	chr7:128468630-128468820@@FLNC_1==wt
chr7	128468650	128468840	chr7:128468650-128468840@@FLNC_1==wt
chr7	128468670	128468860	chr7:128468670-128468860@@FLNC_1==wt
chr7	128468690	128468880	chr7:128468690-128468880@@FLNC_1==wt
chr7	128468710	128468900	chr7:128468710-128468900@@FLNC_1==wt
chr7	128468730	128468920	chr7:128468730-128468920@@FLNC_1==wt
chr7	128468750	128468940	chr7:128468750-128468940@@FLNC_1==wt
chr7	128468770	128468960	chr7:128468770-128468960@@FLNC_1==wt
chr7	128470187	128470377	chr7:128470187-128470377@@FLNC_3==mut_cisbp_M5907_chr7
chr7	128470207	128470397	chr7:128470207-128470397@@FLNC_3==mut_cisbp_M5907_chr7
chr7	128470227	128470417	chr7:128470227-128470417@@FLNC_3==mut_cisbp_M5907_chr7
chr7	128470247	128470437	chr7:128470247-128470437@@FLNC_3==mut_cisbp_M5907_chr7
chr7	128470267	128470457	chr7:128470267-128470457@@FLNC_3==mut_cisbp_M5907_chr7
chr7	128470287	128470477	chr7:128470287-128470477@@FLNC_3==mut_cisbp_M5907_chr7
chr7	128470307	128470497	chr7:128470307-128470497@@FLNC_3==mut_cisbp_M5907_chr7
chr7	128470327	128470517	chr7:128470327-128470517@@FLNC_3==mut_cisbp_M5907_chr7
chr7	128470347	128470537	chr7:128470347-128470537@@FLNC_3==mut_cisbp_M5907_chr7
chr7	128470367	128470557	chr7:128470367-128470557@@FLNC_3==wt
chr7	128470387	128470577	chr7:128470387-128470577@@FLNC_3==wt
chr7	128470407	128470597	chr7:128470407-128470597@@FLNC_3==wt
chr7	128470427	128470617	chr7:128470427-128470617@@FLNC_3==wt
chr7	128470447	128470637	chr7:128470447-128470637@@FLNC_3==wt
chr7	128470467	128470657	chr7:128470467-128470657@@FLNC_3==wt
chr7	128470487	128470677	chr7:128470487-128470677@@FLNC_3==wt
chr7	128470507	128470697	chr7:128470507-128470697@@FLNC_3==wt
chr7	128470527	128470717	chr7:128470527-128470717@@FLNC_3==wt
chr7	128470547	128470737	chr7:128470547-128470737@@FLNC_3==wt
chr7	128470567	128470757	chr7:128470567-128470757@@FLNC_3==wt
chr7	128470587	128470777	chr7:128470587-128470777@@FLNC_3==wt
chr7	128470607	128470797	chr7:128470607-128470797@@FLNC_3==wt
chr7	128470627	128470817	chr7:128470627-128470817@@FLNC_3==wt
chr7	128470647	128470837	chr7:128470647-128470837@@FLNC_3==wt
chr7	128470667	128470857	chr7:128470667-128470857@@FLNC_3==wt
chr7	128470687	128470877	chr7:128470687-128470877@@FLNC_3==wt
chr7	128470707	128470897	chr7:128470707-128470897@@FLNC_3==wt
chr7	128470727	128470917	chr7:128470727-128470917@@FLNC_3==wt
chr7	128470747	128470937	chr7:128470747-128470937@@FLNC_3==wt
chr7	128470767	128470957	chr7:128470767-128470957@@FLNC_3==wt
chr7	128470787	128470977	chr7:128470787-128470977@@FLNC_3==wt
chr7	128470807	128470997	chr7:128470807-128470997@@FLNC_3==wt
chr7	128470827	128471017	chr7:128470827-128471017@@FLNC_3==wt
chr7	128470847	128471037	chr7:128470847-128471037@@FLNC_3==wt
chr7	128470867	128471057	chr7:128470867-128471057@@FLNC_3==wt
chr7	128470887	128471077	chr7:128470887-128471077@@FLNC_3==wt
chr7	128470907	128471097	chr7:128470907-128471097@@FLNC_3==wt
chr7	128470927	128471117	chr7:128470927-128471117@@FLNC_3==wt
chr7	128470947	128471137	chr7:128470947-128471137@@FLNC_3==wt
chr7	128470967	128471157	chr7:128470967-128471157@@FLNC_3==wt
chr7	128470987	128471177	chr7:128470987-128471177@@FLNC_3==wt
chr7	128471007	128471197	chr7:128471007-128471197@@FLNC_3==wt
chr7	128471027	128471217	chr7:128471027-128471217@@FLNC_3==wt
chr7	128471047	128471237	chr7:128471047-128471237@@FLNC_3==wt
chr7	128471067	128471257	chr7:128471067-128471257@@FLNC_3==wt
chr7	128471087	128471277	chr7:128471087-128471277@@FLNC_3==wt
chr7	128471107	128471297	chr7:128471107-128471297@@FLNC_3==wt
chr7	128471127	128471317	chr7:128471127-128471317@@FLNC_3==wt
chr7	128471147	128471337	chr7:128471147-128471337@@FLNC_3==wt
chr7	128471167	128471357	chr7:128471167-128471357@@FLNC_3==wt
chr7	128471187	128471377	chr7:128471187-128471377@@FLNC_3==wt
chr7	128471207	128471397	chr7:128471207-128471397@@FLNC_3==wt
chr7	128471227	128471417	chr7:128471227-128471417@@FLNC_3==wt
chr7	128471247	128471437	chr7:128471247-128471437@@FLNC_3==wt
chr7	128471267	128471457	chr7:128471267-128471457@@FLNC_3==wt
chr7	128471287	128471477	chr7:128471287-128471477@@FLNC_3==wt
chr7	128471307	128471497	chr7:128471307-128471497@@FLNC_3==wt
chr7	128471327	128471517	chr7:128471327-128471517@@FLNC_3==wt
chr7	128471347	128471537	chr7:128471347-128471537@@FLNC_3==wt
chr7	128471367	128471557	chr7:128471367-128471557@@FLNC_3==wt
chr7	128471387	128471577	chr7:128471387-128471577@@FLNC_3==wt
chr7	128471407	128471597	chr7:128471407-128471597@@FLNC_3==wt
chr7	128471427	128471617	chr7:128471427-128471617@@FLNC_3==wt
chr7	128471447	128471637	chr7:128471447-128471637@@FLNC_3==wt
chr7	128471467	128471657	chr7:128471467-128471657@@FLNC_3==wt
chr7	128471487	128471677	chr7:128471487-128471677@@FLNC_3==wt
chr7	128471507	128471697	chr7:128471507-128471697@@FLNC_3==wt
chr7	128471527	128471717	chr7:128471527-128471717@@FLNC_3==wt
chr7	128471547	128471737	chr7:128471547-128471737@@FLNC_3==wt
chr7	128471567	128471757	chr7:128471567-128471757@@FLNC_3==wt
chr7	128471587	128471777	chr7:128471587-128471777@@FLNC_3==wt
chr7	128471607	128471797	chr7:128471607-128471797@@FLNC_3==wt
chr7	128471627	128471817	chr7:128471627-128471817@@FLNC_3==wt
chr7	128471647	128471837	chr7:128471647-128471837@@FLNC_3==wt
chr7	128471667	128471857	chr7:128471667-128471857@@FLNC_3==wt
chr7	128471687	128471877	chr7:128471687-128471877@@FLNC_3==wt
chr7	128471707	128471897	chr7:128471707-128471897@@FLNC_3==wt
chr7	128471727	128471917	chr7:128471727-128471917@@FLNC_3==wt
chr7	128471747	128471937	chr7:128471747-128471937@@FLNC_3==wt
chr7	128471767	128471957	chr7:128471767-128471957@@FLNC_3==wt
chr7	128471787	128471977	chr7:128471787-128471977@@FLNC_3==wt
chr7	128471807	128471997	chr7:128471807-128471997@@FLNC_3==wt
chr7	128471827	128472017	chr7:128471827-128472017@@FLNC_3==wt
chr7	128471847	128472037	chr7:128471847-128472037@@FLNC_3==wt
chr7	128471867	128472057	chr7:128471867-128472057@@FLNC_3==wt
chr7	128471887	128472077	chr7:128471887-128472077@@FLNC_3==wt
chr7	128471907	128472097	chr7:128471907-128472097@@FLNC_3==wt
chr7	128471927	128472117	chr7:128471927-128472117@@FLNC_3==wt
chr7	128471947	128472137	chr7:128471947-128472137@@FLNC_3==wt
chr7	128471967	128472157	chr7:128471967-128472157@@FLNC_3==wt
chr7	128471987	128472177	chr7:128471987-128472177@@FLNC_3==wt
chr7	128472007	128472197	chr7:128472007-128472197@@FLNC_3==wt
chr7	128472027	128472217	chr7:128472027-128472217@@FLNC_3==wt
chr7	128472047	128472237	chr7:128472047-128472237@@FLNC_3==wt
chr7	128472067	128472257	chr7:128472067-128472257@@FLNC_3==wt
chr7	128472087	128472277	chr7:128472087-128472277@@FLNC_3==wt
chr7	128472107	128472297	chr7:128472107-128472297@@FLNC_3==wt
chr7	128472127	128472317	chr7:128472127-128472317@@FLNC_3==wt
chr7	128472147	128472337	chr7:128472147-128472337@@FLNC_3==wt
chr7	128472167	128472357	chr7:128472167-128472357@@FLNC_3==wt
chr7	128472187	128472377	chr7:128472187-128472377@@FLNC_3==wt
chr7	128472207	128472397	chr7:128472207-128472397@@FLNC_3==wt
chr7	128472227	128472417	chr7:128472227-128472417@@FLNC_3==wt
chr7	128472247	128472437	chr7:128472247-128472437@@FLNC_3==wt
chr8	11331324	11331514	chr8:11331324-11331514@@BLK_1==wt
chr8	11331344	11331534	chr8:11331344-11331534@@BLK_1==wt
chr8	11331364	11331554	chr8:11331364-11331554@@BLK_1==wt
chr8	11331384	11331574	chr8:11331384-11331574@@BLK_1==wt
chr8	11331404	11331594	chr8:11331404-11331594@@BLK_1==wt
chr8	11331424	11331614	chr8:11331424-11331614@@BLK_1==wt
[truncated: 5,413 more rows]

## Sheet: Enhancer tiling B library
Chromosome	Start	End	Name
chr2	28497329	28497519	chr2:28497329-28497519@@FOSL2_1==wt
chr2	28497349	28497539	chr2:28497349-28497539@@FOSL2_1==wt
chr2	28497369	28497559	chr2:28497369-28497559@@FOSL2_1==wt
chr2	28497389	28497579	chr2:28497389-28497579@@FOSL2_1==wt
chr2	28497409	28497599	chr2:28497409-28497599@@FOSL2_1==wt
chr2	28497429	28497619	chr2:28497429-28497619@@FOSL2_1==wt
chr2	28497449	28497639	chr2:28497449-28497639@@FOSL2_1==wt
chr2	28497469	28497659	chr2:28497469-28497659@@FOSL2_1==wt
chr2	28497489	28497679	chr2:28497489-28497679@@FOSL2_1==wt
chr2	28497509	28497699	chr2:28497509-28497699@@FOSL2_1==wt
chr2	28497529	28497719	chr2:28497529-28497719@@FOSL2_1==wt
chr2	28497549	28497739	chr2:28497549-28497739@@FOSL2_1==wt
chr2	28497569	28497759	chr2:28497569-28497759@@FOSL2_1==wt
chr2	28497589	28497779	chr2:28497589-28497779@@FOSL2_1==wt
chr2	28497609	28497799	chr2:28497609-28497799@@FOSL2_1==wt
chr2	28497629	28497819	chr2:28497629-28497819@@FOSL2_1==wt
chr2	28497649	28497839	chr2:28497649-28497839@@FOSL2_1==wt
chr2	28497669	28497859	chr2:28497669-28497859@@FOSL2_1==wt
chr2	28497689	28497879	chr2:28497689-28497879@@FOSL2_1==wt
chr2	28497709	28497899	chr2:28497709-28497899@@FOSL2_1==wt
chr2	28497729	28497919	chr2:28497729-28497919@@FOSL2_1==wt
chr2	28497749	28497939	chr2:28497749-28497939@@FOSL2_1==wt
chr2	28497769	28497959	chr2:28497769-28497959@@FOSL2_1==wt
chr2	28497789	28497979	chr2:28497789-28497979@@FOSL2_1==wt
chr2	28497809	28497999	chr2:28497809-28497999@@FOSL2_1==wt
chr2	28497829	28498019	chr2:28497829-28498019@@FOSL2_1==wt
chr2	28497849	28498039	chr2:28497849-28498039@@FOSL2_1==wt
chr2	28497869	28498059	chr2:28497869-28498059@@FOSL2_1==wt
chr2	28497889	28498079	chr2:28497889-28498079@@FOSL2_1==wt
chr2	28497909	28498099	chr2:28497909-28498099@@FOSL2_1==wt
chr2	28497929	28498119	chr2:28497929-28498119@@FOSL2_1==wt
chr2	28497949	28498139	chr2:28497949-28498139@@FOSL2_1==wt
chr2	28497969	28498159	chr2:28497969-28498159@@FOSL2_1==wt
chr2	28497989	28498179	chr2:28497989-28498179@@FOSL2_1==wt
chr2	28498009	28498199	chr2:28498009-28498199@@FOSL2_1==wt
chr2	28498029	28498219	chr2:28498029-28498219@@FOSL2_1==wt
chr2	28498049	28498239	chr2:28498049-28498239@@FOSL2_1==wt
chr2	28498069	28498259	chr2:28498069-28498259@@FOSL2_1==wt
chr2	28498089	28498279	chr2:28498089-28498279@@FOSL2_1==wt
chr2	28498109	28498299	chr2:28498109-28498299@@FOSL2_1==wt
chr2	28498129	28498319	chr2:28498129-28498319@@FOSL2_1==wt
chr2	28498149	28498339	chr2:28498149-28498339@@FOSL2_1==wt
chr2	28498169	28498359	chr2:28498169-28498359@@FOSL2_1==wt
chr2	28498189	28498379	chr2:28498189-28498379@@FOSL2_1==wt
chr2	28498209	28498399	chr2:28498209-28498399@@FOSL2_1==wt
chr2	28498229	28498419	chr2:28498229-28498419@@FOSL2_1==wt
chr2	28498249	28498439	chr2:28498249-28498439@@FOSL2_1==wt
chr2	28498269	28498459	chr2:28498269-28498459@@FOSL2_1==wt
chr2	28498289	28498479	chr2:28498289-28498479@@FOSL2_1==wt
chr2	28498309	28498499	chr2:28498309-28498499@@FOSL2_1==wt
chr2	28498329	28498519	chr2:28498329-28498519@@FOSL2_1==wt
chr2	28498349	28498539	chr2:28498349-28498539@@FOSL2_1==wt
chr2	28498369	28498559	chr2:28498369-28498559@@FOSL2_1==wt
chr2	28498389	28498579	chr2:28498389-28498579@@FOSL2_1==wt
chr2	28498409	28498599	chr2:28498409-28498599@@FOSL2_1==wt
chr2	28498429	28498619	chr2:28498429-28498619@@FOSL2_1==wt
chr2	28498449	28498639	chr2:28498449-28498639@@FOSL2_1==wt
chr2	28498469	28498659	chr2:28498469-28498659@@FOSL2_1==wt
chr2	28498489	28498679	chr2:28498489-28498679@@FOSL2_1==wt
chr2	28498509	28498699	chr2:28498509-28498699@@FOSL2_1==wt
chr2	28498529	28498719	chr2:28498529-28498719@@FOSL2_1==wt
chr2	28498549	28498739	chr2:28498549-28498739@@FOSL2_1==wt
chr2	28498569	28498759	chr2:28498569-28498759@@FOSL2_1==wt
chr2	28498589	28498779	chr2:28498589-28498779@@FOSL2_1==wt
chr2	28498609	28498799	chr2:28498609-28498799@@FOSL2_1==wt
chr2	28498629	28498819	chr2:28498629-28498819@@FOSL2_1==wt
chr2	28498649	28498839	chr2:28498649-28498839@@FOSL2_1==wt
chr2	28498669	28498859	chr2:28498669-28498859@@FOSL2_1==wt
chr2	28498689	28498879	chr2:28498689-28498879@@FOSL2_1==wt
chr2	28498709	28498899	chr2:28498709-28498899@@FOSL2_1==wt
chr2	28498729	28498919	chr2:28498729-28498919@@FOSL2_1==wt
chr2	28498749	28498939	chr2:28498749-28498939@@FOSL2_1==wt
chr2	28498769	28498959	chr2:28498769-28498959@@FOSL2_1==wt
chr2	28498789	28498979	chr2:28498789-28498979@@FOSL2_1==wt
chr2	28498809	28498999	chr2:28498809-28498999@@FOSL2_1==wt
chr2	28498829	28499019	chr2:28498829-28499019@@FOSL2_1==wt
chr2	28498849	28499039	chr2:28498849-28499039@@FOSL2_1==wt
chr2	28498869	28499059	chr2:28498869-28499059@@FOSL2_1==wt
chr2	28498889	28499079	chr2:28498889-28499079@@FOSL2_1==wt
chr2	28498909	28499099	chr2:28498909-28499099@@FOSL2_1==wt
chr2	28498929	28499119	chr2:28498929-28499119@@FOSL2_1==wt
chr2	28498949	28499139	chr2:28498949-28499139@@FOSL2_1==wt
chr2	28498969	28499159	chr2:28498969-28499159@@FOSL2_1==wt
chr2	28498989	28499179	chr2:28498989-28499179@@FOSL2_1==wt
chr2	28499009	28499199	chr2:28499009-28499199@@FOSL2_1==wt
chr2	28499029	28499219	chr2:28499029-28499219@@FOSL2_1==wt
chr2	28499049	28499239	chr2:28499049-28499239@@FOSL2_1==wt
chr2	28499069	28499259	chr2:28499069-28499259@@FOSL2_1==wt
chr2	28499089	28499279	chr2:28499089-28499279@@FOSL2_1==wt
chr2	28499109	28499299	chr2:28499109-28499299@@FOSL2_1==wt
chr2	28499129	28499319	chr2:28499129-28499319@@FOSL2_1==wt
chr2	28499149	28499339	chr2:28499149-28499339@@FOSL2_1==wt
chr2	28499169	28499359	chr2:28499169-28499359@@FOSL2_1==wt
chr2	28499189	28499379	chr2:28499189-28499379@@FOSL2_1==wt
chr2	28499209	28499399	chr2:28499209-28499399@@FOSL2_1==wt
chr2	28499229	28499419	chr2:28499229-28499419@@FOSL2_1==wt
chr2	28499249	28499439	chr2:28499249-28499439@@FOSL2_1==wt
chr2	28499269	28499459	chr2:28499269-28499459@@FOSL2_1==wt
chr2	28499289	28499479	chr2:28499289-28499479@@FOSL2_1==wt
chr2	28499309	28499499	chr2:28499309-28499499@@FOSL2_1==wt
chr2	28499329	28499519	chr2:28499329-28499519@@FOSL2_1==wt
chr2	28499349	28499539	chr2:28499349-28499539@@FOSL2_1==wt
chr2	28499369	28499559	chr2:28499369-28499559@@FOSL2_1==wt
chr2	28499389	28499579	chr2:28499389-28499579@@FOSL2_1==wt
chr2	28499409	28499599	chr2:28499409-28499599@@FOSL2_1==wt
chr2	28499429	28499619	chr2:28499429-28499619@@FOSL2_1==wt
chr2	28499449	28499639	chr2:28499449-28499639@@FOSL2_1==wt
chr2	28499469	28499659	chr2:28499469-28499659@@FOSL2_1==wt
chr2	28499489	28499679	chr2:28499489-28499679@@FOSL2_1==wt
chr2	28499509	28499699	chr2:28499509-28499699@@FOSL2_1==wt
chr2	28499529	28499719	chr2:28499529-28499719@@FOSL2_1==wt
chr2	28499549	28499739	chr2:28499549-28499739@@FOSL2_1==wt
chr2	28499569	28499759	chr2:28499569-28499759@@FOSL2_1==wt
chr2	28499589	28499779	chr2:28499589-28499779@@FOSL2_1==wt
chr2	28499609	28499799	chr2:28499609-28499799@@FOSL2_1==wt
chr2	28499629	28499819	chr2:28499629-28499819@@FOSL2_1==wt
chr2	28499649	28499839	chr2:28499649-28499839@@FOSL2_1==wt
chr2	28499669	28499859	chr2:28499669-28499859@@FOSL2_1==wt
chr2	28499689	28499879	chr2:28499689-28499879@@FOSL2_1==wt
chr2	28499709	28499899	chr2:28499709-28499899@@FOSL2_1==wt
chr2	28499729	28499919	chr2:28499729-28499919@@FOSL2_1==wt
chr2	28499749	28499939	chr2:28499749-28499939@@FOSL2_1==wt
chr2	28499769	28499959	chr2:28499769-28499959@@FOSL2_1==wt
chr2	28499789	28499979	chr2:28499789-28499979@@FOSL2_1==wt
chr2	28499809	28499999	chr2:28499809-28499999@@FOSL2_1==wt
chr2	28499829	28500019	chr2:28499829-28500019@@FOSL2_1==wt
chr2	28499849	28500039	chr2:28499849-28500039@@FOSL2_1==wt
chr2	28499869	28500059	chr2:28499869-28500059@@FOSL2_1==wt
chr2	28499889	28500079	chr2:28499889-28500079@@FOSL2_1==wt
chr2	28499909	28500099	chr2:28499909-28500099@@FOSL2_1==wt
chr2	28499929	28500119	chr2:28499929-28500119@@FOSL2_1==wt
chr2	28499949	28500139	chr2:28499949-28500139@@FOSL2_1==wt
chr2	28499969	28500159	chr2:28499969-28500159@@FOSL2_1==wt
chr2	133173235	133173425	chr2:133173235-133173425@@GPR39_1==wt
chr2	133173255	133173445	chr2:133173255-133173445@@GPR39_1==wt
chr2	133173275	133173465	chr2:133173275-133173465@@GPR39_1==wt
chr2	133173295	133173485	chr2:133173295-133173485@@GPR39_1==wt
chr2	133173315	133173505	chr2:133173315-133173505@@GPR39_1==wt
chr2	133173335	133173525	chr2:133173335-133173525@@GPR39_1==wt
chr2	133173355	133173545	chr2:133173355-133173545@@GPR39_1==wt
chr2	133173375	133173565	chr2:133173375-133173565@@GPR39_1==wt
chr2	133173395	133173585	chr2:133173395-133173585@@GPR39_1==wt
chr2	133173415	133173605	chr2:133173415-133173605@@GPR39_1==wt
chr2	133173435	133173625	chr2:133173435-133173625@@GPR39_1==wt
chr2	133173455	133173645	chr2:133173455-133173645@@GPR39_1==wt
chr2	133173475	133173665	chr2:133173475-133173665@@GPR39_1==wt
chr2	133173495	133173685	chr2:133173495-133173685@@GPR39_1==wt
chr2	133173515	133173705	chr2:133173515-133173705@@GPR39_1==wt
chr2	133173535	133173725	chr2:133173535-133173725@@GPR39_1==wt
chr2	133173555	133173745	chr2:133173555-133173745@@GPR39_1==wt
chr2	133173575	133173765	chr2:133173575-133173765@@GPR39_1==wt
chr2	133173595	133173785	chr2:133173595-133173785@@GPR39_1==wt
chr2	133173615	133173805	chr2:133173615-133173805@@GPR39_1==wt
chr2	133173635	133173825	chr2:133173635-133173825@@GPR39_1==wt
chr2	133173655	133173845	chr2:133173655-133173845@@GPR39_1==wt
chr2	133173675	133173865	chr2:133173675-133173865@@GPR39_1==wt
chr2	133173695	133173885	chr2:133173695-133173885@@GPR39_1==wt
chr2	133173715	133173905	chr2:133173715-133173905@@GPR39_1==wt
chr2	133173735	133173925	chr2:133173735-133173925@@GPR39_1==wt
chr2	133173755	133173945	chr2:133173755-133173945@@GPR39_1==wt
chr2	133173775	133173965	chr2:133173775-133173965@@GPR39_1==wt
chr2	133173795	133173985	chr2:133173795-133173985@@GPR39_1==wt
chr2	133173815	133174005	chr2:133173815-133174005@@GPR39_1==wt
chr2	133173835	133174025	chr2:133173835-133174025@@GPR39_1==wt
chr2	133173855	133174045	chr2:133173855-133174045@@GPR39_1==wt
chr2	133173875	133174065	chr2:133173875-133174065@@GPR39_1==wt
chr2	133173895	133174085	chr2:133173895-133174085@@GPR39_1==wt
chr2	133173915	133174105	chr2:133173915-133174105@@GPR39_1==wt
chr2	133173935	133174125	chr2:133173935-133174125@@GPR39_1==wt
chr2	133173955	133174145	chr2:133173955-133174145@@GPR39_1==wt
chr2	133173975	133174165	chr2:133173975-133174165@@GPR39_1==wt
chr2	133173995	133174185	chr2:133173995-133174185@@GPR39_1==wt
chr2	133174015	133174205	chr2:133174015-133174205@@GPR39_1==wt
chr2	133174035	133174225	chr2:133174035-133174225@@GPR39_1==wt
chr2	133174055	133174245	chr2:133174055-133174245@@GPR39_1==wt
chr2	133174075	133174265	chr2:133174075-133174265@@GPR39_1==wt
chr2	133174095	133174285	chr2:133174095-133174285@@GPR39_1==wt
chr2	133174115	133174305	chr2:133174115-133174305@@GPR39_1==wt
chr2	133174135	133174325	chr2:133174135-133174325@@GPR39_1==wt
chr2	133174155	133174345	chr2:133174155-133174345@@GPR39_1==wt
chr2	133174175	133174365	chr2:133174175-133174365@@GPR39_1==wt
chr2	133174195	133174385	chr2:133174195-133174385@@GPR39_1==wt
chr2	133174215	133174405	chr2:133174215-133174405@@GPR39_1==wt
chr2	133174235	133174425	chr2:133174235-133174425@@GPR39_1==wt
chr2	133174255	133174445	chr2:133174255-133174445@@GPR39_1==wt
chr2	133174275	133174465	chr2:133174275-133174465@@GPR39_1==wt
chr2	133174295	133174485	chr2:133174295-133174485@@GPR39_1==wt
chr2	133174315	133174505	chr2:133174315-133174505@@GPR39_1==wt
chr2	133174335	133174525	chr2:133174335-133174525@@GPR39_1==wt
chr2	133174355	133174545	chr2:133174355-133174545@@GPR39_1==wt
chr2	133174375	133174565	chr2:133174375-133174565@@GPR39_1==wt
chr2	133174395	133174585	chr2:133174395-133174585@@GPR39_1==wt
chr2	133174415	133174605	chr2:133174415-133174605@@GPR39_1==wt
chr2	133174435	133174625	chr2:133174435-133174625@@GPR39_1==wt
chr2	133174455	133174645	chr2:133174455-133174645@@GPR39_1==wt
chr2	133174475	133174665	chr2:133174475-133174665@@GPR39_1==wt
chr2	133174495	133174685	chr2:133174495-133174685@@GPR39_1==wt
chr2	133174515	133174705	chr2:133174515-133174705@@GPR39_1==wt
chr2	133174535	133174725	chr2:133174535-133174725@@GPR39_1==wt
chr2	133174555	133174745	chr2:133174555-133174745@@GPR39_1==wt
chr2	133174575	133174765	chr2:133174575-133174765@@GPR39_1==wt
chr2	133174595	133174785	chr2:133174595-133174785@@GPR39_1==wt
chr2	133174615	133174805	chr2:133174615-133174805@@GPR39_1==wt
chr2	133174635	133174825	chr2:133174635-133174825@@GPR39_1==wt
chr2	133174655	133174845	chr2:133174655-133174845@@GPR39_1==wt
chr2	133174675	133174865	chr2:133174675-133174865@@GPR39_1==wt
chr2	133174695	133174885	chr2:133174695-133174885@@GPR39_1==wt
chr2	133174715	133174905	chr2:133174715-133174905@@GPR39_1==wt
chr2	133174735	133174925	chr2:133174735-133174925@@GPR39_1==wt
chr2	133174755	133174945	chr2:133174755-133174945@@GPR39_1==wt
chr2	133174775	133174965	chr2:133174775-133174965@@GPR39_1==wt
chr2	133174795	133174985	chr2:133174795-133174985@@GPR39_1==wt
chr2	133174815	133175005	chr2:133174815-133175005@@GPR39_1==wt
chr2	133174835	133175025	chr2:133174835-133175025@@GPR39_1==wt
chr2	133174855	133175045	chr2:133174855-133175045@@GPR39_1==wt
chr2	133174875	133175065	chr2:133174875-133175065@@GPR39_1==wt
chr2	133174895	133175085	chr2:133174895-133175085@@GPR39_1==wt
chr2	133174915	133175105	chr2:133174915-133175105@@GPR39_1==wt
chr2	133174935	133175125	chr2:133174935-133175125@@GPR39_1==wt
chr2	133174955	133175145	chr2:133174955-133175145@@GPR39_1==wt
chr2	133174975	133175165	chr2:133174975-133175165@@GPR39_1==wt
chr2	133174995	133175185	chr2:133174995-133175185@@GPR39_1==wt
chr2	133175015	133175205	chr2:133175015-133175205@@GPR39_1==wt
chr2	133175035	133175225	chr2:133175035-133175225@@GPR39_1==wt
chr2	133175055	133175245	chr2:133175055-133175245@@GPR39_1==wt
chr2	133175075	133175265	chr2:133175075-133175265@@GPR39_1==wt
chr2	133175095	133175285	chr2:133175095-133175285@@GPR39_1==wt
chr2	133175115	133175305	chr2:133175115-133175305@@GPR39_1==wt
chr2	133175135	133175325	chr2:133175135-133175325@@GPR39_1==wt
chr2	133175155	133175345	chr2:133175155-133175345@@GPR39_1==wt
chr2	133175175	133175365	chr2:133175175-133175365@@GPR39_1==wt
chr2	133175195	133175385	chr2:133175195-133175385@@GPR39_1==wt
chr2	133175215	133175405	chr2:133175215-133175405@@GPR39_1==wt
chr2	133175235	133175425	chr2:133175235-133175425@@GPR39_1==wt
chr2	133175255	133175445	chr2:133175255-133175445@@GPR39_1==wt
chr2	133175275	133175465	chr2:133175275-133175465@@GPR39_1==wt
chr2	133175295	133175485	chr2:133175295-133175485@@GPR39_1==wt
chr2	133175315	133175505	chr2:133175315-133175505@@GPR39_1==wt
chr2	133175335	133175525	chr2:133175335-133175525@@GPR39_1==wt
chr2	133175355	133175545	chr2:133175355-133175545@@GPR39_1==wt
chr2	133175375	133175565	chr2:133175375-133175565@@GPR39_1==wt
chr2	133175395	133175585	chr2:133175395-133175585@@GPR39_1==wt
chr2	133175415	133175605	chr2:133175415-133175605@@GPR39_1==wt
chr2	133175435	133175625	chr2:133175435-133175625@@GPR39_1==wt
chr2	133195738	133195928	chr2:133195738-133195928@@GPR39_2==wt
chr2	133195758	133195948	chr2:133195758-133195948@@GPR39_2==wt
chr2	133195778	133195968	chr2:133195778-133195968@@GPR39_2==wt
chr2	133195798	133195988	chr2:133195798-133195988@@GPR39_2==wt
chr2	133195818	133196008	chr2:133195818-133196008@@GPR39_2==wt
chr2	133195838	133196028	chr2:133195838-133196028@@GPR39_2==wt
chr2	133195858	133196048	chr2:133195858-133196048@@GPR39_2==wt
chr2	133195878	133196068	chr2:133195878-133196068@@GPR39_2==wt
chr2	133195898	133196088	chr2:133195898-133196088@@GPR39_2==wt
chr2	133195918	133196108	chr2:133195918-133196108@@GPR39_2==wt
chr2	133195938	133196128	chr2:133195938-133196128@@GPR39_2==wt
chr2	133195958	133196148	chr2:133195958-133196148@@GPR39_2==wt
chr2	133195978	133196168	chr2:133195978-133196168@@GPR39_2==wt
chr2	133195998	133196188	chr2:133195998-133196188@@GPR39_2==wt
chr2	133196018	133196208	chr2:133196018-133196208@@GPR39_2==wt
chr2	133196038	133196228	chr2:133196038-133196228@@GPR39_2==wt
chr2	133196058	133196248	chr2:133196058-133196248@@GPR39_2==wt
chr2	133196078	133196268	chr2:133196078-133196268@@GPR39_2==wt
chr2	133196098	133196288	chr2:133196098-133196288@@GPR39_2==wt
chr2	133196118	133196308	chr2:133196118-133196308@@GPR39_2==wt
chr2	133196138	133196328	chr2:133196138-133196328@@GPR39_2==wt
chr2	133196158	133196348	chr2:133196158-133196348@@GPR39_2==wt
chr2	133196178	133196368	chr2:133196178-133196368@@GPR39_2==wt
chr2	133196198	133196388	chr2:133196198-133196388@@GPR39_2==wt
chr2	133196218	133196408	chr2:133196218-133196408@@GPR39_2==wt
chr2	133196238	133196428	chr2:133196238-133196428@@GPR39_2==wt
chr2	133196258	133196448	chr2:133196258-133196448@@GPR39_2==wt
chr2	133196278	133196468	chr2:133196278-133196468@@GPR39_2==wt
chr2	133196298	133196488	chr2:133196298-133196488@@GPR39_2==wt
chr2	133196318	133196508	chr2:133196318-133196508@@GPR39_2==wt
chr2	133196338	133196528	chr2:133196338-133196528@@GPR39_2==wt
chr2	133196358	133196548	chr2:133196358-133196548@@GPR39_2==wt
chr2	133196378	133196568	chr2:133196378-133196568@@GPR39_2==wt
chr2	133196398	133196588	chr2:133196398-133196588@@GPR39_2==wt
chr2	133196418	133196608	chr2:133196418-133196608@@GPR39_2==wt
chr2	133196438	133196628	chr2:133196438-133196628@@GPR39_2==wt
chr2	133196458	133196648	chr2:133196458-133196648@@GPR39_2==wt
chr2	133196478	133196668	chr2:133196478-133196668@@GPR39_2==wt
chr2	133196498	133196688	chr2:133196498-133196688@@GPR39_2==wt
chr2	133196518	133196708	chr2:133196518-133196708@@GPR39_2==wt
chr2	133196538	133196728	chr2:133196538-133196728@@GPR39_2==wt
chr2	133196558	133196748	chr2:133196558-133196748@@GPR39_2==wt
chr2	133196578	133196768	chr2:133196578-133196768@@GPR39_2==wt
chr2	133196598	133196788	chr2:133196598-133196788@@GPR39_2==wt
chr2	133196618	133196808	chr2:133196618-133196808@@GPR39_2==wt
chr2	133196638	133196828	chr2:133196638-133196828@@GPR39_2==wt
chr2	133196658	133196848	chr2:133196658-133196848@@GPR39_2==wt
chr2	133196678	133196868	chr2:133196678-133196868@@GPR39_2==wt
chr2	133196698	133196888	chr2:133196698-133196888@@GPR39_2==wt
chr2	133196718	133196908	chr2:133196718-133196908@@GPR39_2==wt
chr2	133196738	133196928	chr2:133196738-133196928@@GPR39_2==wt
chr2	133196758	133196948	chr2:133196758-133196948@@GPR39_2==wt
chr2	133196778	133196968	chr2:133196778-133196968@@GPR39_2==wt
chr2	133196798	133196988	chr2:133196798-133196988@@GPR39_2==wt
chr2	133196818	133197008	chr2:133196818-133197008@@GPR39_2==wt
chr2	133196838	133197028	chr2:133196838-133197028@@GPR39_2==wt
chr2	133196858	133197048	chr2:133196858-133197048@@GPR39_2==wt
chr2	133196878	133197068	chr2:133196878-133197068@@GPR39_2==wt
chr2	133196898	133197088	chr2:133196898-133197088@@GPR39_2==wt
chr2	133196918	133197108	chr2:133196918-133197108@@GPR39_2==wt
chr2	133196938	133197128	chr2:133196938-133197128@@GPR39_2==wt
chr2	133196958	133197148	chr2:133196958-133197148@@GPR39_2==wt
chr2	133196978	133197168	chr2:133196978-133197168@@GPR39_2==wt
chr2	133196998	133197188	chr2:133196998-133197188@@GPR39_2==wt
chr2	133197018	133197208	chr2:133197018-133197208@@GPR39_2==wt
chr2	133197038	133197228	chr2:133197038-133197228@@GPR39_2==wt
chr2	133197058	133197248	chr2:133197058-133197248@@GPR39_2==wt
chr2	133197078	133197268	chr2:133197078-133197268@@GPR39_2==wt
chr2	133197098	133197288	chr2:133197098-133197288@@GPR39_2==wt
chr2	133197118	133197308	chr2:133197118-133197308@@GPR39_2==wt
chr2	133197138	133197328	chr2:133197138-133197328@@GPR39_2==wt
chr2	133197158	133197348	chr2:133197158-133197348@@GPR39_2==wt
chr2	133197178	133197368	chr2:133197178-133197368@@GPR39_2==wt
chr2	133197198	133197388	chr2:133197198-133197388@@GPR39_2==wt
chr2	133197218	133197408	chr2:133197218-133197408@@GPR39_2==wt
chr2	133197238	133197428	chr2:133197238-133197428@@GPR39_2==wt
chr2	133197258	133197448	chr2:133197258-133197448@@GPR39_2==wt
chr2	133197278	133197468	chr2:133197278-133197468@@GPR39_2==wt
chr2	133197298	133197488	chr2:133197298-133197488@@GPR39_2==wt
chr2	133197318	133197508	chr2:133197318-133197508@@GPR39_2==wt
chr2	133197338	133197528	chr2:133197338-133197528@@GPR39_2==wt
chr2	133197358	133197548	chr2:133197358-133197548@@GPR39_2==wt
chr2	133197378	133197568	chr2:133197378-133197568@@GPR39_2==wt
chr2	133197398	133197588	chr2:133197398-133197588@@GPR39_2==wt
chr2	133197418	133197608	chr2:133197418-133197608@@GPR39_2==wt
chr2	133197438	133197628	chr2:133197438-133197628@@GPR39_2==wt
chr2	133197458	133197648	chr2:133197458-133197648@@GPR39_2==wt
chr2	133197478	133197668	chr2:133197478-133197668@@GPR39_2==wt
chr2	133197498	133197688	chr2:133197498-133197688@@GPR39_2==wt
chr2	133197518	133197708	chr2:133197518-133197708@@GPR39_2==wt
chr2	133197538	133197728	chr2:133197538-133197728@@GPR39_2==wt
chr2	133197558	133197748	chr2:133197558-133197748@@GPR39_2==wt
chr2	133197578	133197768	chr2:133197578-133197768@@GPR39_2==wt
chr2	133197598	133197788	chr2:133197598-133197788@@GPR39_2==wt
chr2	133197618	133197808	chr2:133197618-133197808@@GPR39_2==wt
chr2	133197638	133197828	chr2:133197638-133197828@@GPR39_2==wt
chr2	133197658	133197848	chr2:133197658-133197848@@GPR39_2==wt
chr2	133197678	133197868	chr2:133197678-133197868@@GPR39_2==wt
chr2	133197698	133197888	chr2:133197698-133197888@@GPR39_2==wt
chr2	133197718	133197908	chr2:133197718-133197908@@GPR39_2==wt
chr2	133197738	133197928	chr2:133197738-133197928@@GPR39_2==wt
chr2	133197758	133197948	chr2:133197758-133197948@@GPR39_2==wt
chr2	133197778	133197968	chr2:133197778-133197968@@GPR39_2==wt
chr2	133197798	133197988	chr2:133197798-133197988@@GPR39_2==wt
chr2	133197818	133198008	chr2:133197818-133198008@@GPR39_2==wt
chr2	133197838	133198028	chr2:133197838-133198028@@GPR39_2==wt
chr2	133197858	133198048	chr2:133197858-133198048@@GPR39_2==wt
chr2	133197878	133198068	chr2:133197878-133198068@@GPR39_2==wt
chr2	133197898	133198088	chr2:133197898-133198088@@GPR39_2==wt
chr2	133197918	133198108	chr2:133197918-133198108@@GPR39_2==wt
chr2	133197938	133198128	chr2:133197938-133198128@@GPR39_2==wt
chr2	133197958	133198148	chr2:133197958-133198148@@GPR39_2==wt
chr2	133197978	133198168	chr2:133197978-133198168@@GPR39_2==wt
chr2	133197998	133198188	chr2:133197998-133198188@@GPR39_2==wt
chr2	133380127	133380317	chr2:133380127-133380317@@GPR39_3==wt
chr2	133380147	133380337	chr2:133380147-133380337@@GPR39_3==wt
chr2	133380167	133380357	chr2:133380167-133380357@@GPR39_3==wt
chr2	133380187	133380377	chr2:133380187-133380377@@GPR39_3==wt
chr2	133380207	133380397	chr2:133380207-133380397@@GPR39_3==wt
chr2	133380227	133380417	chr2:133380227-133380417@@GPR39_3==wt
chr2	133380247	133380437	chr2:133380247-133380437@@GPR39_3==wt
chr2	133380267	133380457	chr2:133380267-133380457@@GPR39_3==wt
chr2	133380287	133380477	chr2:133380287-133380477@@GPR39_3==wt
chr2	133380307	133380497	chr2:133380307-133380497@@GPR39_3==wt
chr2	133380327	133380517	chr2:133380327-133380517@@GPR39_3==wt
chr2	133380347	133380537	chr2:133380347-133380537@@GPR39_3==wt
chr2	133380367	133380557	chr2:133380367-133380557@@GPR39_3==wt
chr2	133380387	133380577	chr2:133380387-133380577@@GPR39_3==wt
chr2	133380407	133380597	chr2:133380407-133380597@@GPR39_3==wt
chr2	133380427	133380617	chr2:133380427-133380617@@GPR39_3==wt
chr2	133380447	133380637	chr2:133380447-133380637@@GPR39_3==wt
chr2	133380467	133380657	chr2:133380467-133380657@@GPR39_3==wt
chr2	133380487	133380677	chr2:133380487-133380677@@GPR39_3==wt
chr2	133380507	133380697	chr2:133380507-133380697@@GPR39_3==wt
chr2	133380527	133380717	chr2:133380527-133380717@@GPR39_3==wt
chr2	133380547	133380737	chr2:133380547-133380737@@GPR39_3==wt
chr2	133380567	133380757	chr2:133380567-133380757@@GPR39_3==wt
chr2	133380587	133380777	chr2:133380587-133380777@@GPR39_3==wt
chr2	133380607	133380797	chr2:133380607-133380797@@GPR39_3==wt
chr2	133380627	133380817	chr2:133380627-133380817@@GPR39_3==wt
chr2	133380647	133380837	chr2:133380647-133380837@@GPR39_3==wt
chr2	133380667	133380857	chr2:133380667-133380857@@GPR39_3==wt
chr2	133380687	133380877	chr2:133380687-133380877@@GPR39_3==wt
chr2	133380707	133380897	chr2:133380707-133380897@@GPR39_3==wt
chr2	133380727	133380917	chr2:133380727-133380917@@GPR39_3==wt
chr2	133380747	133380937	chr2:133380747-133380937@@GPR39_3==wt
chr2	133380767	133380957	chr2:133380767-133380957@@GPR39_3==wt
chr2	133380787	133380977	chr2:133380787-133380977@@GPR39_3==wt
chr2	133380807	133380997	chr2:133380807-133380997@@GPR39_3==wt
chr2	133380827	133381017	chr2:133380827-133381017@@GPR39_3==wt
chr2	133380847	133381037	chr2:133380847-133381037@@GPR39_3==wt
chr2	133380867	133381057	chr2:133380867-133381057@@GPR39_3==wt
chr2	133380887	133381077	chr2:133380887-133381077@@GPR39_3==wt
chr2	133380907	133381097	chr2:133380907-133381097@@GPR39_3==wt
chr2	133380927	133381117	chr2:133380927-133381117@@GPR39_3==wt
chr2	133380947	133381137	chr2:133380947-133381137@@GPR39_3==wt
chr2	133380967	133381157	chr2:133380967-133381157@@GPR39_3==wt
chr2	133380987	133381177	chr2:133380987-133381177@@GPR39_3==wt
chr2	133381007	133381197	chr2:133381007-133381197@@GPR39_3==wt
chr2	133381027	133381217	chr2:133381027-133381217@@GPR39_3==wt
chr2	133381047	133381237	chr2:133381047-133381237@@GPR39_3==wt
chr2	133381067	133381257	chr2:133381067-133381257@@GPR39_3==wt
chr2	133381087	133381277	chr2:133381087-133381277@@GPR39_3==wt
chr2	133381107	133381297	chr2:133381107-133381297@@GPR39_3==wt
chr2	133381127	133381317	chr2:133381127-133381317@@GPR39_3==wt
chr2	133381147	133381337	chr2:133381147-133381337@@GPR39_3==wt
chr2	133381167	133381357	chr2:133381167-133381357@@GPR39_3==wt
chr2	133381187	133381377	chr2:133381187-133381377@@GPR39_3==wt
chr2	133381207	133381397	chr2:133381207-133381397@@GPR39_3==wt
chr2	133381227	133381417	chr2:133381227-133381417@@GPR39_3==wt
chr2	133381247	133381437	chr2:133381247-133381437@@GPR39_3==wt
chr2	133381267	133381457	chr2:133381267-133381457@@GPR39_3==wt
chr2	133381287	133381477	chr2:133381287-133381477@@GPR39_3==wt
chr2	133381307	133381497	chr2:133381307-133381497@@GPR39_3==wt
chr2	133381327	133381517	chr2:133381327-133381517@@GPR39_3==wt
chr2	133381347	133381537	chr2:133381347-133381537@@GPR39_3==wt
chr2	133381367	133381557	chr2:133381367-133381557@@GPR39_3==wt
chr2	133381387	133381577	chr2:133381387-133381577@@GPR39_3==wt
chr2	133381407	133381597	chr2:133381407-133381597@@GPR39_3==wt
chr2	133381427	133381617	chr2:133381427-133381617@@GPR39_3==wt
chr2	133381447	133381637	chr2:133381447-133381637@@GPR39_3==wt
chr2	133381467	133381657	chr2:133381467-133381657@@GPR39_3==wt
chr2	133381487	133381677	chr2:133381487-133381677@@GPR39_3==wt
chr2	133381507	133381697	chr2:133381507-133381697@@GPR39_3==wt
chr2	133381527	133381717	chr2:133381527-133381717@@GPR39_3==wt
chr2	133381547	133381737	chr2:133381547-133381737@@GPR39_3==wt
chr2	133381567	133381757	chr2:133381567-133381757@@GPR39_3==wt
chr2	133381587	133381777	chr2:133381587-133381777@@GPR39_3==wt
chr2	133381607	133381797	chr2:133381607-133381797@@GPR39_3==wt
chr2	133381627	133381817	chr2:133381627-133381817@@GPR39_3==wt
chr2	133381647	133381837	chr2:133381647-133381837@@GPR39_3==wt
chr2	133381667	133381857	chr2:133381667-133381857@@GPR39_3==wt
chr2	133381687	133381877	chr2:133381687-133381877@@GPR39_3==wt
chr2	133381707	133381897	chr2:133381707-133381897@@GPR39_3==wt
chr2	133381727	133381917	chr2:133381727-133381917@@GPR39_3==wt
chr2	133381747	133381937	chr2:133381747-133381937@@GPR39_3==wt
chr2	133381767	133381957	chr2:133381767-133381957@@GPR39_3==wt
chr2	133381787	133381977	chr2:133381787-133381977@@GPR39_3==wt
chr2	133381807	133381997	chr2:133381807-133381997@@GPR39_3==wt
chr2	133381827	133382017	chr2:133381827-133382017@@GPR39_3==wt
chr2	133381847	133382037	chr2:133381847-133382037@@GPR39_3==wt
chr2	133381867	133382057	chr2:133381867-133382057@@GPR39_3==wt
chr2	133381887	133382077	chr2:133381887-133382077@@GPR39_3==wt
chr2	133381907	133382097	chr2:133381907-133382097@@GPR39_3==wt
chr2	133381927	133382117	chr2:133381927-133382117@@GPR39_3==wt
chr2	133381947	133382137	chr2:133381947-133382137@@GPR39_3==wt
chr2	133381967	133382157	chr2:133381967-133382157@@GPR39_3==wt
chr2	133381987	133382177	chr2:133381987-133382177@@GPR39_3==wt
chr2	133382007	133382197	chr2:133382007-133382197@@GPR39_3==wt
chr3	69985229	69985419	chr3:69985229-69985419@@MITF_1==wt
chr3	69985249	69985439	chr3:69985249-69985439@@MITF_1==wt
chr3	69985269	69985459	chr3:69985269-69985459@@MITF_1==wt
chr3	69985289	69985479	chr3:69985289-69985479@@MITF_1==wt
chr3	69985309	69985499	chr3:69985309-69985499@@MITF_1==wt
chr3	69985329	69985519	chr3:69985329-69985519@@MITF_1==wt
chr3	69985349	69985539	chr3:69985349-69985539@@MITF_1==wt
chr3	69985369	69985559	chr3:69985369-69985559@@MITF_1==wt
chr3	69985389	69985579	chr3:69985389-69985579@@MITF_1==wt
chr3	69985409	69985599	chr3:69985409-69985599@@MITF_1==wt
chr3	69985429	69985619	chr3:69985429-69985619@@MITF_1==wt
chr3	69985449	69985639	chr3:69985449-69985639@@MITF_1==wt
chr3	69985469	69985659	chr3:69985469-69985659@@MITF_1==wt
chr3	69985489	69985679	chr3:69985489-69985679@@MITF_1==wt
chr3	69985509	69985699	chr3:69985509-69985699@@MITF_1==wt
chr3	69985529	69985719	chr3:69985529-69985719@@MITF_1==wt
chr3	69985549	69985739	chr3:69985549-69985739@@MITF_1==wt
chr3	69985569	69985759	chr3:69985569-69985759@@MITF_1==wt
chr3	69985589	69985779	chr3:69985589-69985779@@MITF_1==wt
chr3	69985609	69985799	chr3:69985609-69985799@@MITF_1==wt
chr3	69985629	69985819	chr3:69985629-69985819@@MITF_1==wt
chr3	69985649	69985839	chr3:69985649-69985839@@MITF_1==wt
chr3	69985669	69985859	chr3:69985669-69985859@@MITF_1==wt
chr3	69985689	69985879	chr3:69985689-69985879@@MITF_1==wt
chr3	69985709	69985899	chr3:69985709-69985899@@MITF_1==wt
chr3	69985729	69985919	chr3:69985729-69985919@@MITF_1==wt
chr3	69985749	69985939	chr3:69985749-69985939@@MITF_1==wt
chr3	69985769	69985959	chr3:69985769-69985959@@MITF_1==wt
chr3	69985789	69985979	chr3:69985789-69985979@@MITF_1==wt
chr3	69985809	69985999	chr3:69985809-69985999@@MITF_1==wt
chr3	69985829	69986019	chr3:69985829-69986019@@MITF_1==wt
chr3	69985849	69986039	chr3:69985849-69986039@@MITF_1==wt
chr3	69985869	69986059	chr3:69985869-69986059@@MITF_1==wt
chr3	69985889	69986079	chr3:69985889-69986079@@MITF_1==wt
chr3	69985909	69986099	chr3:69985909-69986099@@MITF_1==wt
chr3	69985929	69986119	chr3:69985929-69986119@@MITF_1==wt
chr3	69985949	69986139	chr3:69985949-69986139@@MITF_1==wt
chr3	69985969	69986159	chr3:69985969-69986159@@MITF_1==wt
chr3	69985989	69986179	chr3:69985989-69986179@@MITF_1==wt
chr3	69986009	69986199	chr3:69986009-69986199@@MITF_1==wt
chr3	69986029	69986219	chr3:69986029-69986219@@MITF_1==wt
chr3	69986049	69986239	chr3:69986049-69986239@@MITF_1==wt
chr3	69986069	69986259	chr3:69986069-69986259@@MITF_1==wt
chr3	69986089	69986279	chr3:69986089-69986279@@MITF_1==wt
chr3	69986109	69986299	chr3:69986109-69986299@@MITF_1==wt
chr3	69986129	69986319	chr3:69986129-69986319@@MITF_1==wt
chr3	69986149	69986339	chr3:69986149-69986339@@MITF_1==wt
chr3	69986169	69986359	chr3:69986169-69986359@@MITF_1==wt
chr3	69986189	69986379	chr3:69986189-69986379@@MITF_1==wt
chr3	69986209	69986399	chr3:69986209-69986399@@MITF_1==wt
chr3	69986229	69986419	chr3:69986229-69986419@@MITF_1==wt
chr3	69986249	69986439	chr3:69986249-69986439@@MITF_1==wt
chr3	69986269	69986459	chr3:69986269-69986459@@MITF_1==wt
chr3	69986289	69986479	chr3:69986289-69986479@@MITF_1==wt
chr3	69986309	69986499	chr3:69986309-69986499@@MITF_1==wt
chr3	69986329	69986519	chr3:69986329-69986519@@MITF_1==wt
chr3	69986349	69986539	chr3:69986349-69986539@@MITF_1==wt
chr3	69986369	69986559	chr3:69986369-69986559@@MITF_1==wt
chr3	69986389	69986579	chr3:69986389-69986579@@MITF_1==wt
chr3	69986409	69986599	chr3:69986409-69986599@@MITF_1==wt
chr3	69986429	69986619	chr3:69986429-69986619@@MITF_1==wt
chr3	69986449	69986639	chr3:69986449-69986639@@MITF_1==wt
chr3	69986469	69986659	chr3:69986469-69986659@@MITF_1==wt
chr3	69986489	69986679	chr3:69986489-69986679@@MITF_1==wt
chr3	69986509	69986699	chr3:69986509-69986699@@MITF_1==wt
chr3	69986529	69986719	chr3:69986529-69986719@@MITF_1==wt
chr3	69986549	69986739	chr3:69986549-69986739@@MITF_1==wt
chr3	69986569	69986759	chr3:69986569-69986759@@MITF_1==wt
chr3	69986589	69986779	chr3:69986589-69986779@@MITF_1==wt
chr3	69986609	69986799	chr3:69986609-69986799@@MITF_1==wt
chr3	69986629	69986819	chr3:69986629-69986819@@MITF_1==wt
chr3	69986649	69986839	chr3:69986649-69986839@@MITF_1==wt
chr3	69986669	69986859	chr3:69986669-69986859@@MITF_1==wt
chr3	69986689	69986879	chr3:69986689-69986879@@MITF_1==wt
chr3	69986709	69986899	chr3:69986709-69986899@@MITF_1==wt
chr3	69986729	69986919	chr3:69986729-69986919@@MITF_1==wt
chr3	69986749	69986939	chr3:69986749-69986939@@MITF_1==wt
chr3	69986769	69986959	chr3:69986769-69986959@@MITF_1==wt
chr3	69986789	69986979	chr3:69986789-69986979@@MITF_1==wt
chr3	69986809	69986999	chr3:69986809-69986999@@MITF_1==wt
chr3	69986829	69987019	chr3:69986829-69987019@@MITF_1==wt
chr3	69986849	69987039	chr3:69986849-69987039@@MITF_1==wt
chr3	69986869	69987059	chr3:69986869-69987059@@MITF_1==wt
chr3	69986889	69987079	chr3:69986889-69987079@@MITF_1==wt
chr3	69986909	69987099	chr3:69986909-69987099@@MITF_1==wt
chr3	69986929	69987119	chr3:69986929-69987119@@MITF_1==wt
chr3	69986949	69987139	chr3:69986949-69987139@@MITF_1==wt
chr3	69986969	69987159	chr3:69986969-69987159@@MITF_1==wt
chr3	69986989	69987179	chr3:69986989-69987179@@MITF_1==wt
chr3	69987009	69987199	chr3:69987009-69987199@@MITF_1==wt
chr3	69987029	69987219	chr3:69987029-69987219@@MITF_1==wt
chr3	69987049	69987239	chr3:69987049-69987239@@MITF_1==wt
chr3	69987069	69987259	chr3:69987069-69987259@@MITF_1==wt
chr3	69987089	69987279	chr3:69987089-69987279@@MITF_1==wt
chr3	69987109	69987299	chr3:69987109-69987299@@MITF_1==wt
chr3	69987129	69987319	chr3:69987129-69987319@@MITF_1==wt
chr3	69987149	69987339	chr3:69987149-69987339@@MITF_1==wt
chr3	69987169	69987359	chr3:69987169-69987359@@MITF_1==mut_cisbp_M5907_chr3
chr3	69987189	69987379	chr3:69987189-69987379@@MITF_1==mut_cisbp_M5907_chr3
chr3	69987209	69987399	chr3:69987209-69987399@@MITF_1==mut_cisbp_M5907_chr3
chr3	69987229	69987419	chr3:69987229-69987419@@MITF_1==mut_cisbp_M5907_chr3
chr3	69987249	69987439	chr3:69987249-69987439@@MITF_1==mut_cisbp_M5907_chr3
chr3	69987269	69987459	chr3:69987269-69987459@@MITF_1==mut_cisbp_M5907_chr3
chr3	69987289	69987479	chr3:69987289-69987479@@MITF_1==mut_cisbp_M5907_chr3
chr3	69987309	69987499	chr3:69987309-69987499@@MITF_1==mut_cisbp_M5907_chr3
chr3	69987329	69987519	chr3:69987329-69987519@@MITF_1==mut_cisbp_M5907_chr3
chr3	69987349	69987539	chr3:69987349-69987539@@MITF_1==mut_cisbp_M5907_chr3
chr3	69987369	69987559	chr3:69987369-69987559@@MITF_1==wt
chr3	69987389	69987579	chr3:69987389-69987579@@MITF_1==wt
chr3	69987409	69987599	chr3:69987409-69987599@@MITF_1==wt
chr3	69987429	69987619	chr3:69987429-69987619@@MITF_1==wt
chr3	69987449	69987639	chr3:69987449-69987639@@MITF_1==wt
chr3	69987469	69987659	chr3:69987469-69987659@@MITF_1==wt
chr3	69987489	69987679	chr3:69987489-69987679@@MITF_1==wt
chr3	69987509	69987699	chr3:69987509-69987699@@MITF_1==wt
chr3	69987529	69987719	chr3:69987529-69987719@@MITF_1==wt
chr3	69987549	69987739	chr3:69987549-69987739@@MITF_1==wt
chr3	69987569	69987759	chr3:69987569-69987759@@MITF_1==wt
chr3	69987589	69987779	chr3:69987589-69987779@@MITF_1==wt
chr3	69987609	69987799	chr3:69987609-69987799@@MITF_1==wt
chr3	124703732	124703922	chr3:124703732-124703922@@HEG1_1==mut_cisbp_M5907_chr3
chr3	124703752	124703942	chr3:124703752-124703942@@HEG1_1==mut_cisbp_M5907_chr3
chr3	124703772	124703962	chr3:124703772-124703962@@HEG1_1==mut_cisbp_M5907_chr3
chr3	124703792	124703982	chr3:124703792-124703982@@HEG1_1==mut_cisbp_M5907_chr3
chr3	124703812	124704002	chr3:124703812-124704002@@HEG1_1==mut_cisbp_M5907_chr3
chr3	124703832	124704022	chr3:124703832-124704022@@HEG1_1==wt
chr3	124703852	124704042	chr3:124703852-124704042@@HEG1_1==wt
chr3	124703872	124704062	chr3:124703872-124704062@@HEG1_1==wt
chr3	124703892	124704082	chr3:124703892-124704082@@HEG1_1==wt
chr3	124703912	124704102	chr3:124703912-124704102@@HEG1_1==wt
chr3	124703932	124704122	chr3:124703932-124704122@@HEG1_1==wt
chr3	124703952	124704142	chr3:124703952-124704142@@HEG1_1==wt
chr3	124703972	124704162	chr3:124703972-124704162@@HEG1_1==wt
chr3	124703992	124704182	chr3:124703992-124704182@@HEG1_1==wt
chr3	124704012	124704202	chr3:124704012-124704202@@HEG1_1==wt
chr3	124704032	124704222	chr3:124704032-124704222@@HEG1_1==wt
chr3	124704052	124704242	chr3:124704052-124704242@@HEG1_1==wt
chr3	124704072	124704262	chr3:124704072-124704262@@HEG1_1==wt
chr3	124704092	124704282	chr3:124704092-124704282@@HEG1_1==wt
chr3	124704112	124704302	chr3:124704112-124704302@@HEG1_1==wt
chr3	124704132	124704322	chr3:124704132-124704322@@HEG1_1==wt
chr3	124704152	124704342	chr3:124704152-124704342@@HEG1_1==wt
chr3	124704172	124704362	chr3:124704172-124704362@@HEG1_1==wt
chr3	124704192	124704382	chr3:124704192-124704382@@HEG1_1==wt
chr3	124704212	124704402	chr3:124704212-124704402@@HEG1_1==wt
chr3	124704232	124704422	chr3:124704232-124704422@@HEG1_1==mut_cisbp_M5907_chr3
chr3	124704252	124704442	chr3:124704252-124704442@@HEG1_1==mut_cisbp_M5907_chr3
chr3	124704272	124704462	chr3:124704272-124704462@@HEG1_1==mut_cisbp_M5907_chr3
chr3	124704292	124704482	chr3:124704292-124704482@@HEG1_1==mut_cisbp_M5907_chr3
chr3	124704312	124704502	chr3:124704312-124704502@@HEG1_1==mut_cisbp_M5907_chr3
chr3	124704332	124704522	chr3:124704332-124704522@@HEG1_1==mut_cisbp_M5907_chr3
chr3	124704352	124704542	chr3:124704352-124704542@@HEG1_1==mut_cisbp_M5907_chr3
chr3	124704372	124704562	chr3:124704372-124704562@@HEG1_1==mut_cisbp_M5907_chr3
chr3	124704392	124704582	chr3:124704392-124704582@@HEG1_1==mut_cisbp_M5907_chr3
chr3	124704412	124704602	chr3:124704412-124704602@@HEG1_1==wt
chr3	124704432	124704622	chr3:124704432-124704622@@HEG1_1==wt
chr3	124704452	124704642	chr3:124704452-124704642@@HEG1_1==wt
chr3	124704472	124704662	chr3:124704472-124704662@@HEG1_1==wt
chr3	124704492	124704682	chr3:124704492-124704682@@HEG1_1==wt
chr3	124704512	124704702	chr3:124704512-124704702@@HEG1_1==wt
chr3	124704532	124704722	chr3:124704532-124704722@@HEG1_1==wt
chr3	124704552	124704742	chr3:124704552-124704742@@HEG1_1==wt
chr3	124704572	124704762	chr3:124704572-124704762@@HEG1_1==wt
chr3	124704592	124704782	chr3:124704592-124704782@@HEG1_1==wt
chr3	124704612	124704802	chr3:124704612-124704802@@HEG1_1==wt
chr3	124704632	124704822	chr3:124704632-124704822@@HEG1_1==wt
chr3	124704652	124704842	chr3:124704652-124704842@@HEG1_1==wt
chr3	124704672	124704862	chr3:124704672-124704862@@HEG1_1==wt
chr3	124704692	124704882	chr3:124704692-124704882@@HEG1_1==wt
chr3	124704712	124704902	chr3:124704712-124704902@@HEG1_1==wt
chr3	124704732	124704922	chr3:124704732-124704922@@HEG1_1==wt
chr3	124704752	124704942	chr3:124704752-124704942@@HEG1_1==wt
chr3	124704772	124704962	chr3:124704772-124704962@@HEG1_1==wt
chr3	124704792	124704982	chr3:124704792-124704982@@HEG1_1==wt
chr3	124704812	124705002	chr3:124704812-124705002@@HEG1_1==wt
chr3	124704832	124705022	chr3:124704832-124705022@@HEG1_1==wt
chr3	124704852	124705042	chr3:124704852-124705042@@HEG1_1==wt
chr3	124704872	124705062	chr3:124704872-124705062@@HEG1_1==wt
chr3	124704892	124705082	chr3:124704892-124705082@@HEG1_1==wt
chr3	124704912	124705102	chr3:124704912-124705102@@HEG1_1==wt
chr3	124704932	124705122	chr3:124704932-124705122@@HEG1_1==wt
chr3	124704952	124705142	chr3:124704952-124705142@@HEG1_1==wt
chr3	124704972	124705162	chr3:124704972-124705162@@HEG1_1==wt
chr3	124704992	124705182	chr3:124704992-124705182@@HEG1_1==wt
chr3	124705012	124705202	chr3:124705012-124705202@@HEG1_1==wt
chr3	124705032	124705222	chr3:124705032-124705222@@HEG1_1==wt
chr3	124705052	124705242	chr3:124705052-124705242@@HEG1_1==wt
chr3	124705072	124705262	chr3:124705072-124705262@@HEG1_1==wt
chr3	124705092	124705282	chr3:124705092-124705282@@HEG1_1==wt
chr3	124705112	124705302	chr3:124705112-124705302@@HEG1_1==wt
chr3	124705132	124705322	chr3:124705132-124705322@@HEG1_1==wt
chr3	124705152	124705342	chr3:124705152-124705342@@HEG1_1==wt
chr3	124705172	124705362	chr3:124705172-124705362@@HEG1_1==wt
chr3	124705192	124705382	chr3:124705192-124705382@@HEG1_1==wt
chr3	124705212	124705402	chr3:124705212-124705402@@HEG1_1==wt
chr3	124705232	124705422	chr3:124705232-124705422@@HEG1_1==wt
chr3	124705252	124705442	chr3:124705252-124705442@@HEG1_1==wt
chr3	124705272	124705462	chr3:124705272-124705462@@HEG1_1==wt
chr3	124705292	124705482	chr3:124705292-124705482@@HEG1_1==wt
chr3	124705312	124705502	chr3:124705312-124705502@@HEG1_1==wt
chr3	124705332	124705522	chr3:124705332-124705522@@HEG1_1==wt
chr3	124705352	124705542	chr3:124705352-124705542@@HEG1_1==wt
chr3	124705372	124705562	chr3:124705372-124705562@@HEG1_1==wt
chr3	124705392	124705582	chr3:124705392-124705582@@HEG1_1==wt
chr3	124705412	124705602	chr3:124705412-124705602@@HEG1_1==wt
chr3	124705432	124705622	chr3:124705432-124705622@@HEG1_1==wt
chr3	124705452	124705642	chr3:124705452-124705642@@HEG1_1==wt
chr3	124705472	124705662	chr3:124705472-124705662@@HEG1_1==wt
chr3	124705492	124705682	chr3:124705492-124705682@@HEG1_1==wt
chr3	124705512	124705702	chr3:124705512-124705702@@HEG1_1==wt
chr3	124705532	124705722	chr3:124705532-124705722@@HEG1_1==wt
chr3	124705552	124705742	chr3:124705552-124705742@@HEG1_1==wt
chr3	124705572	124705762	chr3:124705572-124705762@@HEG1_1==wt
chr3	124705592	124705782	chr3:124705592-124705782@@HEG1_1==wt
chr3	124705612	124705802	chr3:124705612-124705802@@HEG1_1==wt
chr3	124705632	124705822	chr3:124705632-124705822@@HEG1_1==wt
chr3	124705652	124705842	chr3:124705652-124705842@@HEG1_1==wt
chr3	124705672	124705862	chr3:124705672-124705862@@HEG1_1==wt
chr4	55708276	55708466	chr4:55708276-55708466@@KIT_1==wt
chr4	55708296	55708486	chr4:55708296-55708486@@KIT_1==wt
chr4	55708316	55708506	chr4:55708316-55708506@@KIT_1==wt
chr4	55708336	55708526	chr4:55708336-55708526@@KIT_1==wt
chr4	55708356	55708546	chr4:55708356-55708546@@KIT_1==wt
chr4	55708376	55708566	chr4:55708376-55708566@@KIT_1==wt
chr4	55708396	55708586	chr4:55708396-55708586@@KIT_1==wt
chr4	55708416	55708606	chr4:55708416-55708606@@KIT_1==wt
chr4	55708436	55708626	chr4:55708436-55708626@@KIT_1==wt
chr4	55708456	55708646	chr4:55708456-55708646@@KIT_1==wt
chr4	55708476	55708666	chr4:55708476-55708666@@KIT_1==wt
chr4	55708496	55708686	chr4:55708496-55708686@@KIT_1==wt
chr4	55708516	55708706	chr4:55708516-55708706@@KIT_1==wt
chr4	55708536	55708726	chr4:55708536-55708726@@KIT_1==wt
chr4	55708556	55708746	chr4:55708556-55708746@@KIT_1==wt
chr4	55708576	55708766	chr4:55708576-55708766@@KIT_1==wt
chr4	55708596	55708786	chr4:55708596-55708786@@KIT_1==wt
chr4	55708616	55708806	chr4:55708616-55708806@@KIT_1==wt
chr4	55708636	55708826	chr4:55708636-55708826@@KIT_1==wt
chr4	55708656	55708846	chr4:55708656-55708846@@KIT_1==wt
chr4	55708676	55708866	chr4:55708676-55708866@@KIT_1==wt
chr4	55708696	55708886	chr4:55708696-55708886@@KIT_1==wt
chr4	55708716	55708906	chr4:55708716-55708906@@KIT_1==wt
chr4	55708736	55708926	chr4:55708736-55708926@@KIT_1==wt
chr4	55708756	55708946	chr4:55708756-55708946@@KIT_1==wt
chr4	55708776	55708966	chr4:55708776-55708966@@KIT_1==wt
chr4	55708796	55708986	chr4:55708796-55708986@@KIT_1==wt
chr4	55708816	55709006	chr4:55708816-55709006@@KIT_1==wt
chr4	55708836	55709026	chr4:55708836-55709026@@KIT_1==wt
chr4	55708856	55709046	chr4:55708856-55709046@@KIT_1==wt
chr4	55708876	55709066	chr4:55708876-55709066@@KIT_1==wt
chr4	55708896	55709086	chr4:55708896-55709086@@KIT_1==wt
chr4	55708916	55709106	chr4:55708916-55709106@@KIT_1==wt
chr4	55708936	55709126	chr4:55708936-55709126@@KIT_1==wt
chr4	55708956	55709146	chr4:55708956-55709146@@KIT_1==wt
chr4	55708976	55709166	chr4:55708976-55709166@@KIT_1==wt
chr4	55708996	55709186	chr4:55708996-55709186@@KIT_1==wt
chr4	55709016	55709206	chr4:55709016-55709206@@KIT_1==wt
chr4	55709036	55709226	chr4:55709036-55709226@@KIT_1==wt
chr4	55709056	55709246	chr4:55709056-55709246@@KIT_1==wt
chr4	55709076	55709266	chr4:55709076-55709266@@KIT_1==wt
chr4	55709096	55709286	chr4:55709096-55709286@@KIT_1==wt
chr4	55709116	55709306	chr4:55709116-55709306@@KIT_1==wt
chr4	55709136	55709326	chr4:55709136-55709326@@KIT_1==wt
chr4	55709156	55709346	chr4:55709156-55709346@@KIT_1==wt
chr4	55709176	55709366	chr4:55709176-55709366@@KIT_1==wt
chr4	55709196	55709386	chr4:55709196-55709386@@KIT_1==wt
chr4	55709216	55709406	chr4:55709216-55709406@@KIT_1==wt
chr4	55709236	55709426	chr4:55709236-55709426@@KIT_1==wt
chr4	55709256	55709446	chr4:55709256-55709446@@KIT_1==wt
chr4	55709276	55709466	chr4:55709276-55709466@@KIT_1==wt
chr4	55709296	55709486	chr4:55709296-55709486@@KIT_1==wt
chr4	55709316	55709506	chr4:55709316-55709506@@KIT_1==wt
chr4	55709336	55709526	chr4:55709336-55709526@@KIT_1==wt
chr4	55709356	55709546	chr4:55709356-55709546@@KIT_1==wt
chr4	55709376	55709566	chr4:55709376-55709566@@KIT_1==wt
chr4	55709396	55709586	chr4:55709396-55709586@@KIT_1==wt
chr4	55709416	55709606	chr4:55709416-55709606@@KIT_1==wt
chr4	55709436	55709626	chr4:55709436-55709626@@KIT_1==wt
chr4	55709456	55709646	chr4:55709456-55709646@@KIT_1==wt
chr4	55709476	55709666	chr4:55709476-55709666@@KIT_1==wt
chr4	55709496	55709686	chr4:55709496-55709686@@KIT_1==wt
chr4	55709516	55709706	chr4:55709516-55709706@@KIT_1==wt
chr4	55709536	55709726	chr4:55709536-55709726@@KIT_1==wt
chr4	55709556	55709746	chr4:55709556-55709746@@KIT_1==wt
chr4	55709576	55709766	chr4:55709576-55709766@@KIT_1==wt
chr4	55709596	55709786	chr4:55709596-55709786@@KIT_1==wt
chr4	55709616	55709806	chr4:55709616-55709806@@KIT_1==wt
chr4	55709636	55709826	chr4:55709636-55709826@@KIT_1==wt
chr4	55709656	55709846	chr4:55709656-55709846@@KIT_1==wt
chr4	55709676	55709866	chr4:55709676-55709866@@KIT_1==wt
chr4	55709696	55709886	chr4:55709696-55709886@@KIT_1==wt
chr4	55709716	55709906	chr4:55709716-55709906@@KIT_1==wt
chr4	55709736	55709926	chr4:55709736-55709926@@KIT_1==wt
chr4	55709756	55709946	chr4:55709756-55709946@@KIT_1==wt
chr4	55709776	55709966	chr4:55709776-55709966@@KIT_1==wt
chr4	55709796	55709986	chr4:55709796-55709986@@KIT_1==wt
chr4	55709816	55710006	chr4:55709816-55710006@@KIT_1==wt
chr4	55709836	55710026	chr4:55709836-55710026@@KIT_1==wt
chr4	123684507	123684697	chr4:123684507-123684697@@FGF2_1==wt
chr4	123684527	123684717	chr4:123684527-123684717@@FGF2_1==wt
chr4	123684547	123684737	chr4:123684547-123684737@@FGF2_1==wt
chr4	123684567	123684757	chr4:123684567-123684757@@FGF2_1==wt
chr4	123684587	123684777	chr4:123684587-123684777@@FGF2_1==wt
chr4	123684607	123684797	chr4:123684607-123684797@@FGF2_1==wt
chr4	123684627	123684817	chr4:123684627-123684817@@FGF2_1==wt
chr4	123684647	123684837	chr4:123684647-123684837@@FGF2_1==wt
chr4	123684667	123684857	chr4:123684667-123684857@@FGF2_1==wt
chr4	123684687	123684877	chr4:123684687-123684877@@FGF2_1==wt
chr4	123684707	123684897	chr4:123684707-123684897@@FGF2_1==wt
chr4	123684727	123684917	chr4:123684727-123684917@@FGF2_1==wt
chr4	123684747	123684937	chr4:123684747-123684937@@FGF2_1==wt
chr4	123684767	123684957	chr4:123684767-123684957@@FGF2_1==wt
chr4	123684787	123684977	chr4:123684787-123684977@@FGF2_1==wt
chr4	123684807	123684997	chr4:123684807-123684997@@FGF2_1==wt
chr4	123684827	123685017	chr4:123684827-123685017@@FGF2_1==wt
chr4	123684847	123685037	chr4:123684847-123685037@@FGF2_1==wt
chr4	123684867	123685057	chr4:123684867-123685057@@FGF2_1==wt
chr4	123684887	123685077	chr4:123684887-123685077@@FGF2_1==wt
chr4	123684907	123685097	chr4:123684907-123685097@@FGF2_1==wt
chr4	123684927	123685117	chr4:123684927-123685117@@FGF2_1==wt
chr4	123684947	123685137	chr4:123684947-123685137@@FGF2_1==wt
chr4	123684967	123685157	chr4:123684967-123685157@@FGF2_1==wt
chr4	123684987	123685177	chr4:123684987-123685177@@FGF2_1==wt
chr4	123685007	123685197	chr4:123685007-123685197@@FGF2_1==wt
chr4	123685027	123685217	chr4:123685027-123685217@@FGF2_1==wt
chr4	123685047	123685237	chr4:123685047-123685237@@FGF2_1==wt
chr4	123685067	123685257	chr4:123685067-123685257@@FGF2_1==wt
chr4	123685087	123685277	chr4:123685087-123685277@@FGF2_1==wt
chr4	123685107	123685297	chr4:123685107-123685297@@FGF2_1==wt
chr4	123685127	123685317	chr4:123685127-123685317@@FGF2_1==wt
chr4	123685147	123685337	chr4:123685147-123685337@@FGF2_1==wt
chr4	123685167	123685357	chr4:123685167-123685357@@FGF2_1==wt
chr4	123685187	123685377	chr4:123685187-123685377@@FGF2_1==wt
chr4	123685207	123685397	chr4:123685207-123685397@@FGF2_1==wt
chr4	123685227	123685417	chr4:123685227-123685417@@FGF2_1==wt
chr4	123685247	123685437	chr4:123685247-123685437@@FGF2_1==wt
chr4	123685267	123685457	chr4:123685267-123685457@@FGF2_1==wt
chr4	123685287	123685477	chr4:123685287-123685477@@FGF2_1==wt
chr4	123685307	123685497	chr4:123685307-123685497@@FGF2_1==wt
chr4	123685327	123685517	chr4:123685327-123685517@@FGF2_1==wt
chr4	123685347	123685537	chr4:123685347-123685537@@FGF2_1==wt
chr4	123685367	123685557	chr4:123685367-123685557@@FGF2_1==wt
chr4	123685387	123685577	chr4:123685387-123685577@@FGF2_1==wt
chr4	123685407	123685597	chr4:123685407-123685597@@FGF2_1==wt
chr4	123685427	123685617	chr4:123685427-123685617@@FGF2_1==wt
chr4	123685447	123685637	chr4:123685447-123685637@@FGF2_1==wt
chr4	123685467	123685657	chr4:123685467-123685657@@FGF2_1==wt
chr4	123685487	123685677	chr4:123685487-123685677@@FGF2_1==wt
chr4	123685507	123685697	chr4:123685507-123685697@@FGF2_1==wt
chr4	123685527	123685717	chr4:123685527-123685717@@FGF2_1==wt
chr4	123685547	123685737	chr4:123685547-123685737@@FGF2_1==wt
chr4	123685567	123685757	chr4:123685567-123685757@@FGF2_1==wt
chr4	123685587	123685777	chr4:123685587-123685777@@FGF2_1==wt
chr4	123685607	123685797	chr4:123685607-123685797@@FGF2_1==wt
chr4	123685627	123685817	chr4:123685627-123685817@@FGF2_1==wt
chr4	123685647	123685837	chr4:123685647-123685837@@FGF2_1==wt
chr4	123685667	123685857	chr4:123685667-123685857@@FGF2_1==wt
chr4	123685687	123685877	chr4:123685687-123685877@@FGF2_1==wt
chr4	123685707	123685897	chr4:123685707-123685897@@FGF2_1==wt
chr4	123685727	123685917	chr4:123685727-123685917@@FGF2_1==wt
chr4	123685747	123685937	chr4:123685747-123685937@@FGF2_1==wt
chr4	123685767	123685957	chr4:123685767-123685957@@FGF2_1==wt
chr4	123685787	123685977	chr4:123685787-123685977@@FGF2_1==wt
chr4	123685807	123685997	chr4:123685807-123685997@@FGF2_1==wt
chr4	123685827	123686017	chr4:123685827-123686017@@FGF2_1==wt
chr4	123685847	123686037	chr4:123685847-123686037@@FGF2_1==wt
chr4	123685867	123686057	chr4:123685867-123686057@@FGF2_1==wt
chr4	123685887	123686077	chr4:123685887-123686077@@FGF2_1==wt
chr4	123685907	123686097	chr4:123685907-123686097@@FGF2_1==wt
chr4	123685927	123686117	chr4:123685927-123686117@@FGF2_1==wt
chr4	123685947	123686137	chr4:123685947-123686137@@FGF2_1==wt
chr4	123685967	123686157	chr4:123685967-123686157@@FGF2_1==wt
chr4	123685987	123686177	chr4:123685987-123686177@@FGF2_1==wt
chr4	123686007	123686197	chr4:123686007-123686197@@FGF2_1==wt
chr4	123686027	123686217	chr4:123686027-123686217@@FGF2_1==wt
chr4	123686047	123686237	chr4:123686047-123686237@@FGF2_1==wt
chr4	123686067	123686257	chr4:123686067-123686257@@FGF2_1==wt
chr4	123686087	123686277	chr4:123686087-123686277@@FGF2_1==wt
chr4	123686107	123686297	chr4:123686107-123686297@@FGF2_1==wt
chr4	123686127	123686317	chr4:123686127-123686317@@FGF2_1==wt
chr4	123686147	123686337	chr4:123686147-123686337@@FGF2_1==wt
chr4	123686167	123686357	chr4:123686167-123686357@@FGF2_1==wt
chr4	123686187	123686377	chr4:123686187-123686377@@FGF2_1==wt
chr4	123686207	123686397	chr4:123686207-123686397@@FGF2_1==wt
chr4	123686227	123686417	chr4:123686227-123686417@@FGF2_1==wt
chr4	123686247	123686437	chr4:123686247-123686437@@FGF2_1==wt
chr4	123686267	123686457	chr4:123686267-123686457@@FGF2_1==wt
chr4	123686287	123686477	chr4:123686287-123686477@@FGF2_1==wt
chr4	123686307	123686497	chr4:123686307-123686497@@FGF2_1==wt
chr4	123686327	123686517	chr4:123686327-123686517@@FGF2_1==wt
chr4	123686347	123686537	chr4:123686347-123686537@@FGF2_1==wt
chr4	123686367	123686557	chr4:123686367-123686557@@FGF2_1==wt
chr4	123686387	123686577	chr4:123686387-123686577@@FGF2_1==wt
chr4	123686407	123686597	chr4:123686407-123686597@@FGF2_1==wt
chr4	123686427	123686617	chr4:123686427-123686617@@FGF2_1==wt
chr4	123686447	123686637	chr4:123686447-123686637@@FGF2_1==wt
chr4	123686467	123686657	chr4:123686467-123686657@@FGF2_1==wt
chr4	123686487	123686677	chr4:123686487-123686677@@FGF2_1==wt
chr4	123686507	123686697	chr4:123686507-123686697@@FGF2_1==wt
chr4	123686527	123686717	chr4:123686527-123686717@@FGF2_1==wt
chr4	123686547	123686737	chr4:123686547-123686737@@FGF2_1==wt
chr4	123686567	123686757	chr4:123686567-123686757@@FGF2_1==wt
chr4	123686587	123686777	chr4:123686587-123686777@@FGF2_1==wt
chr4	123686607	123686797	chr4:123686607-123686797@@FGF2_1==wt
chr4	123686627	123686817	chr4:123686627-123686817@@FGF2_1==wt
chr4	123686647	123686837	chr4:123686647-123686837@@FGF2_1==wt
chr4	123686667	123686857	chr4:123686667-123686857@@FGF2_1==wt
chr4	123686687	123686877	chr4:123686687-123686877@@FGF2_1==wt
chr4	123686707	123686897	chr4:123686707-123686897@@FGF2_1==wt
chr4	123686727	123686917	chr4:123686727-123686917@@FGF2_1==wt
chr4	123686747	123686937	chr4:123686747-123686937@@FGF2_1==wt
chr4	123686767	123686957	chr4:123686767-123686957@@FGF2_1==wt
chr4	123686787	123686977	chr4:123686787-123686977@@FGF2_1==wt
chr4	123686807	123686997	chr4:123686807-123686997@@FGF2_1==wt
chr4	123686827	123687017	chr4:123686827-123687017@@FGF2_1==wt
chr4	123686847	123687037	chr4:123686847-123687037@@FGF2_1==wt
chr4	123686867	123687057	chr4:123686867-123687057@@FGF2_1==wt
chr4	123703115	123703305	chr4:123703115-123703305@@FGF2_2==wt
chr4	123703135	123703325	chr4:123703135-123703325@@FGF2_2==wt
chr4	123703155	123703345	chr4:123703155-123703345@@FGF2_2==wt
chr4	123703175	123703365	chr4:123703175-123703365@@FGF2_2==wt
chr4	123703195	123703385	chr4:123703195-123703385@@FGF2_2==wt
chr4	123703215	123703405	chr4:123703215-123703405@@FGF2_2==wt
chr4	123703235	123703425	chr4:123703235-123703425@@FGF2_2==wt
chr4	123703255	123703445	chr4:123703255-123703445@@FGF2_2==wt
chr4	123703275	123703465	chr4:123703275-123703465@@FGF2_2==wt
chr4	123703295	123703485	chr4:123703295-123703485@@FGF2_2==wt
chr4	123703315	123703505	chr4:123703315-123703505@@FGF2_2==wt
chr4	123703335	123703525	chr4:123703335-123703525@@FGF2_2==wt
chr4	123703355	123703545	chr4:123703355-123703545@@FGF2_2==wt
chr4	123703375	123703565	chr4:123703375-123703565@@FGF2_2==wt
chr4	123703395	123703585	chr4:123703395-123703585@@FGF2_2==mut_cisbp_M5907_chr4
chr4	123703415	123703605	chr4:123703415-123703605@@FGF2_2==mut_cisbp_M5907_chr4
chr4	123703435	123703625	chr4:123703435-123703625@@FGF2_2==mut_cisbp_M5907_chr4
chr4	123703455	123703645	chr4:123703455-123703645@@FGF2_2==mut_cisbp_M5907_chr4
chr4	123703475	123703665	chr4:123703475-123703665@@FGF2_2==mut_cisbp_M5907_chr4
chr4	123703495	123703685	chr4:123703495-123703685@@FGF2_2==mut_cisbp_M5907_chr4
chr4	123703515	123703705	chr4:123703515-123703705@@FGF2_2==mut_cisbp_M5907_chr4
chr4	123703535	123703725	chr4:123703535-123703725@@FGF2_2==mut_cisbp_M5907_chr4
chr4	123703555	123703745	chr4:123703555-123703745@@FGF2_2==mut_cisbp_M5907_chr4
chr4	123703575	123703765	chr4:123703575-123703765@@FGF2_2==mut_cisbp_M5907_chr4
chr4	123703595	123703785	chr4:123703595-123703785@@FGF2_2==wt
chr4	123703615	123703805	chr4:123703615-123703805@@FGF2_2==wt
chr4	123703635	123703825	chr4:123703635-123703825@@FGF2_2==wt
chr4	123703655	123703845	chr4:123703655-123703845@@FGF2_2==wt
chr4	123703675	123703865	chr4:123703675-123703865@@FGF2_2==wt
chr4	123703695	123703885	chr4:123703695-123703885@@FGF2_2==wt
chr4	123703715	123703905	chr4:123703715-123703905@@FGF2_2==wt
chr4	123703735	123703925	chr4:123703735-123703925@@FGF2_2==wt
chr4	123703755	123703945	chr4:123703755-123703945@@FGF2_2==wt
chr4	123703775	123703965	chr4:123703775-123703965@@FGF2_2==wt
chr4	123703795	123703985	chr4:123703795-123703985@@FGF2_2==wt
chr4	123703815	123704005	chr4:123703815-123704005@@FGF2_2==wt
chr4	123703835	123704025	chr4:123703835-123704025@@FGF2_2==wt
chr4	123703855	123704045	chr4:123703855-123704045@@FGF2_2==wt
chr4	123703875	123704065	chr4:123703875-123704065@@FGF2_2==wt
chr4	123703895	123704085	chr4:123703895-123704085@@FGF2_2==wt
chr4	123703915	123704105	chr4:123703915-123704105@@FGF2_2==wt
chr4	123703935	123704125	chr4:123703935-123704125@@FGF2_2==wt
chr4	123703955	123704145	chr4:123703955-123704145@@FGF2_2==wt
chr4	123703975	123704165	chr4:123703975-123704165@@FGF2_2==wt
chr4	123703995	123704185	chr4:123703995-123704185@@FGF2_2==wt
chr4	123704015	123704205	chr4:123704015-123704205@@FGF2_2==wt
chr4	123704035	123704225	chr4:123704035-123704225@@FGF2_2==wt
chr4	123704055	123704245	chr4:123704055-123704245@@FGF2_2==wt
chr4	123704075	123704265	chr4:123704075-123704265@@FGF2_2==wt
chr4	123704095	123704285	chr4:123704095-123704285@@FGF2_2==wt
chr4	123704115	123704305	chr4:123704115-123704305@@FGF2_2==wt
chr4	123704135	123704325	chr4:123704135-123704325@@FGF2_2==wt
chr4	123704155	123704345	chr4:123704155-123704345@@FGF2_2==wt
chr4	123704175	123704365	chr4:123704175-123704365@@FGF2_2==wt
chr4	123704195	123704385	chr4:123704195-123704385@@FGF2_2==wt
chr4	123704215	123704405	chr4:123704215-123704405@@FGF2_2==wt
chr4	123704235	123704425	chr4:123704235-123704425@@FGF2_2==wt
chr4	123704255	123704445	chr4:123704255-123704445@@FGF2_2==wt
chr4	123704275	123704465	chr4:123704275-123704465@@FGF2_2==wt
chr4	123704295	123704485	chr4:123704295-123704485@@FGF2_2==wt
chr4	123704315	123704505	chr4:123704315-123704505@@FGF2_2==wt
chr4	123704335	123704525	chr4:123704335-123704525@@FGF2_2==wt
chr4	123704355	123704545	chr4:123704355-123704545@@FGF2_2==wt
chr4	123704375	123704565	chr4:123704375-123704565@@FGF2_2==wt
chr4	123704395	123704585	chr4:123704395-123704585@@FGF2_2==mut_cisbp_M5907_chr4
chr4	123704415	123704605	chr4:123704415-123704605@@FGF2_2==mut_cisbp_M5907_chr4
chr4	123704435	123704625	chr4:123704435-123704625@@FGF2_2==mut_cisbp_M5907_chr4
chr4	123704455	123704645	chr4:123704455-123704645@@FGF2_2==mut_cisbp_M5907_chr4
chr4	123704475	123704665	chr4:123704475-123704665@@FGF2_2==mut_cisbp_M5907_chr4
chr4	123704495	123704685	chr4:123704495-123704685@@FGF2_2==mut_cisbp_M5907_chr4
chr4	123704515	123704705	chr4:123704515-123704705@@FGF2_2==mut_cisbp_M5907_chr4
chr4	123704535	123704725	chr4:123704535-123704725@@FGF2_2==mut_cisbp_M5907_chr4
chr4	123704555	123704745	chr4:123704555-123704745@@FGF2_2==mut_cisbp_M5907_chr4
chr4	123704575	123704765	chr4:123704575-123704765@@FGF2_2==mut_cisbp_M5907_chr4
chr4	123704595	123704785	chr4:123704595-123704785@@FGF2_2==wt
chr4	123704615	123704805	chr4:123704615-123704805@@FGF2_2==wt
chr4	123704635	123704825	chr4:123704635-123704825@@FGF2_2==wt
chr4	123704655	123704845	chr4:123704655-123704845@@FGF2_2==wt
chr4	123704675	123704865	chr4:123704675-123704865@@FGF2_2==wt
chr4	123704695	123704885	chr4:123704695-123704885@@FGF2_2==wt
chr4	123704715	123704905	chr4:123704715-123704905@@FGF2_2==wt
chr4	123704735	123704925	chr4:123704735-123704925@@FGF2_2==wt
chr4	123704755	123704945	chr4:123704755-123704945@@FGF2_2==wt
chr4	123704775	123704965	chr4:123704775-123704965@@FGF2_2==wt
chr4	123704795	123704985	chr4:123704795-123704985@@FGF2_2==wt
chr4	123704815	123705005	chr4:123704815-123705005@@FGF2_2==wt
chr4	123704835	123705025	chr4:123704835-123705025@@FGF2_2==wt
chr4	123704855	123705045	chr4:123704855-123705045@@FGF2_2==wt
chr4	123704875	123705065	chr4:123704875-123705065@@FGF2_2==wt
chr4	123704895	123705085	chr4:123704895-123705085@@FGF2_2==wt
chr4	123704915	123705105	chr4:123704915-123705105@@FGF2_2==wt
chr4	123704935	123705125	chr4:123704935-123705125@@FGF2_2==wt
chr4	123704955	123705145	chr4:123704955-123705145@@FGF2_2==wt
chr4	123704975	123705165	chr4:123704975-123705165@@FGF2_2==wt
chr4	123704995	123705185	chr4:123704995-123705185@@FGF2_2==wt
chr4	123705015	123705205	chr4:123705015-123705205@@FGF2_2==wt
chr4	123705035	123705225	chr4:123705035-123705225@@FGF2_2==wt
chr4	123705055	123705245	chr4:123705055-123705245@@FGF2_2==wt
chr4	123705075	123705265	chr4:123705075-123705265@@FGF2_2==wt
chr4	123705095	123705285	chr4:123705095-123705285@@FGF2_2==wt
chr4	123705115	123705305	chr4:123705115-123705305@@FGF2_2==wt
chr4	123705135	123705325	chr4:123705135-123705325@@FGF2_2==wt
chr4	123705155	123705345	chr4:123705155-123705345@@FGF2_2==wt
chr4	123705175	123705365	chr4:123705175-123705365@@FGF2_2==wt
chr4	123705195	123705385	chr4:123705195-123705385@@FGF2_2==wt
chr4	123705215	123705405	chr4:123705215-123705405@@FGF2_2==wt
chr4	123705235	123705425	chr4:123705235-123705425@@FGF2_2==wt
chr4	123705255	123705445	chr4:123705255-123705445@@FGF2_2==wt
chr4	123705275	123705465	chr4:123705275-123705465@@FGF2_2==wt
chr4	123705295	123705485	chr4:123705295-123705485@@FGF2_2==wt
chr4	123705315	123705505	chr4:123705315-123705505@@FGF2_2==wt
chr4	123705335	123705525	chr4:123705335-123705525@@FGF2_2==wt
chr4	123705355	123705545	chr4:123705355-123705545@@FGF2_2==wt
chr4	123705375	123705565	chr4:123705375-123705565@@FGF2_2==wt
chr4	123705395	123705585	chr4:123705395-123705585@@FGF2_2==wt
chr4	123705415	123705605	chr4:123705415-123705605@@FGF2_2==wt
chr4	123705435	123705625	chr4:123705435-123705625@@FGF2_2==wt
chr4	123705455	123705645	chr4:123705455-123705645@@FGF2_2==wt
chr5	155902523	155902713	chr5:155902523-155902713@@SGCD_2==wt
chr5	155902543	155902733	chr5:155902543-155902733@@SGCD_2==wt
chr5	155902563	155902753	chr5:155902563-155902753@@SGCD_2==wt
chr5	155902583	155902773	chr5:155902583-155902773@@SGCD_2==wt
chr5	155902603	155902793	chr5:155902603-155902793@@SGCD_2==wt
chr5	155902623	155902813	chr5:155902623-155902813@@SGCD_2==wt
chr5	155902643	155902833	chr5:155902643-155902833@@SGCD_2==wt
chr5	155902663	155902853	chr5:155902663-155902853@@SGCD_2==wt
chr5	155902683	155902873	chr5:155902683-155902873@@SGCD_2==wt
chr5	155902703	155902893	chr5:155902703-155902893@@SGCD_2==wt
chr5	155902723	155902913	chr5:155902723-155902913@@SGCD_2==wt
chr5	155902743	155902933	chr5:155902743-155902933@@SGCD_2==mut_cisbp_M5907_chr5
chr5	155902763	155902953	chr5:155902763-155902953@@SGCD_2==mut_cisbp_M5907_chr5
chr5	155902783	155902973	chr5:155902783-155902973@@SGCD_2==mut_cisbp_M5907_chr5
chr5	155902803	155902993	chr5:155902803-155902993@@SGCD_2==mut_cisbp_M5907_chr5
chr5	155902823	155903013	chr5:155902823-155903013@@SGCD_2==mut_cisbp_M5907_chr5
chr5	155902843	155903033	chr5:155902843-155903033@@SGCD_2==mut_cisbp_M5907_chr5
chr5	155902863	155903053	chr5:155902863-155903053@@SGCD_2==mut_cisbp_M5907_chr5
chr5	155902883	155903073	chr5:155902883-155903073@@SGCD_2==mut_cisbp_M5907_chr5
chr5	155902903	155903093	chr5:155902903-155903093@@SGCD_2==mut_cisbp_M5907_chr5
chr5	155902923	155903113	chr5:155902923-155903113@@SGCD_2==mut_cisbp_M5907_chr5
chr5	155902943	155903133	chr5:155902943-155903133@@SGCD_2==wt
chr5	155902963	155903153	chr5:155902963-155903153@@SGCD_2==wt
chr5	155902983	155903173	chr5:155902983-155903173@@SGCD_2==wt
chr5	155903003	155903193	chr5:155903003-155903193@@SGCD_2==wt
chr5	155903023	155903213	chr5:155903023-155903213@@SGCD_2==wt
chr5	155903043	155903233	chr5:155903043-155903233@@SGCD_2==wt
chr5	155903063	155903253	chr5:155903063-155903253@@SGCD_2==wt
chr5	155903083	155903273	chr5:155903083-155903273@@SGCD_2==wt
chr5	155903103	155903293	chr5:155903103-155903293@@SGCD_2==wt
chr5	155903123	155903313	chr5:155903123-155903313@@SGCD_2==wt
chr5	155903143	155903333	chr5:155903143-155903333@@SGCD_2==wt
chr5	155903163	155903353	chr5:155903163-155903353@@SGCD_2==mut_cisbp_M5907_chr5
chr5	155903183	155903373	chr5:155903183-155903373@@SGCD_2==mut_cisbp_M5907_chr5
chr5	155903203	155903393	chr5:155903203-155903393@@SGCD_2==mut_cisbp_M5907_chr5
chr5	155903223	155903413	chr5:155903223-155903413@@SGCD_2==mut_cisbp_M5907_chr5
chr5	155903243	155903433	chr5:155903243-155903433@@SGCD_2==mut_cisbp_M5907_chr5
chr5	155903263	155903453	chr5:155903263-155903453@@SGCD_2==mut_cisbp_M5907_chr5
chr5	155903283	155903473	chr5:155903283-155903473@@SGCD_2==mut_cisbp_M5907_chr5
chr5	155903303	155903493	chr5:155903303-155903493@@SGCD_2==mut_cisbp_M5907_chr5
chr5	155903323	155903513	chr5:155903323-155903513@@SGCD_2==mut_cisbp_M5907_chr5
chr5	155903343	155903533	chr5:155903343-155903533@@SGCD_2==wt
chr5	155903363	155903553	chr5:155903363-155903553@@SGCD_2==wt
chr5	155903383	155903573	chr5:155903383-155903573@@SGCD_2==wt
chr5	155903403	155903593	chr5:155903403-155903593@@SGCD_2==wt
chr5	155903423	155903613	chr5:155903423-155903613@@SGCD_2==wt
chr5	155903443	155903633	chr5:155903443-155903633@@SGCD_2==wt
chr5	155903463	155903653	chr5:155903463-155903653@@SGCD_2==wt
chr5	155903483	155903673	chr5:155903483-155903673@@SGCD_2==wt
chr5	155903503	155903693	chr5:155903503-155903693@@SGCD_2==wt
chr5	155903523	155903713	chr5:155903523-155903713@@SGCD_2==wt
chr5	155903543	155903733	chr5:155903543-155903733@@SGCD_2==wt
chr5	155903563	155903753	chr5:155903563-155903753@@SGCD_2==wt
chr5	155903583	155903773	chr5:155903583-155903773@@SGCD_2==wt
chr5	155903603	155903793	chr5:155903603-155903793@@SGCD_2==wt
chr5	155903623	155903813	chr5:155903623-155903813@@SGCD_2==wt
chr5	155903643	155903833	chr5:155903643-155903833@@SGCD_2==wt
chr5	155903663	155903853	chr5:155903663-155903853@@SGCD_2==wt
chr5	155903683	155903873	chr5:155903683-155903873@@SGCD_2==wt
chr5	155903703	155903893	chr5:155903703-155903893@@SGCD_2==wt
chr5	155903723	155903913	chr5:155903723-155903913@@SGCD_2==wt
chr5	155903743	155903933	chr5:155903743-155903933@@SGCD_2==wt
chr5	155903763	155903953	chr5:155903763-155903953@@SGCD_2==wt
chr5	155903783	155903973	chr5:155903783-155903973@@SGCD_2==wt
chr5	155903803	155903993	chr5:155903803-155903993@@SGCD_2==wt
chr5	155903823	155904013	chr5:155903823-155904013@@SGCD_2==wt
chr5	155903843	155904033	chr5:155903843-155904033@@SGCD_2==wt
chr5	155903863	155904053	chr5:155903863-155904053@@SGCD_2==wt
chr5	155903883	155904073	chr5:155903883-155904073@@SGCD_2==wt
chr5	155903903	155904093	chr5:155903903-155904093@@SGCD_2==wt
chr5	155903923	155904113	chr5:155903923-155904113@@SGCD_2==wt
chr5	155903943	155904133	chr5:155903943-155904133@@SGCD_2==wt
chr5	155903963	155904153	chr5:155903963-155904153@@SGCD_2==wt
chr5	155903983	155904173	chr5:155903983-155904173@@SGCD_2==wt
chr5	155904003	155904193	chr5:155904003-155904193@@SGCD_2==wt
chr5	155904023	155904213	chr5:155904023-155904213@@SGCD_2==wt
chr5	155904043	155904233	chr5:155904043-155904233@@SGCD_2==wt
chr5	155904063	155904253	chr5:155904063-155904253@@SGCD_2==wt
chr5	155904083	155904273	chr5:155904083-155904273@@SGCD_2==wt
chr5	155904103	155904293	chr5:155904103-155904293@@SGCD_2==wt
chr5	155904123	155904313	chr5:155904123-155904313@@SGCD_2==wt
chr5	155904143	155904333	chr5:155904143-155904333@@SGCD_2==wt
chr5	155904163	155904353	chr5:155904163-155904353@@SGCD_2==wt
chr5	155904183	155904373	chr5:155904183-155904373@@SGCD_2==wt
chr5	155904203	155904393	chr5:155904203-155904393@@SGCD_2==wt
chr5	155904223	155904413	chr5:155904223-155904413@@SGCD_2==wt
chr5	155904243	155904433	chr5:155904243-155904433@@SGCD_2==wt
chr5	155904263	155904453	chr5:155904263-155904453@@SGCD_2==wt
chr5	155904283	155904473	chr5:155904283-155904473@@SGCD_2==wt
chr5	155904303	155904493	chr5:155904303-155904493@@SGCD_2==wt
chr5	155904323	155904513	chr5:155904323-155904513@@SGCD_2==wt
chr5	155904343	155904533	chr5:155904343-155904533@@SGCD_2==wt
chr5	155904363	155904553	chr5:155904363-155904553@@SGCD_2==wt
chr5	155904383	155904573	chr5:155904383-155904573@@SGCD_2==wt
chr5	155904403	155904593	chr5:155904403-155904593@@SGCD_2==wt
chr5	155904423	155904613	chr5:155904423-155904613@@SGCD_2==wt
chr5	155904443	155904633	chr5:155904443-155904633@@SGCD_2==wt
chr5	155904463	155904653	chr5:155904463-155904653@@SGCD_2==wt
chr5	155904483	155904673	chr5:155904483-155904673@@SGCD_2==wt
chr5	155904503	155904693	chr5:155904503-155904693@@SGCD_2==wt
chr5	155904523	155904713	chr5:155904523-155904713@@SGCD_2==wt
chr5	155904543	155904733	chr5:155904543-155904733@@SGCD_2==wt
chr5	156015794	156015984	chr5:156015794-156015984@@SGCD_3==wt
chr5	156015814	156016004	chr5:156015814-156016004@@SGCD_3==wt
chr5	156015834	156016024	chr5:156015834-156016024@@SGCD_3==wt
chr5	156015854	156016044	chr5:156015854-156016044@@SGCD_3==wt
chr5	156015874	156016064	chr5:156015874-156016064@@SGCD_3==wt
chr5	156015894	156016084	chr5:156015894-156016084@@SGCD_3==wt
chr5	156015914	156016104	chr5:156015914-156016104@@SGCD_3==wt
chr5	156015934	156016124	chr5:156015934-156016124@@SGCD_3==wt
chr5	156015954	156016144	chr5:156015954-156016144@@SGCD_3==wt
chr5	156015974	156016164	chr5:156015974-156016164@@SGCD_3==wt
chr5	156015994	156016184	chr5:156015994-156016184@@SGCD_3==wt
chr5	156016014	156016204	chr5:156016014-156016204@@SGCD_3==wt
chr5	156016034	156016224	chr5:156016034-156016224@@SGCD_3==wt
chr5	156016054	156016244	chr5:156016054-156016244@@SGCD_3==wt
chr5	156016074	156016264	chr5:156016074-156016264@@SGCD_3==wt
chr5	156016094	156016284	chr5:156016094-156016284@@SGCD_3==wt
chr5	156016114	156016304	chr5:156016114-156016304@@SGCD_3==wt
chr5	156016134	156016324	chr5:156016134-156016324@@SGCD_3==wt
chr5	156016154	156016344	chr5:156016154-156016344@@SGCD_3==wt
chr5	156016174	156016364	chr5:156016174-156016364@@SGCD_3==wt
chr5	156016194	156016384	chr5:156016194-156016384@@SGCD_3==wt
chr5	156016214	156016404	chr5:156016214-156016404@@SGCD_3==wt
chr5	156016234	156016424	chr5:156016234-156016424@@SGCD_3==wt
chr5	156016254	156016444	chr5:156016254-156016444@@SGCD_3==wt
chr5	156016274	156016464	chr5:156016274-156016464@@SGCD_3==wt
chr5	156016294	156016484	chr5:156016294-156016484@@SGCD_3==wt
chr5	156016314	156016504	chr5:156016314-156016504@@SGCD_3==wt
chr5	156016334	156016524	chr5:156016334-156016524@@SGCD_3==wt
chr5	156016354	156016544	chr5:156016354-156016544@@SGCD_3==wt
chr5	156016374	156016564	chr5:156016374-156016564@@SGCD_3==wt
chr5	156016394	156016584	chr5:156016394-156016584@@SGCD_3==wt
chr5	156016414	156016604	chr5:156016414-156016604@@SGCD_3==wt
chr5	156016434	156016624	chr5:156016434-156016624@@SGCD_3==wt
chr5	156016454	156016644	chr5:156016454-156016644@@SGCD_3==wt
chr5	156016474	156016664	chr5:156016474-156016664@@SGCD_3==wt
chr5	156016494	156016684	chr5:156016494-156016684@@SGCD_3==wt
chr5	156016514	156016704	chr5:156016514-156016704@@SGCD_3==wt
chr5	156016534	156016724	chr5:156016534-156016724@@SGCD_3==wt
chr5	156016554	156016744	chr5:156016554-156016744@@SGCD_3==wt
chr5	156016574	156016764	chr5:156016574-156016764@@SGCD_3==wt
chr5	156016594	156016784	chr5:156016594-156016784@@SGCD_3==wt
chr5	156016614	156016804	chr5:156016614-156016804@@SGCD_3==wt
chr5	156016634	156016824	chr5:156016634-156016824@@SGCD_3==wt
chr5	156016654	156016844	chr5:156016654-156016844@@SGCD_3==wt
chr5	156016674	156016864	chr5:156016674-156016864@@SGCD_3==wt
chr5	156016694	156016884	chr5:156016694-156016884@@SGCD_3==wt
chr5	156016714	156016904	chr5:156016714-156016904@@SGCD_3==wt
chr5	156016734	156016924	chr5:156016734-156016924@@SGCD_3==wt
chr5	156016754	156016944	chr5:156016754-156016944@@SGCD_3==wt
chr5	156016774	156016964	chr5:156016774-156016964@@SGCD_3==wt
chr5	156016794	156016984	chr5:156016794-156016984@@SGCD_3==wt
chr5	156016814	156017004	chr5:156016814-156017004@@SGCD_3==wt
chr5	156016834	156017024	chr5:156016834-156017024@@SGCD_3==wt
chr5	156016854	156017044	chr5:156016854-156017044@@SGCD_3==wt
chr5	156016874	156017064	chr5:156016874-156017064@@SGCD_3==wt
chr5	156016894	156017084	chr5:156016894-156017084@@SGCD_3==mut_cisbp_M5907_chr5
chr5	156016914	156017104	chr5:156016914-156017104@@SGCD_3==mut_cisbp_M5907_chr5
chr5	156016934	156017124	chr5:156016934-156017124@@SGCD_3==mut_cisbp_M5907_chr5
chr5	156016954	156017144	chr5:156016954-156017144@@SGCD_3==mut_cisbp_M5907_chr5
chr5	156016974	156017164	chr5:156016974-156017164@@SGCD_3==mut_cisbp_M5907_chr5
chr5	156016994	156017184	chr5:156016994-156017184@@SGCD_3==mut_cisbp_M5907_chr5
chr5	156017014	156017204	chr5:156017014-156017204@@SGCD_3==mut_cisbp_M5907_chr5
chr5	156017034	156017224	chr5:156017034-156017224@@SGCD_3==mut_cisbp_M5907_chr5
chr5	156017054	156017244	chr5:156017054-156017244@@SGCD_3==mut_cisbp_M5907_chr5
chr5	156017074	156017264	chr5:156017074-156017264@@SGCD_3==mut_cisbp_M5907_chr5
chr5	156017094	156017284	chr5:156017094-156017284@@SGCD_3==wt
chr5	156017114	156017304	chr5:156017114-156017304@@SGCD_3==wt
chr5	156017134	156017324	chr5:156017134-156017324@@SGCD_3==wt
chr5	156017154	156017344	chr5:156017154-156017344@@SGCD_3==wt
chr5	156017174	156017364	chr5:156017174-156017364@@SGCD_3==wt
chr5	156017194	156017384	chr5:156017194-156017384@@SGCD_3==wt
chr5	156017214	156017404	chr5:156017214-156017404@@SGCD_3==wt
chr5	156017234	156017424	chr5:156017234-156017424@@SGCD_3==wt
chr5	156017254	156017444	chr5:156017254-156017444@@SGCD_3==wt
chr5	156017274	156017464	chr5:156017274-156017464@@SGCD_3==wt
chr5	156017294	156017484	chr5:156017294-156017484@@SGCD_3==wt
chr5	156017314	156017504	chr5:156017314-156017504@@SGCD_3==wt
chr5	156017334	156017524	chr5:156017334-156017524@@SGCD_3==wt
chr5	156017354	156017544	chr5:156017354-156017544@@SGCD_3==wt
chr5	156017374	156017564	chr5:156017374-156017564@@SGCD_3==wt
chr5	156017394	156017584	chr5:156017394-156017584@@SGCD_3==wt
chr5	156017414	156017604	chr5:156017414-156017604@@SGCD_3==wt
chr5	156017434	156017624	chr5:156017434-156017624@@SGCD_3==wt
chr5	156017454	156017644	chr5:156017454-156017644@@SGCD_3==wt
chr5	156017474	156017664	chr5:156017474-156017664@@SGCD_3==wt
chr5	156017494	156017684	chr5:156017494-156017684@@SGCD_3==wt
chr5	156017514	156017704	chr5:156017514-156017704@@SGCD_3==wt
chr5	156017534	156017724	chr5:156017534-156017724@@SGCD_3==wt
chr5	156017554	156017744	chr5:156017554-156017744@@SGCD_3==wt
chr5	156017574	156017764	chr5:156017574-156017764@@SGCD_3==wt
chr5	156017594	156017784	chr5:156017594-156017784@@SGCD_3==wt
chr5	156017614	156017804	chr5:156017614-156017804@@SGCD_3==wt
chr5	156017634	156017824	chr5:156017634-156017824@@SGCD_3==wt
chr5	156017654	156017844	chr5:156017654-156017844@@SGCD_3==wt
chr5	156017674	156017864	chr5:156017674-156017864@@SGCD_3==wt
chr5	156017694	156017884	chr5:156017694-156017884@@SGCD_3==wt
chr5	156017714	156017904	chr5:156017714-156017904@@SGCD_3==wt
chr5	156017734	156017924	chr5:156017734-156017924@@SGCD_3==wt
chr5	156017754	156017944	chr5:156017754-156017944@@SGCD_3==wt
chr5	156017774	156017964	chr5:156017774-156017964@@SGCD_3==wt
chr5	156017794	156017984	chr5:156017794-156017984@@SGCD_3==wt
chr5	156017814	156018004	chr5:156017814-156018004@@SGCD_3==wt
chr5	156017834	156018024	chr5:156017834-156018024@@SGCD_3==wt
chr5	156017854	156018044	chr5:156017854-156018044@@SGCD_3==wt
chr5	156017874	156018064	chr5:156017874-156018064@@SGCD_3==wt
chr5	156017894	156018084	chr5:156017894-156018084@@SGCD_3==wt
chr5	156017914	156018104	chr5:156017914-156018104@@SGCD_3==wt
chr5	156017934	156018124	chr5:156017934-156018124@@SGCD_3==wt
chr5	156017954	156018144	chr5:156017954-156018144@@SGCD_3==wt
chr5	156017974	156018164	chr5:156017974-156018164@@SGCD_3==wt
chr5	156017994	156018184	chr5:156017994-156018184@@SGCD_3==wt
chr6	395255	395445	chr6:395255-395445@@IRF4_1==wt
chr6	395275	395465	chr6:395275-395465@@IRF4_1==wt
chr6	395295	395485	chr6:395295-395485@@IRF4_1==wt
chr6	395315	395505	chr6:395315-395505@@IRF4_1==wt
chr6	395335	395525	chr6:395335-395525@@IRF4_1==wt
chr6	395355	395545	chr6:395355-395545@@IRF4_1==wt
chr6	395375	395565	chr6:395375-395565@@IRF4_1==wt
chr6	395395	395585	chr6:395395-395585@@IRF4_1==wt
chr6	395415	395605	chr6:395415-395605@@IRF4_1==wt
chr6	395435	395625	chr6:395435-395625@@IRF4_1==wt
chr6	395455	395645	chr6:395455-395645@@IRF4_1==wt
chr6	395475	395665	chr6:395475-395665@@IRF4_1==wt
chr6	395495	395685	chr6:395495-395685@@IRF4_1==wt
chr6	395515	395705	chr6:395515-395705@@IRF4_1==wt
chr6	395535	395725	chr6:395535-395725@@IRF4_1==wt
chr6	395555	395745	chr6:395555-395745@@IRF4_1==wt
chr6	395575	395765	chr6:395575-395765@@IRF4_1==wt
chr6	395595	395785	chr6:395595-395785@@IRF4_1==wt
chr6	395615	395805	chr6:395615-395805@@IRF4_1==wt
chr6	395635	395825	chr6:395635-395825@@IRF4_1==wt
chr6	395655	395845	chr6:395655-395845@@IRF4_1==wt
chr6	395675	395865	chr6:395675-395865@@IRF4_1==wt
chr6	395695	395885	chr6:395695-395885@@IRF4_1==wt
chr6	395715	395905	chr6:395715-395905@@IRF4_1==wt
chr6	395735	395925	chr6:395735-395925@@IRF4_1==wt
chr6	395755	395945	chr6:395755-395945@@IRF4_1==wt
chr6	395775	395965	chr6:395775-395965@@IRF4_1==wt
chr6	395795	395985	chr6:395795-395985@@IRF4_1==wt
chr6	395815	396005	chr6:395815-396005@@IRF4_1==wt
chr6	395835	396025	chr6:395835-396025@@IRF4_1==wt
chr6	395855	396045	chr6:395855-396045@@IRF4_1==wt
chr6	395875	396065	chr6:395875-396065@@IRF4_1==wt
chr6	395895	396085	chr6:395895-396085@@IRF4_1==wt
chr6	395915	396105	chr6:395915-396105@@IRF4_1==wt
chr6	395935	396125	chr6:395935-396125@@IRF4_1==wt
chr6	395955	396145	chr6:395955-396145@@IRF4_1==wt
chr6	395975	396165	chr6:395975-396165@@IRF4_1==wt
chr6	395995	396185	chr6:395995-396185@@IRF4_1==wt
chr6	396015	396205	chr6:396015-396205@@IRF4_1==wt
chr6	396035	396225	chr6:396035-396225@@IRF4_1==wt
chr6	396055	396245	chr6:396055-396245@@IRF4_1==wt
chr6	396075	396265	chr6:396075-396265@@IRF4_1==wt
chr6	396095	396285	chr6:396095-396285@@IRF4_1==wt
chr6	396115	396305	chr6:396115-396305@@IRF4_1==wt
chr6	396135	396325	chr6:396135-396325@@IRF4_1==wt
chr6	396155	396345	chr6:396155-396345@@IRF4_1==wt
chr6	396175	396365	chr6:396175-396365@@IRF4_1==wt
chr6	396195	396385	chr6:396195-396385@@IRF4_1==wt
chr6	396215	396405	chr6:396215-396405@@IRF4_1==wt
chr6	396235	396425	chr6:396235-396425@@IRF4_1==wt
chr6	396255	396445	chr6:396255-396445@@IRF4_1==wt
chr6	396275	396465	chr6:396275-396465@@IRF4_1==wt
chr6	396295	396485	chr6:396295-396485@@IRF4_1==wt
chr6	396315	396505	chr6:396315-396505@@IRF4_1==wt
chr6	396335	396525	chr6:396335-396525@@IRF4_1==wt
chr6	396355	396545	chr6:396355-396545@@IRF4_1==wt
chr6	396375	396565	chr6:396375-396565@@IRF4_1==wt
chr6	396395	396585	chr6:396395-396585@@IRF4_1==wt
chr6	396415	396605	chr6:396415-396605@@IRF4_1==wt
chr6	396435	396625	chr6:396435-396625@@IRF4_1==wt
chr6	396455	396645	chr6:396455-396645@@IRF4_1==wt
chr6	396475	396665	chr6:396475-396665@@IRF4_1==wt
chr6	396495	396685	chr6:396495-396685@@IRF4_1==wt
chr6	396515	396705	chr6:396515-396705@@IRF4_1==wt
chr6	396535	396725	chr6:396535-396725@@IRF4_1==wt
chr6	396555	396745	chr6:396555-396745@@IRF4_1==wt
chr6	396575	396765	chr6:396575-396765@@IRF4_1==wt
chr6	396595	396785	chr6:396595-396785@@IRF4_1==wt
chr6	396615	396805	chr6:396615-396805@@IRF4_1==wt
chr6	396635	396825	chr6:396635-396825@@IRF4_1==wt
chr6	396655	396845	chr6:396655-396845@@IRF4_1==wt
chr6	396675	396865	chr6:396675-396865@@IRF4_1==wt
chr6	396695	396885	chr6:396695-396885@@IRF4_1==wt
chr6	396715	396905	chr6:396715-396905@@IRF4_1==wt
chr6	396735	396925	chr6:396735-396925@@IRF4_1==wt
chr6	396755	396945	chr6:396755-396945@@IRF4_1==wt
chr6	396775	396965	chr6:396775-396965@@IRF4_1==wt
chr6	396795	396985	chr6:396795-396985@@IRF4_1==wt
chr6	396815	397005	chr6:396815-397005@@IRF4_1==wt
chr6	396835	397025	chr6:396835-397025@@IRF4_1==wt
chr6	396855	397045	chr6:396855-397045@@IRF4_1==wt
chr6	396875	397065	chr6:396875-397065@@IRF4_1==wt
chr6	396895	397085	chr6:396895-397085@@IRF4_1==wt
chr6	396915	397105	chr6:396915-397105@@IRF4_1==wt
chr6	396935	397125	chr6:396935-397125@@IRF4_1==wt
chr6	396955	397145	chr6:396955-397145@@IRF4_1==wt
chr6	396975	397165	chr6:396975-397165@@IRF4_1==wt
chr6	396995	397185	chr6:396995-397185@@IRF4_1==wt
chr6	397015	397205	chr6:397015-397205@@IRF4_1==wt
chr6	12289614	12289804	chr6:12289614-12289804@@EDN1_1==mut_cisbp_M5907_chr6
chr6	12289634	12289824	chr6:12289634-12289824@@EDN1_1==mut_cisbp_M5907_chr6
chr6	12289654	12289844	chr6:12289654-12289844@@EDN1_1==wt
chr6	12289674	12289864	chr6:12289674-12289864@@EDN1_1==wt
chr6	12289694	12289884	chr6:12289694-12289884@@EDN1_1==wt
chr6	12289714	12289904	chr6:12289714-12289904@@EDN1_1==wt
chr6	12289734	12289924	chr6:12289734-12289924@@EDN1_1==wt
chr6	12289754	12289944	chr6:12289754-12289944@@EDN1_1==wt
chr6	12289774	12289964	chr6:12289774-12289964@@EDN1_1==wt
chr6	12289794	12289984	chr6:12289794-12289984@@EDN1_1==wt
chr6	12289814	12290004	chr6:12289814-12290004@@EDN1_1==wt
chr6	12289834	12290024	chr6:12289834-12290024@@EDN1_1==wt
chr6	12289854	12290044	chr6:12289854-12290044@@EDN1_1==wt
chr6	12289874	12290064	chr6:12289874-12290064@@EDN1_1==wt
chr6	12289894	12290084	chr6:12289894-12290084@@EDN1_1==wt
chr6	12289914	12290104	chr6:12289914-12290104@@EDN1_1==wt
chr6	12289934	12290124	chr6:12289934-12290124@@EDN1_1==wt
chr6	12289954	12290144	chr6:12289954-12290144@@EDN1_1==wt
chr6	12289974	12290164	chr6:12289974-12290164@@EDN1_1==wt
chr6	12289994	12290184	chr6:12289994-12290184@@EDN1_1==wt
chr6	12290014	12290204	chr6:12290014-12290204@@EDN1_1==wt
chr6	12290034	12290224	chr6:12290034-12290224@@EDN1_1==wt
chr6	12290054	12290244	chr6:12290054-12290244@@EDN1_1==wt
chr6	12290074	12290264	chr6:12290074-12290264@@EDN1_1==wt
chr6	12290094	12290284	chr6:12290094-12290284@@EDN1_1==wt
chr6	12290114	12290304	chr6:12290114-12290304@@EDN1_1==wt
chr6	12290134	12290324	chr6:12290134-12290324@@EDN1_1==wt
chr6	12290154	12290344	chr6:12290154-12290344@@EDN1_1==wt
chr6	12290174	12290364	chr6:12290174-12290364@@EDN1_1==wt
chr6	12290194	12290384	chr6:12290194-12290384@@EDN1_1==wt
chr6	12290214	12290404	chr6:12290214-12290404@@EDN1_1==wt
chr6	12290234	12290424	chr6:12290234-12290424@@EDN1_1==wt
chr6	12290254	12290444	chr6:12290254-12290444@@EDN1_1==wt
chr6	12290274	12290464	chr6:12290274-12290464@@EDN1_1==wt
chr6	12290294	12290484	chr6:12290294-12290484@@EDN1_1==wt
chr6	12290314	12290504	chr6:12290314-12290504@@EDN1_1==wt
chr6	12290334	12290524	chr6:12290334-12290524@@EDN1_1==wt
chr6	12290354	12290544	chr6:12290354-12290544@@EDN1_1==wt
chr6	12290374	12290564	chr6:12290374-12290564@@EDN1_1==wt
chr6	12290394	12290584	chr6:12290394-12290584@@EDN1_1==wt
chr6	12290414	12290604	chr6:12290414-12290604@@EDN1_1==wt
chr6	12290434	12290624	chr6:12290434-12290624@@EDN1_1==wt
chr6	12290454	12290644	chr6:12290454-12290644@@EDN1_1==wt
chr6	12290474	12290664	chr6:12290474-12290664@@EDN1_1==wt
chr6	12290494	12290684	chr6:12290494-12290684@@EDN1_1==wt
chr6	12290514	12290704	chr6:12290514-12290704@@EDN1_1==wt
chr6	12290534	12290724	chr6:12290534-12290724@@EDN1_1==wt
chr6	12290554	12290744	chr6:12290554-12290744@@EDN1_1==wt
chr6	12290574	12290764	chr6:12290574-12290764@@EDN1_1==wt
chr6	12290594	12290784	chr6:12290594-12290784@@EDN1_1==wt
chr6	12290614	12290804	chr6:12290614-12290804@@EDN1_1==wt
chr6	12290634	12290824	chr6:12290634-12290824@@EDN1_1==wt
chr6	12290654	12290844	chr6:12290654-12290844@@EDN1_1==wt
chr6	12290674	12290864	chr6:12290674-12290864@@EDN1_1==wt
chr6	12290694	12290884	chr6:12290694-12290884@@EDN1_1==wt
chr6	12290714	12290904	chr6:12290714-12290904@@EDN1_1==wt
chr6	12290734	12290924	chr6:12290734-12290924@@EDN1_1==wt
chr6	12290754	12290944	chr6:12290754-12290944@@EDN1_1==wt
chr6	12290774	12290964	chr6:12290774-12290964@@EDN1_1==wt
chr6	12290794	12290984	chr6:12290794-12290984@@EDN1_1==wt
chr6	12290814	12291004	chr6:12290814-12291004@@EDN1_1==wt
chr6	12290834	12291024	chr6:12290834-12291024@@EDN1_1==wt
chr6	12290854	12291044	chr6:12290854-12291044@@EDN1_1==wt
chr6	12290874	12291064	chr6:12290874-12291064@@EDN1_1==wt
chr6	12290894	12291084	chr6:12290894-12291084@@EDN1_1==wt
chr6	12290914	12291104	chr6:12290914-12291104@@EDN1_1==wt
chr6	12290934	12291124	chr6:12290934-12291124@@EDN1_1==wt
chr6	12290954	12291144	chr6:12290954-12291144@@EDN1_1==wt
chr6	12290974	12291164	chr6:12290974-12291164@@EDN1_1==wt
chr6	12290994	12291184	chr6:12290994-12291184@@EDN1_1==wt
chr6	12291014	12291204	chr6:12291014-12291204@@EDN1_1==wt
chr6	12291034	12291224	chr6:12291034-12291224@@EDN1_1==wt
chr6	12291054	12291244	chr6:12291054-12291244@@EDN1_1==wt
chr6	12291074	12291264	chr6:12291074-12291264@@EDN1_1==wt
chr6	12291094	12291284	chr6:12291094-12291284@@EDN1_1==wt
chr6	12573005	12573195	chr6:12573005-12573195@@EDN1_3==wt
chr6	12573025	12573215	chr6:12573025-12573215@@EDN1_3==wt
chr6	12573045	12573235	chr6:12573045-12573235@@EDN1_3==wt
chr6	12573065	12573255	chr6:12573065-12573255@@EDN1_3==wt
chr6	12573085	12573275	chr6:12573085-12573275@@EDN1_3==wt
chr6	12573105	12573295	chr6:12573105-12573295@@EDN1_3==wt
chr6	12573125	12573315	chr6:12573125-12573315@@EDN1_3==wt
chr6	12573145	12573335	chr6:12573145-12573335@@EDN1_3==wt
chr6	12573165	12573355	chr6:12573165-12573355@@EDN1_3==wt
chr6	12573185	12573375	chr6:12573185-12573375@@EDN1_3==wt
chr6	12573205	12573395	chr6:12573205-12573395@@EDN1_3==wt
chr6	12573225	12573415	chr6:12573225-12573415@@EDN1_3==wt
chr6	12573245	12573435	chr6:12573245-12573435@@EDN1_3==wt
chr6	12573265	12573455	chr6:12573265-12573455@@EDN1_3==wt
chr6	12573285	12573475	chr6:12573285-12573475@@EDN1_3==wt
chr6	12573305	12573495	chr6:12573305-12573495@@EDN1_3==wt
chr6	12573325	12573515	chr6:12573325-12573515@@EDN1_3==wt
chr6	12573345	12573535	chr6:12573345-12573535@@EDN1_3==wt
chr6	12573365	12573555	chr6:12573365-12573555@@EDN1_3==wt
chr6	12573385	12573575	chr6:12573385-12573575@@EDN1_3==wt
chr6	12573405	12573595	chr6:12573405-12573595@@EDN1_3==wt
chr6	12573425	12573615	chr6:12573425-12573615@@EDN1_3==wt
chr6	12573445	12573635	chr6:12573445-12573635@@EDN1_3==wt
chr6	12573465	12573655	chr6:12573465-12573655@@EDN1_3==wt
chr6	12573485	12573675	chr6:12573485-12573675@@EDN1_3==wt
chr6	12573505	12573695	chr6:12573505-12573695@@EDN1_3==wt
chr6	12573525	12573715	chr6:12573525-12573715@@EDN1_3==wt
chr6	12573545	12573735	chr6:12573545-12573735@@EDN1_3==wt
chr6	12573565	12573755	chr6:12573565-12573755@@EDN1_3==wt
chr6	12573585	12573775	chr6:12573585-12573775@@EDN1_3==wt
chr6	12573605	12573795	chr6:12573605-12573795@@EDN1_3==wt
chr6	12573625	12573815	chr6:12573625-12573815@@EDN1_3==wt
chr6	12573645	12573835	chr6:12573645-12573835@@EDN1_3==wt
chr6	12573665	12573855	chr6:12573665-12573855@@EDN1_3==wt
chr6	12573685	12573875	chr6:12573685-12573875@@EDN1_3==wt
chr6	12573705	12573895	chr6:12573705-12573895@@EDN1_3==wt
chr6	12573725	12573915	chr6:12573725-12573915@@EDN1_3==wt
chr6	12573745	12573935	chr6:12573745-12573935@@EDN1_3==wt
chr6	12573765	12573955	chr6:12573765-12573955@@EDN1_3==wt
chr6	12573785	12573975	chr6:12573785-12573975@@EDN1_3==wt
chr6	12573805	12573995	chr6:12573805-12573995@@EDN1_3==wt
chr6	12573825	12574015	chr6:12573825-12574015@@EDN1_3==wt
chr6	12573845	12574035	chr6:12573845-12574035@@EDN1_3==wt
chr6	12573865	12574055	chr6:12573865-12574055@@EDN1_3==wt
chr6	12573885	12574075	chr6:12573885-12574075@@EDN1_3==wt
chr6	12573905	12574095	chr6:12573905-12574095@@EDN1_3==wt
chr6	12573925	12574115	chr6:12573925-12574115@@EDN1_3==wt
chr6	12573945	12574135	chr6:12573945-12574135@@EDN1_3==wt
chr6	12573965	12574155	chr6:12573965-12574155@@EDN1_3==wt
chr6	12573985	12574175	chr6:12573985-12574175@@EDN1_3==wt
chr6	12574005	12574195	chr6:12574005-12574195@@EDN1_3==wt
chr6	90121330	90121520	chr6:90121330-90121520@@RRAGD_1==wt
chr6	90121350	90121540	chr6:90121350-90121540@@RRAGD_1==wt
chr6	90121370	90121560	chr6:90121370-90121560@@RRAGD_1==wt
chr6	90121390	90121580	chr6:90121390-90121580@@RRAGD_1==wt
chr6	90121410	90121600	chr6:90121410-90121600@@RRAGD_1==wt
chr6	90121430	90121620	chr6:90121430-90121620@@RRAGD_1==wt
chr6	90121450	90121640	chr6:90121450-90121640@@RRAGD_1==wt
chr6	90121470	90121660	chr6:90121470-90121660@@RRAGD_1==wt
chr6	90121490	90121680	chr6:90121490-90121680@@RRAGD_1==wt
chr6	90121510	90121700	chr6:90121510-90121700@@RRAGD_1==wt
chr6	90121530	90121720	chr6:90121530-90121720@@RRAGD_1==wt
chr6	90121550	90121740	chr6:90121550-90121740@@RRAGD_1==wt
chr6	90121570	90121760	chr6:90121570-90121760@@RRAGD_1==wt
chr6	90121590	90121780	chr6:90121590-90121780@@RRAGD_1==wt
chr6	90121610	90121800	chr6:90121610-90121800@@RRAGD_1==wt
chr6	90121630	90121820	chr6:90121630-90121820@@RRAGD_1==wt
chr6	90121650	90121840	chr6:90121650-90121840@@RRAGD_1==wt
chr6	90121670	90121860	chr6:90121670-90121860@@RRAGD_1==wt
chr6	90121690	90121880	chr6:90121690-90121880@@RRAGD_1==wt
chr6	90121710	90121900	chr6:90121710-90121900@@RRAGD_1==wt
chr6	90121730	90121920	chr6:90121730-90121920@@RRAGD_1==wt
chr6	90121750	90121940	chr6:90121750-90121940@@RRAGD_1==wt
chr6	90121770	90121960	chr6:90121770-90121960@@RRAGD_1==wt
chr6	90121790	90121980	chr6:90121790-90121980@@RRAGD_1==wt
chr6	90121810	90122000	chr6:90121810-90122000@@RRAGD_1==wt
chr6	90121830	90122020	chr6:90121830-90122020@@RRAGD_1==wt
chr6	90121850	90122040	chr6:90121850-90122040@@RRAGD_1==wt
chr6	90121870	90122060	chr6:90121870-90122060@@RRAGD_1==wt
chr6	90121890	90122080	chr6:90121890-90122080@@RRAGD_1==wt
chr6	90121910	90122100	chr6:90121910-90122100@@RRAGD_1==wt
chr6	90121930	90122120	chr6:90121930-90122120@@RRAGD_1==wt
chr6	90121950	90122140	chr6:90121950-90122140@@RRAGD_1==wt
chr6	90121970	90122160	chr6:90121970-90122160@@RRAGD_1==wt
chr6	90121990	90122180	chr6:90121990-90122180@@RRAGD_1==wt
chr6	90122010	90122200	chr6:90122010-90122200@@RRAGD_1==wt
chr6	90122030	90122220	chr6:90122030-90122220@@RRAGD_1==wt
chr6	90122050	90122240	chr6:90122050-90122240@@RRAGD_1==wt
chr6	90122070	90122260	chr6:90122070-90122260@@RRAGD_1==wt
chr6	90122090	90122280	chr6:90122090-90122280@@RRAGD_1==wt
chr6	90122110	90122300	chr6:90122110-90122300@@RRAGD_1==wt
chr6	90122130	90122320	chr6:90122130-90122320@@RRAGD_1==wt
chr6	90122150	90122340	chr6:90122150-90122340@@RRAGD_1==wt
chr6	90122170	90122360	chr6:90122170-90122360@@RRAGD_1==wt
chr6	90122190	90122380	chr6:90122190-90122380@@RRAGD_1==wt
chr6	90122210	90122400	chr6:90122210-90122400@@RRAGD_1==wt
chr6	90122230	90122420	chr6:90122230-90122420@@RRAGD_1==wt
chr6	90122250	90122440	chr6:90122250-90122440@@RRAGD_1==wt
chr6	90122270	90122460	chr6:90122270-90122460@@RRAGD_1==wt
chr6	90122290	90122480	chr6:90122290-90122480@@RRAGD_1==wt
chr6	90122310	90122500	chr6:90122310-90122500@@RRAGD_1==wt
chr6	90122330	90122520	chr6:90122330-90122520@@RRAGD_1==wt
chr6	90122350	90122540	chr6:90122350-90122540@@RRAGD_1==wt
chr6	90122370	90122560	chr6:90122370-90122560@@RRAGD_1==wt
chr6	90122390	90122580	chr6:90122390-90122580@@RRAGD_1==wt
chr6	90122410	90122600	chr6:90122410-90122600@@RRAGD_1==wt
chr6	90122430	90122620	chr6:90122430-90122620@@RRAGD_1==wt
chr6	90122450	90122640	chr6:90122450-90122640@@RRAGD_1==wt
chr6	90122470	90122660	chr6:90122470-90122660@@RRAGD_1==wt
chr6	90122490	90122680	chr6:90122490-90122680@@RRAGD_1==wt
chr6	90122510	90122700	chr6:90122510-90122700@@RRAGD_1==wt
chr6	90122530	90122720	chr6:90122530-90122720@@RRAGD_1==wt
chr6	90122550	90122740	chr6:90122550-90122740@@RRAGD_1==wt
chr6	90122570	90122760	chr6:90122570-90122760@@RRAGD_1==wt
chr6	90122590	90122780	chr6:90122590-90122780@@RRAGD_1==wt
chr6	90122610	90122800	chr6:90122610-90122800@@RRAGD_1==wt
chr6	90122630	90122820	chr6:90122630-90122820@@RRAGD_1==wt
chr6	90122650	90122840	chr6:90122650-90122840@@RRAGD_1==wt
chr6	90122670	90122860	chr6:90122670-90122860@@RRAGD_1==wt
chr6	90122690	90122880	chr6:90122690-90122880@@RRAGD_1==wt
chr6	90122710	90122900	chr6:90122710-90122900@@RRAGD_1==wt
chr6	90122730	90122920	chr6:90122730-90122920@@RRAGD_1==wt
chr6	90122750	90122940	chr6:90122750-90122940@@RRAGD_1==wt
chr6	90122770	90122960	chr6:90122770-90122960@@RRAGD_1==wt
chr6	90122790	90122980	chr6:90122790-90122980@@RRAGD_1==wt
chr6	90122810	90123000	chr6:90122810-90123000@@RRAGD_1==wt
chr6	90122830	90123020	chr6:90122830-90123020@@RRAGD_1==wt
chr6	90122850	90123040	chr6:90122850-90123040@@RRAGD_1==wt
chr6	90122870	90123060	chr6:90122870-90123060@@RRAGD_1==wt
chr6	90122890	90123080	chr6:90122890-90123080@@RRAGD_1==wt
chr6	90122910	90123100	chr6:90122910-90123100@@RRAGD_1==wt
chr6	90122930	90123120	chr6:90122930-90123120@@RRAGD_1==wt
chr6	90122950	90123140	chr6:90122950-90123140@@RRAGD_1==wt
chr6	90122970	90123160	chr6:90122970-90123160@@RRAGD_1==wt
chr6	90122990	90123180	chr6:90122990-90123180@@RRAGD_1==wt
chr6	90123010	90123200	chr6:90123010-90123200@@RRAGD_1==wt
chr6	90123030	90123220	chr6:90123030-90123220@@RRAGD_1==wt
chr6	90123050	90123240	chr6:90123050-90123240@@RRAGD_1==wt
chr6	90123070	90123260	chr6:90123070-90123260@@RRAGD_1==wt
chr6	90123090	90123280	chr6:90123090-90123280@@RRAGD_1==wt
chr6	90123110	90123300	chr6:90123110-90123300@@RRAGD_1==wt
chr6	90123130	90123320	chr6:90123130-90123320@@RRAGD_1==wt
chr7	93930351	93930541	chr7:93930351-93930541@@COL1A2_1==wt
chr7	93930371	93930561	chr7:93930371-93930561@@COL1A2_1==wt
chr7	93930391	93930581	chr7:93930391-93930581@@COL1A2_1==wt
chr7	93930411	93930601	chr7:93930411-93930601@@COL1A2_1==wt
chr7	93930431	93930621	chr7:93930431-93930621@@COL1A2_1==wt
chr7	93930451	93930641	chr7:93930451-93930641@@COL1A2_1==wt
chr7	93930471	93930661	chr7:93930471-93930661@@COL1A2_1==wt
chr7	93930491	93930681	chr7:93930491-93930681@@COL1A2_1==wt
chr7	93930511	93930701	chr7:93930511-93930701@@COL1A2_1==wt
chr7	93930531	93930721	chr7:93930531-93930721@@COL1A2_1==wt
chr7	93930551	93930741	chr7:93930551-93930741@@COL1A2_1==wt
chr7	93930571	93930761	chr7:93930571-93930761@@COL1A2_1==wt
chr7	93930591	93930781	chr7:93930591-93930781@@COL1A2_1==wt
chr7	93930611	93930801	chr7:93930611-93930801@@COL1A2_1==wt
chr7	93930631	93930821	chr7:93930631-93930821@@COL1A2_1==wt
chr7	93930651	93930841	chr7:93930651-93930841@@COL1A2_1==wt
chr7	93930671	93930861	chr7:93930671-93930861@@COL1A2_1==wt
chr7	93930691	93930881	chr7:93930691-93930881@@COL1A2_1==wt
chr7	93930711	93930901	chr7:93930711-93930901@@COL1A2_1==wt
chr7	93930731	93930921	chr7:93930731-93930921@@COL1A2_1==wt
chr7	93930751	93930941	chr7:93930751-93930941@@COL1A2_1==wt
chr7	93930771	93930961	chr7:93930771-93930961@@COL1A2_1==wt
chr7	93930791	93930981	chr7:93930791-93930981@@COL1A2_1==wt
chr7	93930811	93931001	chr7:93930811-93931001@@COL1A2_1==wt
chr7	93930831	93931021	chr7:93930831-93931021@@COL1A2_1==wt
chr7	93930851	93931041	chr7:93930851-93931041@@COL1A2_1==wt
chr7	93930871	93931061	chr7:93930871-93931061@@COL1A2_1==wt
chr7	93930891	93931081	chr7:93930891-93931081@@COL1A2_1==wt
chr7	93930911	93931101	chr7:93930911-93931101@@COL1A2_1==wt
chr7	93930931	93931121	chr7:93930931-93931121@@COL1A2_1==wt
chr7	93930951	93931141	chr7:93930951-93931141@@COL1A2_1==wt
chr7	93930971	93931161	chr7:93930971-93931161@@COL1A2_1==wt
chr7	93930991	93931181	chr7:93930991-93931181@@COL1A2_1==wt
chr7	93931011	93931201	chr7:93931011-93931201@@COL1A2_1==wt
chr7	93931031	93931221	chr7:93931031-93931221@@COL1A2_1==wt
chr7	93931051	93931241	chr7:93931051-93931241@@COL1A2_1==wt
chr7	93931071	93931261	chr7:93931071-93931261@@COL1A2_1==wt
chr7	93931091	93931281	chr7:93931091-93931281@@COL1A2_1==wt
chr7	93931111	93931301	chr7:93931111-93931301@@COL1A2_1==wt
chr7	93931131	93931321	chr7:93931131-93931321@@COL1A2_1==wt
chr7	93931151	93931341	chr7:93931151-93931341@@COL1A2_1==wt
chr7	93931171	93931361	chr7:93931171-93931361@@COL1A2_1==wt
chr7	93931191	93931381	chr7:93931191-93931381@@COL1A2_1==wt
chr7	93931211	93931401	chr7:93931211-93931401@@COL1A2_1==wt
chr7	93931231	93931421	chr7:93931231-93931421@@COL1A2_1==wt
chr7	93931251	93931441	chr7:93931251-93931441@@COL1A2_1==wt
chr7	93931271	93931461	chr7:93931271-93931461@@COL1A2_1==wt
chr7	93931291	93931481	chr7:93931291-93931481@@COL1A2_1==wt
chr7	93931311	93931501	chr7:93931311-93931501@@COL1A2_1==wt
chr7	93931331	93931521	chr7:93931331-93931521@@COL1A2_1==wt
chr7	93931351	93931541	chr7:93931351-93931541@@COL1A2_1==wt
chr7	93931371	93931561	chr7:93931371-93931561@@COL1A2_1==wt
chr7	93931391	93931581	chr7:93931391-93931581@@COL1A2_1==wt
chr7	93931411	93931601	chr7:93931411-93931601@@COL1A2_1==wt
chr7	93931431	93931621	chr7:93931431-93931621@@COL1A2_1==wt
chr7	100659934	100660124	chr7:100659934-100660124@@SERPINE1_1==wt
chr7	100659954	100660144	chr7:100659954-100660144@@SERPINE1_1==wt
chr7	100659974	100660164	chr7:100659974-100660164@@SERPINE1_1==wt
chr7	100659994	100660184	chr7:100659994-100660184@@SERPINE1_1==wt
chr7	100660014	100660204	chr7:100660014-100660204@@SERPINE1_1==wt
chr7	100660034	100660224	chr7:100660034-100660224@@SERPINE1_1==wt
chr7	100660054	100660244	chr7:100660054-100660244@@SERPINE1_1==wt
chr7	100660074	100660264	chr7:100660074-100660264@@SERPINE1_1==wt
chr7	100660094	100660284	chr7:100660094-100660284@@SERPINE1_1==wt
chr7	100660114	100660304	chr7:100660114-100660304@@SERPINE1_1==wt
chr7	100660134	100660324	chr7:100660134-100660324@@SERPINE1_1==wt
chr7	100660154	100660344	chr7:100660154-100660344@@SERPINE1_1==wt
chr7	100660174	100660364	chr7:100660174-100660364@@SERPINE1_1==wt
chr7	100660194	100660384	chr7:100660194-100660384@@SERPINE1_1==wt
chr7	100660214	100660404	chr7:100660214-100660404@@SERPINE1_1==wt
chr7	100660234	100660424	chr7:100660234-100660424@@SERPINE1_1==wt
chr7	100660254	100660444	chr7:100660254-100660444@@SERPINE1_1==wt
chr7	100660274	100660464	chr7:100660274-100660464@@SERPINE1_1==wt
chr7	100660294	100660484	chr7:100660294-100660484@@SERPINE1_1==wt
chr7	100660314	100660504	chr7:100660314-100660504@@SERPINE1_1==wt
chr7	100660334	100660524	chr7:100660334-100660524@@SERPINE1_1==wt
chr7	100660354	100660544	chr7:100660354-100660544@@SERPINE1_1==wt
chr7	100660374	100660564	chr7:100660374-100660564@@SERPINE1_1==wt
chr7	100660394	100660584	chr7:100660394-100660584@@SERPINE1_1==wt
chr7	100660414	100660604	chr7:100660414-100660604@@SERPINE1_1==wt
chr7	100660434	100660624	chr7:100660434-100660624@@SERPINE1_1==wt
chr7	100660454	100660644	chr7:100660454-100660644@@SERPINE1_1==wt
chr7	100660474	100660664	chr7:100660474-100660664@@SERPINE1_1==wt
chr7	100660494	100660684	chr7:100660494-100660684@@SERPINE1_1==wt
chr7	100660514	100660704	chr7:100660514-100660704@@SERPINE1_1==wt
chr7	100660534	100660724	chr7:100660534-100660724@@SERPINE1_1==wt
chr7	100660554	100660744	chr7:100660554-100660744@@SERPINE1_1==wt
chr7	100660574	100660764	chr7:100660574-100660764@@SERPINE1_1==wt
chr7	100660594	100660784	chr7:100660594-100660784@@SERPINE1_1==wt
chr7	100660614	100660804	chr7:100660614-100660804@@SERPINE1_1==wt
chr7	100660634	100660824	chr7:100660634-100660824@@SERPINE1_1==wt
chr7	100660654	100660844	chr7:100660654-100660844@@SERPINE1_1==wt
chr7	100660674	100660864	chr7:100660674-100660864@@SERPINE1_1==wt
chr7	100660694	100660884	chr7:100660694-100660884@@SERPINE1_1==wt
chr7	100660714	100660904	chr7:100660714-100660904@@SERPINE1_1==wt
chr7	100660734	100660924	chr7:100660734-100660924@@SERPINE1_1==wt
chr7	100660754	100660944	chr7:100660754-100660944@@SERPINE1_1==wt
chr7	100660774	100660964	chr7:100660774-100660964@@SERPINE1_1==wt
chr7	100660794	100660984	chr7:100660794-100660984@@SERPINE1_1==wt
chr7	100660814	100661004	chr7:100660814-100661004@@SERPINE1_1==wt
chr7	100660834	100661024	chr7:100660834-100661024@@SERPINE1_1==wt
chr7	100660854	100661044	chr7:100660854-100661044@@SERPINE1_1==wt
chr7	100660874	100661064	chr7:100660874-100661064@@SERPINE1_1==wt
chr7	100660894	100661084	chr7:100660894-100661084@@SERPINE1_1==wt
chr7	100660914	100661104	chr7:100660914-100661104@@SERPINE1_1==wt
chr7	100660934	100661124	chr7:100660934-100661124@@SERPINE1_1==wt
chr7	100660954	100661144	chr7:100660954-100661144@@SERPINE1_1==wt
chr7	100660974	100661164	chr7:100660974-100661164@@SERPINE1_1==wt
chr7	100660994	100661184	chr7:100660994-100661184@@SERPINE1_1==wt
chr7	100661014	100661204	chr7:100661014-100661204@@SERPINE1_1==wt
chr7	100661034	100661224	chr7:100661034-100661224@@SERPINE1_1==wt
chr7	100661054	100661244	chr7:100661054-100661244@@SERPINE1_1==wt
chr7	100661074	100661264	chr7:100661074-100661264@@SERPINE1_1==wt
chr7	100661094	100661284	chr7:100661094-100661284@@SERPINE1_1==wt
chr7	100661114	100661304	chr7:100661114-100661304@@SERPINE1_1==wt
chr7	100661134	100661324	chr7:100661134-100661324@@SERPINE1_1==wt
chr7	100661154	100661344	chr7:100661154-100661344@@SERPINE1_1==wt
chr7	100661174	100661364	chr7:100661174-100661364@@SERPINE1_1==wt
chr7	100661194	100661384	chr7:100661194-100661384@@SERPINE1_1==wt
chr7	100741969	100742159	chr7:100741969-100742159@@SERPINE1_2==wt
chr7	100741989	100742179	chr7:100741989-100742179@@SERPINE1_2==wt
chr7	100742009	100742199	chr7:100742009-100742199@@SERPINE1_2==wt
chr7	100742029	100742219	chr7:100742029-100742219@@SERPINE1_2==wt
chr7	100742049	100742239	chr7:100742049-100742239@@SERPINE1_2==wt
chr7	100742069	100742259	chr7:100742069-100742259@@SERPINE1_2==wt
chr7	100742089	100742279	chr7:100742089-100742279@@SERPINE1_2==wt
chr7	100742109	100742299	chr7:100742109-100742299@@SERPINE1_2==wt
chr7	100742129	100742319	chr7:100742129-100742319@@SERPINE1_2==wt
chr7	100742149	100742339	chr7:100742149-100742339@@SERPINE1_2==wt
chr7	100742169	100742359	chr7:100742169-100742359@@SERPINE1_2==wt
chr7	100742189	100742379	chr7:100742189-100742379@@SERPINE1_2==wt
chr7	100742209	100742399	chr7:100742209-100742399@@SERPINE1_2==wt
chr7	100742229	100742419	chr7:100742229-100742419@@SERPINE1_2==wt
chr7	100742249	100742439	chr7:100742249-100742439@@SERPINE1_2==wt
chr7	100742269	100742459	chr7:100742269-100742459@@SERPINE1_2==wt
chr7	100742289	100742479	chr7:100742289-100742479@@SERPINE1_2==wt
chr7	100742309	100742499	chr7:100742309-100742499@@SERPINE1_2==wt
chr7	100742329	100742519	chr7:100742329-100742519@@SERPINE1_2==wt
chr7	100742349	100742539	chr7:100742349-100742539@@SERPINE1_2==wt
chr7	100742369	100742559	chr7:100742369-100742559@@SERPINE1_2==wt
chr7	100742389	100742579	chr7:100742389-100742579@@SERPINE1_2==wt
chr7	100742409	100742599	chr7:100742409-100742599@@SERPINE1_2==wt
chr7	100742429	100742619	chr7:100742429-100742619@@SERPINE1_2==wt
chr7	100742449	100742639	chr7:100742449-100742639@@SERPINE1_2==wt
chr7	100742469	100742659	chr7:100742469-100742659@@SERPINE1_2==wt
chr7	100742489	100742679	chr7:100742489-100742679@@SERPINE1_2==wt
chr7	100742509	100742699	chr7:100742509-100742699@@SERPINE1_2==wt
chr7	100742529	100742719	chr7:100742529-100742719@@SERPINE1_2==wt
chr7	100742549	100742739	chr7:100742549-100742739@@SERPINE1_2==wt
chr7	100742569	100742759	chr7:100742569-100742759@@SERPINE1_2==wt
chr7	100742589	100742779	chr7:100742589-100742779@@SERPINE1_2==wt
chr7	100742609	100742799	chr7:100742609-100742799@@SERPINE1_2==wt
chr7	100742629	100742819	chr7:100742629-100742819@@SERPINE1_2==wt
chr7	100742649	100742839	chr7:100742649-100742839@@SERPINE1_2==wt
chr7	100742669	100742859	chr7:100742669-100742859@@SERPINE1_2==wt
chr7	100742689	100742879	chr7:100742689-100742879@@SERPINE1_2==wt
chr7	100742709	100742899	chr7:100742709-100742899@@SERPINE1_2==wt
chr7	100742729	100742919	chr7:100742729-100742919@@SERPINE1_2==wt
chr7	100742749	100742939	chr7:100742749-100742939@@SERPINE1_2==wt
chr7	100742769	100742959	chr7:100742769-100742959@@SERPINE1_2==wt
chr7	100742789	100742979	chr7:100742789-100742979@@SERPINE1_2==wt
chr7	100742809	100742999	chr7:100742809-100742999@@SERPINE1_2==wt
chr7	100742829	100743019	chr7:100742829-100743019@@SERPINE1_2==wt
chr7	100742849	100743039	chr7:100742849-100743039@@SERPINE1_2==wt
chr7	100742869	100743059	chr7:100742869-100743059@@SERPINE1_2==wt
chr7	100742889	100743079	chr7:100742889-100743079@@SERPINE1_2==wt
chr7	100742909	100743099	chr7:100742909-100743099@@SERPINE1_2==wt
chr7	100742929	100743119	chr7:100742929-100743119@@SERPINE1_2==wt
chr7	100742949	100743139	chr7:100742949-100743139@@SERPINE1_2==wt
chr7	100742969	100743159	chr7:100742969-100743159@@SERPINE1_2==wt
chr7	100742989	100743179	chr7:100742989-100743179@@SERPINE1_2==wt
chr7	100743009	100743199	chr7:100743009-100743199@@SERPINE1_2==wt
chr7	100743029	100743219	chr7:100743029-100743219@@SERPINE1_2==wt
chr7	100743049	100743239	chr7:100743049-100743239@@SERPINE1_2==wt
chr7	100743069	100743259	chr7:100743069-100743259@@SERPINE1_2==wt
chr7	100743089	100743279	chr7:100743089-100743279@@SERPINE1_2==wt
chr7	100743109	100743299	chr7:100743109-100743299@@SERPINE1_2==wt
chr7	100743129	100743319	chr7:100743129-100743319@@SERPINE1_2==wt
chr7	100743149	100743339	chr7:100743149-100743339@@SERPINE1_2==wt
chr7	100743169	100743359	chr7:100743169-100743359@@SERPINE1_2==wt
chr7	100743189	100743379	chr7:100743189-100743379@@SERPINE1_2==wt
chr7	100743209	100743399	chr7:100743209-100743399@@SERPINE1_2==wt
chr7	100743229	100743419	chr7:100743229-100743419@@SERPINE1_2==wt
chr7	100743249	100743439	chr7:100743249-100743439@@SERPINE1_2==wt
chr7	100743269	100743459	chr7:100743269-100743459@@SERPINE1_2==wt
chr7	100743289	100743479	chr7:100743289-100743479@@SERPINE1_2==wt
chr7	100743309	100743499	chr7:100743309-100743499@@SERPINE1_2==wt
chr7	100743329	100743519	chr7:100743329-100743519@@SERPINE1_2==wt
chr7	100743349	100743539	chr7:100743349-100743539@@SERPINE1_2==wt
chr7	100743369	100743559	chr7:100743369-100743559@@SERPINE1_2==wt
chr7	100743389	100743579	chr7:100743389-100743579@@SERPINE1_2==wt
chr7	100743409	100743599	chr7:100743409-100743599@@SERPINE1_2==wt
chr7	100743429	100743619	chr7:100743429-100743619@@SERPINE1_2==wt
chr7	100743449	100743639	chr7:100743449-100743639@@SERPINE1_2==wt
chr7	100743469	100743659	chr7:100743469-100743659@@SERPINE1_2==wt
chr7	100743489	100743679	chr7:100743489-100743679@@SERPINE1_2==wt
chr7	100743509	100743699	chr7:100743509-100743699@@SERPINE1_2==wt
chr7	100743529	100743719	chr7:100743529-100743719@@SERPINE1_2==wt
chr7	100743549	100743739	chr7:100743549-100743739@@SERPINE1_2==wt
chr7	100743569	100743759	chr7:100743569-100743759@@SERPINE1_2==wt
chr7	100764546	100764736	chr7:100764546-100764736@@SERPINE1_6==wt
chr7	100764566	100764756	chr7:100764566-100764756@@SERPINE1_6==wt
chr7	100764586	100764776	chr7:100764586-100764776@@SERPINE1_6==wt
chr7	100764606	100764796	chr7:100764606-100764796@@SERPINE1_6==wt
chr7	100764626	100764816	chr7:100764626-100764816@@SERPINE1_6==wt
chr7	100764646	100764836	chr7:100764646-100764836@@SERPINE1_6==wt
chr7	100764666	100764856	chr7:100764666-100764856@@SERPINE1_6==wt
chr7	100764686	100764876	chr7:100764686-100764876@@SERPINE1_6==wt
chr7	100764706	100764896	chr7:100764706-100764896@@SERPINE1_6==wt
chr7	100764726	100764916	chr7:100764726-100764916@@SERPINE1_6==wt
chr7	100764746	100764936	chr7:100764746-100764936@@SERPINE1_6==wt
chr7	100764766	100764956	chr7:100764766-100764956@@SERPINE1_6==wt
chr7	100764786	100764976	chr7:100764786-100764976@@SERPINE1_6==wt
chr7	100764806	100764996	chr7:100764806-100764996@@SERPINE1_6==wt
chr7	100764826	100765016	chr7:100764826-100765016@@SERPINE1_6==wt
chr7	100764846	100765036	chr7:100764846-100765036@@SERPINE1_6==wt
chr7	100764866	100765056	chr7:100764866-100765056@@SERPINE1_6==wt
chr7	100764886	100765076	chr7:100764886-100765076@@SERPINE1_6==wt
chr7	100764906	100765096	chr7:100764906-100765096@@SERPINE1_6==wt
chr7	100764926	100765116	chr7:100764926-100765116@@SERPINE1_6==wt
chr7	100764946	100765136	chr7:100764946-100765136@@SERPINE1_6==wt
chr7	100764966	100765156	chr7:100764966-100765156@@SERPINE1_6==wt
chr7	100764986	100765176	chr7:100764986-100765176@@SERPINE1_6==wt
chr7	100765006	100765196	chr7:100765006-100765196@@SERPINE1_6==wt
chr7	100765026	100765216	chr7:100765026-100765216@@SERPINE1_6==wt
chr7	100765046	100765236	chr7:100765046-100765236@@SERPINE1_6==wt
chr7	100765066	100765256	chr7:100765066-100765256@@SERPINE1_6==wt
chr7	100765086	100765276	chr7:100765086-100765276@@SERPINE1_6==wt
chr7	100765106	100765296	chr7:100765106-100765296@@SERPINE1_6==wt
chr7	100765126	100765316	chr7:100765126-100765316@@SERPINE1_6==wt
chr7	100765146	100765336	chr7:100765146-100765336@@SERPINE1_6==wt
chr7	100765166	100765356	chr7:100765166-100765356@@SERPINE1_6==wt
chr7	100765186	100765376	chr7:100765186-100765376@@SERPINE1_6==mut_cisbp_M5907_chr7
chr7	100765206	100765396	chr7:100765206-100765396@@SERPINE1_6==mut_cisbp_M5907_chr7
chr7	100765226	100765416	chr7:100765226-100765416@@SERPINE1_6==mut_cisbp_M5907_chr7
chr7	100765246	100765436	chr7:100765246-100765436@@SERPINE1_6==mut_cisbp_M5907_chr7
chr7	100765266	100765456	chr7:100765266-100765456@@SERPINE1_6==mut_cisbp_M5907_chr7
chr7	100765286	100765476	chr7:100765286-100765476@@SERPINE1_6==mut_cisbp_M5907_chr7
chr7	100765306	100765496	chr7:100765306-100765496@@SERPINE1_6==mut_cisbp_M5907_chr7
chr7	100765326	100765516	chr7:100765326-100765516@@SERPINE1_6==mut_cisbp_M5907_chr7
chr7	100765346	100765536	chr7:100765346-100765536@@SERPINE1_6==mut_cisbp_M5907_chr7
chr7	100765366	100765556	chr7:100765366-100765556@@SERPINE1_6==mut_cisbp_M5907_chr7
chr7	100765386	100765576	chr7:100765386-100765576@@SERPINE1_6==wt
chr7	100765406	100765596	chr7:100765406-100765596@@SERPINE1_6==wt
chr7	100765426	100765616	chr7:100765426-100765616@@SERPINE1_6==wt
chr7	100765446	100765636	chr7:100765446-100765636@@SERPINE1_6==wt
chr7	100765466	100765656	chr7:100765466-100765656@@SERPINE1_6==wt
chr7	100765486	100765676	chr7:100765486-100765676@@SERPINE1_6==wt
chr7	100765506	100765696	chr7:100765506-100765696@@SERPINE1_6==wt
chr7	100765526	100765716	chr7:100765526-100765716@@SERPINE1_6==wt
chr7	100765546	100765736	chr7:100765546-100765736@@SERPINE1_6==wt
chr7	100765566	100765756	chr7:100765566-100765756@@SERPINE1_6==wt
chr7	100765586	100765776	chr7:100765586-100765776@@SERPINE1_6==wt
chr7	100765606	100765796	chr7:100765606-100765796@@SERPINE1_6==wt
chr7	100765626	100765816	chr7:100765626-100765816@@SERPINE1_6==wt
chr7	100765646	100765836	chr7:100765646-100765836@@SERPINE1_6==wt
chr7	100765666	100765856	chr7:100765666-100765856@@SERPINE1_6==wt
chr7	100765686	100765876	chr7:100765686-100765876@@SERPINE1_6==wt
chr7	100765706	100765896	chr7:100765706-100765896@@SERPINE1_6==wt
chr7	100765726	100765916	chr7:100765726-100765916@@SERPINE1_6==wt
chr7	100765746	100765936	chr7:100765746-100765936@@SERPINE1_6==wt
chr7	100765766	100765956	chr7:100765766-100765956@@SERPINE1_6==wt
chr7	100765786	100765976	chr7:100765786-100765976@@SERPINE1_6==wt
chr7	100765806	100765996	chr7:100765806-100765996@@SERPINE1_6==wt
chr7	100765826	100766016	chr7:100765826-100766016@@SERPINE1_6==wt
chr7	100765846	100766036	chr7:100765846-100766036@@SERPINE1_6==wt
chr7	100765866	100766056	chr7:100765866-100766056@@SERPINE1_6==wt
chr7	100765886	100766076	chr7:100765886-100766076@@SERPINE1_6==wt
chr7	100765906	100766096	chr7:100765906-100766096@@SERPINE1_6==wt
chr7	100765926	100766116	chr7:100765926-100766116@@SERPINE1_6==wt
chr7	100765946	100766136	chr7:100765946-100766136@@SERPINE1_6==wt
chr7	100765966	100766156	chr7:100765966-100766156@@SERPINE1_6==wt
chr7	100765986	100766176	chr7:100765986-100766176@@SERPINE1_6==wt
chr7	100766006	100766196	chr7:100766006-100766196@@SERPINE1_6==wt
chr7	100766026	100766216	chr7:100766026-100766216@@SERPINE1_6==wt
chr7	100766046	100766236	chr7:100766046-100766236@@SERPINE1_6==wt
chr7	100766066	100766256	chr7:100766066-100766256@@SERPINE1_6==wt
chr7	100766086	100766276	chr7:100766086-100766276@@SERPINE1_6==wt
chr7	100766106	100766296	chr7:100766106-100766296@@SERPINE1_6==wt
chr7	100766126	100766316	chr7:100766126-100766316@@SERPINE1_6==wt
chr7	100766146	100766336	chr7:100766146-100766336@@SERPINE1_6==wt
chr7	128466920	128467110	chr7:128466920-128467110@@FLNC_1==wt
chr7	128466940	128467130	chr7:128466940-128467130@@FLNC_1==mut_cisbp_M5907_chr7
chr7	128466960	128467150	chr7:128466960-128467150@@FLNC_1==mut_cisbp_M5907_chr7
chr7	128466980	128467170	chr7:128466980-128467170@@FLNC_1==mut_cisbp_M5907_chr7
chr7	128467000	128467190	chr7:128467000-128467190@@FLNC_1==mut_cisbp_M5907_chr7
chr7	128467020	128467210	chr7:128467020-128467210@@FLNC_1==mut_cisbp_M5907_chr7
chr7	128467040	128467230	chr7:128467040-128467230@@FLNC_1==mut_cisbp_M5907_chr7
chr7	128467060	128467250	chr7:128467060-128467250@@FLNC_1==mut_cisbp_M5907_chr7
chr7	128467080	128467270	chr7:128467080-128467270@@FLNC_1==mut_cisbp_M5907_chr7
chr7	128467100	128467290	chr7:128467100-128467290@@FLNC_1==mut_cisbp_M5907_chr7
chr7	128467120	128467310	chr7:128467120-128467310@@FLNC_1==mut_cisbp_M5907_chr7
chr7	128467140	128467330	chr7:128467140-128467330@@FLNC_1==mut_cisbp_M5907_chr7
chr7	128467160	128467350	chr7:128467160-128467350@@FLNC_1==wt
chr7	128467180	128467370	chr7:128467180-128467370@@FLNC_1==wt
chr7	128467200	128467390	chr7:128467200-128467390@@FLNC_1==wt
chr7	128467220	128467410	chr7:128467220-128467410@@FLNC_1==wt
chr7	128467240	128467430	chr7:128467240-128467430@@FLNC_1==wt
chr7	128467260	128467450	chr7:128467260-128467450@@FLNC_1==wt
chr7	128467280	128467470	chr7:128467280-128467470@@FLNC_1==wt
chr7	128467300	128467490	chr7:128467300-128467490@@FLNC_1==wt
chr7	128467320	128467510	chr7:128467320-128467510@@FLNC_1==wt
chr7	128467340	128467530	chr7:128467340-128467530@@FLNC_1==wt
chr7	128467360	128467550	chr7:128467360-128467550@@FLNC_1==wt
chr7	128467380	128467570	chr7:128467380-128467570@@FLNC_1==wt
chr7	128467400	128467590	chr7:128467400-128467590@@FLNC_1==wt
chr7	128467420	128467610	chr7:128467420-128467610@@FLNC_1==wt
chr7	128467440	128467630	chr7:128467440-128467630@@FLNC_1==wt
chr7	128467460	128467650	chr7:128467460-128467650@@FLNC_1==wt
chr7	128467480	128467670	chr7:128467480-128467670@@FLNC_1==wt
chr7	128467500	128467690	chr7:128467500-128467690@@FLNC_1==wt
chr7	128467520	128467710	chr7:128467520-128467710@@FLNC_1==wt
chr7	128467540	128467730	chr7:128467540-128467730@@FLNC_1==wt
chr7	128467560	128467750	chr7:128467560-128467750@@FLNC_1==wt
chr7	128467580	128467770	chr7:128467580-128467770@@FLNC_1==wt
chr7	128467600	128467790	chr7:128467600-128467790@@FLNC_1==wt
chr7	128467620	128467810	chr7:128467620-128467810@@FLNC_1==wt
chr7	128467640	128467830	chr7:128467640-128467830@@FLNC_1==wt
chr7	128467660	128467850	chr7:128467660-128467850@@FLNC_1==wt
chr7	128467680	128467870	chr7:128467680-128467870@@FLNC_1==wt
chr7	128467700	128467890	chr7:128467700-128467890@@FLNC_1==wt
chr7	128467720	128467910	chr7:128467720-128467910@@FLNC_1==wt
chr7	128467740	128467930	chr7:128467740-128467930@@FLNC_1==wt
chr7	128467760	128467950	chr7:128467760-128467950@@FLNC_1==wt
chr7	128467780	128467970	chr7:128467780-128467970@@FLNC_1==wt
chr7	128467800	128467990	chr7:128467800-128467990@@FLNC_1==wt
chr7	128467820	128468010	chr7:128467820-128468010@@FLNC_1==wt
chr7	128467840	128468030	chr7:128467840-128468030@@FLNC_1==wt
chr7	128467860	128468050	chr7:128467860-128468050@@FLNC_1==wt
chr7	128467880	128468070	chr7:128467880-128468070@@FLNC_1==wt
chr7	128467900	128468090	chr7:128467900-128468090@@FLNC_1==wt
chr7	128467920	128468110	chr7:128467920-128468110@@FLNC_1==wt
chr7	128467940	128468130	chr7:128467940-128468130@@FLNC_1==wt
chr7	128467960	128468150	chr7:128467960-128468150@@FLNC_1==wt
chr7	128467980	128468170	chr7:128467980-128468170@@FLNC_1==wt
chr7	128468000	128468190	chr7:128468000-128468190@@FLNC_1==wt
chr7	128468020	128468210	chr7:128468020-128468210@@FLNC_1==wt
chr7	128468040	128468230	chr7:128468040-128468230@@FLNC_1==wt
chr7	128468060	128468250	chr7:128468060-128468250@@FLNC_1==wt
chr7	128468080	128468270	chr7:128468080-128468270@@FLNC_1==wt
chr7	128468100	128468290	chr7:128468100-128468290@@FLNC_1==wt
chr7	128468120	128468310	chr7:128468120-128468310@@FLNC_1==wt
chr7	128468140	128468330	chr7:128468140-128468330@@FLNC_1==wt
chr7	128468160	128468350	chr7:128468160-128468350@@FLNC_1==wt
chr7	128468180	128468370	chr7:128468180-128468370@@FLNC_1==wt
chr7	128468200	128468390	chr7:128468200-128468390@@FLNC_1==wt
chr7	128468220	128468410	chr7:128468220-128468410@@FLNC_1==wt
chr7	128468240	128468430	chr7:128468240-128468430@@FLNC_1==wt
chr7	128468260	128468450	chr7:128468260-128468450@@FLNC_1==wt
chr7	128468280	128468470	chr7:128468280-128468470@@FLNC_1==wt
chr7	128468300	128468490	chr7:128468300-128468490@@FLNC_1==wt
chr7	128468320	128468510	chr7:128468320-128468510@@FLNC_1==wt
chr7	128468340	128468530	chr7:128468340-128468530@@FLNC_1==wt
chr7	128468360	128468550	chr7:128468360-128468550@@FLNC_1==wt
chr7	128468380	128468570	chr7:128468380-128468570@@FLNC_1==wt
chr7	128468400	128468590	chr7:128468400-128468590@@FLNC_1==wt
chr7	128468420	128468610	chr7:128468420-128468610@@FLNC_1==wt
chr7	128468440	128468630	chr7:128468440-128468630@@FLNC_1==wt
chr7	128468460	128468650	chr7:128468460-128468650@@FLNC_1==wt
chr7	128468480	128468670	chr7:128468480-128468670@@FLNC_1==wt
chr7	128468500	128468690	chr7:128468500-128468690@@FLNC_1==wt
chr7	128468520	128468710	chr7:128468520-128468710@@FLNC_1==wt
chr7	128468540	128468730	chr7:128468540-128468730@@FLNC_1==wt
chr7	128468560	128468750	chr7:128468560-128468750@@FLNC_1==wt
chr7	128468580	128468770	chr7:128468580-128468770@@FLNC_1==wt
chr7	128468600	128468790	chr7:128468600-128468790@@FLNC_1==wt
chr7	128468620	128468810	chr7:128468620-128468810@@FLNC_1==wt
chr7	128468640	128468830	chr7:128468640-128468830@@FLNC_1==wt
chr7	128468660	128468850	chr7:128468660-128468850@@FLNC_1==wt
chr7	128468680	128468870	chr7:128468680-128468870@@FLNC_1==wt
chr7	128468700	128468890	chr7:128468700-128468890@@FLNC_1==wt
chr7	128468720	128468910	chr7:128468720-128468910@@FLNC_1==wt
chr7	128468740	128468930	chr7:128468740-128468930@@FLNC_1==wt
chr7	128468760	128468950	chr7:128468760-128468950@@FLNC_1==wt
chr7	128468780	128468970	chr7:128468780-128468970@@FLNC_1==wt
chr7	128470197	128470387	chr7:128470197-128470387@@FLNC_3==mut_cisbp_M5907_chr7
chr7	128470217	128470407	chr7:128470217-128470407@@FLNC_3==mut_cisbp_M5907_chr7
chr7	128470237	128470427	chr7:128470237-128470427@@FLNC_3==mut_cisbp_M5907_chr7
chr7	128470257	128470447	chr7:128470257-128470447@@FLNC_3==mut_cisbp_M5907_chr7
chr7	128470277	128470467	chr7:128470277-128470467@@FLNC_3==mut_cisbp_M5907_chr7
chr7	128470297	128470487	chr7:128470297-128470487@@FLNC_3==mut_cisbp_M5907_chr7
chr7	128470317	128470507	chr7:128470317-128470507@@FLNC_3==mut_cisbp_M5907_chr7
chr7	128470337	128470527	chr7:128470337-128470527@@FLNC_3==mut_cisbp_M5907_chr7
chr7	128470357	128470547	chr7:128470357-128470547@@FLNC_3==mut_cisbp_M5907_chr7
chr7	128470377	128470567	chr7:128470377-128470567@@FLNC_3==wt
chr7	128470397	128470587	chr7:128470397-128470587@@FLNC_3==wt
chr7	128470417	128470607	chr7:128470417-128470607@@FLNC_3==wt
chr7	128470437	128470627	chr7:128470437-128470627@@FLNC_3==wt
chr7	128470457	128470647	chr7:128470457-128470647@@FLNC_3==wt
chr7	128470477	128470667	chr7:128470477-128470667@@FLNC_3==wt
chr7	128470497	128470687	chr7:128470497-128470687@@FLNC_3==wt
chr7	128470517	128470707	chr7:128470517-128470707@@FLNC_3==wt
chr7	128470537	128470727	chr7:128470537-128470727@@FLNC_3==wt
chr7	128470557	128470747	chr7:128470557-128470747@@FLNC_3==wt
chr7	128470577	128470767	chr7:128470577-128470767@@FLNC_3==wt
chr7	128470597	128470787	chr7:128470597-128470787@@FLNC_3==wt
chr7	128470617	128470807	chr7:128470617-128470807@@FLNC_3==wt
chr7	128470637	128470827	chr7:128470637-128470827@@FLNC_3==wt
chr7	128470657	128470847	chr7:128470657-128470847@@FLNC_3==wt
chr7	128470677	128470867	chr7:128470677-128470867@@FLNC_3==wt
chr7	128470697	128470887	chr7:128470697-128470887@@FLNC_3==wt
chr7	128470717	128470907	chr7:128470717-128470907@@FLNC_3==wt
chr7	128470737	128470927	chr7:128470737-128470927@@FLNC_3==wt
chr7	128470757	128470947	chr7:128470757-128470947@@FLNC_3==wt
chr7	128470777	128470967	chr7:128470777-128470967@@FLNC_3==wt
chr7	128470797	128470987	chr7:128470797-128470987@@FLNC_3==wt
chr7	128470817	128471007	chr7:128470817-128471007@@FLNC_3==wt
chr7	128470837	128471027	chr7:128470837-128471027@@FLNC_3==wt
chr7	128470857	128471047	chr7:128470857-128471047@@FLNC_3==wt
chr7	128470877	128471067	chr7:128470877-128471067@@FLNC_3==wt
chr7	128470897	128471087	chr7:128470897-128471087@@FLNC_3==wt
chr7	128470917	128471107	chr7:128470917-128471107@@FLNC_3==wt
chr7	128470937	128471127	chr7:128470937-128471127@@FLNC_3==wt
chr7	128470957	128471147	chr7:128470957-128471147@@FLNC_3==wt
chr7	128470977	128471167	chr7:128470977-128471167@@FLNC_3==wt
chr7	128470997	128471187	chr7:128470997-128471187@@FLNC_3==wt
chr7	128471017	128471207	chr7:128471017-128471207@@FLNC_3==wt
chr7	128471037	128471227	chr7:128471037-128471227@@FLNC_3==wt
chr7	128471057	128471247	chr7:128471057-128471247@@FLNC_3==wt
chr7	128471077	128471267	chr7:128471077-128471267@@FLNC_3==wt
chr7	128471097	128471287	chr7:128471097-128471287@@FLNC_3==wt
chr7	128471117	128471307	chr7:128471117-128471307@@FLNC_3==wt
chr7	128471137	128471327	chr7:128471137-128471327@@FLNC_3==wt
chr7	128471157	128471347	chr7:128471157-128471347@@FLNC_3==wt
chr7	128471177	128471367	chr7:128471177-128471367@@FLNC_3==wt
chr7	128471197	128471387	chr7:128471197-128471387@@FLNC_3==wt
chr7	128471217	128471407	chr7:128471217-128471407@@FLNC_3==wt
chr7	128471237	128471427	chr7:128471237-128471427@@FLNC_3==wt
chr7	128471257	128471447	chr7:128471257-128471447@@FLNC_3==wt
chr7	128471277	128471467	chr7:128471277-128471467@@FLNC_3==wt
chr7	128471297	128471487	chr7:128471297-128471487@@FLNC_3==wt
chr7	128471317	128471507	chr7:128471317-128471507@@FLNC_3==wt
chr7	128471337	128471527	chr7:128471337-128471527@@FLNC_3==wt
chr7	128471357	128471547	chr7:128471357-128471547@@FLNC_3==wt
chr7	128471377	128471567	chr7:128471377-128471567@@FLNC_3==wt
chr7	128471397	128471587	chr7:128471397-128471587@@FLNC_3==wt
chr7	128471417	128471607	chr7:128471417-128471607@@FLNC_3==wt
chr7	128471437	128471627	chr7:128471437-128471627@@FLNC_3==wt
chr7	128471457	128471647	chr7:128471457-128471647@@FLNC_3==wt
chr7	128471477	128471667	chr7:128471477-128471667@@FLNC_3==wt
chr7	128471497	128471687	chr7:128471497-128471687@@FLNC_3==wt
chr7	128471517	128471707	chr7:128471517-128471707@@FLNC_3==wt
chr7	128471537	128471727	chr7:128471537-128471727@@FLNC_3==wt
chr7	128471557	128471747	chr7:128471557-128471747@@FLNC_3==wt
chr7	128471577	128471767	chr7:128471577-128471767@@FLNC_3==wt
chr7	128471597	128471787	chr7:128471597-128471787@@FLNC_3==wt
chr7	128471617	128471807	chr7:128471617-128471807@@FLNC_3==wt
chr7	128471637	128471827	chr7:128471637-128471827@@FLNC_3==wt
chr7	128471657	128471847	chr7:128471657-128471847@@FLNC_3==wt
chr7	128471677	128471867	chr7:128471677-128471867@@FLNC_3==wt
chr7	128471697	128471887	chr7:128471697-128471887@@FLNC_3==wt
chr7	128471717	128471907	chr7:128471717-128471907@@FLNC_3==wt
chr7	128471737	128471927	chr7:128471737-128471927@@FLNC_3==wt
chr7	128471757	128471947	chr7:128471757-128471947@@FLNC_3==wt
chr7	128471777	128471967	chr7:128471777-128471967@@FLNC_3==wt
chr7	128471797	128471987	chr7:128471797-128471987@@FLNC_3==wt
chr7	128471817	128472007	chr7:128471817-128472007@@FLNC_3==wt
chr7	128471837	128472027	chr7:128471837-128472027@@FLNC_3==wt
chr7	128471857	128472047	chr7:128471857-128472047@@FLNC_3==wt
chr7	128471877	128472067	chr7:128471877-128472067@@FLNC_3==wt
chr7	128471897	128472087	chr7:128471897-128472087@@FLNC_3==wt
chr7	128471917	128472107	chr7:128471917-128472107@@FLNC_3==wt
chr7	128471937	128472127	chr7:128471937-128472127@@FLNC_3==wt
chr7	128471957	128472147	chr7:128471957-128472147@@FLNC_3==wt
chr7	128471977	128472167	chr7:128471977-128472167@@FLNC_3==wt
chr7	128471997	128472187	chr7:128471997-128472187@@FLNC_3==wt
chr7	128472017	128472207	chr7:128472017-128472207@@FLNC_3==wt
chr7	128472037	128472227	chr7:128472037-128472227@@FLNC_3==wt
chr7	128472057	128472247	chr7:128472057-128472247@@FLNC_3==wt
chr7	128472077	128472267	chr7:128472077-128472267@@FLNC_3==wt
chr7	128472097	128472287	chr7:128472097-128472287@@FLNC_3==wt
chr7	128472117	128472307	chr7:128472117-128472307@@FLNC_3==wt
chr7	128472137	128472327	chr7:128472137-128472327@@FLNC_3==wt
chr7	128472157	128472347	chr7:128472157-128472347@@FLNC_3==wt
chr7	128472177	128472367	chr7:128472177-128472367@@FLNC_3==wt
chr7	128472197	128472387	chr7:128472197-128472387@@FLNC_3==wt
chr7	128472217	128472407	chr7:128472217-128472407@@FLNC_3==wt
chr7	128472237	128472427	chr7:128472237-128472427@@FLNC_3==wt
chr7	128472257	128472447	chr7:128472257-128472447@@FLNC_3==wt
chr8	11331334	11331524	chr8:11331334-11331524@@BLK_1==wt
chr8	11331354	11331544	chr8:11331354-11331544@@BLK_1==wt
chr8	11331374	11331564	chr8:11331374-11331564@@BLK_1==wt
chr8	11331394	11331584	chr8:11331394-11331584@@BLK_1==wt
chr8	11331414	11331604	chr8:11331414-11331604@@BLK_1==wt
chr8	11331434	11331624	chr8:11331434-11331624@@BLK_1==wt
chr8	11331454	11331644	chr8:11331454-11331644@@BLK_1==wt
chr8	11331474	11331664	chr8:11331474-11331664@@BLK_1==wt
chr8	11331494	11331684	chr8:11331494-11331684@@BLK_1==wt
chr8	11331514	11331704	chr8:11331514-11331704@@BLK_1==wt
chr8	11331534	11331724	chr8:11331534-11331724@@BLK_1==wt
chr8	11331554	11331744	chr8:11331554-11331744@@BLK_1==wt
chr8	11331574	11331764	chr8:11331574-11331764@@BLK_1==wt
chr8	11331594	11331784	chr8:11331594-11331784@@BLK_1==wt
[truncated: 5,394 more rows]

## Sheet: SOX10-KD library
Chromosome	Start	End	Name
chr16	14356744	14356934	chr16:14356744-14356934@@Human_restTopic11_1
chr16	14356864	14357054	chr16:14356864-14357054@@Human_restTopic11_1
chr16	14356984	14357174	chr16:14356984-14357174@@Human_restTopic11_1
chr16	14357104	14357294	chr16:14357104-14357294@@Human_restTopic11_1
chr16	14357136	14357326	chr16:14357136-14357326@@Human_restTopic11_1
chr1	185379008	185379198	chr1:185379008-185379198@@Human_restTopic11_10
chr1	185379128	185379318	chr1:185379128-185379318@@Human_restTopic11_10
chr1	185379248	185379438	chr1:185379248-185379438@@Human_restTopic11_10
chr1	185379368	185379558	chr1:185379368-185379558@@Human_restTopic11_10
chr1	185379430	185379620	chr1:185379430-185379620@@Human_restTopic11_10
chr11	15474867	15475057	chr11:15474867-15475057@@Human_restTopic11_100
chr11	15474987	15475177	chr11:15474987-15475177@@Human_restTopic11_100
chr11	15475107	15475297	chr11:15475107-15475297@@Human_restTopic11_100
chr11	15475191	15475381	chr11:15475191-15475381@@Human_restTopic11_100
chr15	52505405	52505595	chr15:52505405-52505595@@Human_restTopic11_1000
chr15	52505525	52505715	chr15:52505525-52505715@@Human_restTopic11_1000
chr15	52505613	52505803	chr15:52505613-52505803@@Human_restTopic11_1000
chr16	76710301	76710491	chr16:76710301-76710491@@Human_restTopic11_1001
chr16	76710421	76710611	chr16:76710421-76710611@@Human_restTopic11_1001
chr16	76710541	76710731	chr16:76710541-76710731@@Human_restTopic11_1001
chr16	76710568	76710758	chr16:76710568-76710758@@Human_restTopic11_1001
chr15	68972395	68972585	chr15:68972395-68972585@@Human_restTopic11_1002
chr15	68972515	68972705	chr15:68972515-68972705@@Human_restTopic11_1002
chr15	68972635	68972825	chr15:68972635-68972825@@Human_restTopic11_1002
chr15	68972670	68972860	chr15:68972670-68972860@@Human_restTopic11_1002
chr11	61717633	61717823	chr11:61717633-61717823@@Human_restTopic11_1003
chr11	61717679	61717869	chr11:61717679-61717869@@Human_restTopic11_1003
chr1	219934836	219935026	chr1:219934836-219935026@@Human_restTopic11_1004
chr1	219934956	219935146	chr1:219934956-219935146@@Human_restTopic11_1004
chr1	219935038	219935228	chr1:219935038-219935228@@Human_restTopic11_1004
chr6	10434515	10434705	chr6:10434515-10434705@@Human_restTopic11_1005
chr6	10434635	10434825	chr6:10434635-10434825@@Human_restTopic11_1005
chr6	10434755	10434945	chr6:10434755-10434945@@Human_restTopic11_1005
chr6	10434875	10435065	chr6:10434875-10435065@@Human_restTopic11_1005
chr6	10434995	10435185	chr6:10434995-10435185@@Human_restTopic11_1005
chr6	10435100	10435290	chr6:10435100-10435290@@Human_restTopic11_1005
chr15	44394841	44395031	chr15:44394841-44395031@@Human_restTopic11_1006
chr15	44394961	44395151	chr15:44394961-44395151@@Human_restTopic11_1006
chr15	44395081	44395271	chr15:44395081-44395271@@Human_restTopic11_1006
chr15	44395201	44395391	chr15:44395201-44395391@@Human_restTopic11_1006
chr15	44395257	44395447	chr15:44395257-44395447@@Human_restTopic11_1006
chr12	110609446	110609636	chr12:110609446-110609636@@Human_restTopic11_1007
chr12	110609566	110609756	chr12:110609566-110609756@@Human_restTopic11_1007
chr12	110609662	110609852	chr12:110609662-110609852@@Human_restTopic11_1007
chr1	222220735	222220925	chr1:222220735-222220925@@Human_restTopic11_1008
chr1	222220848	222221038	chr1:222220848-222221038@@Human_restTopic11_1008
chr9	109479737	109479927	chr9:109479737-109479927@@Human_restTopic11_1009
chr9	109479857	109480047	chr9:109479857-109480047@@Human_restTopic11_1009
chr9	109479977	109480167	chr9:109479977-109480167@@Human_restTopic11_1009
chr9	109480080	109480270	chr9:109480080-109480270@@Human_restTopic11_1009
chr1	234663943	234664133	chr1:234663943-234664133@@Human_restTopic11_101
chr1	234664063	234664253	chr1:234664063-234664253@@Human_restTopic11_101
chr1	234664183	234664373	chr1:234664183-234664373@@Human_restTopic11_101
chr1	234664303	234664493	chr1:234664303-234664493@@Human_restTopic11_101
chr1	234664322	234664512	chr1:234664322-234664512@@Human_restTopic11_101
chr5	149720491	149720681	chr5:149720491-149720681@@Human_restTopic11_1010
chr5	149720611	149720801	chr5:149720611-149720801@@Human_restTopic11_1010
chr5	149720649	149720839	chr5:149720649-149720839@@Human_restTopic11_1010
chr21	33750390	33750580	chr21:33750390-33750580@@Human_restTopic11_1011
chr21	33750464	33750654	chr21:33750464-33750654@@Human_restTopic11_1011
chr3	40166366	40166556	chr3:40166366-40166556@@Human_restTopic11_1012
chr3	40166486	40166676	chr3:40166486-40166676@@Human_restTopic11_1012
chr3	40166524	40166714	chr3:40166524-40166714@@Human_restTopic11_1012
chr10	75127970	75128160	chr10:75127970-75128160@@Human_restTopic11_1013
chr10	75128090	75128280	chr10:75128090-75128280@@Human_restTopic11_1013
chr10	75128117	75128307	chr10:75128117-75128307@@Human_restTopic11_1013
chr7	45230893	45231083	chr7:45230893-45231083@@Human_restTopic11_1014
chr7	45231013	45231203	chr7:45231013-45231203@@Human_restTopic11_1014
chr7	45231133	45231323	chr7:45231133-45231323@@Human_restTopic11_1014
chr7	45231141	45231331	chr7:45231141-45231331@@Human_restTopic11_1014
chr1	207194525	207194715	chr1:207194525-207194715@@Human_restTopic11_1015
chr1	207194645	207194835	chr1:207194645-207194835@@Human_restTopic11_1015
chr1	207194765	207194955	chr1:207194765-207194955@@Human_restTopic11_1015
chr1	207194885	207195075	chr1:207194885-207195075@@Human_restTopic11_1015
chr1	207195005	207195195	chr1:207195005-207195195@@Human_restTopic11_1015
chr1	207195032	207195222	chr1:207195032-207195222@@Human_restTopic11_1015
chr20	55508076	55508266	chr20:55508076-55508266@@Human_restTopic11_1016
chr20	55508196	55508386	chr20:55508196-55508386@@Human_restTopic11_1016
chr20	55508316	55508506	chr20:55508316-55508506@@Human_restTopic11_1016
chr20	55508426	55508616	chr20:55508426-55508616@@Human_restTopic11_1016
chr10	112518611	112518801	chr10:112518611-112518801@@Human_restTopic11_1017
chr10	112518731	112518921	chr10:112518731-112518921@@Human_restTopic11_1017
chr10	112518851	112519041	chr10:112518851-112519041@@Human_restTopic11_1017
chr10	112518852	112519042	chr10:112518852-112519042@@Human_restTopic11_1017
chr16	34750824	34751014	chr16:34750824-34751014@@Human_restTopic11_1018
chr16	34750944	34751134	chr16:34750944-34751134@@Human_restTopic11_1018
chr16	34751064	34751254	chr16:34751064-34751254@@Human_restTopic11_1018
chr16	34751184	34751374	chr16:34751184-34751374@@Human_restTopic11_1018
chr16	34751304	34751494	chr16:34751304-34751494@@Human_restTopic11_1018
chr16	34751369	34751559	chr16:34751369-34751559@@Human_restTopic11_1018
chr5	146106398	146106588	chr5:146106398-146106588@@Human_restTopic11_1019
chr5	146106518	146106708	chr5:146106518-146106708@@Human_restTopic11_1019
chr5	146106638	146106828	chr5:146106638-146106828@@Human_restTopic11_1019
chr5	146106644	146106834	chr5:146106644-146106834@@Human_restTopic11_1019
chr1	114746201	114746391	chr1:114746201-114746391@@Human_restTopic11_102
chr1	114746321	114746511	chr1:114746321-114746511@@Human_restTopic11_102
chr1	114746441	114746631	chr1:114746441-114746631@@Human_restTopic11_102
chr1	114746472	114746662	chr1:114746472-114746662@@Human_restTopic11_102
chr4	85139155	85139345	chr4:85139155-85139345@@Human_restTopic11_1020
chr4	85139275	85139465	chr4:85139275-85139465@@Human_restTopic11_1020
chr4	85139301	85139491	chr4:85139301-85139491@@Human_restTopic11_1020
chr4	14927023	14927213	chr4:14927023-14927213@@Human_restTopic11_1021
chr4	14927143	14927333	chr4:14927143-14927333@@Human_restTopic11_1021
chr4	14927263	14927453	chr4:14927263-14927453@@Human_restTopic11_1021
chr4	14927347	14927537	chr4:14927347-14927537@@Human_restTopic11_1021
chr8	98364919	98365109	chr8:98364919-98365109@@Human_restTopic11_1022
chr8	98365039	98365229	chr8:98365039-98365229@@Human_restTopic11_1022
chr8	98365159	98365349	chr8:98365159-98365349@@Human_restTopic11_1022
chr8	98365202	98365392	chr8:98365202-98365392@@Human_restTopic11_1022
chr1	146813025	146813215	chr1:146813025-146813215@@Human_restTopic11_1023
chr1	146813145	146813335	chr1:146813145-146813335@@Human_restTopic11_1023
chr1	146813195	146813385	chr1:146813195-146813385@@Human_restTopic11_1023
chr9	134535856	134536046	chr9:134535856-134536046@@Human_restTopic11_1024
chr9	134535939	134536129	chr9:134535939-134536129@@Human_restTopic11_1024
chr2	102369304	102369494	chr2:102369304-102369494@@Human_restTopic11_1025
chr2	102369424	102369614	chr2:102369424-102369614@@Human_restTopic11_1025
chr2	102369544	102369734	chr2:102369544-102369734@@Human_restTopic11_1025
chr2	102369664	102369854	chr2:102369664-102369854@@Human_restTopic11_1025
chr2	102369761	102369951	chr2:102369761-102369951@@Human_restTopic11_1025
chr18	29175906	29176096	chr18:29175906-29176096@@Human_restTopic11_1026
chr18	29176026	29176216	chr18:29176026-29176216@@Human_restTopic11_1026
chr18	29176146	29176336	chr18:29176146-29176336@@Human_restTopic11_1026
chr18	29176215	29176405	chr18:29176215-29176405@@Human_restTopic11_1026
chr6	20680786	20680976	chr6:20680786-20680976@@Human_restTopic11_1027
chr6	20680906	20681096	chr6:20680906-20681096@@Human_restTopic11_1027
chr6	20681026	20681216	chr6:20681026-20681216@@Human_restTopic11_1027
chr6	20681146	20681336	chr6:20681146-20681336@@Human_restTopic11_1027
chr6	20681180	20681370	chr6:20681180-20681370@@Human_restTopic11_1027
chr10	23405523	23405713	chr10:23405523-23405713@@Human_restTopic11_1028
chr10	23405643	23405833	chr10:23405643-23405833@@Human_restTopic11_1028
chr10	23405763	23405953	chr10:23405763-23405953@@Human_restTopic11_1028
chr10	23405830	23406020	chr10:23405830-23406020@@Human_restTopic11_1028
chr2	134128681	134128871	chr2:134128681-134128871@@Human_restTopic11_1029
chr2	134128801	134128991	chr2:134128801-134128991@@Human_restTopic11_1029
chr2	134128921	134129111	chr2:134128921-134129111@@Human_restTopic11_1029
chr2	134129041	134129231	chr2:134129041-134129231@@Human_restTopic11_1029
chr2	134129152	134129342	chr2:134129152-134129342@@Human_restTopic11_1029
chr16	82031316	82031506	chr16:82031316-82031506@@Human_restTopic11_103
chr16	82031436	82031626	chr16:82031436-82031626@@Human_restTopic11_103
chr16	82031556	82031746	chr16:82031556-82031746@@Human_restTopic11_103
chr16	82031591	82031781	chr16:82031591-82031781@@Human_restTopic11_103
chr11	115587573	115587763	chr11:115587573-115587763@@Human_restTopic11_1030
chr11	115587693	115587883	chr11:115587693-115587883@@Human_restTopic11_1030
chr11	115587728	115587918	chr11:115587728-115587918@@Human_restTopic11_1030
chr2	44019717	44019907	chr2:44019717-44019907@@Human_restTopic11_1031
chr2	44019837	44020027	chr2:44019837-44020027@@Human_restTopic11_1031
chr2	44019957	44020147	chr2:44019957-44020147@@Human_restTopic11_1031
chr2	44019968	44020158	chr2:44019968-44020158@@Human_restTopic11_1031
chr6	52177217	52177407	chr6:52177217-52177407@@Human_restTopic11_1032
chr6	52177337	52177527	chr6:52177337-52177527@@Human_restTopic11_1032
chr6	52177443	52177633	chr6:52177443-52177633@@Human_restTopic11_1032
chr19	8273007	8273197	chr19:8273007-8273197@@Human_restTopic11_1033
chr19	8273127	8273317	chr19:8273127-8273317@@Human_restTopic11_1033
chr19	8273247	8273437	chr19:8273247-8273437@@Human_restTopic11_1033
chr19	8273367	8273557	chr19:8273367-8273557@@Human_restTopic11_1033
chr19	8273487	8273677	chr19:8273487-8273677@@Human_restTopic11_1033
chr19	8273607	8273797	chr19:8273607-8273797@@Human_restTopic11_1033
chr19	8273727	8273917	chr19:8273727-8273917@@Human_restTopic11_1033
chr19	8273847	8274037	chr19:8273847-8274037@@Human_restTopic11_1033
chr19	8273967	8274157	chr19:8273967-8274157@@Human_restTopic11_1033
chr19	8274087	8274277	chr19:8274087-8274277@@Human_restTopic11_1033
chr19	8274207	8274397	chr19:8274207-8274397@@Human_restTopic11_1033
chr19	8274327	8274517	chr19:8274327-8274517@@Human_restTopic11_1033
chr19	8274447	8274637	chr19:8274447-8274637@@Human_restTopic11_1033
chr19	8274567	8274757	chr19:8274567-8274757@@Human_restTopic11_1033
chr19	8274628	8274818	chr19:8274628-8274818@@Human_restTopic11_1033
chr10	126902183	126902373	chr10:126902183-126902373@@Human_restTopic11_1034
chr10	126902248	126902438	chr10:126902248-126902438@@Human_restTopic11_1034
chr14	49933731	49933921	chr14:49933731-49933921@@Human_restTopic11_1035
chr14	49933851	49934041	chr14:49933851-49934041@@Human_restTopic11_1035
chr14	49933971	49934161	chr14:49933971-49934161@@Human_restTopic11_1035
chr14	49934023	49934213	chr14:49934023-49934213@@Human_restTopic11_1035
chr20	32497393	32497583	chr20:32497393-32497583@@Human_restTopic11_1036
chr20	32497513	32497703	chr20:32497513-32497703@@Human_restTopic11_1036
chr20	32497633	32497823	chr20:32497633-32497823@@Human_restTopic11_1036
chr20	32497685	32497875	chr20:32497685-32497875@@Human_restTopic11_1036
chr4	12890736	12890926	chr4:12890736-12890926@@Human_restTopic11_1037
chr4	12890856	12891046	chr4:12890856-12891046@@Human_restTopic11_1037
chr4	12890976	12891166	chr4:12890976-12891166@@Human_restTopic11_1037
chr4	12890977	12891167	chr4:12890977-12891167@@Human_restTopic11_1037
chr1	61752679	61752869	chr1:61752679-61752869@@Human_restTopic11_1038
chr1	61752799	61752989	chr1:61752799-61752989@@Human_restTopic11_1038
chr1	61752838	61753028	chr1:61752838-61753028@@Human_restTopic11_1038
chr1	168702485	168702675	chr1:168702485-168702675@@Human_restTopic11_1039
chr1	168702605	168702795	chr1:168702605-168702795@@Human_restTopic11_1039
chr1	168702669	168702859	chr1:168702669-168702859@@Human_restTopic11_1039
chr17	70652169	70652359	chr17:70652169-70652359@@Human_restTopic11_104
chr17	70652289	70652479	chr17:70652289-70652479@@Human_restTopic11_104
chr17	70652409	70652599	chr17:70652409-70652599@@Human_restTopic11_104
chr17	70652529	70652719	chr17:70652529-70652719@@Human_restTopic11_104
chr17	70652600	70652790	chr17:70652600-70652790@@Human_restTopic11_104
chr12	110375239	110375429	chr12:110375239-110375429@@Human_restTopic11_1040
chr12	110375359	110375549	chr12:110375359-110375549@@Human_restTopic11_1040
chr12	110375479	110375669	chr12:110375479-110375669@@Human_restTopic11_1040
chr12	110375599	110375789	chr12:110375599-110375789@@Human_restTopic11_1040
chr12	110375670	110375860	chr12:110375670-110375860@@Human_restTopic11_1040
chr10	97211486	97211676	chr10:97211486-97211676@@Human_restTopic11_1041
chr10	97211606	97211796	chr10:97211606-97211796@@Human_restTopic11_1041
chr10	97211726	97211916	chr10:97211726-97211916@@Human_restTopic11_1041
chr10	97211781	97211971	chr10:97211781-97211971@@Human_restTopic11_1041
chr6	118524746	118524936	chr6:118524746-118524936@@Human_restTopic11_1042
chr6	118524866	118525056	chr6:118524866-118525056@@Human_restTopic11_1042
chr6	118524986	118525176	chr6:118524986-118525176@@Human_restTopic11_1042
chr6	118525106	118525296	chr6:118525106-118525296@@Human_restTopic11_1042
chr6	118525226	118525416	chr6:118525226-118525416@@Human_restTopic11_1042
chr6	118525280	118525470	chr6:118525280-118525470@@Human_restTopic11_1042
chr10	91128810	91129000	chr10:91128810-91129000@@Human_restTopic11_1043
chr10	91128930	91129120	chr10:91128930-91129120@@Human_restTopic11_1043
chr10	91129047	91129237	chr10:91129047-91129237@@Human_restTopic11_1043
chr1	237811435	237811625	chr1:237811435-237811625@@Human_restTopic11_1044
chr1	237811555	237811745	chr1:237811555-237811745@@Human_restTopic11_1044
chr1	237811671	237811861	chr1:237811671-237811861@@Human_restTopic11_1044
chr2	228238771	228238961	chr2:228238771-228238961@@Human_restTopic11_1045
chr2	228238891	228239081	chr2:228238891-228239081@@Human_restTopic11_1045
chr2	228238978	228239168	chr2:228238978-228239168@@Human_restTopic11_1045
chr8	95690269	95690459	chr8:95690269-95690459@@Human_restTopic11_1046
chr8	95690389	95690579	chr8:95690389-95690579@@Human_restTopic11_1046
chr8	95690509	95690699	chr8:95690509-95690699@@Human_restTopic11_1046
chr8	95690629	95690819	chr8:95690629-95690819@@Human_restTopic11_1046
chr8	95690675	95690865	chr8:95690675-95690865@@Human_restTopic11_1046
chr10	109493095	109493285	chr10:109493095-109493285@@Human_restTopic11_1047
chr10	109493215	109493405	chr10:109493215-109493405@@Human_restTopic11_1047
chr10	109493335	109493525	chr10:109493335-109493525@@Human_restTopic11_1047
chr10	109493455	109493645	chr10:109493455-109493645@@Human_restTopic11_1047
chr10	109493575	109493765	chr10:109493575-109493765@@Human_restTopic11_1047
chr10	109493676	109493866	chr10:109493676-109493866@@Human_restTopic11_1047
chr17	49221752	49221942	chr17:49221752-49221942@@Human_restTopic11_1048
chr17	49221872	49222062	chr17:49221872-49222062@@Human_restTopic11_1048
chr17	49221992	49222182	chr17:49221992-49222182@@Human_restTopic11_1048
chr17	49222112	49222302	chr17:49222112-49222302@@Human_restTopic11_1048
chr17	49222232	49222422	chr17:49222232-49222422@@Human_restTopic11_1048
chr17	49222352	49222542	chr17:49222352-49222542@@Human_restTopic11_1048
chr17	49222472	49222662	chr17:49222472-49222662@@Human_restTopic11_1048
chr17	49222592	49222782	chr17:49222592-49222782@@Human_restTopic11_1048
chr17	49222654	49222844	chr17:49222654-49222844@@Human_restTopic11_1048
chr1	49013315	49013505	chr1:49013315-49013505@@Human_restTopic11_1049
chr1	49013435	49013625	chr1:49013435-49013625@@Human_restTopic11_1049
chr1	49013458	49013648	chr1:49013458-49013648@@Human_restTopic11_1049
chr1	183937341	183937531	chr1:183937341-183937531@@Human_restTopic11_105
chr1	183937461	183937651	chr1:183937461-183937651@@Human_restTopic11_105
chr1	183937581	183937771	chr1:183937581-183937771@@Human_restTopic11_105
chr1	183937683	183937873	chr1:183937683-183937873@@Human_restTopic11_105
chr3	193973138	193973328	chr3:193973138-193973328@@Human_restTopic11_1050
chr3	193973258	193973448	chr3:193973258-193973448@@Human_restTopic11_1050
chr3	193973378	193973568	chr3:193973378-193973568@@Human_restTopic11_1050
chr3	193973498	193973688	chr3:193973498-193973688@@Human_restTopic11_1050
chr3	193973522	193973712	chr3:193973522-193973712@@Human_restTopic11_1050
chr16	8964746	8964936	chr16:8964746-8964936@@Human_restTopic11_1051
chr16	8964866	8965056	chr16:8964866-8965056@@Human_restTopic11_1051
chr16	8964986	8965176	chr16:8964986-8965176@@Human_restTopic11_1051
chr16	8965106	8965296	chr16:8965106-8965296@@Human_restTopic11_1051
chr16	8965147	8965337	chr16:8965147-8965337@@Human_restTopic11_1051
chr7	116923440	116923630	chr7:116923440-116923630@@Human_restTopic11_1052
chr7	116923560	116923750	chr7:116923560-116923750@@Human_restTopic11_1052
chr7	116923680	116923870	chr7:116923680-116923870@@Human_restTopic11_1052
chr7	116923800	116923990	chr7:116923800-116923990@@Human_restTopic11_1052
chr7	116923844	116924034	chr7:116923844-116924034@@Human_restTopic11_1052
chr5	115987984	115988174	chr5:115987984-115988174@@Human_restTopic11_1053
chr5	115988104	115988294	chr5:115988104-115988294@@Human_restTopic11_1053
chr5	115988185	115988375	chr5:115988185-115988375@@Human_restTopic11_1053
chr20	5037262	5037452	chr20:5037262-5037452@@Human_restTopic11_1054
chr20	5037382	5037572	chr20:5037382-5037572@@Human_restTopic11_1054
chr20	5037502	5037692	chr20:5037502-5037692@@Human_restTopic11_1054
chr20	5037622	5037812	chr20:5037622-5037812@@Human_restTopic11_1054
chr20	5037680	5037870	chr20:5037680-5037870@@Human_restTopic11_1054
chr1	9826850	9827040	chr1:9826850-9827040@@Human_restTopic11_1055
chr1	9826970	9827160	chr1:9826970-9827160@@Human_restTopic11_1055
chr1	9827058	9827248	chr1:9827058-9827248@@Human_restTopic11_1055
chr7	151117315	151117505	chr7:151117315-151117505@@Human_restTopic11_1056
chr7	151117435	151117625	chr7:151117435-151117625@@Human_restTopic11_1056
chr7	151117504	151117694	chr7:151117504-151117694@@Human_restTopic11_1056
chr5	94927192	94927382	chr5:94927192-94927382@@Human_restTopic11_1057
chr5	94927312	94927502	chr5:94927312-94927502@@Human_restTopic11_1057
chr5	94927432	94927622	chr5:94927432-94927622@@Human_restTopic11_1057
chr5	94927552	94927742	chr5:94927552-94927742@@Human_restTopic11_1057
chr5	94927607	94927797	chr5:94927607-94927797@@Human_restTopic11_1057
chr2	102162961	102163151	chr2:102162961-102163151@@Human_restTopic11_1058
chr2	102163081	102163271	chr2:102163081-102163271@@Human_restTopic11_1058
chr2	102163201	102163391	chr2:102163201-102163391@@Human_restTopic11_1058
chr2	102163301	102163491	chr2:102163301-102163491@@Human_restTopic11_1058
chr9	98811159	98811349	chr9:98811159-98811349@@Human_restTopic11_1059
chr9	98811279	98811469	chr9:98811279-98811469@@Human_restTopic11_1059
chr9	98811399	98811589	chr9:98811399-98811589@@Human_restTopic11_1059
chr9	98811519	98811709	chr9:98811519-98811709@@Human_restTopic11_1059
chr9	98811639	98811829	chr9:98811639-98811829@@Human_restTopic11_1059
chr9	98811759	98811949	chr9:98811759-98811949@@Human_restTopic11_1059
chr9	98811879	98812069	chr9:98811879-98812069@@Human_restTopic11_1059
chr9	98811999	98812189	chr9:98811999-98812189@@Human_restTopic11_1059
chr9	98812047	98812237	chr9:98812047-98812237@@Human_restTopic11_1059
chr1	233142107	233142297	chr1:233142107-233142297@@Human_restTopic11_106
chr1	233142227	233142417	chr1:233142227-233142417@@Human_restTopic11_106
chr1	233142347	233142537	chr1:233142347-233142537@@Human_restTopic11_106
chr1	233142467	233142657	chr1:233142467-233142657@@Human_restTopic11_106
chr1	233142509	233142699	chr1:233142509-233142699@@Human_restTopic11_106
chr5	39395176	39395366	chr5:39395176-39395366@@Human_restTopic11_1060
chr5	39395296	39395486	chr5:39395296-39395486@@Human_restTopic11_1060
chr5	39395349	39395539	chr5:39395349-39395539@@Human_restTopic11_1060
chr1	231275520	231275710	chr1:231275520-231275710@@Human_restTopic11_1061
chr1	231275640	231275830	chr1:231275640-231275830@@Human_restTopic11_1061
chr1	231275760	231275950	chr1:231275760-231275950@@Human_restTopic11_1061
chr1	231275880	231276070	chr1:231275880-231276070@@Human_restTopic11_1061
chr1	231276000	231276190	chr1:231276000-231276190@@Human_restTopic11_1061
chr1	231276088	231276278	chr1:231276088-231276278@@Human_restTopic11_1061
chr11	56468481	56468671	chr11:56468481-56468671@@Human_restTopic11_1062
chr11	56468601	56468791	chr11:56468601-56468791@@Human_restTopic11_1062
chr11	56468718	56468908	chr11:56468718-56468908@@Human_restTopic11_1062
chr1	210831155	210831345	chr1:210831155-210831345@@Human_restTopic11_1063
chr1	210831275	210831465	chr1:210831275-210831465@@Human_restTopic11_1063
chr1	210831395	210831585	chr1:210831395-210831585@@Human_restTopic11_1063
chr1	210831398	210831588	chr1:210831398-210831588@@Human_restTopic11_1063
chr2	62814175	62814365	chr2:62814175-62814365@@Human_restTopic11_1064
chr2	62814266	62814456	chr2:62814266-62814456@@Human_restTopic11_1064
chr1	201430336	201430526	chr1:201430336-201430526@@Human_restTopic11_1065
chr1	201430430	201430620	chr1:201430430-201430620@@Human_restTopic11_1065
chr11	12185630	12185820	chr11:12185630-12185820@@Human_restTopic11_1066
chr11	12185750	12185940	chr11:12185750-12185940@@Human_restTopic11_1066
chr11	12185870	12186060	chr11:12185870-12186060@@Human_restTopic11_1066
chr11	12185930	12186120	chr11:12185930-12186120@@Human_restTopic11_1066
chr8	139532820	139533010	chr8:139532820-139533010@@Human_restTopic11_1067
chr8	139532940	139533130	chr8:139532940-139533130@@Human_restTopic11_1067
chr8	139533060	139533250	chr8:139533060-139533250@@Human_restTopic11_1067
chr8	139533180	139533370	chr8:139533180-139533370@@Human_restTopic11_1067
chr8	139533241	139533431	chr8:139533241-139533431@@Human_restTopic11_1067
chr20	55561973	55562163	chr20:55561973-55562163@@Human_restTopic11_1068
chr20	55562093	55562283	chr20:55562093-55562283@@Human_restTopic11_1068
chr20	55562213	55562403	chr20:55562213-55562403@@Human_restTopic11_1068
chr20	55562333	55562523	chr20:55562333-55562523@@Human_restTopic11_1068
chr20	55562453	55562643	chr20:55562453-55562643@@Human_restTopic11_1068
chr20	55562470	55562660	chr20:55562470-55562660@@Human_restTopic11_1068
chr13	76954736	76954926	chr13:76954736-76954926@@Human_restTopic11_1069
chr13	76954856	76955046	chr13:76954856-76955046@@Human_restTopic11_1069
chr13	76954976	76955166	chr13:76954976-76955166@@Human_restTopic11_1069
chr13	76955096	76955286	chr13:76955096-76955286@@Human_restTopic11_1069
chr13	76955216	76955406	chr13:76955216-76955406@@Human_restTopic11_1069
chr13	76955223	76955413	chr13:76955223-76955413@@Human_restTopic11_1069
chr3	22623622	22623812	chr3:22623622-22623812@@Human_restTopic11_107
chr3	22623742	22623932	chr3:22623742-22623932@@Human_restTopic11_107
chr3	22623862	22624052	chr3:22623862-22624052@@Human_restTopic11_107
chr3	22623982	22624172	chr3:22623982-22624172@@Human_restTopic11_107
chr4	130175185	130175375	chr4:130175185-130175375@@Human_restTopic11_1070
chr4	130175305	130175495	chr4:130175305-130175495@@Human_restTopic11_1070
chr4	130175425	130175615	chr4:130175425-130175615@@Human_restTopic11_1070
chr4	130175545	130175735	chr4:130175545-130175735@@Human_restTopic11_1070
chr4	130175665	130175855	chr4:130175665-130175855@@Human_restTopic11_1070
chr4	130175785	130175975	chr4:130175785-130175975@@Human_restTopic11_1070
chr4	130175789	130175979	chr4:130175789-130175979@@Human_restTopic11_1070
chr21	15693169	15693359	chr21:15693169-15693359@@Human_restTopic11_1071
chr21	15693289	15693479	chr21:15693289-15693479@@Human_restTopic11_1071
chr21	15693409	15693599	chr21:15693409-15693599@@Human_restTopic11_1071
chr21	15693473	15693663	chr21:15693473-15693663@@Human_restTopic11_1071
chr1	49564648	49564838	chr1:49564648-49564838@@Human_restTopic11_1072
chr1	49564666	49564856	chr1:49564666-49564856@@Human_restTopic11_1072
chr6	4313360	4313550	chr6:4313360-4313550@@Human_restTopic11_1073
chr6	4313480	4313670	chr6:4313480-4313670@@Human_restTopic11_1073
chr6	4313600	4313790	chr6:4313600-4313790@@Human_restTopic11_1073
chr6	4313720	4313910	chr6:4313720-4313910@@Human_restTopic11_1073
chr6	4313785	4313975	chr6:4313785-4313975@@Human_restTopic11_1073
chr6	39378975	39379165	chr6:39378975-39379165@@Human_restTopic11_108
chr6	39379095	39379285	chr6:39379095-39379285@@Human_restTopic11_108
chr6	39379215	39379405	chr6:39379215-39379405@@Human_restTopic11_108
chr6	39379335	39379525	chr6:39379335-39379525@@Human_restTopic11_108
chr6	39379439	39379629	chr6:39379439-39379629@@Human_restTopic11_108
chr1	145032219	145032409	chr1:145032219-145032409@@Human_restTopic11_109
chr1	145032339	145032529	chr1:145032339-145032529@@Human_restTopic11_109
chr1	145032459	145032649	chr1:145032459-145032649@@Human_restTopic11_109
chr1	145032579	145032769	chr1:145032579-145032769@@Human_restTopic11_109
chr1	145032699	145032889	chr1:145032699-145032889@@Human_restTopic11_109
chr1	145032726	145032916	chr1:145032726-145032916@@Human_restTopic11_109
chr3	53205063	53205253	chr3:53205063-53205253@@Human_restTopic11_11
chr3	53205177	53205367	chr3:53205177-53205367@@Human_restTopic11_11
chr2	51808991	51809181	chr2:51808991-51809181@@Human_restTopic11_110
chr2	51809111	51809301	chr2:51809111-51809301@@Human_restTopic11_110
chr2	51809231	51809421	chr2:51809231-51809421@@Human_restTopic11_110
chr2	51809268	51809458	chr2:51809268-51809458@@Human_restTopic11_110
chr6	170653873	170654063	chr6:170653873-170654063@@Human_restTopic11_111
chr6	170653993	170654183	chr6:170653993-170654183@@Human_restTopic11_111
chr6	170654113	170654303	chr6:170654113-170654303@@Human_restTopic11_111
chr6	170654233	170654423	chr6:170654233-170654423@@Human_restTopic11_111
chr6	170654256	170654446	chr6:170654256-170654446@@Human_restTopic11_111
chr6	9456348	9456538	chr6:9456348-9456538@@Human_restTopic11_112
chr6	9456468	9456658	chr6:9456468-9456658@@Human_restTopic11_112
chr6	9456588	9456778	chr6:9456588-9456778@@Human_restTopic11_112
chr6	9456708	9456898	chr6:9456708-9456898@@Human_restTopic11_112
chr6	9456710	9456900	chr6:9456710-9456900@@Human_restTopic11_112
chr12	24909516	24909706	chr12:24909516-24909706@@Human_restTopic11_113
chr12	24909636	24909826	chr12:24909636-24909826@@Human_restTopic11_113
chr12	24909756	24909946	chr12:24909756-24909946@@Human_restTopic11_113
chr12	24909876	24910066	chr12:24909876-24910066@@Human_restTopic11_113
chr12	24909935	24910125	chr12:24909935-24910125@@Human_restTopic11_113
chr14	105385680	105385870	chr14:105385680-105385870@@Human_restTopic11_114
chr14	105385800	105385990	chr14:105385800-105385990@@Human_restTopic11_114
chr14	105385920	105386110	chr14:105385920-105386110@@Human_restTopic11_114
chr14	105386040	105386230	chr14:105386040-105386230@@Human_restTopic11_114
chr14	105386160	105386350	chr14:105386160-105386350@@Human_restTopic11_114
chr14	105386280	105386470	chr14:105386280-105386470@@Human_restTopic11_114
chr14	105386400	105386590	chr14:105386400-105386590@@Human_restTopic11_114
chr14	105386425	105386615	chr14:105386425-105386615@@Human_restTopic11_114
chr10	100125528	100125718	chr10:100125528-100125718@@Human_restTopic11_115
chr10	100125648	100125838	chr10:100125648-100125838@@Human_restTopic11_115
chr10	100125768	100125958	chr10:100125768-100125958@@Human_restTopic11_115
chr10	100125888	100126078	chr10:100125888-100126078@@Human_restTopic11_115
chr10	100126008	100126198	chr10:100126008-100126198@@Human_restTopic11_115
chr10	100126036	100126226	chr10:100126036-100126226@@Human_restTopic11_115
chr6	1164742	1164932	chr6:1164742-1164932@@Human_restTopic11_116
chr6	1164862	1165052	chr6:1164862-1165052@@Human_restTopic11_116
chr6	1164982	1165172	chr6:1164982-1165172@@Human_restTopic11_116
chr6	1165082	1165272	chr6:1165082-1165272@@Human_restTopic11_116
chr1	206853346	206853536	chr1:206853346-206853536@@Human_restTopic11_117
chr1	206853466	206853656	chr1:206853466-206853656@@Human_restTopic11_117
chr1	206853586	206853776	chr1:206853586-206853776@@Human_restTopic11_117
chr1	206853706	206853896	chr1:206853706-206853896@@Human_restTopic11_117
chr1	206853789	206853979	chr1:206853789-206853979@@Human_restTopic11_117
chr22	34367589	34367779	chr22:34367589-34367779@@Human_restTopic11_118
chr22	34367709	34367899	chr22:34367709-34367899@@Human_restTopic11_118
chr22	34367829	34368019	chr22:34367829-34368019@@Human_restTopic11_118
chr22	34367922	34368112	chr22:34367922-34368112@@Human_restTopic11_118
chr3	187842020	187842210	chr3:187842020-187842210@@Human_restTopic11_119
chr3	187842140	187842330	chr3:187842140-187842330@@Human_restTopic11_119
chr3	187842260	187842450	chr3:187842260-187842450@@Human_restTopic11_119
chr3	187842380	187842570	chr3:187842380-187842570@@Human_restTopic11_119
chr3	187842500	187842690	chr3:187842500-187842690@@Human_restTopic11_119
chr3	187842562	187842752	chr3:187842562-187842752@@Human_restTopic11_119
chr2	122325530	122325720	chr2:122325530-122325720@@Human_restTopic11_12
chr2	122325650	122325840	chr2:122325650-122325840@@Human_restTopic11_12
chr2	122325770	122325960	chr2:122325770-122325960@@Human_restTopic11_12
chr2	122325890	122326080	chr2:122325890-122326080@@Human_restTopic11_12
chr2	122325986	122326176	chr2:122325986-122326176@@Human_restTopic11_12
chr17	17655553	17655743	chr17:17655553-17655743@@Human_restTopic11_120
chr17	17655673	17655863	chr17:17655673-17655863@@Human_restTopic11_120
chr17	17655793	17655983	chr17:17655793-17655983@@Human_restTopic11_120
chr17	17655913	17656103	chr17:17655913-17656103@@Human_restTopic11_120
chr17	17656033	17656223	chr17:17656033-17656223@@Human_restTopic11_120
chr17	17656153	17656343	chr17:17656153-17656343@@Human_restTopic11_120
chr17	17656273	17656463	chr17:17656273-17656463@@Human_restTopic11_120
chr17	17656393	17656583	chr17:17656393-17656583@@Human_restTopic11_120
chr17	17656463	17656653	chr17:17656463-17656653@@Human_restTopic11_120
chr1	219652065	219652255	chr1:219652065-219652255@@Human_restTopic11_121
chr1	219652185	219652375	chr1:219652185-219652375@@Human_restTopic11_121
chr1	219652305	219652495	chr1:219652305-219652495@@Human_restTopic11_121
chr1	219652366	219652556	chr1:219652366-219652556@@Human_restTopic11_121
chr21	38574633	38574823	chr21:38574633-38574823@@Human_restTopic11_122
chr21	38574753	38574943	chr21:38574753-38574943@@Human_restTopic11_122
chr21	38574873	38575063	chr21:38574873-38575063@@Human_restTopic11_122
chr21	38574993	38575183	chr21:38574993-38575183@@Human_restTopic11_122
chr20	43786653	43786843	chr20:43786653-43786843@@Human_restTopic11_123
chr20	43786773	43786963	chr20:43786773-43786963@@Human_restTopic11_123
chr20	43786893	43787083	chr20:43786893-43787083@@Human_restTopic11_123
chr20	43786899	43787089	chr20:43786899-43787089@@Human_restTopic11_123
chr7	5739076	5739266	chr7:5739076-5739266@@Human_restTopic11_124
chr7	5739196	5739386	chr7:5739196-5739386@@Human_restTopic11_124
chr7	5739316	5739506	chr7:5739316-5739506@@Human_restTopic11_124
chr7	5739436	5739626	chr7:5739436-5739626@@Human_restTopic11_124
chr7	5739556	5739746	chr7:5739556-5739746@@Human_restTopic11_124
chr7	5739582	5739772	chr7:5739582-5739772@@Human_restTopic11_124
chr11	126280310	126280500	chr11:126280310-126280500@@Human_restTopic11_125
chr11	126280430	126280620	chr11:126280430-126280620@@Human_restTopic11_125
chr11	126280550	126280740	chr11:126280550-126280740@@Human_restTopic11_125
chr11	126280670	126280860	chr11:126280670-126280860@@Human_restTopic11_125
chr11	126280700	126280890	chr11:126280700-126280890@@Human_restTopic11_125
chr11	102595915	102596105	chr11:102595915-102596105@@Human_restTopic11_126
chr11	102596035	102596225	chr11:102596035-102596225@@Human_restTopic11_126
chr11	102596155	102596345	chr11:102596155-102596345@@Human_restTopic11_126
chr11	102596275	102596465	chr11:102596275-102596465@@Human_restTopic11_126
chr11	102596299	102596489	chr11:102596299-102596489@@Human_restTopic11_126
chr3	45654412	45654602	chr3:45654412-45654602@@Human_restTopic11_127
chr3	45654532	45654722	chr3:45654532-45654722@@Human_restTopic11_127
chr3	45654652	45654842	chr3:45654652-45654842@@Human_restTopic11_127
chr3	45654772	45654962	chr3:45654772-45654962@@Human_restTopic11_127
chr3	45654846	45655036	chr3:45654846-45655036@@Human_restTopic11_127
chr11	121108609	121108799	chr11:121108609-121108799@@Human_restTopic11_128
chr11	121108729	121108919	chr11:121108729-121108919@@Human_restTopic11_128
chr11	121108849	121109039	chr11:121108849-121109039@@Human_restTopic11_128
chr11	121108969	121109159	chr11:121108969-121109159@@Human_restTopic11_128
chr11	121109066	121109256	chr11:121109066-121109256@@Human_restTopic11_128
chr3	181469977	181470167	chr3:181469977-181470167@@Human_restTopic11_129
chr3	181470097	181470287	chr3:181470097-181470287@@Human_restTopic11_129
chr3	181470217	181470407	chr3:181470217-181470407@@Human_restTopic11_129
chr3	181470337	181470527	chr3:181470337-181470527@@Human_restTopic11_129
chr3	181470351	181470541	chr3:181470351-181470541@@Human_restTopic11_129
chr22	38060617	38060807	chr22:38060617-38060807@@Human_restTopic11_13
chr22	38060737	38060927	chr22:38060737-38060927@@Human_restTopic11_13
chr22	38060857	38061047	chr22:38060857-38061047@@Human_restTopic11_13
chr22	38060900	38061090	chr22:38060900-38061090@@Human_restTopic11_13
chr1	201303973	201304163	chr1:201303973-201304163@@Human_restTopic11_130
chr1	201304093	201304283	chr1:201304093-201304283@@Human_restTopic11_130
chr1	201304213	201304403	chr1:201304213-201304403@@Human_restTopic11_130
chr1	201304333	201304523	chr1:201304333-201304523@@Human_restTopic11_130
chr1	201304453	201304643	chr1:201304453-201304643@@Human_restTopic11_130
chr1	201304548	201304738	chr1:201304548-201304738@@Human_restTopic11_130
chr2	192030684	192030874	chr2:192030684-192030874@@Human_restTopic11_131
chr2	192030804	192030994	chr2:192030804-192030994@@Human_restTopic11_131
chr2	192030924	192031114	chr2:192030924-192031114@@Human_restTopic11_131
chr2	192030943	192031133	chr2:192030943-192031133@@Human_restTopic11_131
chr20	31898176	31898366	chr20:31898176-31898366@@Human_restTopic11_132
chr20	31898296	31898486	chr20:31898296-31898486@@Human_restTopic11_132
chr20	31898404	31898594	chr20:31898404-31898594@@Human_restTopic11_132
chr1	224947190	224947380	chr1:224947190-224947380@@Human_restTopic11_133
chr1	224947310	224947500	chr1:224947310-224947500@@Human_restTopic11_133
chr1	224947430	224947620	chr1:224947430-224947620@@Human_restTopic11_133
chr1	224947550	224947740	chr1:224947550-224947740@@Human_restTopic11_133
chr1	224947670	224947860	chr1:224947670-224947860@@Human_restTopic11_133
chr1	224947675	224947865	chr1:224947675-224947865@@Human_restTopic11_133
chr1	145717962	145718152	chr1:145717962-145718152@@Human_restTopic11_134
chr1	145718082	145718272	chr1:145718082-145718272@@Human_restTopic11_134
chr1	145718202	145718392	chr1:145718202-145718392@@Human_restTopic11_134
chr1	145718322	145718512	chr1:145718322-145718512@@Human_restTopic11_134
chr1	145718331	145718521	chr1:145718331-145718521@@Human_restTopic11_134
chr16	89790149	89790339	chr16:89790149-89790339@@Human_restTopic11_135
chr16	89790269	89790459	chr16:89790269-89790459@@Human_restTopic11_135
chr16	89790389	89790579	chr16:89790389-89790579@@Human_restTopic11_135
chr16	89790469	89790659	chr16:89790469-89790659@@Human_restTopic11_135
chr4	103563006	103563196	chr4:103563006-103563196@@Human_restTopic11_136
chr4	103563126	103563316	chr4:103563126-103563316@@Human_restTopic11_136
chr4	103563246	103563436	chr4:103563246-103563436@@Human_restTopic11_136
chr4	103563360	103563550	chr4:103563360-103563550@@Human_restTopic11_136
chr8	8468257	8468447	chr8:8468257-8468447@@Human_restTopic11_137
chr8	8468377	8468567	chr8:8468377-8468567@@Human_restTopic11_137
chr8	8468497	8468687	chr8:8468497-8468687@@Human_restTopic11_137
chr8	8468617	8468807	chr8:8468617-8468807@@Human_restTopic11_137
chr8	8468737	8468927	chr8:8468737-8468927@@Human_restTopic11_137
chr8	8468857	8469047	chr8:8468857-8469047@@Human_restTopic11_137
chr8	8468935	8469125	chr8:8468935-8469125@@Human_restTopic11_137
chr2	218579000	218579190	chr2:218579000-218579190@@Human_restTopic11_138
chr2	218579120	218579310	chr2:218579120-218579310@@Human_restTopic11_138
chr2	218579223	218579413	chr2:218579223-218579413@@Human_restTopic11_138
chr7	24865794	24865984	chr7:24865794-24865984@@Human_restTopic11_139
chr7	24865914	24866104	chr7:24865914-24866104@@Human_restTopic11_139
chr7	24866034	24866224	chr7:24866034-24866224@@Human_restTopic11_139
chr7	24866154	24866344	chr7:24866154-24866344@@Human_restTopic11_139
chr7	24866274	24866464	chr7:24866274-24866464@@Human_restTopic11_139
chr7	24866302	24866492	chr7:24866302-24866492@@Human_restTopic11_139
chr3	11489206	11489396	chr3:11489206-11489396@@Human_restTopic11_14
chr3	11489326	11489516	chr3:11489326-11489516@@Human_restTopic11_14
chr3	11489446	11489636	chr3:11489446-11489636@@Human_restTopic11_14
chr3	11489566	11489756	chr3:11489566-11489756@@Human_restTopic11_14
chr3	11489679	11489869	chr3:11489679-11489869@@Human_restTopic11_14
chr2	105910233	105910423	chr2:105910233-105910423@@Human_restTopic11_140
chr2	105910353	105910543	chr2:105910353-105910543@@Human_restTopic11_140
chr2	105910473	105910663	chr2:105910473-105910663@@Human_restTopic11_140
chr2	105910585	105910775	chr2:105910585-105910775@@Human_restTopic11_140
chr15	93144117	93144307	chr15:93144117-93144307@@Human_restTopic11_141
chr15	93144237	93144427	chr15:93144237-93144427@@Human_restTopic11_141
chr15	93144357	93144547	chr15:93144357-93144547@@Human_restTopic11_141
chr15	93144438	93144628	chr15:93144438-93144628@@Human_restTopic11_141
chr20	32533441	32533631	chr20:32533441-32533631@@Human_restTopic11_142
chr20	32533561	32533751	chr20:32533561-32533751@@Human_restTopic11_142
chr20	32533681	32533871	chr20:32533681-32533871@@Human_restTopic11_142
chr20	32533714	32533904	chr20:32533714-32533904@@Human_restTopic11_142
chr1	153736048	153736238	chr1:153736048-153736238@@Human_restTopic11_143
chr1	153736168	153736358	chr1:153736168-153736358@@Human_restTopic11_143
chr1	153736286	153736476	chr1:153736286-153736476@@Human_restTopic11_143
chr6	48396699	48396889	chr6:48396699-48396889@@Human_restTopic11_144
chr6	48396819	48397009	chr6:48396819-48397009@@Human_restTopic11_144
chr6	48396928	48397118	chr6:48396928-48397118@@Human_restTopic11_144
chr6	36325914	36326104	chr6:36325914-36326104@@Human_restTopic11_145
chr6	36326034	36326224	chr6:36326034-36326224@@Human_restTopic11_145
chr6	36326154	36326344	chr6:36326154-36326344@@Human_restTopic11_145
chr6	36326274	36326464	chr6:36326274-36326464@@Human_restTopic11_145
chr6	36326394	36326584	chr6:36326394-36326584@@Human_restTopic11_145
chr6	36326514	36326704	chr6:36326514-36326704@@Human_restTopic11_145
chr6	36326573	36326763	chr6:36326573-36326763@@Human_restTopic11_145
chr8	9106154	9106344	chr8:9106154-9106344@@Human_restTopic11_146
chr8	9106274	9106464	chr8:9106274-9106464@@Human_restTopic11_146
chr8	9106394	9106584	chr8:9106394-9106584@@Human_restTopic11_146
chr8	9106514	9106704	chr8:9106514-9106704@@Human_restTopic11_146
chr8	9106534	9106724	chr8:9106534-9106724@@Human_restTopic11_146
chr15	74827581	74827771	chr15:74827581-74827771@@Human_restTopic11_147
chr15	74827701	74827891	chr15:74827701-74827891@@Human_restTopic11_147
chr15	74827821	74828011	chr15:74827821-74828011@@Human_restTopic11_147
chr15	74827941	74828131	chr15:74827941-74828131@@Human_restTopic11_147
chr15	74828002	74828192	chr15:74828002-74828192@@Human_restTopic11_147
chr6	108323884	108324074	chr6:108323884-108324074@@Human_restTopic11_148
chr6	108324004	108324194	chr6:108324004-108324194@@Human_restTopic11_148
chr6	108324124	108324314	chr6:108324124-108324314@@Human_restTopic11_148
chr6	108324244	108324434	chr6:108324244-108324434@@Human_restTopic11_148
chr6	108324301	108324491	chr6:108324301-108324491@@Human_restTopic11_148
chr9	73195423	73195613	chr9:73195423-73195613@@Human_restTopic11_149
chr9	73195543	73195733	chr9:73195543-73195733@@Human_restTopic11_149
chr9	73195663	73195853	chr9:73195663-73195853@@Human_restTopic11_149
chr9	73195783	73195973	chr9:73195783-73195973@@Human_restTopic11_149
chr9	73195903	73196093	chr9:73195903-73196093@@Human_restTopic11_149
chr9	73196023	73196213	chr9:73196023-73196213@@Human_restTopic11_149
chr9	73196143	73196333	chr9:73196143-73196333@@Human_restTopic11_149
chr9	73196190	73196380	chr9:73196190-73196380@@Human_restTopic11_149
chr1	201419788	201419978	chr1:201419788-201419978@@Human_restTopic11_15
chr1	201419908	201420098	chr1:201419908-201420098@@Human_restTopic11_15
chr1	201420028	201420218	chr1:201420028-201420218@@Human_restTopic11_15
chr1	201420148	201420338	chr1:201420148-201420338@@Human_restTopic11_15
chr1	201420267	201420457	chr1:201420267-201420457@@Human_restTopic11_15
chr1	160064025	160064215	chr1:160064025-160064215@@Human_restTopic11_150
chr1	160064145	160064335	chr1:160064145-160064335@@Human_restTopic11_150
chr1	160064182	160064372	chr1:160064182-160064372@@Human_restTopic11_150
chr3	14909448	14909638	chr3:14909448-14909638@@Human_restTopic11_151
chr3	14909568	14909758	chr3:14909568-14909758@@Human_restTopic11_151
chr3	14909688	14909878	chr3:14909688-14909878@@Human_restTopic11_151
chr3	14909731	14909921	chr3:14909731-14909921@@Human_restTopic11_151
chr2	102141342	102141532	chr2:102141342-102141532@@Human_restTopic11_152
chr2	102141462	102141652	chr2:102141462-102141652@@Human_restTopic11_152
chr2	102141568	102141758	chr2:102141568-102141758@@Human_restTopic11_152
chr1	168060715	168060905	chr1:168060715-168060905@@Human_restTopic11_153
chr1	168060835	168061025	chr1:168060835-168061025@@Human_restTopic11_153
chr1	168060955	168061145	chr1:168060955-168061145@@Human_restTopic11_153
chr1	168061075	168061265	chr1:168061075-168061265@@Human_restTopic11_153
chr1	168061195	168061385	chr1:168061195-168061385@@Human_restTopic11_153
chr1	168061286	168061476	chr1:168061286-168061476@@Human_restTopic11_153
chr20	25013276	25013466	chr20:25013276-25013466@@Human_restTopic11_154
chr20	25013396	25013586	chr20:25013396-25013586@@Human_restTopic11_154
chr20	25013516	25013706	chr20:25013516-25013706@@Human_restTopic11_154
chr20	25013636	25013826	chr20:25013636-25013826@@Human_restTopic11_154
chr20	25013641	25013831	chr20:25013641-25013831@@Human_restTopic11_154
chr14	59408208	59408398	chr14:59408208-59408398@@Human_restTopic11_155
chr14	59408328	59408518	chr14:59408328-59408518@@Human_restTopic11_155
chr14	59408448	59408638	chr14:59408448-59408638@@Human_restTopic11_155
chr14	59408568	59408758	chr14:59408568-59408758@@Human_restTopic11_155
chr14	59408688	59408878	chr14:59408688-59408878@@Human_restTopic11_155
chr14	59408786	59408976	chr14:59408786-59408976@@Human_restTopic11_155
chr13	98300607	98300797	chr13:98300607-98300797@@Human_restTopic11_156
chr13	98300727	98300917	chr13:98300727-98300917@@Human_restTopic11_156
chr13	98300847	98301037	chr13:98300847-98301037@@Human_restTopic11_156
chr13	98300967	98301157	chr13:98300967-98301157@@Human_restTopic11_156
chr13	98301024	98301214	chr13:98301024-98301214@@Human_restTopic11_156
chr11	126570667	126570857	chr11:126570667-126570857@@Human_restTopic11_157
chr11	126570787	126570977	chr11:126570787-126570977@@Human_restTopic11_157
chr11	126570907	126571097	chr11:126570907-126571097@@Human_restTopic11_157
chr11	126571027	126571217	chr11:126571027-126571217@@Human_restTopic11_157
chr11	126571147	126571337	chr11:126571147-126571337@@Human_restTopic11_157
chr11	126571267	126571457	chr11:126571267-126571457@@Human_restTopic11_157
chr11	126571387	126571577	chr11:126571387-126571577@@Human_restTopic11_157
chr11	126571418	126571608	chr11:126571418-126571608@@Human_restTopic11_157
chr13	99880984	99881174	chr13:99880984-99881174@@Human_restTopic11_158
chr13	99881104	99881294	chr13:99881104-99881294@@Human_restTopic11_158
chr13	99881224	99881414	chr13:99881224-99881414@@Human_restTopic11_158
chr13	99881344	99881534	chr13:99881344-99881534@@Human_restTopic11_158
chr13	99881464	99881654	chr13:99881464-99881654@@Human_restTopic11_158
chr13	99881584	99881774	chr13:99881584-99881774@@Human_restTopic11_158
chr13	99881628	99881818	chr13:99881628-99881818@@Human_restTopic11_158
chr3	89635223	89635413	chr3:89635223-89635413@@Human_restTopic11_159
chr3	89635343	89635533	chr3:89635343-89635533@@Human_restTopic11_159
chr3	89635463	89635653	chr3:89635463-89635653@@Human_restTopic11_159
chr3	89635583	89635773	chr3:89635583-89635773@@Human_restTopic11_159
chr3	89635703	89635893	chr3:89635703-89635893@@Human_restTopic11_159
chr3	89635823	89636013	chr3:89635823-89636013@@Human_restTopic11_159
chr3	89635943	89636133	chr3:89635943-89636133@@Human_restTopic11_159
chr3	89635957	89636147	chr3:89635957-89636147@@Human_restTopic11_159
chr13	110745215	110745405	chr13:110745215-110745405@@Human_restTopic11_16
chr13	110745335	110745525	chr13:110745335-110745525@@Human_restTopic11_16
chr13	110745455	110745645	chr13:110745455-110745645@@Human_restTopic11_16
chr13	110745569	110745759	chr13:110745569-110745759@@Human_restTopic11_16
chr13	53353156	53353346	chr13:53353156-53353346@@Human_restTopic11_160
chr13	53353276	53353466	chr13:53353276-53353466@@Human_restTopic11_160
chr13	53353396	53353586	chr13:53353396-53353586@@Human_restTopic11_160
chr13	53353516	53353706	chr13:53353516-53353706@@Human_restTopic11_160
chr18	45438324	45438514	chr18:45438324-45438514@@Human_restTopic11_161
chr18	45438444	45438634	chr18:45438444-45438634@@Human_restTopic11_161
chr18	45438564	45438754	chr18:45438564-45438754@@Human_restTopic11_161
chr18	45438684	45438874	chr18:45438684-45438874@@Human_restTopic11_161
chr18	45438804	45438994	chr18:45438804-45438994@@Human_restTopic11_161
chr18	45438924	45439114	chr18:45438924-45439114@@Human_restTopic11_161
chr18	45439044	45439234	chr18:45439044-45439234@@Human_restTopic11_161
chr18	45439082	45439272	chr18:45439082-45439272@@Human_restTopic11_161
chr20	11454488	11454678	chr20:11454488-11454678@@Human_restTopic11_162
chr20	11454608	11454798	chr20:11454608-11454798@@Human_restTopic11_162
chr20	11454728	11454918	chr20:11454728-11454918@@Human_restTopic11_162
chr20	11454848	11455038	chr20:11454848-11455038@@Human_restTopic11_162
chr20	11454892	11455082	chr20:11454892-11455082@@Human_restTopic11_162
chr11	8244759	8244949	chr11:8244759-8244949@@Human_restTopic11_163
chr11	8244879	8245069	chr11:8244879-8245069@@Human_restTopic11_163
chr11	8244999	8245189	chr11:8244999-8245189@@Human_restTopic11_163
chr11	8245119	8245309	chr11:8245119-8245309@@Human_restTopic11_163
chr11	8245210	8245400	chr11:8245210-8245400@@Human_restTopic11_163
chr1	201631785	201631975	chr1:201631785-201631975@@Human_restTopic11_164
chr1	201631905	201632095	chr1:201631905-201632095@@Human_restTopic11_164
chr1	201632025	201632215	chr1:201632025-201632215@@Human_restTopic11_164
chr1	201632035	201632225	chr1:201632035-201632225@@Human_restTopic11_164
chr10	82211725	82211915	chr10:82211725-82211915@@Human_restTopic11_165
chr10	82211845	82212035	chr10:82211845-82212035@@Human_restTopic11_165
chr10	82211965	82212155	chr10:82211965-82212155@@Human_restTopic11_165
chr10	82212067	82212257	chr10:82212067-82212257@@Human_restTopic11_165
chr3	15752711	15752901	chr3:15752711-15752901@@Human_restTopic11_166
chr3	15752831	15753021	chr3:15752831-15753021@@Human_restTopic11_166
chr3	15752951	15753141	chr3:15752951-15753141@@Human_restTopic11_166
chr3	15753071	15753261	chr3:15753071-15753261@@Human_restTopic11_166
chr3	15753075	15753265	chr3:15753075-15753265@@Human_restTopic11_166
chr15	89623022	89623212	chr15:89623022-89623212@@Human_restTopic11_167
chr15	89623142	89623332	chr15:89623142-89623332@@Human_restTopic11_167
chr15	89623262	89623452	chr15:89623262-89623452@@Human_restTopic11_167
chr15	89623382	89623572	chr15:89623382-89623572@@Human_restTopic11_167
chr15	89623502	89623692	chr15:89623502-89623692@@Human_restTopic11_167
chr15	89623539	89623729	chr15:89623539-89623729@@Human_restTopic11_167
chr1	201700280	201700470	chr1:201700280-201700470@@Human_restTopic11_168
chr1	201700400	201700590	chr1:201700400-201700590@@Human_restTopic11_168
chr1	201700415	201700605	chr1:201700415-201700605@@Human_restTopic11_168
chr15	89192420	89192610	chr15:89192420-89192610@@Human_restTopic11_169
chr15	89192540	89192730	chr15:89192540-89192730@@Human_restTopic11_169
chr15	89192660	89192850	chr15:89192660-89192850@@Human_restTopic11_169
chr15	89192755	89192945	chr15:89192755-89192945@@Human_restTopic11_169
chr13	45003360	45003550	chr13:45003360-45003550@@Human_restTopic11_17
chr13	45003480	45003670	chr13:45003480-45003670@@Human_restTopic11_17
chr13	45003600	45003790	chr13:45003600-45003790@@Human_restTopic11_17
chr13	45003720	45003910	chr13:45003720-45003910@@Human_restTopic11_17
chr13	45003840	45004030	chr13:45003840-45004030@@Human_restTopic11_17
chr13	45003895	45004085	chr13:45003895-45004085@@Human_restTopic11_17
chr3	49521790	49521980	chr3:49521790-49521980@@Human_restTopic11_170
chr3	49521910	49522100	chr3:49521910-49522100@@Human_restTopic11_170
chr3	49522030	49522220	chr3:49522030-49522220@@Human_restTopic11_170
chr3	49522150	49522340	chr3:49522150-49522340@@Human_restTopic11_170
chr3	49522270	49522460	chr3:49522270-49522460@@Human_restTopic11_170
chr3	49522390	49522580	chr3:49522390-49522580@@Human_restTopic11_170
chr3	49522510	49522700	chr3:49522510-49522700@@Human_restTopic11_170
chr3	49522630	49522820	chr3:49522630-49522820@@Human_restTopic11_170
chr3	49522750	49522940	chr3:49522750-49522940@@Human_restTopic11_170
chr3	49522870	49523060	chr3:49522870-49523060@@Human_restTopic11_170
chr3	49522990	49523180	chr3:49522990-49523180@@Human_restTopic11_170
chr3	49523110	49523300	chr3:49523110-49523300@@Human_restTopic11_170
chr3	49523230	49523420	chr3:49523230-49523420@@Human_restTopic11_170
chr3	49523350	49523540	chr3:49523350-49523540@@Human_restTopic11_170
chr3	49523470	49523660	chr3:49523470-49523660@@Human_restTopic11_170
chr3	49523590	49523780	chr3:49523590-49523780@@Human_restTopic11_170
chr3	49523628	49523818	chr3:49523628-49523818@@Human_restTopic11_170
chr9	87172468	87172658	chr9:87172468-87172658@@Human_restTopic11_171
chr9	87172588	87172778	chr9:87172588-87172778@@Human_restTopic11_171
chr9	87172708	87172898	chr9:87172708-87172898@@Human_restTopic11_171
chr9	87172828	87173018	chr9:87172828-87173018@@Human_restTopic11_171
chr9	87172948	87173138	chr9:87172948-87173138@@Human_restTopic11_171
chr9	87172965	87173155	chr9:87172965-87173155@@Human_restTopic11_171
chr3	9905724	9905914	chr3:9905724-9905914@@Human_restTopic11_172
chr3	9905844	9906034	chr3:9905844-9906034@@Human_restTopic11_172
chr3	9905964	9906154	chr3:9905964-9906154@@Human_restTopic11_172
chr3	9906084	9906274	chr3:9906084-9906274@@Human_restTopic11_172
chr3	9906204	9906394	chr3:9906204-9906394@@Human_restTopic11_172
chr3	9906324	9906514	chr3:9906324-9906514@@Human_restTopic11_172
chr3	9906444	9906634	chr3:9906444-9906634@@Human_restTopic11_172
chr3	9906469	9906659	chr3:9906469-9906659@@Human_restTopic11_172
chr3	147987415	147987605	chr3:147987415-147987605@@Human_restTopic11_173
chr3	147987535	147987725	chr3:147987535-147987725@@Human_restTopic11_173
chr3	147987655	147987845	chr3:147987655-147987845@@Human_restTopic11_173
chr3	147987775	147987965	chr3:147987775-147987965@@Human_restTopic11_173
chr3	147987848	147988038	chr3:147987848-147988038@@Human_restTopic11_173
chr2	39869376	39869566	chr2:39869376-39869566@@Human_restTopic11_174
chr2	39869496	39869686	chr2:39869496-39869686@@Human_restTopic11_174
chr2	39869616	39869806	chr2:39869616-39869806@@Human_restTopic11_174
chr2	39869671	39869861	chr2:39869671-39869861@@Human_restTopic11_174
chr15	100777567	100777757	chr15:100777567-100777757@@Human_restTopic11_175
chr15	100777687	100777877	chr15:100777687-100777877@@Human_restTopic11_175
chr15	100777717	100777907	chr15:100777717-100777907@@Human_restTopic11_175
chr16	27729639	27729829	chr16:27729639-27729829@@Human_restTopic11_176
chr16	27729759	27729949	chr16:27729759-27729949@@Human_restTopic11_176
chr16	27729879	27730069	chr16:27729879-27730069@@Human_restTopic11_176
chr16	27729999	27730189	chr16:27729999-27730189@@Human_restTopic11_176
chr16	27730119	27730309	chr16:27730119-27730309@@Human_restTopic11_176
chr16	27730239	27730429	chr16:27730239-27730429@@Human_restTopic11_176
chr16	27730309	27730499	chr16:27730309-27730499@@Human_restTopic11_176
chr10	29844707	29844897	chr10:29844707-29844897@@Human_restTopic11_177
chr10	29844827	29845017	chr10:29844827-29845017@@Human_restTopic11_177
chr10	29844947	29845137	chr10:29844947-29845137@@Human_restTopic11_177
chr10	29845067	29845257	chr10:29845067-29845257@@Human_restTopic11_177
chr10	29845187	29845377	chr10:29845187-29845377@@Human_restTopic11_177
chr10	29845233	29845423	chr10:29845233-29845423@@Human_restTopic11_177
chr6	37279490	37279680	chr6:37279490-37279680@@Human_restTopic11_178
chr6	37279610	37279800	chr6:37279610-37279800@@Human_restTopic11_178
chr6	37279654	37279844	chr6:37279654-37279844@@Human_restTopic11_178
chr15	92079978	92080168	chr15:92079978-92080168@@Human_restTopic11_179
chr15	92080098	92080288	chr15:92080098-92080288@@Human_restTopic11_179
chr15	92080218	92080408	chr15:92080218-92080408@@Human_restTopic11_179
chr15	92080338	92080528	chr15:92080338-92080528@@Human_restTopic11_179
chr15	92080371	92080561	chr15:92080371-92080561@@Human_restTopic11_179
chr3	196006206	196006396	chr3:196006206-196006396@@Human_restTopic11_18
chr3	196006326	196006516	chr3:196006326-196006516@@Human_restTopic11_18
chr3	196006446	196006636	chr3:196006446-196006636@@Human_restTopic11_18
chr3	196006480	196006670	chr3:196006480-196006670@@Human_restTopic11_18
chr8	105033946	105034136	chr8:105033946-105034136@@Human_restTopic11_180
chr8	105034066	105034256	chr8:105034066-105034256@@Human_restTopic11_180
chr8	105034186	105034376	chr8:105034186-105034376@@Human_restTopic11_180
chr8	105034306	105034496	chr8:105034306-105034496@@Human_restTopic11_180
chr8	105034426	105034616	chr8:105034426-105034616@@Human_restTopic11_180
chr8	105034504	105034694	chr8:105034504-105034694@@Human_restTopic11_180
chr8	120439392	120439582	chr8:120439392-120439582@@Human_restTopic11_181
chr8	120439512	120439702	chr8:120439512-120439702@@Human_restTopic11_181
chr8	120439632	120439822	chr8:120439632-120439822@@Human_restTopic11_181
chr8	120439752	120439942	chr8:120439752-120439942@@Human_restTopic11_181
chr8	120439872	120440062	chr8:120439872-120440062@@Human_restTopic11_181
chr8	120439992	120440182	chr8:120439992-120440182@@Human_restTopic11_181
chr8	120440099	120440289	chr8:120440099-120440289@@Human_restTopic11_181
chr1	232659685	232659875	chr1:232659685-232659875@@Human_restTopic11_182
chr1	232659805	232659995	chr1:232659805-232659995@@Human_restTopic11_182
chr1	232659925	232660115	chr1:232659925-232660115@@Human_restTopic11_182
chr1	232659944	232660134	chr1:232659944-232660134@@Human_restTopic11_182
chr15	99331364	99331554	chr15:99331364-99331554@@Human_restTopic11_183
chr15	99331484	99331674	chr15:99331484-99331674@@Human_restTopic11_183
chr15	99331604	99331794	chr15:99331604-99331794@@Human_restTopic11_183
chr15	99331724	99331914	chr15:99331724-99331914@@Human_restTopic11_183
chr15	99331813	99332003	chr15:99331813-99332003@@Human_restTopic11_183
chr11	55652508	55652698	chr11:55652508-55652698@@Human_restTopic11_184
chr11	55652628	55652818	chr11:55652628-55652818@@Human_restTopic11_184
chr11	55652748	55652938	chr11:55652748-55652938@@Human_restTopic11_184
chr11	55652868	55653058	chr11:55652868-55653058@@Human_restTopic11_184
chr11	55652988	55653178	chr11:55652988-55653178@@Human_restTopic11_184
chr11	55653108	55653298	chr11:55653108-55653298@@Human_restTopic11_184
chr11	55653228	55653418	chr11:55653228-55653418@@Human_restTopic11_184
chr11	55653348	55653538	chr11:55653348-55653538@@Human_restTopic11_184
chr11	55653351	55653541	chr11:55653351-55653541@@Human_restTopic11_184
chr16	58328816	58329006	chr16:58328816-58329006@@Human_restTopic11_185
chr16	58328936	58329126	chr16:58328936-58329126@@Human_restTopic11_185
chr16	58328999	58329189	chr16:58328999-58329189@@Human_restTopic11_185
chr19	33954079	33954269	chr19:33954079-33954269@@Human_restTopic11_186
chr19	33954199	33954389	chr19:33954199-33954389@@Human_restTopic11_186
chr19	33954319	33954509	chr19:33954319-33954509@@Human_restTopic11_186
chr19	33954335	33954525	chr19:33954335-33954525@@Human_restTopic11_186
chr1	87062381	87062571	chr1:87062381-87062571@@Human_restTopic11_187
chr1	87062501	87062691	chr1:87062501-87062691@@Human_restTopic11_187
chr1	87062621	87062811	chr1:87062621-87062811@@Human_restTopic11_187
chr1	87062741	87062931	chr1:87062741-87062931@@Human_restTopic11_187
chr1	87062760	87062950	chr1:87062760-87062950@@Human_restTopic11_187
chr9	112209855	112210045	chr9:112209855-112210045@@Human_restTopic11_188
chr9	112209975	112210165	chr9:112209975-112210165@@Human_restTopic11_188
chr9	112210095	112210285	chr9:112210095-112210285@@Human_restTopic11_188
chr9	112210134	112210324	chr9:112210134-112210324@@Human_restTopic11_188
chr14	32479751	32479941	chr14:32479751-32479941@@Human_restTopic11_189
chr14	32479871	32480061	chr14:32479871-32480061@@Human_restTopic11_189
chr14	32479991	32480181	chr14:32479991-32480181@@Human_restTopic11_189
chr14	32480111	32480301	chr14:32480111-32480301@@Human_restTopic11_189
chr14	32480127	32480317	chr14:32480127-32480317@@Human_restTopic11_189
chr1	150383099	150383289	chr1:150383099-150383289@@Human_restTopic11_19
chr1	150383219	150383409	chr1:150383219-150383409@@Human_restTopic11_19
chr1	150383339	150383529	chr1:150383339-150383529@@Human_restTopic11_19
chr1	150383436	150383626	chr1:150383436-150383626@@Human_restTopic11_19
chr11	55198734	55198924	chr11:55198734-55198924@@Human_restTopic11_190
chr11	55198854	55199044	chr11:55198854-55199044@@Human_restTopic11_190
chr11	55198974	55199164	chr11:55198974-55199164@@Human_restTopic11_190
chr11	55199094	55199284	chr11:55199094-55199284@@Human_restTopic11_190
chr11	55199128	55199318	chr11:55199128-55199318@@Human_restTopic11_190
chr15	89376992	89377182	chr15:89376992-89377182@@Human_restTopic11_191
chr15	89377112	89377302	chr15:89377112-89377302@@Human_restTopic11_191
chr15	89377232	89377422	chr15:89377232-89377422@@Human_restTopic11_191
chr15	89377258	89377448	chr15:89377258-89377448@@Human_restTopic11_191
chr2	189198462	189198652	chr2:189198462-189198652@@Human_restTopic11_192
chr2	189198582	189198772	chr2:189198582-189198772@@Human_restTopic11_192
chr2	189198631	189198821	chr2:189198631-189198821@@Human_restTopic11_192
chr12	9517361	9517551	chr12:9517361-9517551@@Human_restTopic11_193
chr12	9517481	9517671	chr12:9517481-9517671@@Human_restTopic11_193
chr12	9517601	9517791	chr12:9517601-9517791@@Human_restTopic11_193
chr12	9517721	9517911	chr12:9517721-9517911@@Human_restTopic11_193
chr12	9517841	9518031	chr12:9517841-9518031@@Human_restTopic11_193
chr12	9517961	9518151	chr12:9517961-9518151@@Human_restTopic11_193
chr12	9517968	9518158	chr12:9517968-9518158@@Human_restTopic11_193
chr13	45293977	45294167	chr13:45293977-45294167@@Human_restTopic11_194
chr13	45294097	45294287	chr13:45294097-45294287@@Human_restTopic11_194
chr13	45294217	45294407	chr13:45294217-45294407@@Human_restTopic11_194
chr13	45294337	45294527	chr13:45294337-45294527@@Human_restTopic11_194
chr13	45294457	45294647	chr13:45294457-45294647@@Human_restTopic11_194
chr13	45294538	45294728	chr13:45294538-45294728@@Human_restTopic11_194
chr5	73847817	73848007	chr5:73847817-73848007@@Human_restTopic11_195
chr5	73847937	73848127	chr5:73847937-73848127@@Human_restTopic11_195
chr5	73848057	73848247	chr5:73848057-73848247@@Human_restTopic11_195
chr5	73848177	73848367	chr5:73848177-73848367@@Human_restTopic11_195
chr5	73848187	73848377	chr5:73848187-73848377@@Human_restTopic11_195
chr17	16814785	16814975	chr17:16814785-16814975@@Human_restTopic11_196
chr17	16814905	16815095	chr17:16814905-16815095@@Human_restTopic11_196
chr17	16815025	16815215	chr17:16815025-16815215@@Human_restTopic11_196
chr17	16815063	16815253	chr17:16815063-16815253@@Human_restTopic11_196
chr2	106226978	106227168	chr2:106226978-106227168@@Human_restTopic11_197
chr2	106227098	106227288	chr2:106227098-106227288@@Human_restTopic11_197
chr2	106227218	106227408	chr2:106227218-106227408@@Human_restTopic11_197
chr2	106227338	106227528	chr2:106227338-106227528@@Human_restTopic11_197
chr2	106227458	106227648	chr2:106227458-106227648@@Human_restTopic11_197
chr2	106227578	106227768	chr2:106227578-106227768@@Human_restTopic11_197
chr2	106227698	106227888	chr2:106227698-106227888@@Human_restTopic11_197
chr2	106227718	106227908	chr2:106227718-106227908@@Human_restTopic11_197
chr17	45153568	45153758	chr17:45153568-45153758@@Human_restTopic11_198
chr17	45153688	45153878	chr17:45153688-45153878@@Human_restTopic11_198
chr17	45153808	45153998	chr17:45153808-45153998@@Human_restTopic11_198
chr17	45153847	45154037	chr17:45153847-45154037@@Human_restTopic11_198
chr22	46988252	46988442	chr22:46988252-46988442@@Human_restTopic11_199
chr22	46988372	46988562	chr22:46988372-46988562@@Human_restTopic11_199
chr22	46988492	46988682	chr22:46988492-46988682@@Human_restTopic11_199
chr22	46988549	46988739	chr22:46988549-46988739@@Human_restTopic11_199
chr7	98955531	98955721	chr7:98955531-98955721@@Human_restTopic11_2
chr7	98955651	98955841	chr7:98955651-98955841@@Human_restTopic11_2
chr7	98955771	98955961	chr7:98955771-98955961@@Human_restTopic11_2
chr7	98955891	98956081	chr7:98955891-98956081@@Human_restTopic11_2
chr7	98956011	98956201	chr7:98956011-98956201@@Human_restTopic11_2
chr7	98956031	98956221	chr7:98956031-98956221@@Human_restTopic11_2
chr3	69978112	69978302	chr3:69978112-69978302@@Human_restTopic11_20
chr3	69978232	69978422	chr3:69978232-69978422@@Human_restTopic11_20
chr3	69978325	69978515	chr3:69978325-69978515@@Human_restTopic11_20
chr3	38369077	38369267	chr3:38369077-38369267@@Human_restTopic11_200
chr3	38369197	38369387	chr3:38369197-38369387@@Human_restTopic11_200
chr3	38369317	38369507	chr3:38369317-38369507@@Human_restTopic11_200
chr3	38369437	38369627	chr3:38369437-38369627@@Human_restTopic11_200
chr3	38369539	38369729	chr3:38369539-38369729@@Human_restTopic11_200
chr1	215227564	215227754	chr1:215227564-215227754@@Human_restTopic11_201
chr1	215227684	215227874	chr1:215227684-215227874@@Human_restTopic11_201
chr1	215227767	215227957	chr1:215227767-215227957@@Human_restTopic11_201
chr1	183373575	183373765	chr1:183373575-183373765@@Human_restTopic11_202
chr1	183373695	183373885	chr1:183373695-183373885@@Human_restTopic11_202
chr1	183373815	183374005	chr1:183373815-183374005@@Human_restTopic11_202
chr1	183373905	183374095	chr1:183373905-183374095@@Human_restTopic11_202
chr3	41317554	41317744	chr3:41317554-41317744@@Human_restTopic11_203
chr3	41317674	41317864	chr3:41317674-41317864@@Human_restTopic11_203
chr3	41317794	41317984	chr3:41317794-41317984@@Human_restTopic11_203
chr3	41317914	41318104	chr3:41317914-41318104@@Human_restTopic11_203
chr3	41318034	41318224	chr3:41318034-41318224@@Human_restTopic11_203
chr3	41318051	41318241	chr3:41318051-41318241@@Human_restTopic11_203
chr2	13097378	13097568	chr2:13097378-13097568@@Human_restTopic11_204
chr2	13097498	13097688	chr2:13097498-13097688@@Human_restTopic11_204
chr2	13097616	13097806	chr2:13097616-13097806@@Human_restTopic11_204
chr16	90047811	90048001	chr16:90047811-90048001@@Human_restTopic11_205
chr16	90047931	90048121	chr16:90047931-90048121@@Human_restTopic11_205
chr16	90048051	90048241	chr16:90048051-90048241@@Human_restTopic11_205
chr16	90048171	90048361	chr16:90048171-90048361@@Human_restTopic11_205
chr16	90048291	90048481	chr16:90048291-90048481@@Human_restTopic11_205
chr16	90048326	90048516	chr16:90048326-90048516@@Human_restTopic11_205
chr13	30639310	30639500	chr13:30639310-30639500@@Human_restTopic11_206
chr13	30639430	30639620	chr13:30639430-30639620@@Human_restTopic11_206
chr13	30639461	30639651	chr13:30639461-30639651@@Human_restTopic11_206
chr15	78550001	78550191	chr15:78550001-78550191@@Human_restTopic11_207
chr15	78550121	78550311	chr15:78550121-78550311@@Human_restTopic11_207
chr15	78550237	78550427	chr15:78550237-78550427@@Human_restTopic11_207
chr21	35931408	35931598	chr21:35931408-35931598@@Human_restTopic11_208
chr21	35931528	35931718	chr21:35931528-35931718@@Human_restTopic11_208
chr21	35931648	35931838	chr21:35931648-35931838@@Human_restTopic11_208
chr21	35931768	35931958	chr21:35931768-35931958@@Human_restTopic11_208
chr21	35931809	35931999	chr21:35931809-35931999@@Human_restTopic11_208
chr12	118432276	118432466	chr12:118432276-118432466@@Human_restTopic11_209
chr12	118432396	118432586	chr12:118432396-118432586@@Human_restTopic11_209
chr12	118432516	118432706	chr12:118432516-118432706@@Human_restTopic11_209
chr12	118432606	118432796	chr12:118432606-118432796@@Human_restTopic11_209
chr1	151956827	151957017	chr1:151956827-151957017@@Human_restTopic11_21
chr1	151956947	151957137	chr1:151956947-151957137@@Human_restTopic11_21
chr1	151957067	151957257	chr1:151957067-151957257@@Human_restTopic11_21
chr1	151957161	151957351	chr1:151957161-151957351@@Human_restTopic11_21
chr3	111487431	111487621	chr3:111487431-111487621@@Human_restTopic11_210
chr3	111487551	111487741	chr3:111487551-111487741@@Human_restTopic11_210
chr3	111487671	111487861	chr3:111487671-111487861@@Human_restTopic11_210
chr3	111487791	111487981	chr3:111487791-111487981@@Human_restTopic11_210
chr3	111487841	111488031	chr3:111487841-111488031@@Human_restTopic11_210
chr13	45716862	45717052	chr13:45716862-45717052@@Human_restTopic11_211
chr13	45716982	45717172	chr13:45716982-45717172@@Human_restTopic11_211
chr13	45717102	45717292	chr13:45717102-45717292@@Human_restTopic11_211
chr13	45717222	45717412	chr13:45717222-45717412@@Human_restTopic11_211
chr13	45717342	45717532	chr13:45717342-45717532@@Human_restTopic11_211
chr13	45717462	45717652	chr13:45717462-45717652@@Human_restTopic11_211
chr13	45717582	45717772	chr13:45717582-45717772@@Human_restTopic11_211
chr13	45717675	45717865	chr13:45717675-45717865@@Human_restTopic11_211
chr15	99439542	99439732	chr15:99439542-99439732@@Human_restTopic11_212
chr15	99439662	99439852	chr15:99439662-99439852@@Human_restTopic11_212
chr15	99439782	99439972	chr15:99439782-99439972@@Human_restTopic11_212
chr15	99439902	99440092	chr15:99439902-99440092@@Human_restTopic11_212
chr15	99440022	99440212	chr15:99440022-99440212@@Human_restTopic11_212
chr15	99440142	99440332	chr15:99440142-99440332@@Human_restTopic11_212
chr15	99440262	99440452	chr15:99440262-99440452@@Human_restTopic11_212
chr15	99440316	99440506	chr15:99440316-99440506@@Human_restTopic11_212
chr15	43359970	43360160	chr15:43359970-43360160@@Human_restTopic11_213
chr15	43360090	43360280	chr15:43360090-43360280@@Human_restTopic11_213
chr15	43360210	43360400	chr15:43360210-43360400@@Human_restTopic11_213
chr15	43360330	43360520	chr15:43360330-43360520@@Human_restTopic11_213
chr15	43360353	43360543	chr15:43360353-43360543@@Human_restTopic11_213
chr6	8108427	8108617	chr6:8108427-8108617@@Human_restTopic11_214
chr6	8108547	8108737	chr6:8108547-8108737@@Human_restTopic11_214
chr6	8108667	8108857	chr6:8108667-8108857@@Human_restTopic11_214
chr6	8108692	8108882	chr6:8108692-8108882@@Human_restTopic11_214
chr19	6241675	6241865	chr19:6241675-6241865@@Human_restTopic11_215
chr19	6241795	6241985	chr19:6241795-6241985@@Human_restTopic11_215
chr19	6241915	6242105	chr19:6241915-6242105@@Human_restTopic11_215
chr19	6242035	6242225	chr19:6242035-6242225@@Human_restTopic11_215
chr19	6242046	6242236	chr19:6242046-6242236@@Human_restTopic11_215
chr16	34553902	34554092	chr16:34553902-34554092@@Human_restTopic11_216
chr16	34554022	34554212	chr16:34554022-34554212@@Human_restTopic11_216
chr16	34554139	34554329	chr16:34554139-34554329@@Human_restTopic11_216
chr2	62805089	62805279	chr2:62805089-62805279@@Human_restTopic11_217
chr2	62805209	62805399	chr2:62805209-62805399@@Human_restTopic11_217
chr2	62805329	62805519	chr2:62805329-62805519@@Human_restTopic11_217
chr2	62805449	62805639	chr2:62805449-62805639@@Human_restTopic11_217
chr2	62805543	62805733	chr2:62805543-62805733@@Human_restTopic11_217
chr1	226974810	226975000	chr1:226974810-226975000@@Human_restTopic11_218
chr1	226974930	226975120	chr1:226974930-226975120@@Human_restTopic11_218
chr1	226974990	226975180	chr1:226974990-226975180@@Human_restTopic11_218
chr4	84473152	84473342	chr4:84473152-84473342@@Human_restTopic11_219
chr4	84473272	84473462	chr4:84473272-84473462@@Human_restTopic11_219
chr4	84473392	84473582	chr4:84473392-84473582@@Human_restTopic11_219
chr4	84473512	84473702	chr4:84473512-84473702@@Human_restTopic11_219
chr4	84473514	84473704	chr4:84473514-84473704@@Human_restTopic11_219
chr8	75404923	75405113	chr8:75404923-75405113@@Human_restTopic11_22
chr8	75405043	75405233	chr8:75405043-75405233@@Human_restTopic11_22
chr8	75405163	75405353	chr8:75405163-75405353@@Human_restTopic11_22
chr8	75405239	75405429	chr8:75405239-75405429@@Human_restTopic11_22
chr11	8429800	8429990	chr11:8429800-8429990@@Human_restTopic11_220
chr11	8429920	8430110	chr11:8429920-8430110@@Human_restTopic11_220
chr11	8430040	8430230	chr11:8430040-8430230@@Human_restTopic11_220
chr11	8430160	8430350	chr11:8430160-8430350@@Human_restTopic11_220
chr11	8430280	8430470	chr11:8430280-8430470@@Human_restTopic11_220
chr11	8430304	8430494	chr11:8430304-8430494@@Human_restTopic11_220
chr4	102036123	102036313	chr4:102036123-102036313@@Human_restTopic11_221
chr4	102036243	102036433	chr4:102036243-102036433@@Human_restTopic11_221
chr4	102036350	102036540	chr4:102036350-102036540@@Human_restTopic11_221
chr1	179995607	179995797	chr1:179995607-179995797@@Human_restTopic11_222
chr1	179995727	179995917	chr1:179995727-179995917@@Human_restTopic11_222
chr1	179995847	179996037	chr1:179995847-179996037@@Human_restTopic11_222
chr1	179995902	179996092	chr1:179995902-179996092@@Human_restTopic11_222
chr14	36454762	36454952	chr14:36454762-36454952@@Human_restTopic11_223
chr14	36454882	36455072	chr14:36454882-36455072@@Human_restTopic11_223
chr14	36455002	36455192	chr14:36455002-36455192@@Human_restTopic11_223
chr14	36455122	36455312	chr14:36455122-36455312@@Human_restTopic11_223
chr14	36455242	36455432	chr14:36455242-36455432@@Human_restTopic11_223
chr14	36455362	36455552	chr14:36455362-36455552@@Human_restTopic11_223
chr14	36455482	36455672	chr14:36455482-36455672@@Human_restTopic11_223
chr14	36455517	36455707	chr14:36455517-36455707@@Human_restTopic11_223
chr18	18888691	18888881	chr18:18888691-18888881@@Human_restTopic11_224
chr18	18888811	18889001	chr18:18888811-18889001@@Human_restTopic11_224
chr18	18888931	18889121	chr18:18888931-18889121@@Human_restTopic11_224
chr18	18889051	18889241	chr18:18889051-18889241@@Human_restTopic11_224
chr18	18889135	18889325	chr18:18889135-18889325@@Human_restTopic11_224
chr1	178306188	178306378	chr1:178306188-178306378@@Human_restTopic11_225
chr1	178306308	178306498	chr1:178306308-178306498@@Human_restTopic11_225
chr1	178306428	178306618	chr1:178306428-178306618@@Human_restTopic11_225
chr1	178306548	178306738	chr1:178306548-178306738@@Human_restTopic11_225
chr1	178306603	178306793	chr1:178306603-178306793@@Human_restTopic11_225
chr1	158966778	158966968	chr1:158966778-158966968@@Human_restTopic11_226
chr1	158966898	158967088	chr1:158966898-158967088@@Human_restTopic11_226
chr1	158966950	158967140	chr1:158966950-158967140@@Human_restTopic11_226
chr6	11219009	11219199	chr6:11219009-11219199@@Human_restTopic11_227
chr6	11219129	11219319	chr6:11219129-11219319@@Human_restTopic11_227
chr6	11219249	11219439	chr6:11219249-11219439@@Human_restTopic11_227
chr6	11219369	11219559	chr6:11219369-11219559@@Human_restTopic11_227
chr6	11219423	11219613	chr6:11219423-11219613@@Human_restTopic11_227
chr14	56954426	56954616	chr14:56954426-56954616@@Human_restTopic11_228
chr14	56954546	56954736	chr14:56954546-56954736@@Human_restTopic11_228
chr14	56954666	56954856	chr14:56954666-56954856@@Human_restTopic11_228
chr14	56954767	56954957	chr14:56954767-56954957@@Human_restTopic11_228
chr12	65339864	65340054	chr12:65339864-65340054@@Human_restTopic11_229
chr12	65339984	65340174	chr12:65339984-65340174@@Human_restTopic11_229
chr12	65340104	65340294	chr12:65340104-65340294@@Human_restTopic11_229
chr12	65340224	65340414	chr12:65340224-65340414@@Human_restTopic11_229
chr12	65340344	65340534	chr12:65340344-65340534@@Human_restTopic11_229
chr12	65340349	65340539	chr12:65340349-65340539@@Human_restTopic11_229
chr1	244608974	244609164	chr1:244608974-244609164@@Human_restTopic11_23
chr1	244609094	244609284	chr1:244609094-244609284@@Human_restTopic11_23
chr1	244609191	244609381	chr1:244609191-244609381@@Human_restTopic11_23
chr12	83092619	83092809	chr12:83092619-83092809@@Human_restTopic11_230
chr12	83092739	83092929	chr12:83092739-83092929@@Human_restTopic11_230
chr12	83092859	83093049	chr12:83092859-83093049@@Human_restTopic11_230
chr12	83092979	83093169	chr12:83092979-83093169@@Human_restTopic11_230
chr12	83093068	83093258	chr12:83093068-83093258@@Human_restTopic11_230
chr1	160806930	160807120	chr1:160806930-160807120@@Human_restTopic11_231
chr1	160807050	160807240	chr1:160807050-160807240@@Human_restTopic11_231
chr1	160807170	160807360	chr1:160807170-160807360@@Human_restTopic11_231
chr1	160807290	160807480	chr1:160807290-160807480@@Human_restTopic11_231
chr1	160807410	160807600	chr1:160807410-160807600@@Human_restTopic11_231
chr1	160807530	160807720	chr1:160807530-160807720@@Human_restTopic11_231
chr1	160807650	160807840	chr1:160807650-160807840@@Human_restTopic11_231
chr1	160807770	160807960	chr1:160807770-160807960@@Human_restTopic11_231
chr1	160807795	160807985	chr1:160807795-160807985@@Human_restTopic11_231
chr6	125678483	125678673	chr6:125678483-125678673@@Human_restTopic11_232
chr6	125678603	125678793	chr6:125678603-125678793@@Human_restTopic11_232
chr6	125678723	125678913	chr6:125678723-125678913@@Human_restTopic11_232
chr6	125678843	125679033	chr6:125678843-125679033@@Human_restTopic11_232
chr6	125678963	125679153	chr6:125678963-125679153@@Human_restTopic11_232
chr6	125679083	125679273	chr6:125679083-125679273@@Human_restTopic11_232
chr6	125679203	125679393	chr6:125679203-125679393@@Human_restTopic11_232
chr6	125679258	125679448	chr6:125679258-125679448@@Human_restTopic11_232
chr1	245748484	245748674	chr1:245748484-245748674@@Human_restTopic11_233
chr1	245748604	245748794	chr1:245748604-245748794@@Human_restTopic11_233
chr1	245748724	245748914	chr1:245748724-245748914@@Human_restTopic11_233
chr1	245748844	245749034	chr1:245748844-245749034@@Human_restTopic11_233
chr1	245748964	245749154	chr1:245748964-245749154@@Human_restTopic11_233
chr1	245748976	245749166	chr1:245748976-245749166@@Human_restTopic11_233
chr14	51490740	51490930	chr14:51490740-51490930@@Human_restTopic11_234
chr14	51490860	51491050	chr14:51490860-51491050@@Human_restTopic11_234
chr14	51490980	51491170	chr14:51490980-51491170@@Human_restTopic11_234
chr14	51491100	51491290	chr14:51491100-51491290@@Human_restTopic11_234
chr14	51491193	51491383	chr14:51491193-51491383@@Human_restTopic11_234
chr13	58126555	58126745	chr13:58126555-58126745@@Human_restTopic11_235
chr13	58126675	58126865	chr13:58126675-58126865@@Human_restTopic11_235
chr13	58126795	58126985	chr13:58126795-58126985@@Human_restTopic11_235
chr13	58126827	58127017	chr13:58126827-58127017@@Human_restTopic11_235
chr12	96836652	96836842	chr12:96836652-96836842@@Human_restTopic11_236
chr12	96836772	96836962	chr12:96836772-96836962@@Human_restTopic11_236
chr12	96836839	96837029	chr12:96836839-96837029@@Human_restTopic11_236
chr1	245584236	245584426	chr1:245584236-245584426@@Human_restTopic11_237
chr1	245584356	245584546	chr1:245584356-245584546@@Human_restTopic11_237
chr1	245584409	245584599	chr1:245584409-245584599@@Human_restTopic11_237
chr1	210656228	210656418	chr1:210656228-210656418@@Human_restTopic11_238
chr1	210656348	210656538	chr1:210656348-210656538@@Human_restTopic11_238
chr1	210656468	210656658	chr1:210656468-210656658@@Human_restTopic11_238
chr1	210656588	210656778	chr1:210656588-210656778@@Human_restTopic11_238
chr1	210656664	210656854	chr1:210656664-210656854@@Human_restTopic11_238
chr3	156174529	156174719	chr3:156174529-156174719@@Human_restTopic11_239
chr3	156174649	156174839	chr3:156174649-156174839@@Human_restTopic11_239
chr3	156174769	156174959	chr3:156174769-156174959@@Human_restTopic11_239
chr3	156174785	156174975	chr3:156174785-156174975@@Human_restTopic11_239
chr15	80270738	80270928	chr15:80270738-80270928@@Human_restTopic11_24
chr15	80270858	80271048	chr15:80270858-80271048@@Human_restTopic11_24
chr15	80270978	80271168	chr15:80270978-80271168@@Human_restTopic11_24
chr15	80271098	80271288	chr15:80271098-80271288@@Human_restTopic11_24
chr15	80271218	80271408	chr15:80271218-80271408@@Human_restTopic11_24
chr15	80271338	80271528	chr15:80271338-80271528@@Human_restTopic11_24
chr15	80271381	80271571	chr15:80271381-80271571@@Human_restTopic11_24
chr1	183040273	183040463	chr1:183040273-183040463@@Human_restTopic11_240
chr1	183040393	183040583	chr1:183040393-183040583@@Human_restTopic11_240
chr1	183040513	183040703	chr1:183040513-183040703@@Human_restTopic11_240
chr1	183040569	183040759	chr1:183040569-183040759@@Human_restTopic11_240
chr13	110680224	110680414	chr13:110680224-110680414@@Human_restTopic11_241
chr13	110680344	110680534	chr13:110680344-110680534@@Human_restTopic11_241
chr13	110680464	110680654	chr13:110680464-110680654@@Human_restTopic11_241
chr13	110680584	110680774	chr13:110680584-110680774@@Human_restTopic11_241
chr13	110680629	110680819	chr13:110680629-110680819@@Human_restTopic11_241
chr3	196484558	196484748	chr3:196484558-196484748@@Human_restTopic11_242
chr3	196484678	196484868	chr3:196484678-196484868@@Human_restTopic11_242
chr3	196484798	196484988	chr3:196484798-196484988@@Human_restTopic11_242
chr3	196484918	196485108	chr3:196484918-196485108@@Human_restTopic11_242
chr3	196484959	196485149	chr3:196484959-196485149@@Human_restTopic11_242
chr1	200048664	200048854	chr1:200048664-200048854@@Human_restTopic11_243
chr1	200048784	200048974	chr1:200048784-200048974@@Human_restTopic11_243
chr1	200048883	200049073	chr1:200048883-200049073@@Human_restTopic11_243
chr16	86524957	86525147	chr16:86524957-86525147@@Human_restTopic11_244
chr16	86525077	86525267	chr16:86525077-86525267@@Human_restTopic11_244
chr16	86525197	86525387	chr16:86525197-86525387@@Human_restTopic11_244
chr16	86525317	86525507	chr16:86525317-86525507@@Human_restTopic11_244
chr16	86525437	86525627	chr16:86525437-86525627@@Human_restTopic11_244
chr16	86525470	86525660	chr16:86525470-86525660@@Human_restTopic11_244
chr6	1562543	1562733	chr6:1562543-1562733@@Human_restTopic11_245
chr6	1562663	1562853	chr6:1562663-1562853@@Human_restTopic11_245
chr6	1562783	1562973	chr6:1562783-1562973@@Human_restTopic11_245
chr6	1562903	1563093	chr6:1562903-1563093@@Human_restTopic11_245
chr6	1563016	1563206	chr6:1563016-1563206@@Human_restTopic11_245
chr3	185548841	185549031	chr3:185548841-185549031@@Human_restTopic11_246
chr3	185548961	185549151	chr3:185548961-185549151@@Human_restTopic11_246
chr3	185549081	185549271	chr3:185549081-185549271@@Human_restTopic11_246
chr3	185549201	185549391	chr3:185549201-185549391@@Human_restTopic11_246
chr3	185549321	185549511	chr3:185549321-185549511@@Human_restTopic11_246
chr3	185549441	185549631	chr3:185549441-185549631@@Human_restTopic11_246
chr3	185549561	185549751	chr3:185549561-185549751@@Human_restTopic11_246
chr3	185549650	185549840	chr3:185549650-185549840@@Human_restTopic11_246
chr1	219884023	219884213	chr1:219884023-219884213@@Human_restTopic11_247
chr1	219884143	219884333	chr1:219884143-219884333@@Human_restTopic11_247
chr1	219884263	219884453	chr1:219884263-219884453@@Human_restTopic11_247
chr1	219884383	219884573	chr1:219884383-219884573@@Human_restTopic11_247
chr1	219884434	219884624	chr1:219884434-219884624@@Human_restTopic11_247
chr3	175575527	175575717	chr3:175575527-175575717@@Human_restTopic11_248
chr3	175575647	175575837	chr3:175575647-175575837@@Human_restTopic11_248
chr3	175575767	175575957	chr3:175575767-175575957@@Human_restTopic11_248
chr3	175575867	175576057	chr3:175575867-175576057@@Human_restTopic11_248
chr1	24786247	24786437	chr1:24786247-24786437@@Human_restTopic11_249
chr1	24786367	24786557	chr1:24786367-24786557@@Human_restTopic11_249
chr1	24786487	24786677	chr1:24786487-24786677@@Human_restTopic11_249
chr1	24786508	24786698	chr1:24786508-24786698@@Human_restTopic11_249
chr1	188857361	188857551	chr1:188857361-188857551@@Human_restTopic11_25
chr1	188857481	188857671	chr1:188857481-188857671@@Human_restTopic11_25
chr1	188857601	188857791	chr1:188857601-188857791@@Human_restTopic11_25
chr1	188857721	188857911	chr1:188857721-188857911@@Human_restTopic11_25
chr1	188857794	188857984	chr1:188857794-188857984@@Human_restTopic11_25
chr20	48278163	48278353	chr20:48278163-48278353@@Human_restTopic11_250
chr20	48278283	48278473	chr20:48278283-48278473@@Human_restTopic11_250
chr20	48278403	48278593	chr20:48278403-48278593@@Human_restTopic11_250
chr20	48278523	48278713	chr20:48278523-48278713@@Human_restTopic11_250
chr20	48278594	48278784	chr20:48278594-48278784@@Human_restTopic11_250
chr2	25740548	25740738	chr2:25740548-25740738@@Human_restTopic11_251
chr2	25740668	25740858	chr2:25740668-25740858@@Human_restTopic11_251
chr2	25740763	25740953	chr2:25740763-25740953@@Human_restTopic11_251
chr2	199053611	199053801	chr2:199053611-199053801@@Human_restTopic11_252
chr2	199053731	199053921	chr2:199053731-199053921@@Human_restTopic11_252
chr2	199053851	199054041	chr2:199053851-199054041@@Human_restTopic11_252
chr2	199053939	199054129	chr2:199053939-199054129@@Human_restTopic11_252
chr12	110587061	110587251	chr12:110587061-110587251@@Human_restTopic11_253
chr12	110587181	110587371	chr12:110587181-110587371@@Human_restTopic11_253
chr12	110587301	110587491	chr12:110587301-110587491@@Human_restTopic11_253
chr12	110587369	110587559	chr12:110587369-110587559@@Human_restTopic11_253
chr22	51152026	51152216	chr22:51152026-51152216@@Human_restTopic11_254
chr22	51152146	51152336	chr22:51152146-51152336@@Human_restTopic11_254
chr22	51152170	51152360	chr22:51152170-51152360@@Human_restTopic11_254
chr7	26376922	26377112	chr7:26376922-26377112@@Human_restTopic11_255
chr7	26377042	26377232	chr7:26377042-26377232@@Human_restTopic11_255
chr7	26377162	26377352	chr7:26377162-26377352@@Human_restTopic11_255
chr7	26377282	26377472	chr7:26377282-26377472@@Human_restTopic11_255
chr7	26377402	26377592	chr7:26377402-26377592@@Human_restTopic11_255
chr7	26377522	26377712	chr7:26377522-26377712@@Human_restTopic11_255
chr7	26377642	26377832	chr7:26377642-26377832@@Human_restTopic11_255
chr7	26377665	26377855	chr7:26377665-26377855@@Human_restTopic11_255
chr6	45780661	45780851	chr6:45780661-45780851@@Human_restTopic11_256
chr6	45780781	45780971	chr6:45780781-45780971@@Human_restTopic11_256
chr6	45780901	45781091	chr6:45780901-45781091@@Human_restTopic11_256
chr6	45780992	45781182	chr6:45780992-45781182@@Human_restTopic11_256
chr3	40956897	40957087	chr3:40956897-40957087@@Human_restTopic11_257
chr3	40957017	40957207	chr3:40957017-40957207@@Human_restTopic11_257
chr3	40957076	40957266	chr3:40957076-40957266@@Human_restTopic11_257
chr17	65898308	65898498	chr17:65898308-65898498@@Human_restTopic11_258
chr17	65898428	65898618	chr17:65898428-65898618@@Human_restTopic11_258
chr17	65898548	65898738	chr17:65898548-65898738@@Human_restTopic11_258
chr17	65898668	65898858	chr17:65898668-65898858@@Human_restTopic11_258
chr17	65898788	65898978	chr17:65898788-65898978@@Human_restTopic11_258
chr17	65898908	65899098	chr17:65898908-65899098@@Human_restTopic11_258
chr17	65899018	65899208	chr17:65899018-65899208@@Human_restTopic11_258
chr12	119259250	119259440	chr12:119259250-119259440@@Human_restTopic11_259
chr12	119259370	119259560	chr12:119259370-119259560@@Human_restTopic11_259
chr12	119259407	119259597	chr12:119259407-119259597@@Human_restTopic11_259
chr2	118887902	118888092	chr2:118887902-118888092@@Human_restTopic11_26
chr2	118888022	118888212	chr2:118888022-118888212@@Human_restTopic11_26
chr2	118888142	118888332	chr2:118888142-118888332@@Human_restTopic11_26
chr2	118888206	118888396	chr2:118888206-118888396@@Human_restTopic11_26
chr2	211464159	211464349	chr2:211464159-211464349@@Human_restTopic11_260
chr2	211464279	211464469	chr2:211464279-211464469@@Human_restTopic11_260
chr2	211464399	211464589	chr2:211464399-211464589@@Human_restTopic11_260
chr2	211464519	211464709	chr2:211464519-211464709@@Human_restTopic11_260
chr2	211464606	211464796	chr2:211464606-211464796@@Human_restTopic11_260
chr3	179262811	179263001	chr3:179262811-179263001@@Human_restTopic11_261
chr3	179262931	179263121	chr3:179262931-179263121@@Human_restTopic11_261
chr3	179263051	179263241	chr3:179263051-179263241@@Human_restTopic11_261
chr3	179263171	179263361	chr3:179263171-179263361@@Human_restTopic11_261
chr3	179263193	179263383	chr3:179263193-179263383@@Human_restTopic11_261
chr15	81487636	81487826	chr15:81487636-81487826@@Human_restTopic11_262
chr15	81487756	81487946	chr15:81487756-81487946@@Human_restTopic11_262
chr15	81487809	81487999	chr15:81487809-81487999@@Human_restTopic11_262
chr2	48652094	48652284	chr2:48652094-48652284@@Human_restTopic11_263
chr2	48652155	48652345	chr2:48652155-48652345@@Human_restTopic11_263
chr7	151165442	151165632	chr7:151165442-151165632@@Human_restTopic11_264
chr7	151165562	151165752	chr7:151165562-151165752@@Human_restTopic11_264
chr7	151165682	151165872	chr7:151165682-151165872@@Human_restTopic11_264
chr7	151165796	151165986	chr7:151165796-151165986@@Human_restTopic11_264
chr6	139043984	139044174	chr6:139043984-139044174@@Human_restTopic11_265
chr6	139044104	139044294	chr6:139044104-139044294@@Human_restTopic11_265
chr6	139044224	139044414	chr6:139044224-139044414@@Human_restTopic11_265
chr6	139044344	139044534	chr6:139044344-139044534@@Human_restTopic11_265
chr6	139044464	139044654	chr6:139044464-139044654@@Human_restTopic11_265
chr6	139044478	139044668	chr6:139044478-139044668@@Human_restTopic11_265
chr8	29436949	29437139	chr8:29436949-29437139@@Human_restTopic11_266
chr8	29437069	29437259	chr8:29437069-29437259@@Human_restTopic11_266
chr8	29437123	29437313	chr8:29437123-29437313@@Human_restTopic11_266
chr3	128973567	128973757	chr3:128973567-128973757@@Human_restTopic11_267
chr3	128973687	128973877	chr3:128973687-128973877@@Human_restTopic11_267
chr3	128973807	128973997	chr3:128973807-128973997@@Human_restTopic11_267
chr3	128973883	128974073	chr3:128973883-128974073@@Human_restTopic11_267
chr16	52112600	52112790	chr16:52112600-52112790@@Human_restTopic11_268
chr16	52112720	52112910	chr16:52112720-52112910@@Human_restTopic11_268
chr16	52112840	52113030	chr16:52112840-52113030@@Human_restTopic11_268
chr16	52112960	52113150	chr16:52112960-52113150@@Human_restTopic11_268
chr16	52113080	52113270	chr16:52113080-52113270@@Human_restTopic11_268
chr16	52113200	52113390	chr16:52113200-52113390@@Human_restTopic11_268
chr16	52113320	52113510	chr16:52113320-52113510@@Human_restTopic11_268
chr16	52113400	52113590	chr16:52113400-52113590@@Human_restTopic11_268
chr19	5909967	5910157	chr19:5909967-5910157@@Human_restTopic11_269
chr19	5910087	5910277	chr19:5910087-5910277@@Human_restTopic11_269
chr19	5910174	5910364	chr19:5910174-5910364@@Human_restTopic11_269
chr3	24337932	24338122	chr3:24337932-24338122@@Human_restTopic11_27
chr3	24338052	24338242	chr3:24338052-24338242@@Human_restTopic11_27
chr3	24338111	24338301	chr3:24338111-24338301@@Human_restTopic11_27
chr10	93870007	93870197	chr10:93870007-93870197@@Human_restTopic11_270
chr10	93870127	93870317	chr10:93870127-93870317@@Human_restTopic11_270
chr10	93870247	93870437	chr10:93870247-93870437@@Human_restTopic11_270
chr10	93870367	93870557	chr10:93870367-93870557@@Human_restTopic11_270
chr10	93870487	93870677	chr10:93870487-93870677@@Human_restTopic11_270
chr10	93870555	93870745	chr10:93870555-93870745@@Human_restTopic11_270
chr1	235253700	235253890	chr1:235253700-235253890@@Human_restTopic11_271
chr1	235253820	235254010	chr1:235253820-235254010@@Human_restTopic11_271
chr1	235253940	235254130	chr1:235253940-235254130@@Human_restTopic11_271
chr1	235254060	235254250	chr1:235254060-235254250@@Human_restTopic11_271
chr1	235254180	235254370	chr1:235254180-235254370@@Human_restTopic11_271
chr1	235254200	235254390	chr1:235254200-235254390@@Human_restTopic11_271
chr1	242169333	242169523	chr1:242169333-242169523@@Human_restTopic11_272
chr1	242169453	242169643	chr1:242169453-242169643@@Human_restTopic11_272
chr1	242169573	242169763	chr1:242169573-242169763@@Human_restTopic11_272
chr1	242169590	242169780	chr1:242169590-242169780@@Human_restTopic11_272
chr2	112743852	112744042	chr2:112743852-112744042@@Human_restTopic11_273
chr2	112743972	112744162	chr2:112743972-112744162@@Human_restTopic11_273
chr2	112744092	112744282	chr2:112744092-112744282@@Human_restTopic11_273
chr2	112744212	112744402	chr2:112744212-112744402@@Human_restTopic11_273
chr2	112744315	112744505	chr2:112744315-112744505@@Human_restTopic11_273
chr4	2143554	2143744	chr4:2143554-2143744@@Human_restTopic11_274
chr4	2143674	2143864	chr4:2143674-2143864@@Human_restTopic11_274
chr4	2143794	2143984	chr4:2143794-2143984@@Human_restTopic11_274
chr4	2143912	2144102	chr4:2143912-2144102@@Human_restTopic11_274
chr3	135355430	135355620	chr3:135355430-135355620@@Human_restTopic11_275
chr3	135355550	135355740	chr3:135355550-135355740@@Human_restTopic11_275
chr3	135355670	135355860	chr3:135355670-135355860@@Human_restTopic11_275
chr3	135355790	135355980	chr3:135355790-135355980@@Human_restTopic11_275
chr3	135355910	135356100	chr3:135355910-135356100@@Human_restTopic11_275
chr3	135356006	135356196	chr3:135356006-135356196@@Human_restTopic11_275
chr3	154733508	154733698	chr3:154733508-154733698@@Human_restTopic11_276
chr3	154733628	154733818	chr3:154733628-154733818@@Human_restTopic11_276
chr3	154733748	154733938	chr3:154733748-154733938@@Human_restTopic11_276
chr3	154733868	154734058	chr3:154733868-154734058@@Human_restTopic11_276
chr3	154733877	154734067	chr3:154733877-154734067@@Human_restTopic11_276
chr5	5069925	5070115	chr5:5069925-5070115@@Human_restTopic11_277
chr5	5070045	5070235	chr5:5070045-5070235@@Human_restTopic11_277
chr5	5070165	5070355	chr5:5070165-5070355@@Human_restTopic11_277
chr5	5070285	5070475	chr5:5070285-5070475@@Human_restTopic11_277
chr5	5070316	5070506	chr5:5070316-5070506@@Human_restTopic11_277
chr5	154327229	154327419	chr5:154327229-154327419@@Human_restTopic11_278
chr5	154327349	154327539	chr5:154327349-154327539@@Human_restTopic11_278
chr5	154327469	154327659	chr5:154327469-154327659@@Human_restTopic11_278
chr5	154327541	154327731	chr5:154327541-154327731@@Human_restTopic11_278
chr3	185406425	185406615	chr3:185406425-185406615@@Human_restTopic11_279
chr3	185406545	185406735	chr3:185406545-185406735@@Human_restTopic11_279
chr3	185406665	185406855	chr3:185406665-185406855@@Human_restTopic11_279
chr3	185406785	185406975	chr3:185406785-185406975@@Human_restTopic11_279
chr3	185406905	185407095	chr3:185406905-185407095@@Human_restTopic11_279
chr3	185406986	185407176	chr3:185406986-185407176@@Human_restTopic11_279
chr15	63615934	63616124	chr15:63615934-63616124@@Human_restTopic11_28
chr15	63616054	63616244	chr15:63616054-63616244@@Human_restTopic11_28
chr15	63616174	63616364	chr15:63616174-63616364@@Human_restTopic11_28
chr15	63616294	63616484	chr15:63616294-63616484@@Human_restTopic11_28
chr15	63616414	63616604	chr15:63616414-63616604@@Human_restTopic11_28
chr15	63616534	63616724	chr15:63616534-63616724@@Human_restTopic11_28
chr15	63616555	63616745	chr15:63616555-63616745@@Human_restTopic11_28
chr7	140828133	140828323	chr7:140828133-140828323@@Human_restTopic11_280
chr7	140828253	140828443	chr7:140828253-140828443@@Human_restTopic11_280
chr7	140828373	140828563	chr7:140828373-140828563@@Human_restTopic11_280
chr7	140828493	140828683	chr7:140828493-140828683@@Human_restTopic11_280
chr7	140828613	140828803	chr7:140828613-140828803@@Human_restTopic11_280
chr7	140828733	140828923	chr7:140828733-140828923@@Human_restTopic11_280
chr7	140828777	140828967	chr7:140828777-140828967@@Human_restTopic11_280
chr2	54271137	54271327	chr2:54271137-54271327@@Human_restTopic11_281
chr2	54271257	54271447	chr2:54271257-54271447@@Human_restTopic11_281
chr2	54271329	54271519	chr2:54271329-54271519@@Human_restTopic11_281
chr8	101514412	101514602	chr8:101514412-101514602@@Human_restTopic11_282
chr8	101514532	101514722	chr8:101514532-101514722@@Human_restTopic11_282
chr8	101514652	101514842	chr8:101514652-101514842@@Human_restTopic11_282
chr8	101514772	101514962	chr8:101514772-101514962@@Human_restTopic11_282
chr8	101514892	101515082	chr8:101514892-101515082@@Human_restTopic11_282
chr8	101514964	101515154	chr8:101514964-101515154@@Human_restTopic11_282
chr6	57414826	57415016	chr6:57414826-57415016@@Human_restTopic11_283
chr6	57414946	57415136	chr6:57414946-57415136@@Human_restTopic11_283
chr6	57415066	57415256	chr6:57415066-57415256@@Human_restTopic11_283
chr6	57415186	57415376	chr6:57415186-57415376@@Human_restTopic11_283
chr6	57415189	57415379	chr6:57415189-57415379@@Human_restTopic11_283
chr14	32355426	32355616	chr14:32355426-32355616@@Human_restTopic11_284
chr14	32355546	32355736	chr14:32355546-32355736@@Human_restTopic11_284
chr14	32355666	32355856	chr14:32355666-32355856@@Human_restTopic11_284
chr14	32355763	32355953	chr14:32355763-32355953@@Human_restTopic11_284
chr3	156610419	156610609	chr3:156610419-156610609@@Human_restTopic11_285
chr3	156610539	156610729	chr3:156610539-156610729@@Human_restTopic11_285
chr3	156610659	156610849	chr3:156610659-156610849@@Human_restTopic11_285
chr3	156610714	156610904	chr3:156610714-156610904@@Human_restTopic11_285
chr6	167444714	167444904	chr6:167444714-167444904@@Human_restTopic11_286
chr6	167444834	167445024	chr6:167444834-167445024@@Human_restTopic11_286
chr6	167444954	167445144	chr6:167444954-167445144@@Human_restTopic11_286
chr6	167445074	167445264	chr6:167445074-167445264@@Human_restTopic11_286
chr6	167445107	167445297	chr6:167445107-167445297@@Human_restTopic11_286
chr16	31302581	31302771	chr16:31302581-31302771@@Human_restTopic11_287
chr16	31302701	31302891	chr16:31302701-31302891@@Human_restTopic11_287
chr16	31302821	31303011	chr16:31302821-31303011@@Human_restTopic11_287
chr16	31302941	31303131	chr16:31302941-31303131@@Human_restTopic11_287
chr16	31303024	31303214	chr16:31303024-31303214@@Human_restTopic11_287
chr3	105768649	105768839	chr3:105768649-105768839@@Human_restTopic11_288
chr3	105768769	105768959	chr3:105768769-105768959@@Human_restTopic11_288
chr3	105768889	105769079	chr3:105768889-105769079@@Human_restTopic11_288
chr3	105768970	105769160	chr3:105768970-105769160@@Human_restTopic11_288
chr7	106968400	106968590	chr7:106968400-106968590@@Human_restTopic11_289
chr7	106968520	106968710	chr7:106968520-106968710@@Human_restTopic11_289
chr7	106968640	106968830	chr7:106968640-106968830@@Human_restTopic11_289
chr7	106968754	106968944	chr7:106968754-106968944@@Human_restTopic11_289
chr15	100526596	100526786	chr15:100526596-100526786@@Human_restTopic11_29
chr15	100526716	100526906	chr15:100526716-100526906@@Human_restTopic11_29
chr15	100526836	100527026	chr15:100526836-100527026@@Human_restTopic11_29
chr15	100526956	100527146	chr15:100526956-100527146@@Human_restTopic11_29
chr15	100526985	100527175	chr15:100526985-100527175@@Human_restTopic11_29
chr3	196350739	196350929	chr3:196350739-196350929@@Human_restTopic11_290
chr3	196350859	196351049	chr3:196350859-196351049@@Human_restTopic11_290
chr3	196350979	196351169	chr3:196350979-196351169@@Human_restTopic11_290
chr3	196351099	196351289	chr3:196351099-196351289@@Human_restTopic11_290
chr3	196351219	196351409	chr3:196351219-196351409@@Human_restTopic11_290
chr3	196351339	196351529	chr3:196351339-196351529@@Human_restTopic11_290
chr3	196351459	196351649	chr3:196351459-196351649@@Human_restTopic11_290
chr3	196351579	196351769	chr3:196351579-196351769@@Human_restTopic11_290
chr3	196351699	196351889	chr3:196351699-196351889@@Human_restTopic11_290
chr3	196351819	196352009	chr3:196351819-196352009@@Human_restTopic11_290
chr3	196351939	196352129	chr3:196351939-196352129@@Human_restTopic11_290
chr3	196352059	196352249	chr3:196352059-196352249@@Human_restTopic11_290
chr3	196352179	196352369	chr3:196352179-196352369@@Human_restTopic11_290
chr3	196352299	196352489	chr3:196352299-196352489@@Human_restTopic11_290
chr3	196352419	196352609	chr3:196352419-196352609@@Human_restTopic11_290
chr3	196352539	196352729	chr3:196352539-196352729@@Human_restTopic11_290
chr3	196352548	196352738	chr3:196352548-196352738@@Human_restTopic11_290
chr6	11330697	11330887	chr6:11330697-11330887@@Human_restTopic11_291
chr6	11330817	11331007	chr6:11330817-11331007@@Human_restTopic11_291
chr6	11330937	11331127	chr6:11330937-11331127@@Human_restTopic11_291
chr6	11330941	11331131	chr6:11330941-11331131@@Human_restTopic11_291
chr2	152049078	152049268	chr2:152049078-152049268@@Human_restTopic11_292
chr2	152049198	152049388	chr2:152049198-152049388@@Human_restTopic11_292
chr2	152049318	152049508	chr2:152049318-152049508@@Human_restTopic11_292
chr2	152049421	152049611	chr2:152049421-152049611@@Human_restTopic11_292
chr5	110681405	110681595	chr5:110681405-110681595@@Human_restTopic11_293
chr5	110681525	110681715	chr5:110681525-110681715@@Human_restTopic11_293
chr5	110681645	110681835	chr5:110681645-110681835@@Human_restTopic11_293
chr5	110681711	110681901	chr5:110681711-110681901@@Human_restTopic11_293
chr8	98363467	98363657	chr8:98363467-98363657@@Human_restTopic11_294
chr8	98363587	98363777	chr8:98363587-98363777@@Human_restTopic11_294
chr8	98363707	98363897	chr8:98363707-98363897@@Human_restTopic11_294
chr8	98363827	98364017	chr8:98363827-98364017@@Human_restTopic11_294
chr8	98363918	98364108	chr8:98363918-98364108@@Human_restTopic11_294
chr1	170488131	170488321	chr1:170488131-170488321@@Human_restTopic11_295
chr1	170488251	170488441	chr1:170488251-170488441@@Human_restTopic11_295
chr1	170488371	170488561	chr1:170488371-170488561@@Human_restTopic11_295
chr1	170488383	170488573	chr1:170488383-170488573@@Human_restTopic11_295
chr18	644437	644627	chr18:644437-644627@@Human_restTopic11_296
chr18	644557	644747	chr18:644557-644747@@Human_restTopic11_296
chr18	644650	644840	chr18:644650-644840@@Human_restTopic11_296
chr7	111571930	111572120	chr7:111571930-111572120@@Human_restTopic11_297
chr7	111572050	111572240	chr7:111572050-111572240@@Human_restTopic11_297
chr7	111572170	111572360	chr7:111572170-111572360@@Human_restTopic11_297
chr7	111572290	111572480	chr7:111572290-111572480@@Human_restTopic11_297
chr7	111572292	111572482	chr7:111572292-111572482@@Human_restTopic11_297
chrX	2749434	2749624	chrX:2749434-2749624@@Human_restTopic11_298
chrX	2749554	2749744	chrX:2749554-2749744@@Human_restTopic11_298
chrX	2749674	2749864	chrX:2749674-2749864@@Human_restTopic11_298
chrX	2749794	2749984	chrX:2749794-2749984@@Human_restTopic11_298
chrX	2749905	2750095	chrX:2749905-2750095@@Human_restTopic11_298
chr18	21634080	21634270	chr18:21634080-21634270@@Human_restTopic11_299
chr18	21634200	21634390	chr18:21634200-21634390@@Human_restTopic11_299
chr18	21634278	21634468	chr18:21634278-21634468@@Human_restTopic11_299
chr2	133075971	133076161	chr2:133075971-133076161@@Human_restTopic11_3
chr2	133076091	133076281	chr2:133076091-133076281@@Human_restTopic11_3
chr2	133076211	133076401	chr2:133076211-133076401@@Human_restTopic11_3
chr2	133076331	133076521	chr2:133076331-133076521@@Human_restTopic11_3
chr2	133076451	133076641	chr2:133076451-133076641@@Human_restTopic11_3
chr2	133076571	133076761	chr2:133076571-133076761@@Human_restTopic11_3
chr2	133076665	133076855	chr2:133076665-133076855@@Human_restTopic11_3
chr9	111207994	111208184	chr9:111207994-111208184@@Human_restTopic11_30
chr9	111208114	111208304	chr9:111208114-111208304@@Human_restTopic11_30
chr9	111208234	111208424	chr9:111208234-111208424@@Human_restTopic11_30
chr9	111208259	111208449	chr9:111208259-111208449@@Human_restTopic11_30
chr2	79812793	79812983	chr2:79812793-79812983@@Human_restTopic11_300
chr2	79812913	79813103	chr2:79812913-79813103@@Human_restTopic11_300
chr2	79813033	79813223	chr2:79813033-79813223@@Human_restTopic11_300
chr2	79813153	79813343	chr2:79813153-79813343@@Human_restTopic11_300
chr2	79813235	79813425	chr2:79813235-79813425@@Human_restTopic11_300
chr1	217083827	217084017	chr1:217083827-217084017@@Human_restTopic11_301
chr1	217083947	217084137	chr1:217083947-217084137@@Human_restTopic11_301
chr1	217083983	217084173	chr1:217083983-217084173@@Human_restTopic11_301
chr6	109657361	109657551	chr6:109657361-109657551@@Human_restTopic11_302
chr6	109657481	109657671	chr6:109657481-109657671@@Human_restTopic11_302
chr6	109657523	109657713	chr6:109657523-109657713@@Human_restTopic11_302
chr7	77079934	77080124	chr7:77079934-77080124@@Human_restTopic11_303
chr7	77080054	77080244	chr7:77080054-77080244@@Human_restTopic11_303
chr7	77080085	77080275	chr7:77080085-77080275@@Human_restTopic11_303
chr1	171802331	171802521	chr1:171802331-171802521@@Human_restTopic11_304
chr1	171802451	171802641	chr1:171802451-171802641@@Human_restTopic11_304
chr1	171802571	171802761	chr1:171802571-171802761@@Human_restTopic11_304
chr1	171802691	171802881	chr1:171802691-171802881@@Human_restTopic11_304
chr1	171802811	171803001	chr1:171802811-171803001@@Human_restTopic11_304
chr1	171802839	171803029	chr1:171802839-171803029@@Human_restTopic11_304
chr17	79336337	79336527	chr17:79336337-79336527@@Human_restTopic11_305
chr17	79336457	79336647	chr17:79336457-79336647@@Human_restTopic11_305
chr17	79336490	79336680	chr17:79336490-79336680@@Human_restTopic11_305
chr5	98341153	98341343	chr5:98341153-98341343@@Human_restTopic11_306
chr5	98341273	98341463	chr5:98341273-98341463@@Human_restTopic11_306
chr5	98341322	98341512	chr5:98341322-98341512@@Human_restTopic11_306
chr4	154090988	154091178	chr4:154090988-154091178@@Human_restTopic11_307
chr4	154091108	154091298	chr4:154091108-154091298@@Human_restTopic11_307
chr4	154091154	154091344	chr4:154091154-154091344@@Human_restTopic11_307
chr16	21520424	21520614	chr16:21520424-21520614@@Human_restTopic11_308
chr16	21520535	21520725	chr16:21520535-21520725@@Human_restTopic11_308
chr11	48966910	48967100	chr11:48966910-48967100@@Human_restTopic11_309
chr11	48967030	48967220	chr11:48967030-48967220@@Human_restTopic11_309
chr11	48967150	48967340	chr11:48967150-48967340@@Human_restTopic11_309
chr11	48967270	48967460	chr11:48967270-48967460@@Human_restTopic11_309
chr11	48967390	48967580	chr11:48967390-48967580@@Human_restTopic11_309
chr11	48967510	48967700	chr11:48967510-48967700@@Human_restTopic11_309
chr11	48967570	48967760	chr11:48967570-48967760@@Human_restTopic11_309
chr3	32461508	32461698	chr3:32461508-32461698@@Human_restTopic11_31
chr3	32461628	32461818	chr3:32461628-32461818@@Human_restTopic11_31
chr3	32461748	32461938	chr3:32461748-32461938@@Human_restTopic11_31
chr3	32461868	32462058	chr3:32461868-32462058@@Human_restTopic11_31
chr3	32461870	32462060	chr3:32461870-32462060@@Human_restTopic11_31
chr9	89872002	89872192	chr9:89872002-89872192@@Human_restTopic11_310
chr9	89872122	89872312	chr9:89872122-89872312@@Human_restTopic11_310
chr9	89872242	89872432	chr9:89872242-89872432@@Human_restTopic11_310
chr9	89872281	89872471	chr9:89872281-89872471@@Human_restTopic11_310
chr6	28347978	28348168	chr6:28347978-28348168@@Human_restTopic11_311
chr6	28348098	28348288	chr6:28348098-28348288@@Human_restTopic11_311
chr6	28348218	28348408	chr6:28348218-28348408@@Human_restTopic11_311
chr6	28348338	28348528	chr6:28348338-28348528@@Human_restTopic11_311
chr6	28348371	28348561	chr6:28348371-28348561@@Human_restTopic11_311
chr15	49381201	49381391	chr15:49381201-49381391@@Human_restTopic11_312
chr15	49381321	49381511	chr15:49381321-49381511@@Human_restTopic11_312
[truncated: 5,322 more rows]

## Sheet: SOX-MITF combinations library
-75 bp	-50 bp	-25 bp	Center	25bp	50bp	Number of SOX	Number of MITF		Name	Sequence
[truncated: 50 more rows]

[truncated: 1 more sheets: Luciferase assay]
