# Supplementary figures and images for: Analysis of long and short enhancers in melanoma cell states
Source: eLife journal article supplement (doi:10.7554/elife.71735), 2021-12-07

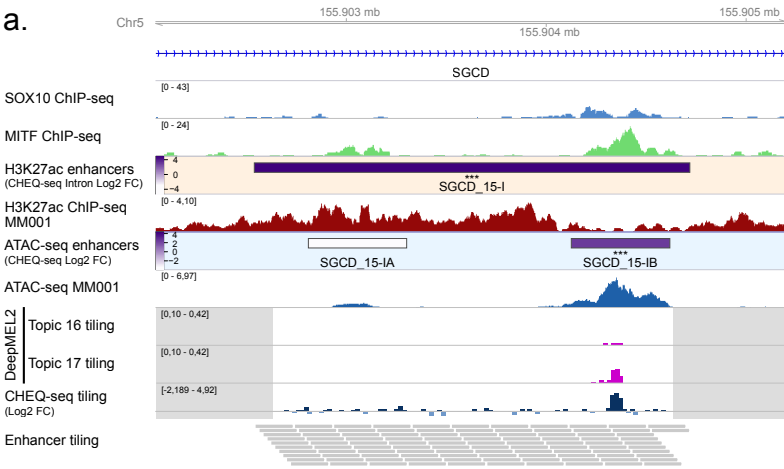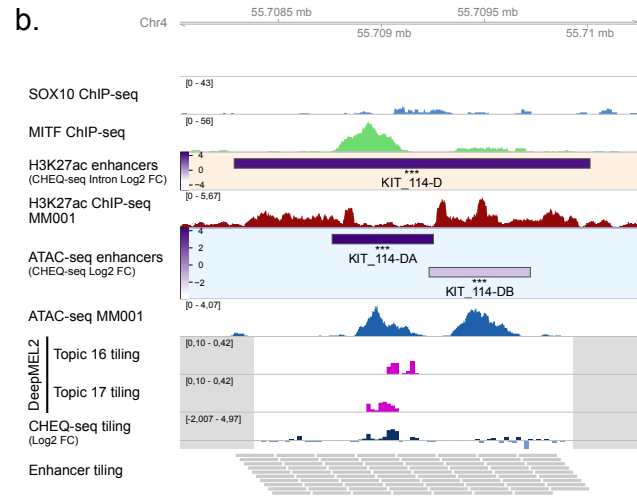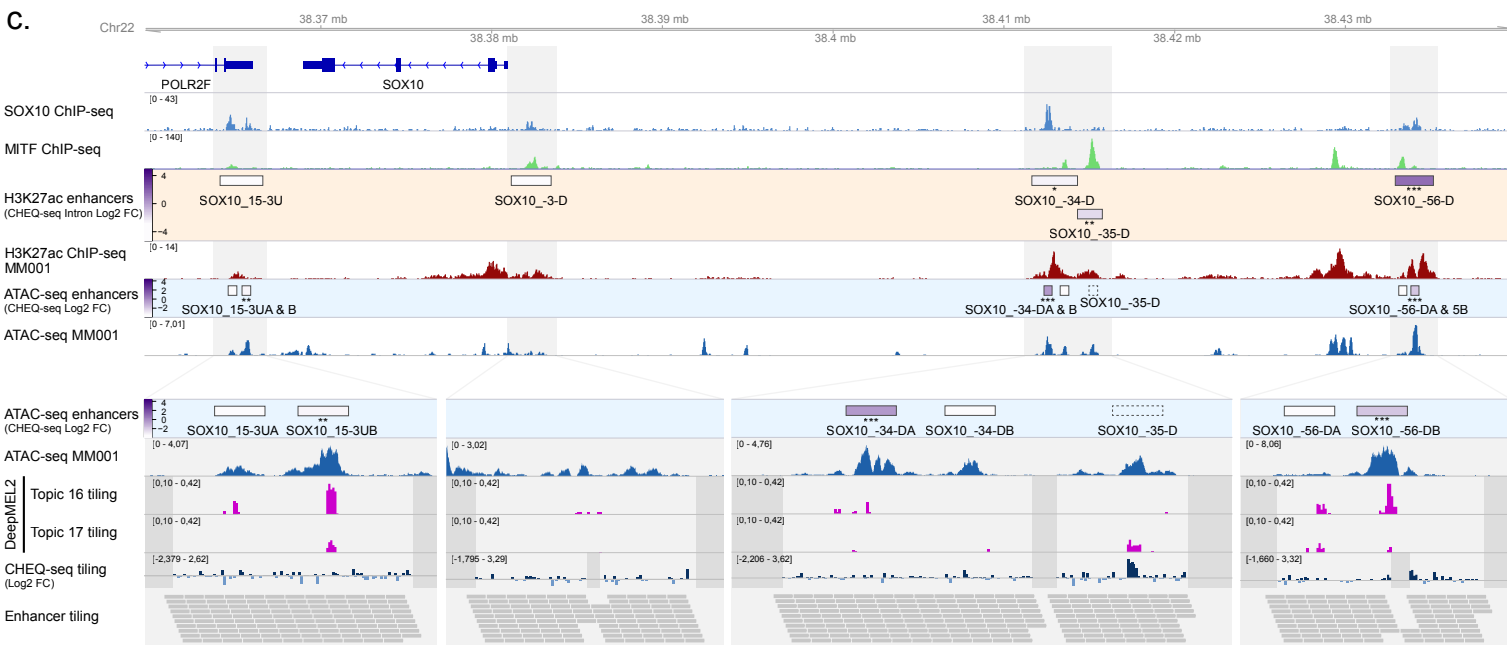

Supplement: supp [file elife-71735-supp-v1.zip]

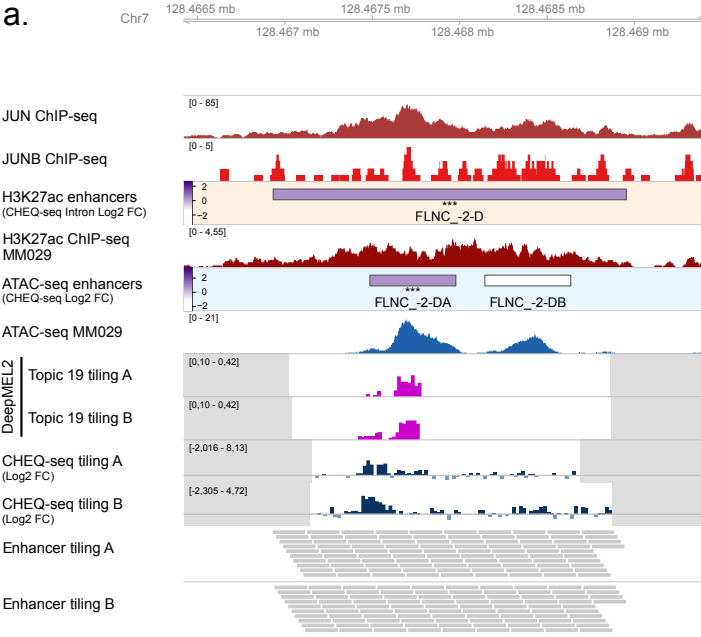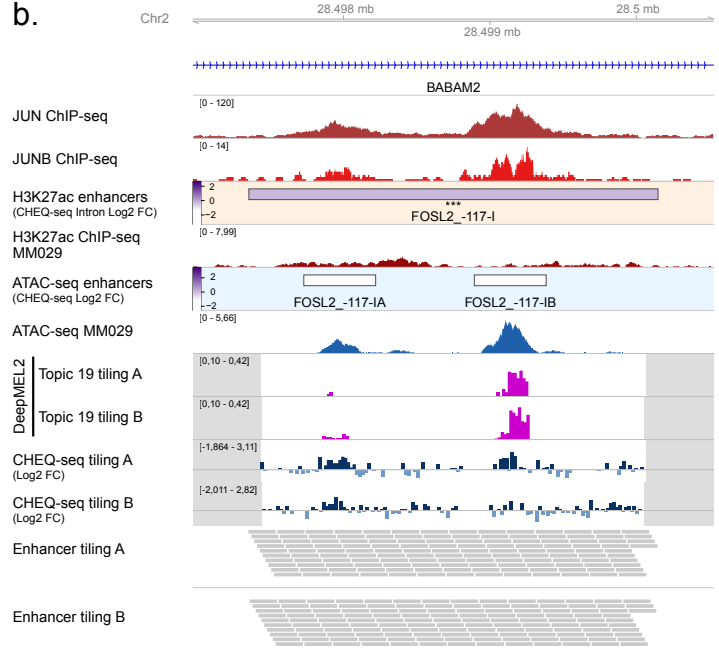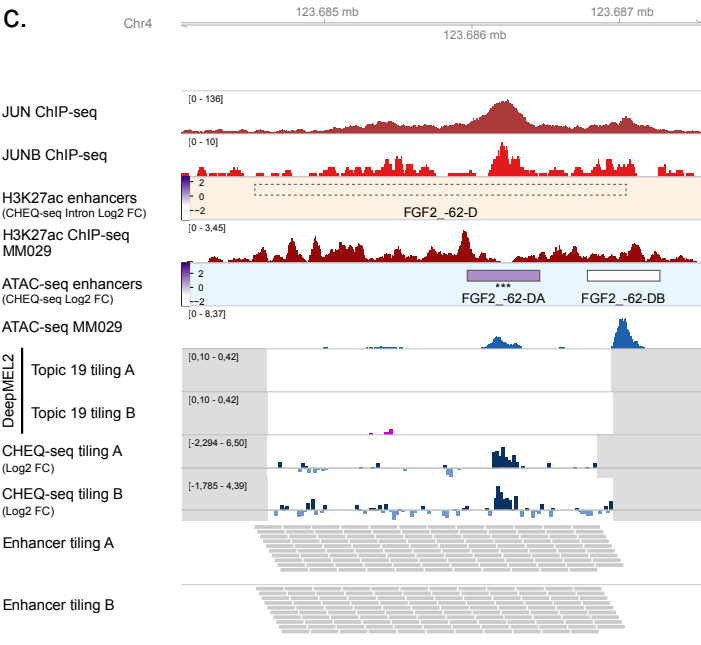

Supplement: supp [file elife-71735-supp-v1.zip]

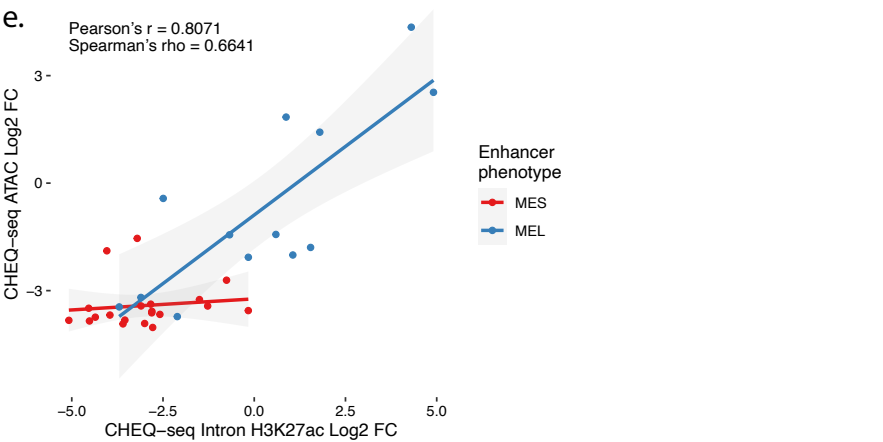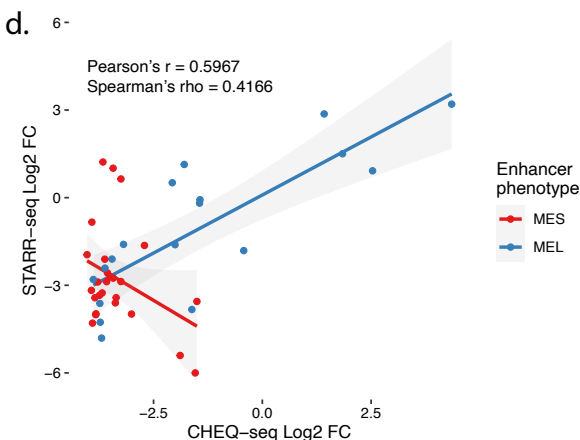

Supplement: supp [file elife-71735-supp-v1.zip]

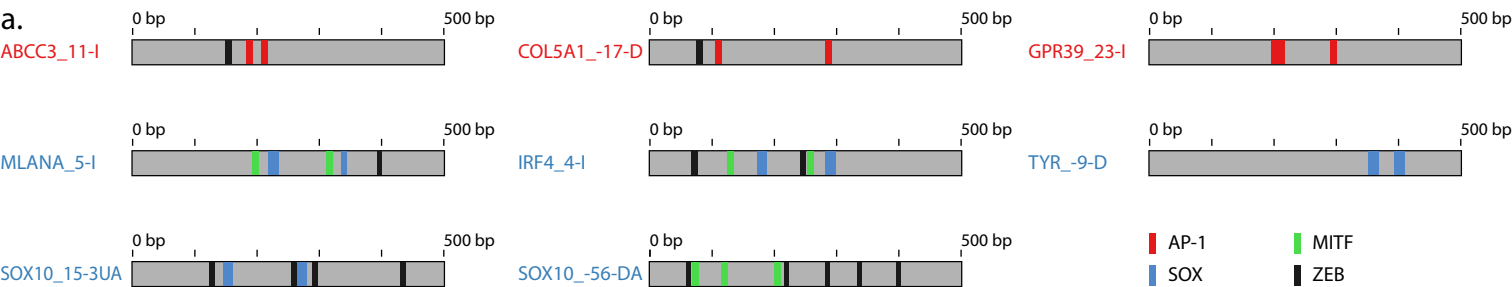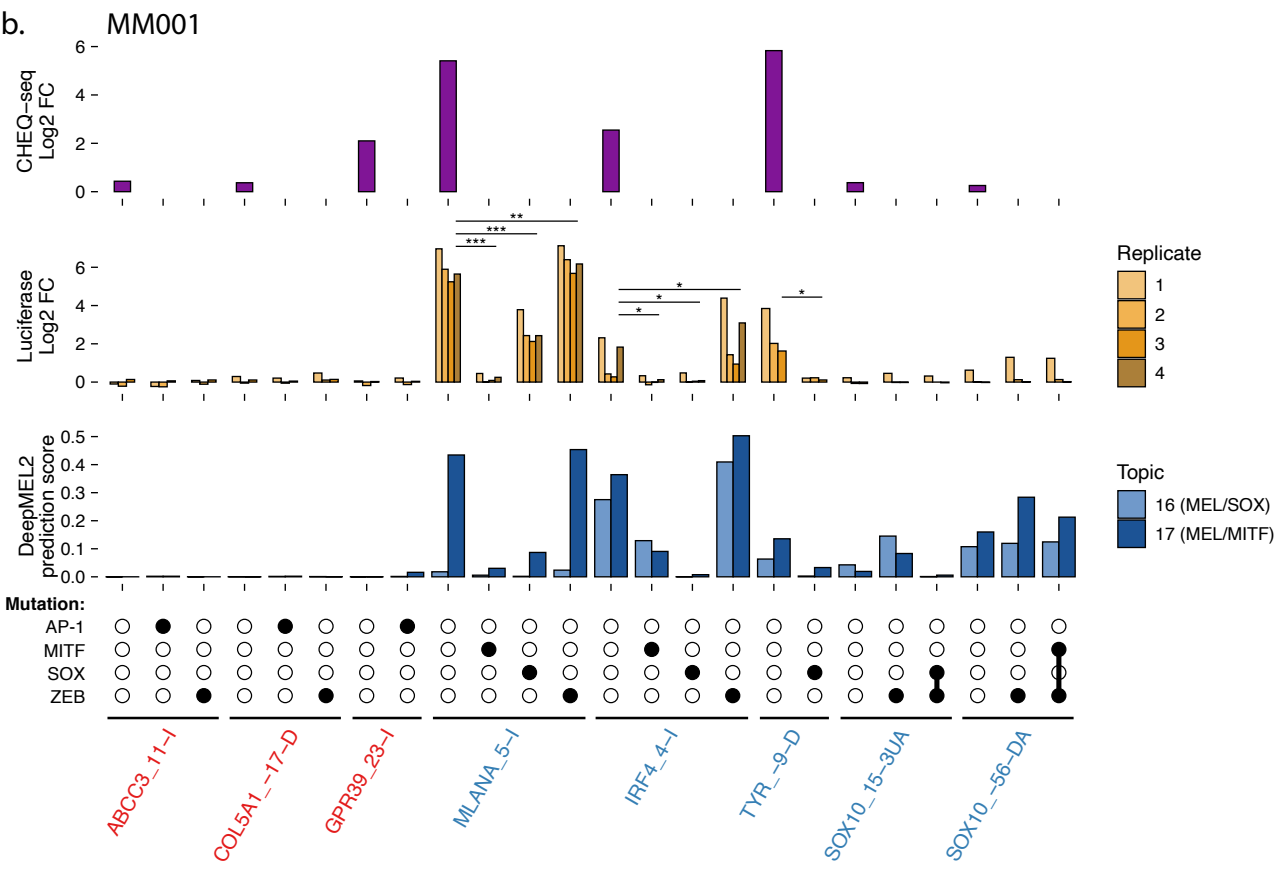

Supplement: supp [file elife-71735-supp-v1.zip]

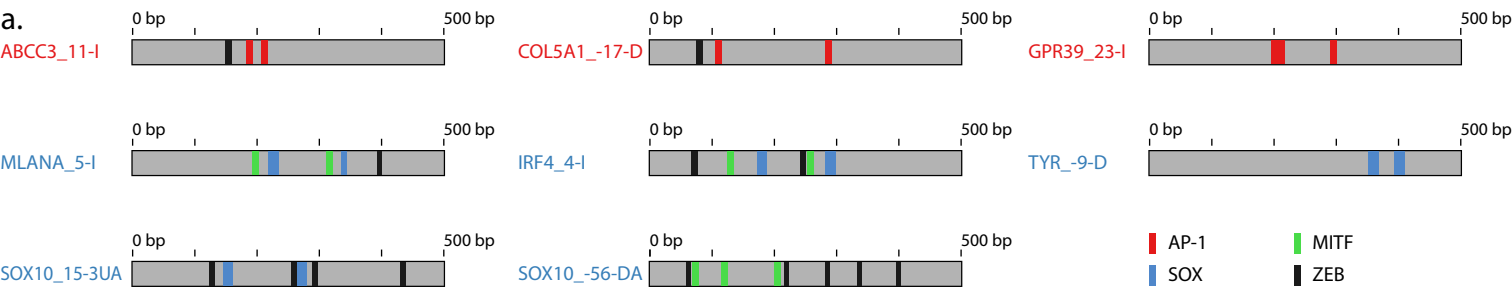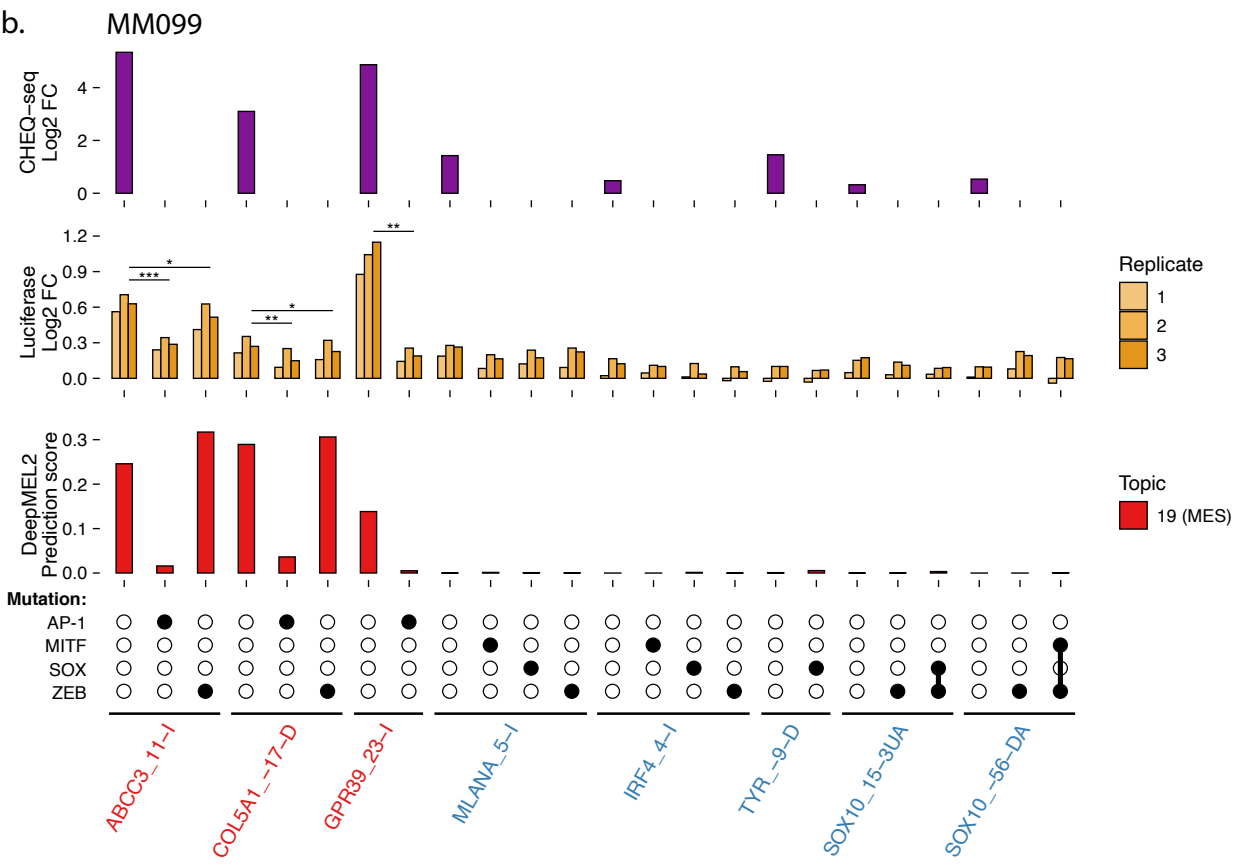

Supplement: supp [file elife-71735-supp-v1.zip]

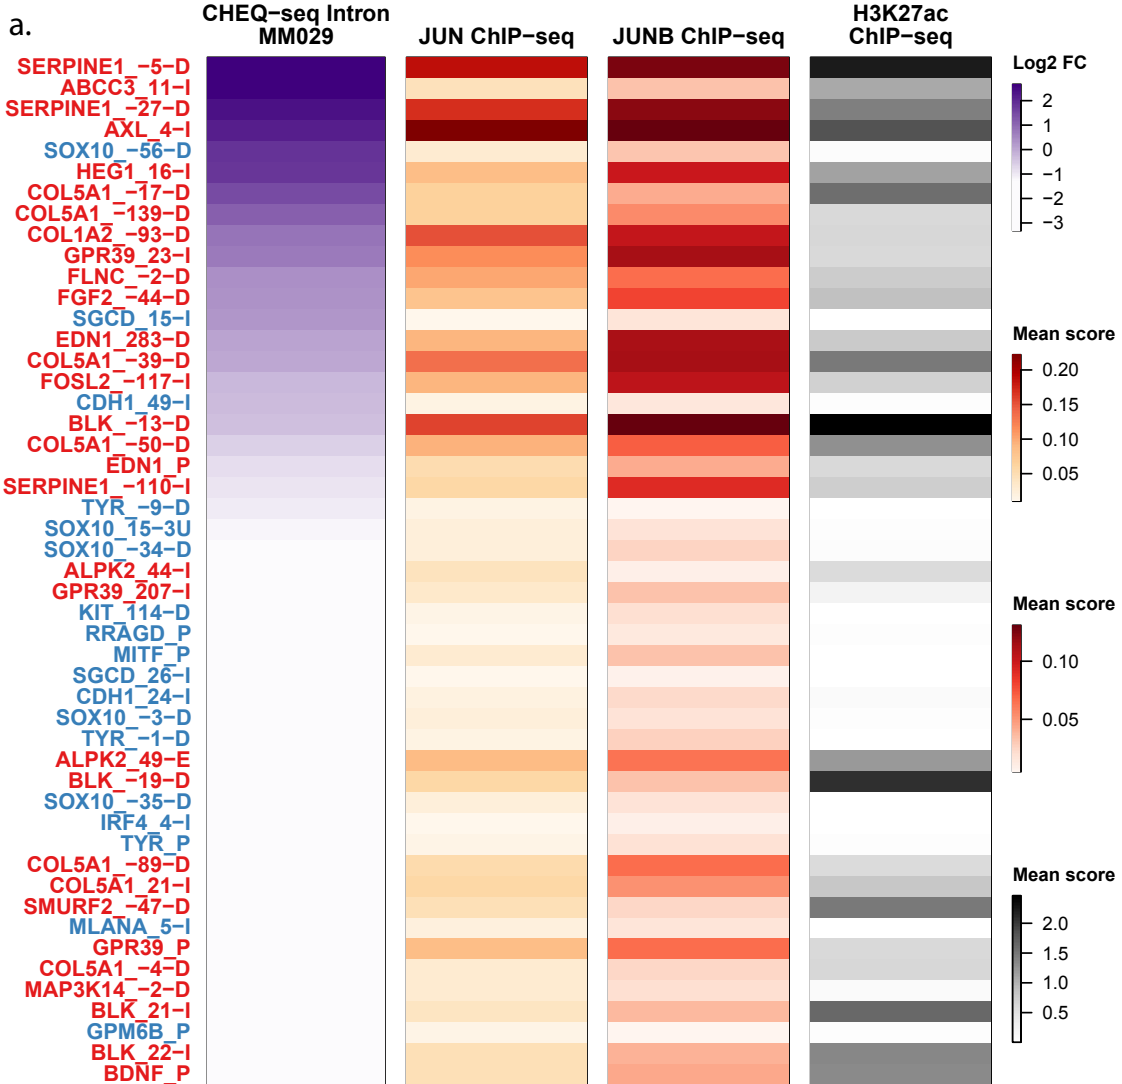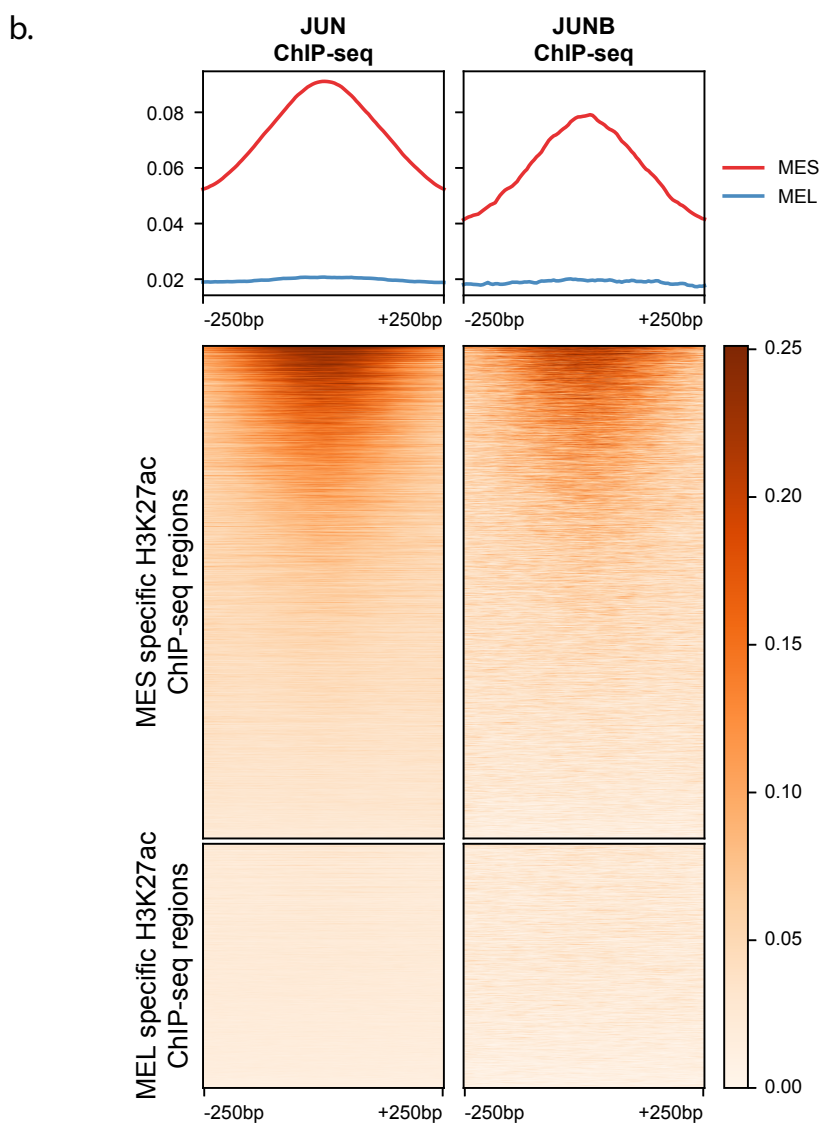

Supplement: supp [file elife-71735-supp-v1.zip]

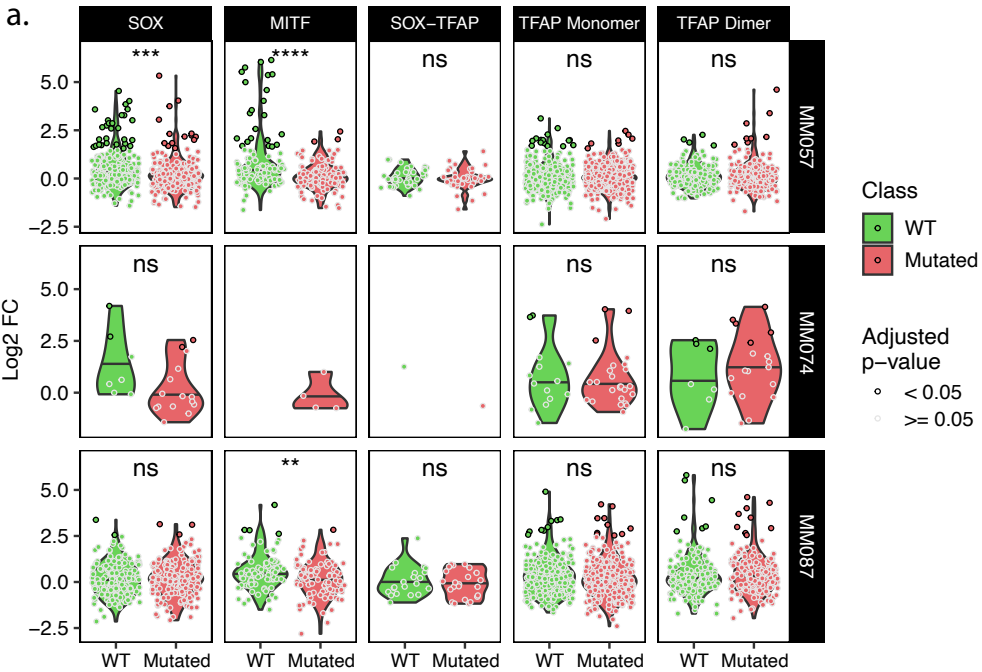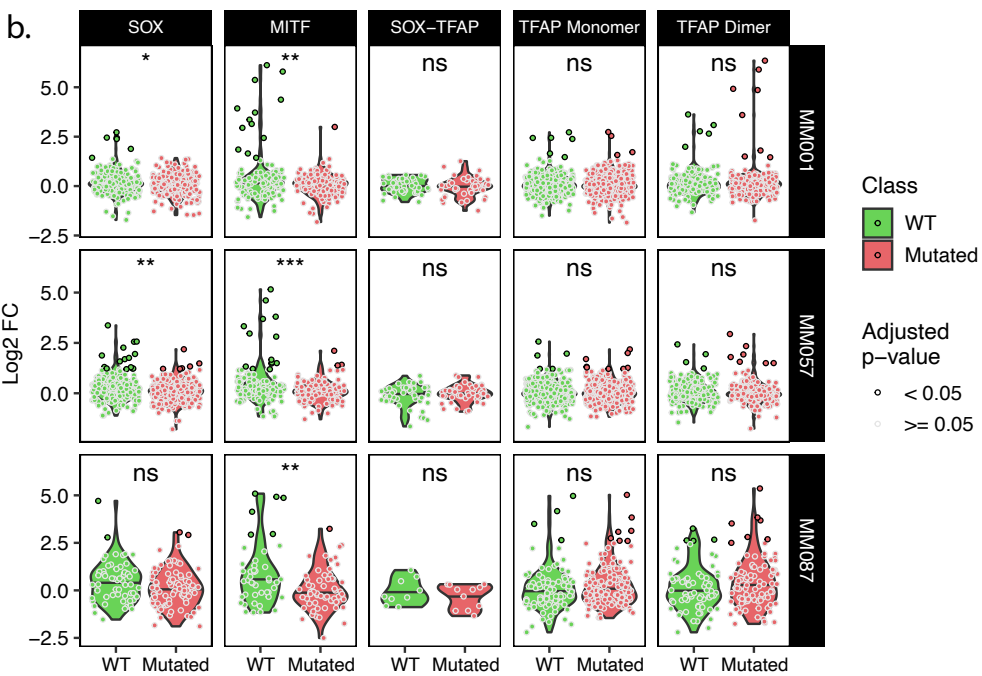

Supplement: supp [file elife-71735-supp-v1.zip]

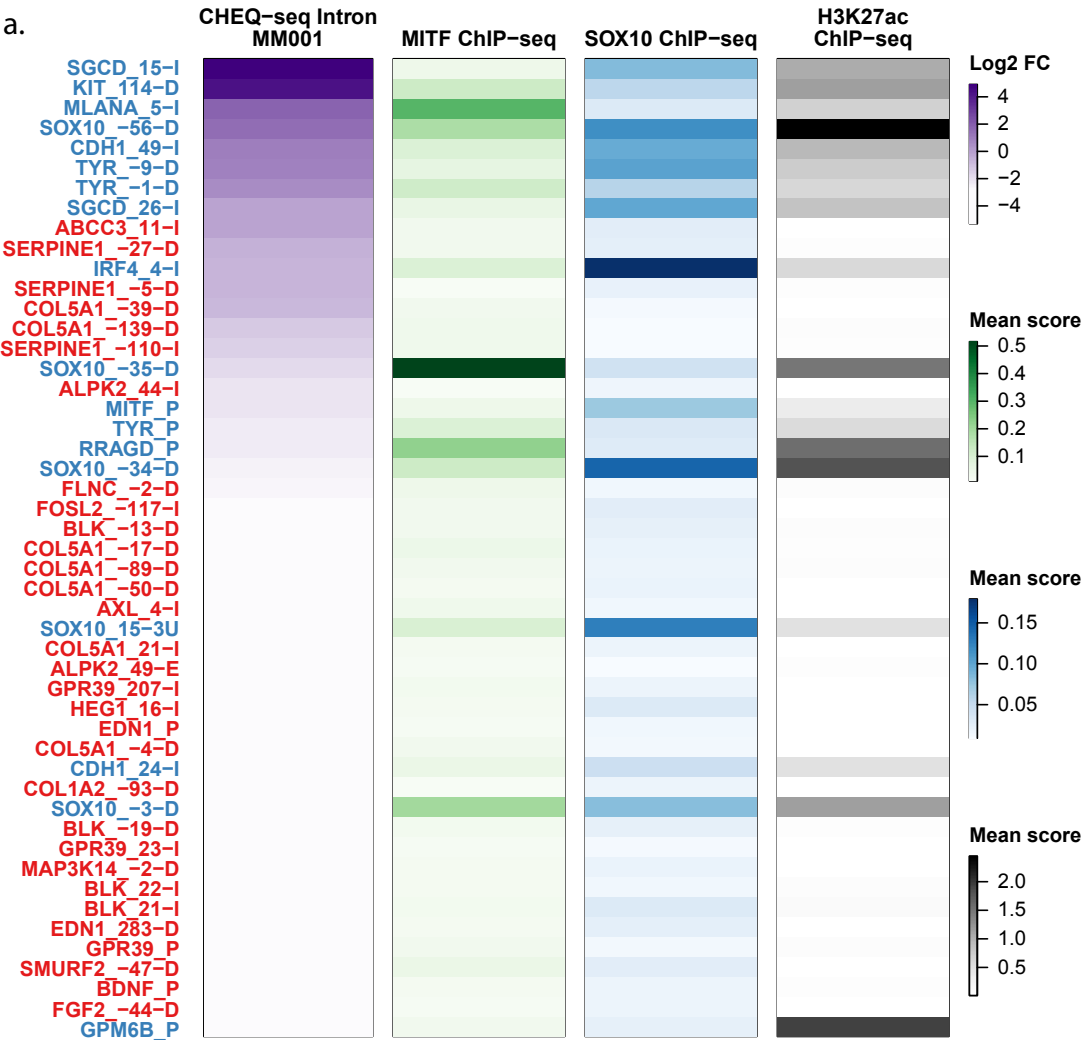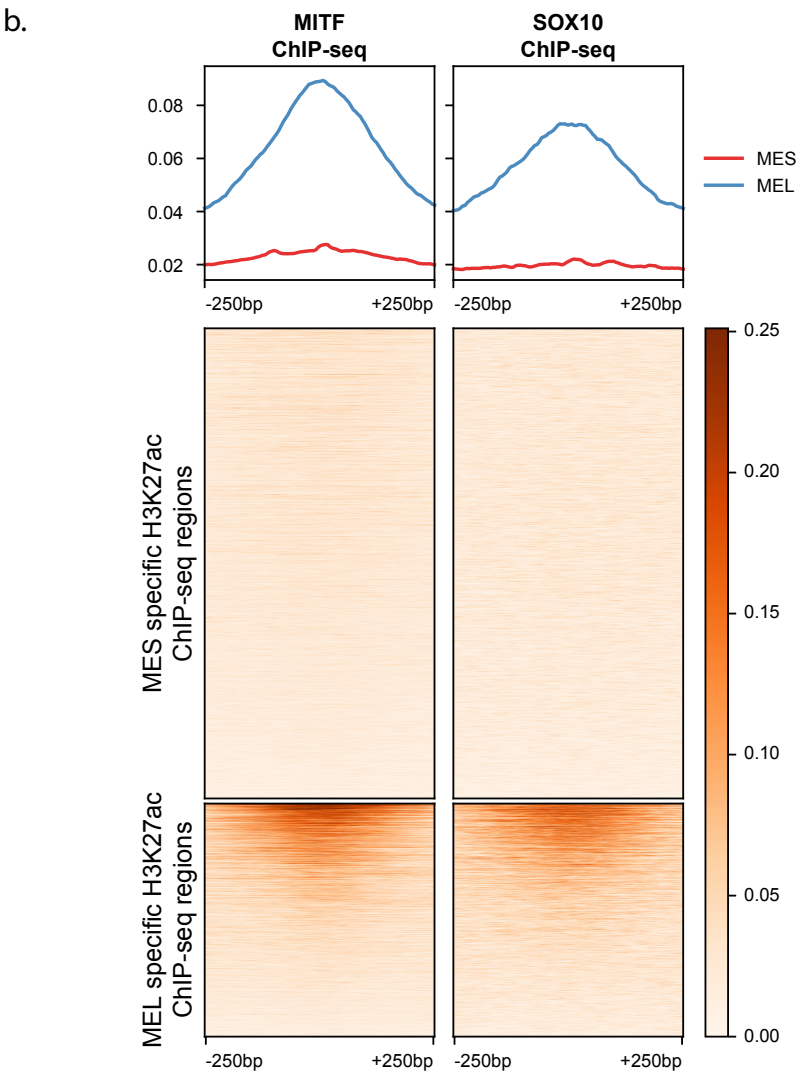

Supplement: supp [file elife-71735-supp-v1.zip]

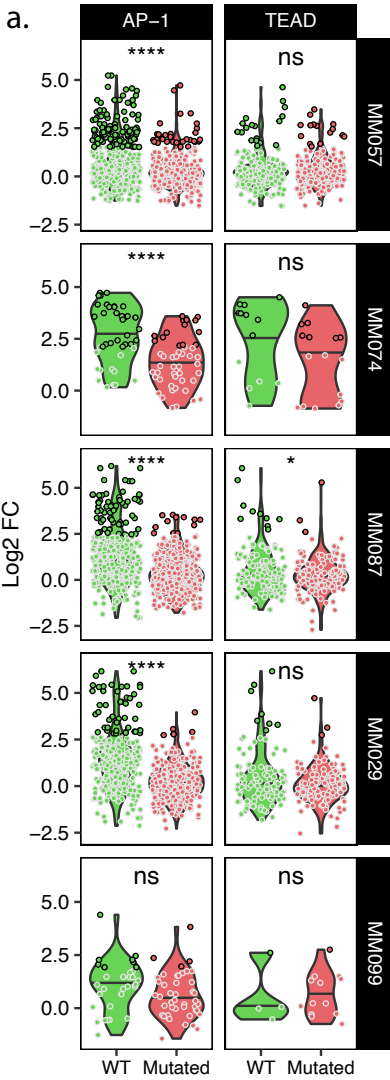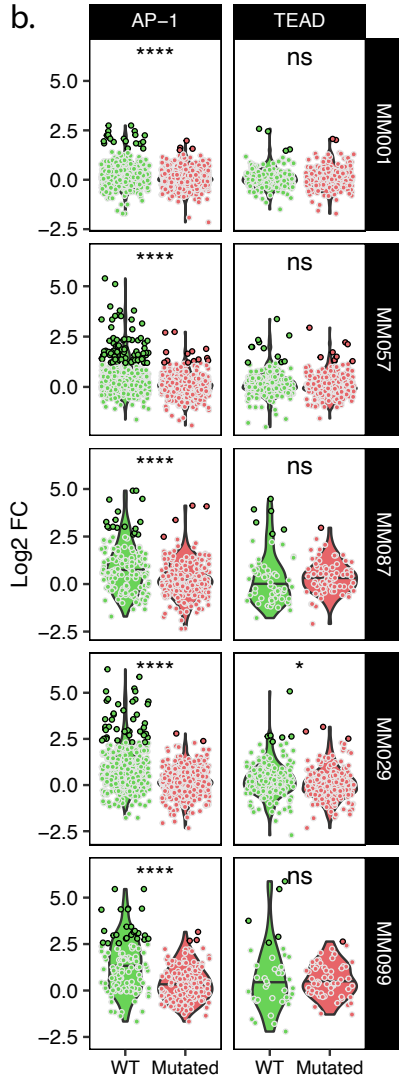

Supplement: supp [file elife-71735-supp-v1.zip]

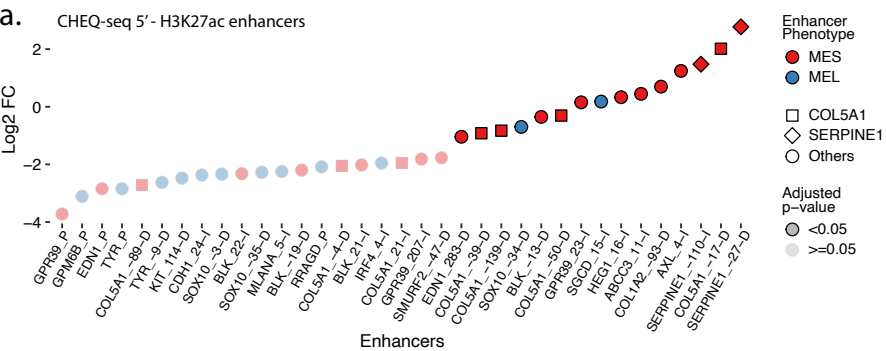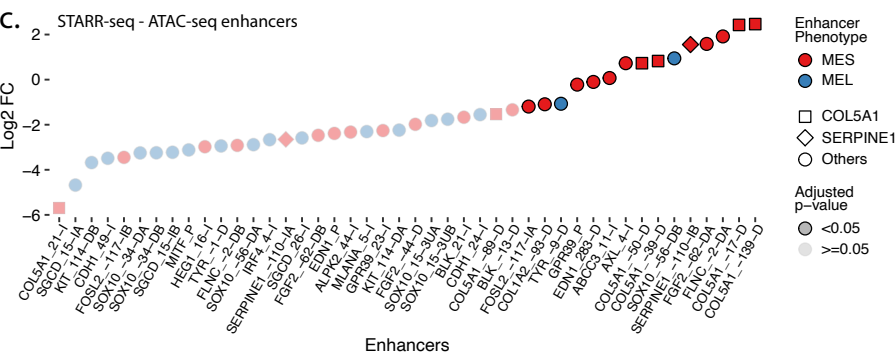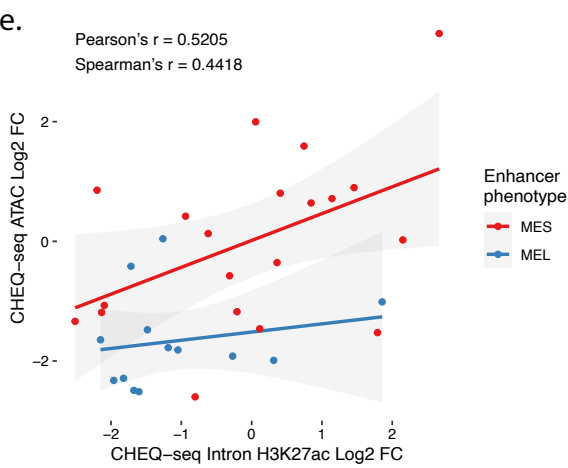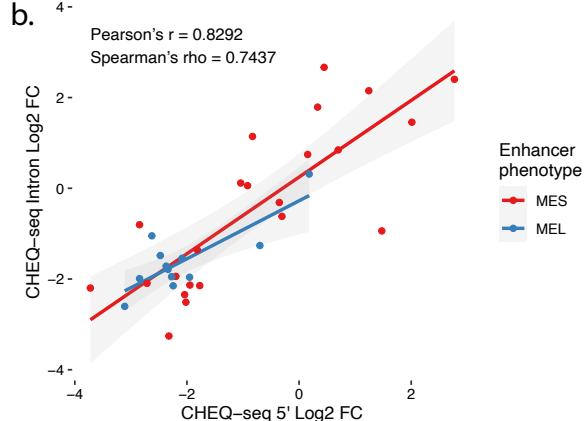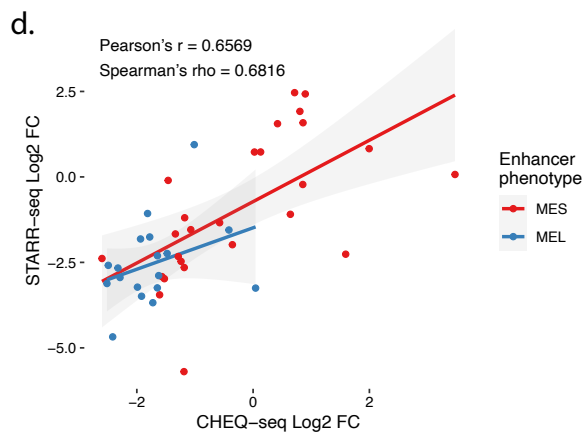

Supplement: supp [file elife-71735-supp-v1.zip]

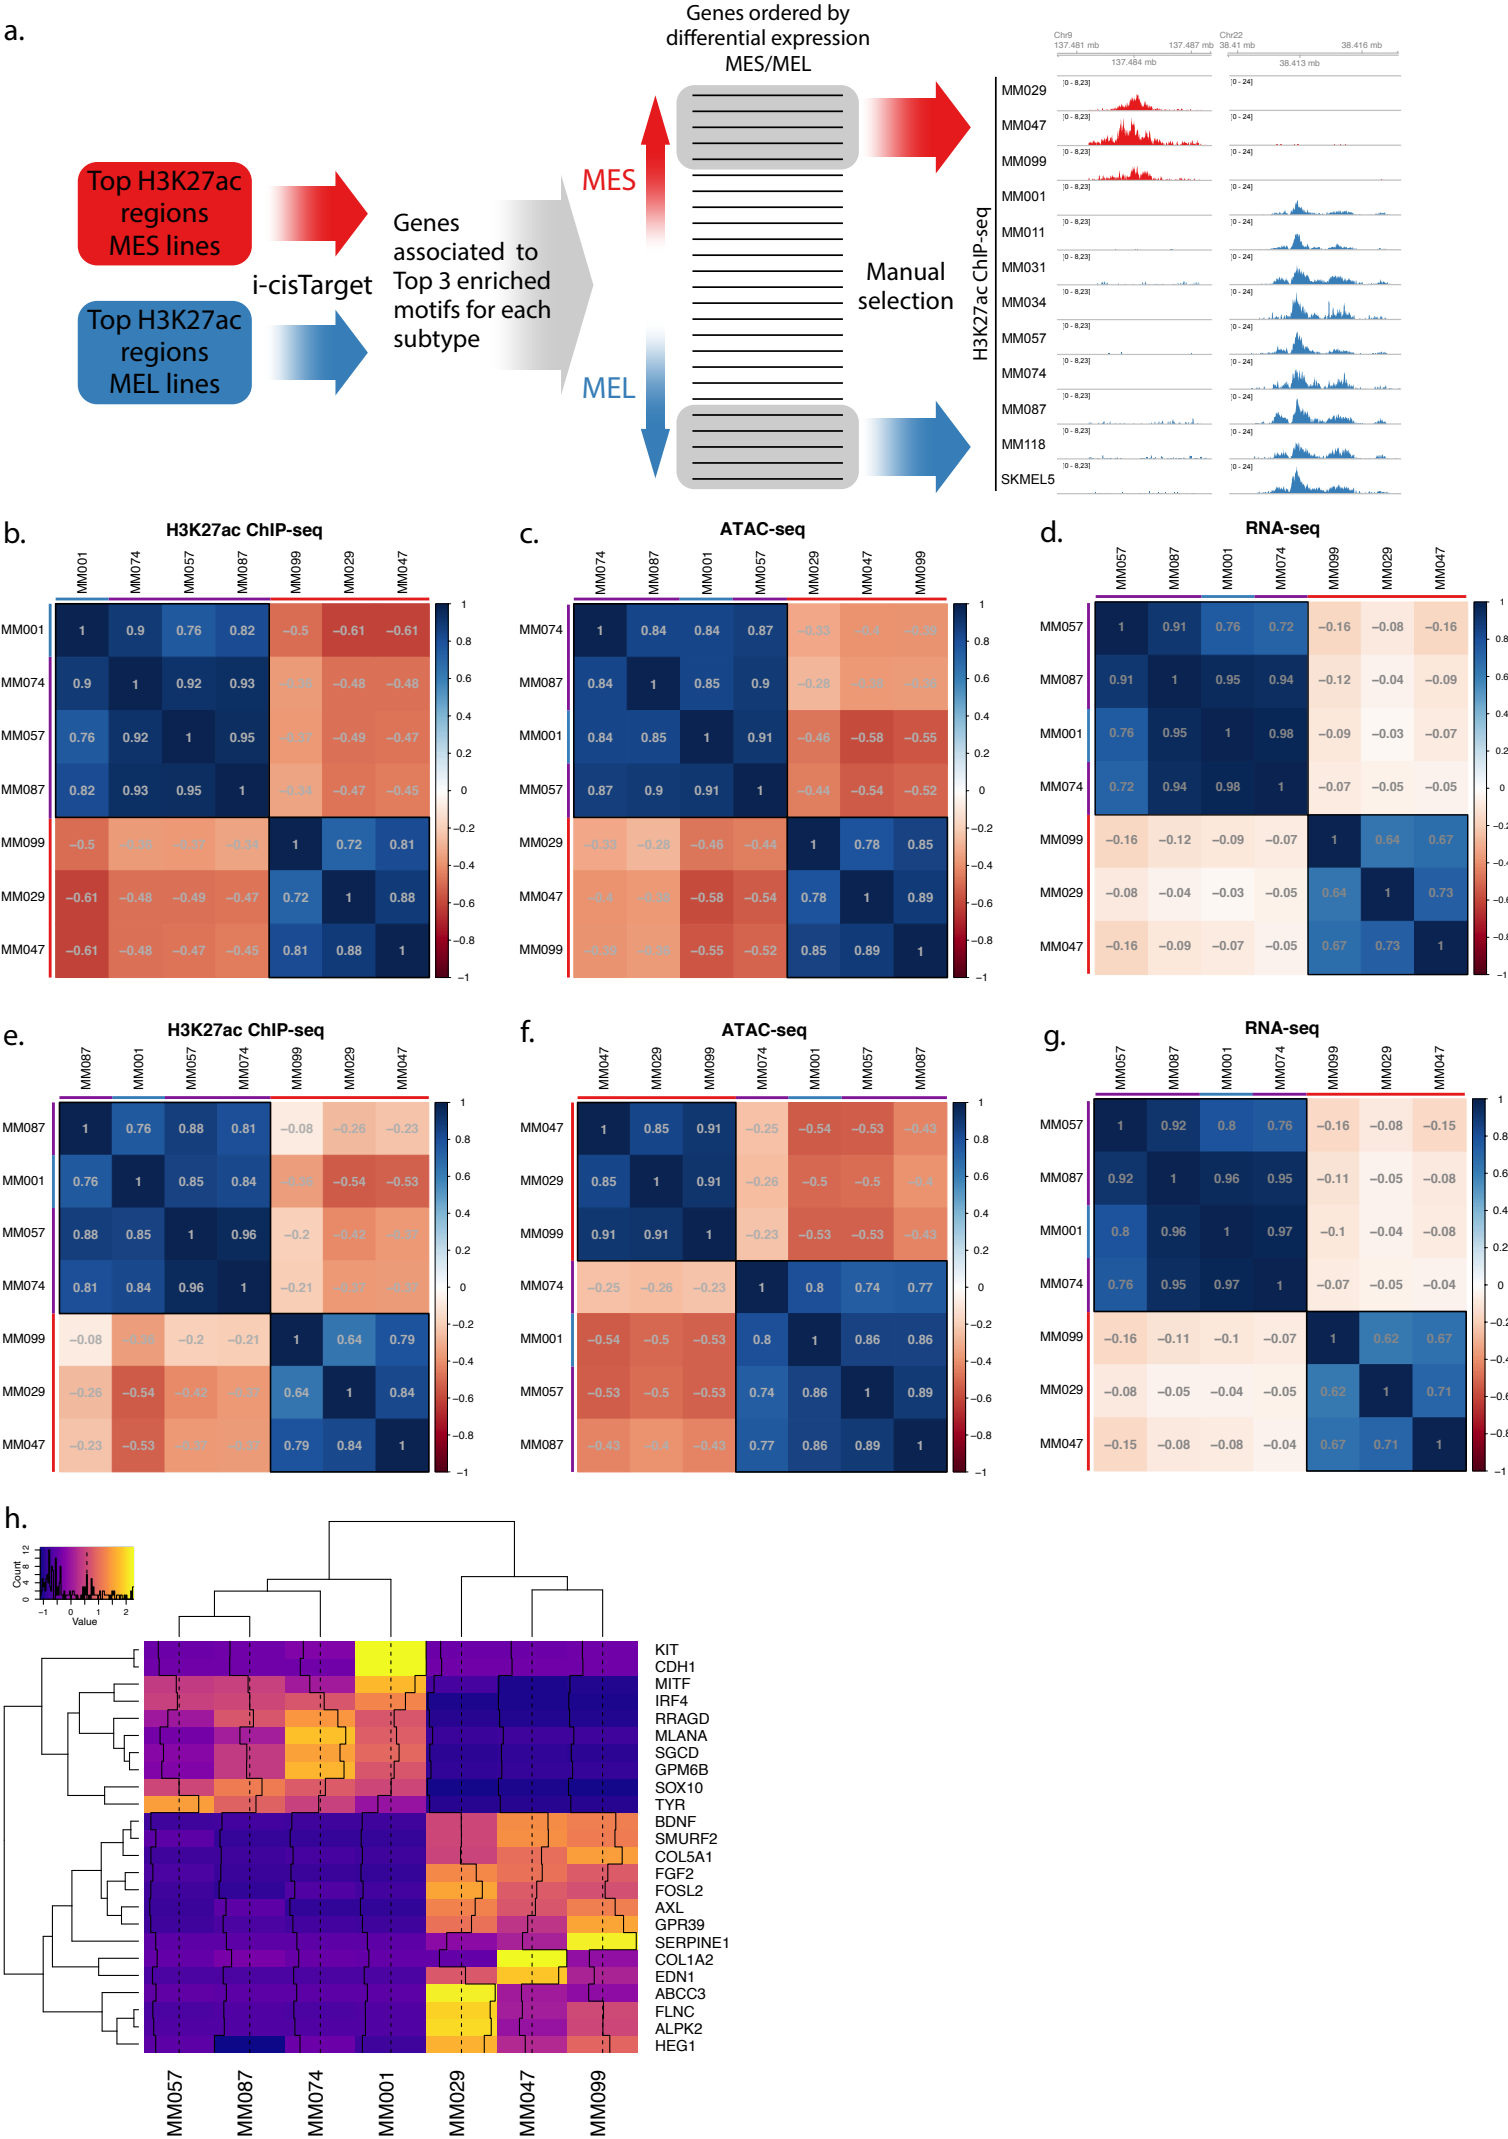

Supplement: supp [file elife-71735-supp-v1.zip]

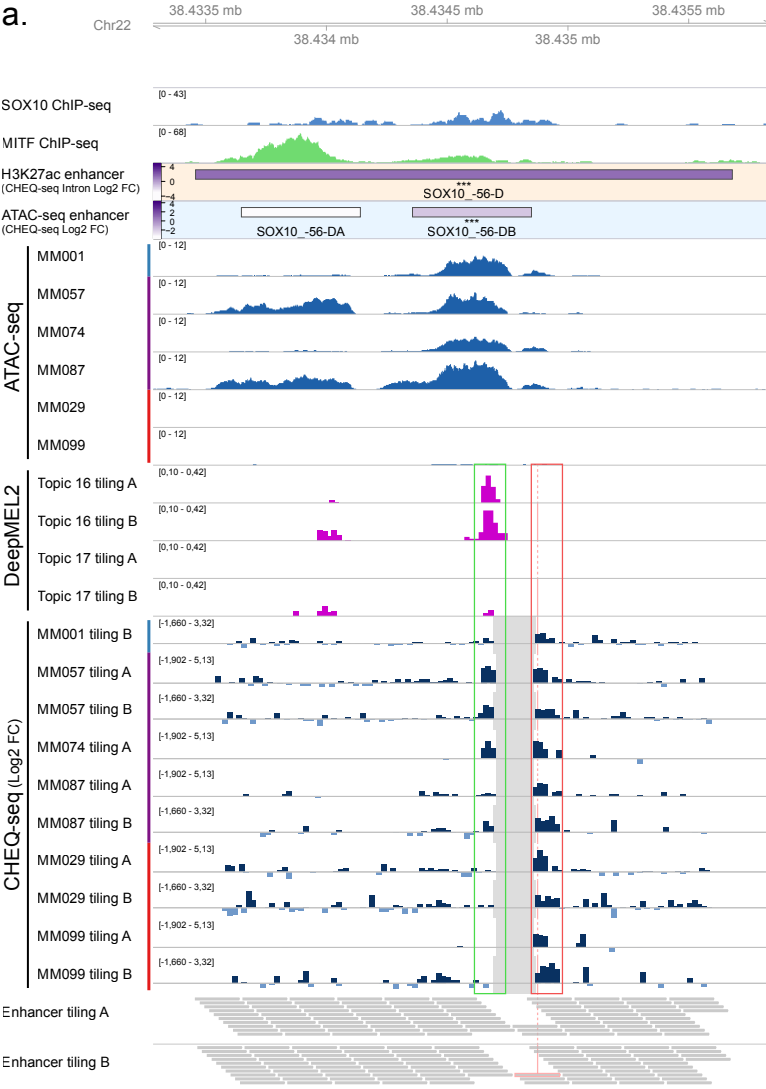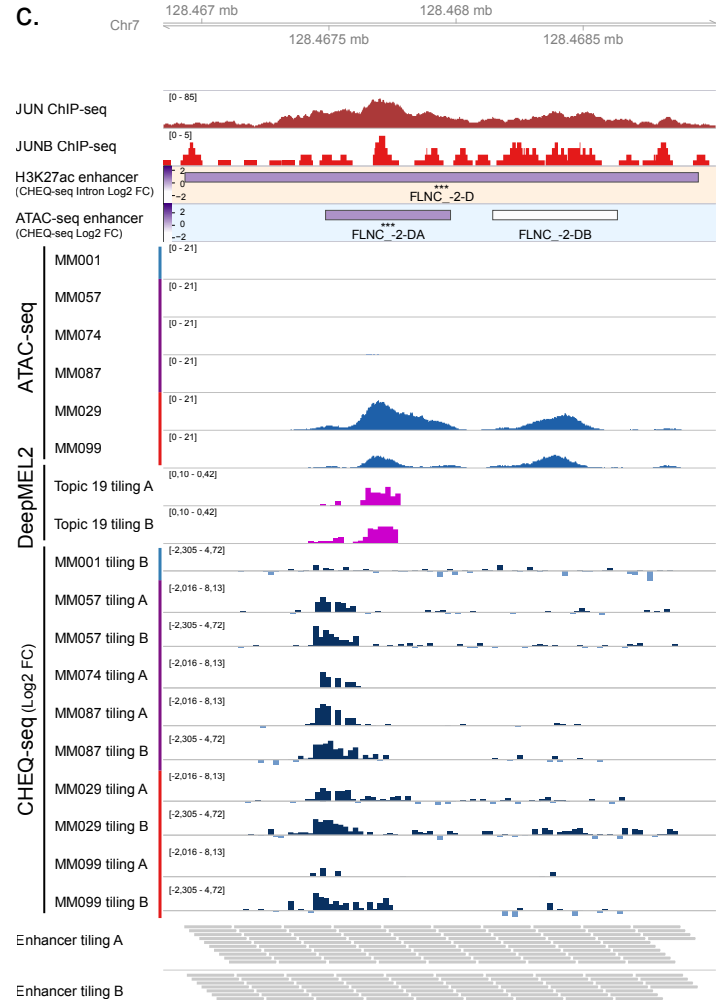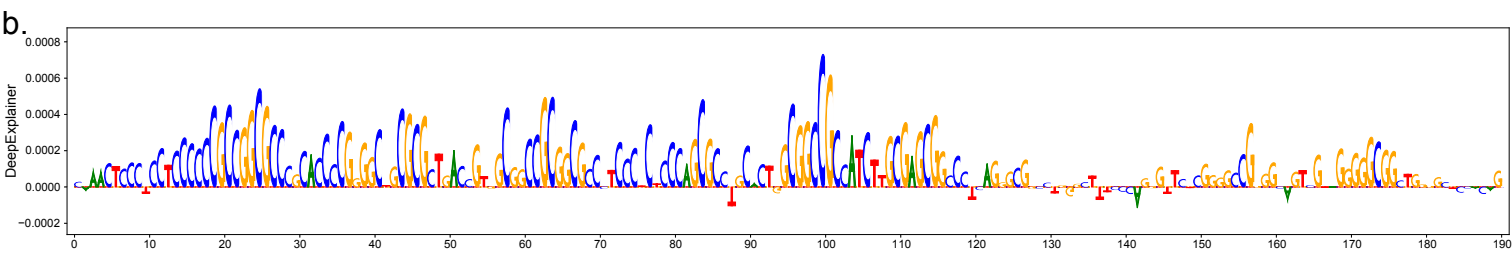

Supplement: supp [file elife-71735-supp-v1.zip]

a.

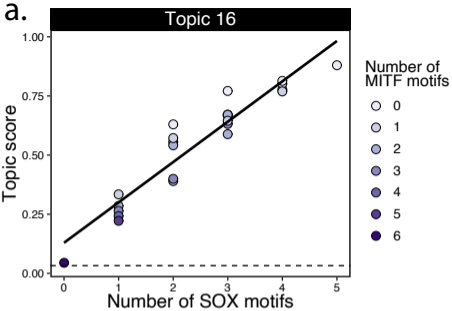

b.

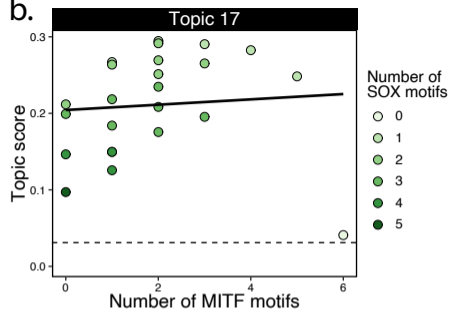

c.

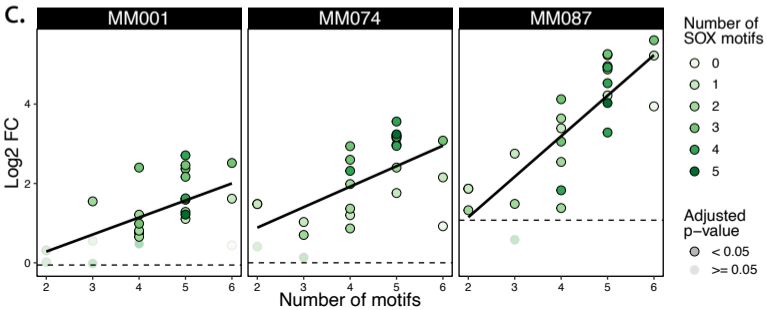

Supplement: supp [file elife-71735-supp-v1.zip]

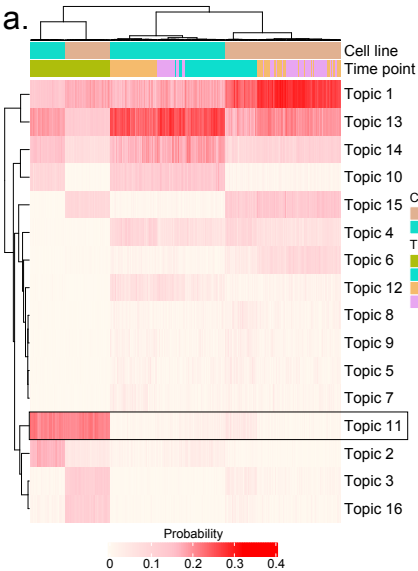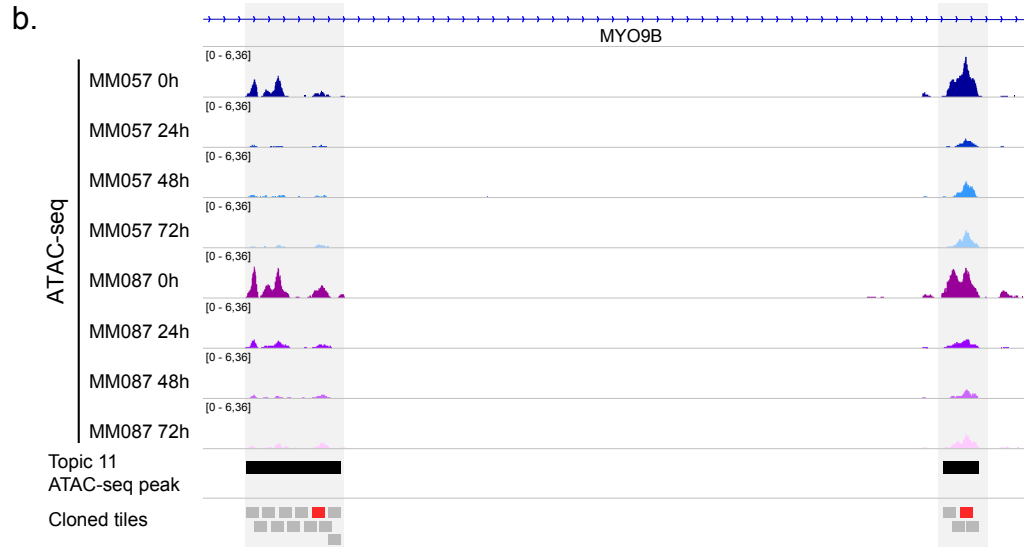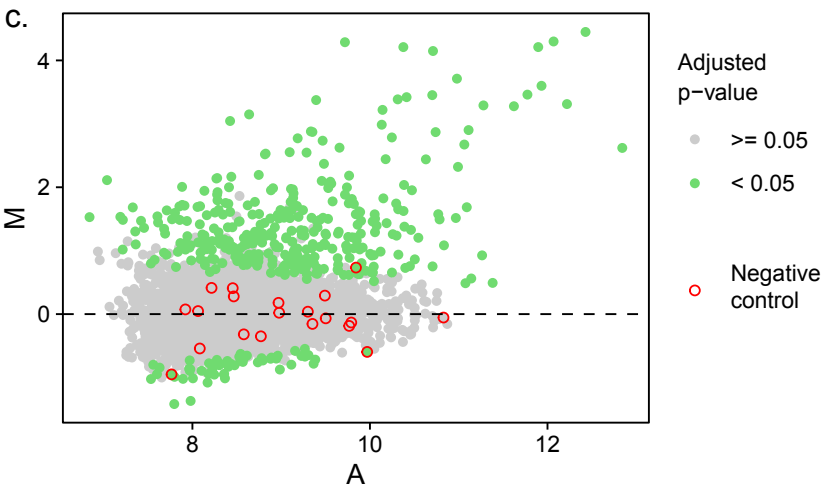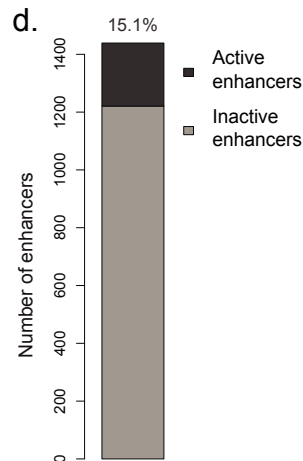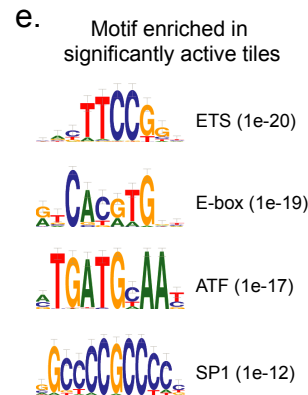

Supplement: supp [file elife-71735-supp-v1.zip]
